# Supplementary material for: The dehydrogenation of ammonia–borane catalysed by dicarbonylruthenacyclic(ii) complexes
Source: Royal Society of Chemistry journal article supplement (doi:10.1039/c0dt00241k), 2010-01-01
Supplement: c0dt00241k.pdf [file c0dt00241k.pdf]

# **The dehydrogenation of ammonia-borane catalysed by dicarbonylruthenacyclic complexes**

Cédric Boulho and Jean-Pierre Djukic

**Electronic Supporting Information**

EXTENDED CRYSTALLOGRAPHIC DATA FOR COMPOUND 7

4

FIGURE S1. MAGIC ANGLE SPINING  $^{11}\text{B}$  NMR SPECTRUM OF THE OFF-WHITE SOLID RESIDUE (ABOVE) AND THE SPECTRUM OF BORIC ACID (BELOW). 22

FIGURE S2. COULOMBIC MAP (BAR GRAPH IN A.U.) DRAWN OVER THE ISOSURFACE OF THE SCF ELECTRON DENSITY (0.030  $\text{e}/\text{BOHR}^3$ ) FOR CONFORMER A1. 23

FIGURE S3. DISPLACEMENT VECTORS FOR TS1 IN THE GAS PHASE SHOWING THE DIRECTION OF THE IMAGINARY VIBRATIONAL MODE. 24

FIGURE S4. DISPLACEMENT VECTORS FOR TS2 IN THE GAS PHASE SHOWING THE DIRECTION OF THE IMAGINARY VIBRATIONAL MODE. 24

COMPUTATIONAL DATA (BP86-D/TZP (ZORA): CARTESIAN COORDINATES, ENERGIES AND VIBRATIONAL MODES. 25

|                                                            |     |
|------------------------------------------------------------|-----|
| GAS PHASE                                                  | 25  |
| $\text{NH}_3\text{BH}_3$                                   | 26  |
| $\text{NH}_2\text{BH}_2$                                   | 28  |
| THF                                                        | 30  |
| H2                                                         | 32  |
| S1                                                         | 34  |
| A1                                                         | 38  |
| A2                                                         | 41  |
| P1                                                         | 44  |
| P2                                                         | 47  |
| P3                                                         | 50  |
| P3'                                                        | 53  |
| P4                                                         | 57  |
| P4'                                                        | 60  |
| TS1                                                        | 63  |
| TS2                                                        | 66  |
| 2-PHENYLPYRIDINE                                           | 69  |
| IN THF (COSMO, KLAMT'S ADJUSTMENT FOR VAN DER WAALS RADII) | 72  |
| $\text{NH}_3\text{BH}_3$                                   | 73  |
| $\text{NH}_2\text{BH}_2$                                   | 75  |
| THF                                                        | 77  |
| H2                                                         | 79  |
| S1                                                         | 81  |
| A1                                                         | 85  |
| A2                                                         | 88  |
| P1                                                         | 91  |
| P2                                                         | 94  |
| P3                                                         | 97  |
| P3'                                                        | 100 |
| P4                                                         | 104 |
| P4'                                                        | 107 |
| TS1                                                        | 110 |
| TS2                                                        | 113 |
| 2-PHENYLPYRIDINE                                           | 116 |
| ISOTOPIC EFFECTS                                           | 118 |
| P3-{D,H}                                                   | 118 |
| TS2-{D,H}                                                  | 120 |
| P4-{D,H}                                                   | 121 |
| P3-{H,D}                                                   | 123 |

TS2-{H,D}  
P4-{H,D}

125  
126

## • Extended crystallographic data for compound 7

### Crystal data

|                                |                                                           |
|--------------------------------|-----------------------------------------------------------|
| $C_{23}H_{23}ClN_2O_2Ru$       | $D_x = 1.492 \text{ Mg m}^{-3}$                           |
| $M_r = 495.95$                 |                                                           |
| Monoclinic, $P2_1/c$           | Mo $K\alpha$ radiation<br>$\lambda = 0.71073 \text{ \AA}$ |
| Hall symbol: $-P 2ybc$         | Cell parameters from 9007 reflections                     |
| $a = 17.6291 (5) \text{ \AA}$  | $\theta = 2.6\text{--}29.0^\circ$                         |
| $b = 11.5208 (3) \text{ \AA}$  | $\mu = 0.85 \text{ mm}^{-1}$                              |
| $c = 24.1776 (6) \text{ \AA}$  | $T = 173 (2) \text{ K}$                                   |
| $\beta = 115.955 (2)^\circ$    |                                                           |
| $V = 4415.2 (2) \text{ \AA}^3$ | Prism, yellow                                             |
| $Z = 8$                        | $0.40 \times 0.30 \times 0.15 \text{ mm}$                 |
| $F_{000} = 2016$               |                                                           |

### Data collection

|                                                  |                                        |
|--------------------------------------------------|----------------------------------------|
| Bruker APEX-II CCD diffractometer                | 33642 measured reflections             |
| Radiation source: fine-focus sealed tube         | 11736 independent reflections          |
| Monochromator: graphite                          | 9823 reflections with $I > 2\sigma(I)$ |
|                                                  | $R_{\text{int}} = 0.020$               |
| $T = 173(2) \text{ K}$                           | $\theta_{\text{max}} = 29.0^\circ$     |
| $P = ? \text{ kPa}$                              | $\theta_{\text{min}} = 1.3^\circ$      |
| $\phi$ and $\omega$ scans                        | $h = -24/24$                           |
| Absorption correction: multi-scan sadabs         | $k = -15/13$                           |
| $T_{\text{min}} = 0.727, T_{\text{max}} = 0.883$ | $l = -32/24$                           |

### Refinement

|                                 |                                                          |
|---------------------------------|----------------------------------------------------------|
| Refinement on $F^2$             | Secondary atom site location: difference Fourier map     |
| Least-squares matrix: full      | Hydrogen site location: inferred from neighbouring sites |
| $R[F^2 > 2\sigma(F^2)] = 0.030$ | H-atom parameters constrained                            |
| $wR(F^2) = 0.065$               | $w = 1/[\sigma^2(F_o^2) + (0.0084P)^2 + 5.7412P]$        |

|                                                                |                                                        |
|----------------------------------------------------------------|--------------------------------------------------------|
|                                                                | where $P = (F_o^2 + 2Fc^2)/3$                          |
| S = 1.15                                                       | $(\Delta/\sigma)_{\max} = 0.001$                       |
| 11736 reflections                                              | $\Delta\rho_{\max} = 0.69 \text{ e } \text{\AA}^{-3}$  |
| 531 parameters                                                 | $\Delta\rho_{\min} = -0.61 \text{ e } \text{\AA}^{-3}$ |
|                                                                | Extinction correction: none                            |
| Primary atom site location: structure-invariant direct methods |                                                        |

Fractional atomic coordinates and isotropic or equivalent isotropic displacement parameters ( $\text{\AA}^2$ )

|     | x             | y              | z             | $U_{\text{iso}}^*/U_{\text{eq}}$ |
|-----|---------------|----------------|---------------|----------------------------------|
| Ru1 | 0.521615 (10) | -0.644658 (15) | -0.146951 (7) | 0.02021 (4)                      |
| Cl1 | 0.63202 (3)   | -0.79448 (5)   | -0.12321 (3)  | 0.03101 (12)                     |
| O1  | 0.55903 (14)  | -0.6083 (2)    | -0.01454 (8)  | 0.0559 (6)                       |
| O2  | 0.64476 (12)  | -0.45991 (18)  | -0.14067 (10) | 0.0459 (5)                       |
| N1  | 0.48032 (10)  | -0.65600 (15)  | -0.24377 (7)  | 0.0189 (3)                       |
| N2  | 0.43206 (10)  | -0.78348 (16)  | -0.15892 (8)  | 0.0208 (3)                       |
| C1  | 0.51628 (13)  | -0.72037 (19)  | -0.27259 (10) | 0.0240 (4)                       |
| H1  | 0.5634        | -0.7677        | -0.2485       | 0.029*                           |
| C2  | 0.48707 (13)  | -0.72002 (19)  | -0.33585 (10) | 0.0250 (4)                       |
| H2  | 0.5143        | -0.7660        | -0.3544       | 0.030*                           |
| C3  | 0.41747 (13)  | -0.65190 (19)  | -0.37233 (9)  | 0.0230 (4)                       |
| C4  | 0.38011 (13)  | -0.58814 (18)  | -0.34239 (9)  | 0.0224 (4)                       |
| H4  | 0.3317        | -0.5424        | -0.3658       | 0.027*                           |
| C5  | 0.41241 (12)  | -0.58993 (17)  | -0.27834 (9)  | 0.0195 (4)                       |
| C6  | 0.37991 (12)  | -0.51973 (18)  | -0.24274 (9)  | 0.0194 (4)                       |
| C7  | 0.31143 (13)  | -0.44449 (19)  | -0.27007 (10) | 0.0241 (4)                       |
| H7  | 0.2817        | -0.4407        | -0.3136       | 0.029*                           |
| C8  | 0.28651 (14)  | -0.3754 (2)    | -0.23419 (10) | 0.0263 (4)                       |
| H8  | 0.2401        | -0.3240        | -0.2533       | 0.032*                           |
| C9  | 0.32887 (13)  | -0.38045 (19)  | -0.17036 (10) | 0.0243 (4)                       |
| C10 | 0.39551 (13)  | -0.45858 (18)  | -0.14317 (10) | 0.0223 (4)                       |
| H10 | 0.4229        | -0.4645        | -0.0996       | 0.027*                           |
| C11 | 0.42329 (12)  | -0.52841 (18)  | -0.17789 (9)  | 0.0203 (4)                       |
| C12 | 0.38739 (15)  | -0.6467 (2)    | -0.44201 (10) | 0.0292 (5)                       |

|      |               |                |               |              |
|------|---------------|----------------|---------------|--------------|
| C13  | 0.3731 (2)    | -0.7699 (3)    | -0.46815 (12) | 0.0534 (8)   |
| H13A | 0.4267        | -0.8123        | -0.4510       | 0.080*       |
| H13B | 0.3509        | -0.7664        | -0.5130       | 0.080*       |
| H13C | 0.3326        | -0.8100        | -0.4572       | 0.080*       |
| C14  | 0.4549 (2)    | -0.5854 (4)    | -0.45479 (13) | 0.0621 (10)  |
| H14A | 0.4631        | -0.5065        | -0.4381       | 0.093*       |
| H14B | 0.4368        | -0.5819        | -0.4993       | 0.093*       |
| H14C | 0.5080        | -0.6286        | -0.4352       | 0.093*       |
| C15  | 0.30464 (19)  | -0.5795 (3)    | -0.47447 (11) | 0.0500 (8)   |
| H15A | 0.2612        | -0.6155        | -0.4651       | 0.075*       |
| H15B | 0.2865        | -0.5811        | -0.5190       | 0.075*       |
| H15C | 0.3132        | -0.4989        | -0.4601       | 0.075*       |
| C16  | 0.30488 (16)  | -0.2992 (2)    | -0.13163 (12) | 0.0347 (5)   |
| H16A | 0.3319        | -0.2237        | -0.1289       | 0.052*       |
| H16B | 0.3237        | -0.3318        | -0.0903       | 0.052*       |
| H16C | 0.2435        | -0.2894        | -0.1506       | 0.052*       |
| C17  | 0.37519 (14)  | -0.7754 (2)    | -0.13612 (10) | 0.0290 (5)   |
| H17  | 0.3749        | -0.7077        | -0.1137       | 0.035*       |
| C18  | 0.31710 (15)  | -0.8618 (2)    | -0.14405 (11) | 0.0357 (6)   |
| H18  | 0.2778        | -0.8538        | -0.1272       | 0.043*       |
| C19  | 0.31680 (16)  | -0.9598 (2)    | -0.17676 (13) | 0.0380 (6)   |
| H19  | 0.2773        | -1.0203        | -0.1829       | 0.046*       |
| C20  | 0.37512 (16)  | -0.9683 (2)    | -0.20043 (12) | 0.0356 (5)   |
| H20  | 0.3759        | -1.0345        | -0.2236       | 0.043*       |
| C21  | 0.43219 (14)  | -0.8794 (2)    | -0.18992 (11) | 0.0289 (5)   |
| H21  | 0.4732        | -0.8866        | -0.2053       | 0.035*       |
| C22  | 0.54644 (15)  | -0.6243 (2)    | -0.06371 (11) | 0.0324 (5)   |
| C23  | 0.59799 (14)  | -0.5279 (2)    | -0.14209 (10) | 0.0278 (5)   |
| Ru2  | 0.033023 (10) | -0.929850 (15) | -0.139715 (7) | 0.01975 (4)  |
| Cl2  | 0.13685 (3)   | -0.77306 (5)   | -0.12274 (3)  | 0.02872 (11) |
| O3   | 0.09266 (12)  | -0.9770 (2)    | -0.00484 (8)  | 0.0474 (5)   |
| O4   | 0.15497 (13)  | -1.10167 (18)  | -0.14767 (11) | 0.0510 (5)   |

|      |               |               |               |             |
|------|---------------|---------------|---------------|-------------|
| N3   | -0.01950 (11) | -0.91734 (15) | -0.23726 (8)  | 0.0211 (3)  |
| N4   | -0.05661 (11) | -0.79628 (16) | -0.14417 (8)  | 0.0242 (4)  |
| C24  | 0.00996 (14)  | -0.8500 (2)   | -0.26916 (10) | 0.0276 (5)  |
| H24  | 0.0572        | -0.8015       | -0.2471       | 0.033*      |
| C25  | -0.02575 (15) | -0.8489 (2)   | -0.33243 (11) | 0.0318 (5)  |
| H25  | -0.0030       | -0.8003       | -0.3532       | 0.038*      |
| C26  | -0.09538 (15) | -0.9191 (2)   | -0.36628 (10) | 0.0275 (5)  |
| C27  | -0.12520 (14) | -0.98757 (19) | -0.33298 (10) | 0.0257 (4)  |
| H27  | -0.1729       | -1.0359       | -0.3543       | 0.031*      |
| C28  | -0.08667 (13) | -0.98707 (18) | -0.26874 (9)  | 0.0214 (4)  |
| C29  | -0.11149 (13) | -1.05988 (18) | -0.22951 (10) | 0.0215 (4)  |
| C30  | -0.17957 (14) | -1.1368 (2)   | -0.25315 (10) | 0.0269 (4)  |
| H30  | -0.2123       | -1.1428       | -0.2964       | 0.032*      |
| C31  | -0.19961 (14) | -1.2043 (2)   | -0.21405 (11) | 0.0301 (5)  |
| H31  | -0.2461       | -1.2562       | -0.2307       | 0.036*      |
| C32  | -0.15217 (15) | -1.1969 (2)   | -0.15051 (11) | 0.0284 (5)  |
| C33  | -0.08442 (14) | -1.11962 (19) | -0.12718 (10) | 0.0250 (4)  |
| H33  | -0.0522       | -1.1139       | -0.0839       | 0.030*      |
| C34  | -0.06232 (13) | -1.05057 (18) | -0.16516 (10) | 0.0213 (4)  |
| C35  | -0.13376 (17) | -0.9190 (2)   | -0.43684 (11) | 0.0364 (6)  |
| C36  | -0.1590 (2)   | -0.7942 (3)   | -0.46002 (12) | 0.0505 (8)  |
| H36A | -0.1972       | -0.7634       | -0.4439       | 0.076*      |
| H36B | -0.1875       | -0.7940       | -0.5051       | 0.076*      |
| H36C | -0.1084       | -0.7456       | -0.4458       | 0.076*      |
| C37  | -0.0674 (2)   | -0.9649 (4)   | -0.45625 (14) | 0.0636 (10) |
| H37A | -0.0167       | -0.9166       | -0.4379       | 0.095*      |
| H37B | -0.0901       | -0.9624       | -0.5012       | 0.095*      |
| H37C | -0.0531       | -1.0452       | -0.4421       | 0.095*      |
| C38  | -0.21235 (19) | -0.9948 (3)   | -0.46583 (12) | 0.0489 (7)  |
| H38A | -0.1970       | -1.0759       | -0.4540       | 0.073*      |
| H38B | -0.2369       | -0.9878       | -0.5107       | 0.073*      |
| H38C | -0.2537       | -0.9695       | -0.4514       | 0.073*      |

|      |               |             |               |            |
|------|---------------|-------------|---------------|------------|
| C39  | -0.17293 (18) | -1.2719 (2) | -0.10772 (13) | 0.0412 (6) |
| H39A | -0.1493       | -1.3497     | -0.1056       | 0.062*     |
| H39B | -0.2343       | -1.2775     | -0.1232       | 0.062*     |
| H39C | -0.1487       | -1.2372     | -0.0666       | 0.062*     |
| C40  | -0.11052 (14) | -0.8116 (2) | -0.11892 (11) | 0.0309 (5) |
| H40  | -0.1078       | -0.8816     | -0.0974       | 0.037*     |
| C41  | -0.16966 (15) | -0.7289 (3) | -0.12329 (12) | 0.0404 (6) |
| H41  | -0.2073       | -0.7425     | -0.1054       | 0.048*     |
| C42  | -0.17342 (16) | -0.6268 (3) | -0.15379 (14) | 0.0469 (7) |
| H42  | -0.2134       | -0.5687     | -0.1571       | 0.056*     |
| C43  | -0.11816 (16) | -0.6101 (2) | -0.17945 (14) | 0.0433 (7) |
| H43  | -0.1197       | -0.5405     | -0.2010       | 0.052*     |
| C44  | -0.06048 (15) | -0.6962 (2) | -0.17334 (12) | 0.0321 (5) |
| H44  | -0.0219       | -0.6838     | -0.1906       | 0.039*     |
| C45  | 0.07098 (14)  | -0.9557 (2) | -0.05497 (11) | 0.0296 (5) |
| C46  | 0.10886 (15)  | -1.0393 (2) | -0.14267 (11) | 0.0292 (5) |

Atomic displacement parameters ( $\text{\AA}^2$ )

|     | $U^{11}$    | $U^{22}$    | $U^{33}$    | $U^{12}$    | $U^{13}$    | $U^{23}$     |
|-----|-------------|-------------|-------------|-------------|-------------|--------------|
| Ru1 | 0.01879 (7) | 0.02368 (9) | 0.01814 (8) | 0.00362 (6) | 0.00806 (6) | 0.00113 (6)  |
| Cl1 | 0.0248 (2)  | 0.0340 (3)  | 0.0337 (3)  | 0.0095 (2)  | 0.0123 (2)  | 0.0035 (2)   |
| O1  | 0.0583 (13) | 0.0827 (17) | 0.0225 (9)  | 0.0134 (12) | 0.0137 (9)  | -0.0024 (10) |
| O2  | 0.0385 (10) | 0.0446 (12) | 0.0550 (12) | -0.0135 (9) | 0.0207 (9)  | -0.0104 (9)  |
| N1  | 0.0183 (7)  | 0.0199 (8)  | 0.0196 (8)  | 0.0009 (6)  | 0.0092 (6)  | 0.0001 (6)   |
| N2  | 0.0213 (8)  | 0.0224 (9)  | 0.0207 (8)  | 0.0077 (7)  | 0.0109 (7)  | 0.0078 (7)   |
| C1  | 0.0239 (10) | 0.0236 (11) | 0.0257 (10) | 0.0037 (8)  | 0.0121 (8)  | 0.0001 (8)   |
| C2  | 0.0269 (10) | 0.0237 (11) | 0.0281 (11) | 0.0007 (8)  | 0.0154 (9)  | -0.0044 (9)  |
| C3  | 0.0266 (10) | 0.0222 (10) | 0.0197 (9)  | -0.0047 (8) | 0.0097 (8)  | -0.0024 (8)  |
| C4  | 0.0235 (10) | 0.0213 (10) | 0.0202 (9)  | 0.0002 (8)  | 0.0076 (8)  | -0.0005 (8)  |
| C5  | 0.0210 (9)  | 0.0168 (9)  | 0.0206 (9)  | -0.0011 (7) | 0.0090 (8)  | 0.0009 (7)   |
| C6  | 0.0193 (9)  | 0.0187 (10) | 0.0218 (9)  | -0.0004 (7) | 0.0103 (8)  | 0.0015 (7)   |
| C7  | 0.0234 (10) | 0.0250 (11) | 0.0240 (10) | 0.0038 (8)  | 0.0104 (8)  | 0.0052 (8)   |



|     |             |             |             |              |             |              |
|-----|-------------|-------------|-------------|--------------|-------------|--------------|
| C8  | 0.0250 (10) | 0.0248 (11) | 0.0322 (11) | 0.0074 (8)   | 0.0154 (9)  | 0.0076 (9)   |
| C9  | 0.0247 (10) | 0.0211 (10) | 0.0325 (11) | 0.0024 (8)   | 0.0176 (9)  | 0.0023 (8)   |
| C10 | 0.0233 (10) | 0.0228 (10) | 0.0225 (10) | 0.0018 (8)   | 0.0117 (8)  | 0.0018 (8)   |
| C11 | 0.0179 (9)  | 0.0223 (10) | 0.0210 (9)  | -0.0010 (7)  | 0.0088 (8)  | 0.0017 (8)   |
| C12 | 0.0361 (12) | 0.0311 (12) | 0.0198 (10) | -0.0036 (10) | 0.0118 (9)  | -0.0037 (9)  |
| C13 | 0.087 (2)   | 0.0402 (16) | 0.0262 (13) | -0.0023 (16) | 0.0180 (14) | -0.0106 (12) |
| C14 | 0.0559 (18) | 0.103 (3)   | 0.0276 (13) | -0.0290 (19) | 0.0188 (13) | 0.0054 (16)  |
| C15 | 0.0545 (17) | 0.065 (2)   | 0.0203 (12) | 0.0109 (15)  | 0.0066 (11) | -0.0014 (12) |
| C16 | 0.0388 (13) | 0.0338 (13) | 0.0386 (13) | 0.0105 (11)  | 0.0234 (11) | -0.0005 (11) |
| C17 | 0.0273 (11) | 0.0364 (13) | 0.0271 (11) | 0.0077 (9)   | 0.0154 (9)  | 0.0079 (9)   |
| C18 | 0.0279 (11) | 0.0474 (16) | 0.0368 (13) | 0.0057 (11)  | 0.0187 (10) | 0.0150 (12)  |
| C19 | 0.0285 (12) | 0.0349 (14) | 0.0473 (15) | -0.0002 (10) | 0.0135 (11) | 0.0141 (11)  |
| C20 | 0.0340 (12) | 0.0255 (12) | 0.0464 (15) | 0.0013 (10)  | 0.0167 (11) | 0.0026 (10)  |
| C21 | 0.0275 (11) | 0.0271 (12) | 0.0364 (12) | 0.0051 (9)   | 0.0178 (10) | 0.0036 (9)   |
| C22 | 0.0273 (11) | 0.0403 (14) | 0.0273 (11) | 0.0055 (10)  | 0.0098 (9)  | -0.0022 (10) |
| C23 | 0.0243 (10) | 0.0310 (12) | 0.0265 (11) | 0.0047 (9)   | 0.0096 (9)  | -0.0048 (9)  |
| Ru2 | 0.01969 (8) | 0.02131 (8) | 0.02040 (8) | -0.00284 (6) | 0.01076 (6) | -0.00200 (6) |
| Cl2 | 0.0233 (2)  | 0.0289 (3)  | 0.0336 (3)  | -0.0056 (2)  | 0.0121 (2)  | -0.0011 (2)  |
| O3  | 0.0468 (11) | 0.0701 (14) | 0.0249 (9)  | -0.0095 (10) | 0.0151 (8)  | 0.0001 (9)   |
| O4  | 0.0523 (12) | 0.0416 (11) | 0.0758 (15) | 0.0182 (9)   | 0.0435 (11) | 0.0123 (10)  |
| N3  | 0.0226 (8)  | 0.0210 (9)  | 0.0227 (8)  | -0.0021 (7)  | 0.0127 (7)  | -0.0012 (7)  |
| N4  | 0.0197 (8)  | 0.0257 (9)  | 0.0299 (9)  | -0.0091 (7)  | 0.0133 (7)  | -0.0117 (8)  |
| C24 | 0.0301 (11) | 0.0271 (11) | 0.0277 (11) | -0.0039 (9)  | 0.0145 (9)  | -0.0003 (9)  |
| C25 | 0.0393 (13) | 0.0282 (12) | 0.0297 (11) | -0.0034 (10) | 0.0168 (10) | 0.0055 (10)  |
| C26 | 0.0345 (11) | 0.0255 (11) | 0.0217 (10) | 0.0049 (9)   | 0.0115 (9)  | 0.0000 (8)   |
| C27 | 0.0279 (10) | 0.0231 (11) | 0.0225 (10) | -0.0003 (8)  | 0.0078 (8)  | -0.0034 (8)  |
| C28 | 0.0222 (9)  | 0.0198 (10) | 0.0234 (10) | 0.0008 (8)   | 0.0110 (8)  | -0.0027 (8)  |
| C29 | 0.0225 (9)  | 0.0173 (10) | 0.0273 (10) | -0.0004 (8)  | 0.0132 (8)  | -0.0039 (8)  |
| C30 | 0.0255 (10) | 0.0258 (11) | 0.0299 (11) | -0.0049 (9)  | 0.0127 (9)  | -0.0073 (9)  |
| C31 | 0.0288 (11) | 0.0252 (11) | 0.0398 (13) | -0.0090 (9)  | 0.0182 (10) | -0.0081 (10) |
| C32 | 0.0326 (11) | 0.0226 (11) | 0.0395 (13) | -0.0029 (9)  | 0.0246 (10) | -0.0022 (9)  |
| C33 | 0.0296 (11) | 0.0242 (11) | 0.0270 (10) | -0.0036 (9)  | 0.0179 (9)  | -0.0027 (8)  |

|     |             |             |             |              |             |              |
|-----|-------------|-------------|-------------|--------------|-------------|--------------|
| C34 | 0.0223 (9)  | 0.0200 (10) | 0.0251 (10) | -0.0004 (8)  | 0.0135 (8)  | -0.0060 (8)  |
| C35 | 0.0488 (15) | 0.0360 (14) | 0.0200 (10) | 0.0050 (11)  | 0.0112 (10) | -0.0007 (10) |
| C36 | 0.074 (2)   | 0.0448 (17) | 0.0266 (13) | 0.0036 (15)  | 0.0162 (13) | 0.0072 (12)  |
| C37 | 0.069 (2)   | 0.091 (3)   | 0.0323 (15) | 0.018 (2)    | 0.0244 (15) | -0.0082 (16) |
| C38 | 0.0597 (18) | 0.0458 (16) | 0.0242 (12) | -0.0009 (14) | 0.0025 (12) | -0.0022 (11) |
| C39 | 0.0497 (15) | 0.0364 (14) | 0.0495 (16) | -0.0131 (12) | 0.0328 (13) | 0.0000 (12)  |
| C40 | 0.0266 (11) | 0.0402 (14) | 0.0286 (11) | -0.0066 (10) | 0.0145 (9)  | -0.0122 (10) |
| C41 | 0.0282 (12) | 0.0580 (18) | 0.0393 (14) | -0.0062 (12) | 0.0189 (11) | -0.0239 (13) |
| C42 | 0.0279 (12) | 0.0486 (17) | 0.0585 (18) | 0.0034 (12)  | 0.0137 (12) | -0.0236 (14) |
| C43 | 0.0325 (13) | 0.0318 (14) | 0.0596 (18) | 0.0040 (11)  | 0.0146 (12) | -0.0063 (12) |
| C44 | 0.0273 (11) | 0.0266 (12) | 0.0432 (14) | -0.0035 (9)  | 0.0162 (10) | -0.0026 (10) |
| C45 | 0.0230 (10) | 0.0357 (13) | 0.0301 (12) | -0.0059 (9)  | 0.0116 (9)  | 0.0002 (10)  |
| C46 | 0.0295 (11) | 0.0269 (12) | 0.0341 (12) | -0.0029 (9)  | 0.0167 (10) | 0.0022 (9)   |

Geometric parameters (Å, °)

|         |             |         |             |
|---------|-------------|---------|-------------|
| Ru1—C23 | 1.870 (2)   | Ru2—C46 | 1.862 (2)   |
| Ru1—C22 | 1.878 (2)   | Ru2—C45 | 1.880 (2)   |
| Ru1—C11 | 2.055 (2)   | Ru2—C34 | 2.057 (2)   |
| Ru1—N1  | 2.1295 (16) | Ru2—N3  | 2.1281 (17) |
| Ru1—N2  | 2.1758 (18) | Ru2—N4  | 2.1742 (18) |
| Ru1—Cl1 | 2.4737 (6)  | Ru2—Cl2 | 2.4747 (6)  |
| O1—C22  | 1.125 (3)   | O3—C45  | 1.127 (3)   |
| O2—C23  | 1.126 (3)   | O4—C46  | 1.130 (3)   |
| N1—C1   | 1.351 (3)   | N3—C24  | 1.348 (3)   |
| N1—C5   | 1.355 (2)   | N3—C28  | 1.356 (3)   |
| N2—C21  | 1.335 (3)   | N4—C44  | 1.338 (3)   |
| N2—C17  | 1.342 (3)   | N4—C40  | 1.347 (3)   |
| C1—C2   | 1.384 (3)   | C24—C25 | 1.376 (3)   |
| C1—H1   | 0.9500      | C24—H24 | 0.9500      |
| C2—C3   | 1.397 (3)   | C25—C26 | 1.397 (3)   |
| C2—H2   | 0.9500      | C25—H25 | 0.9500      |
| C3—C4   | 1.384 (3)   | C26—C27 | 1.385 (3)   |

|          |           |          |           |
|----------|-----------|----------|-----------|
| C3—C12   | 1.530 (3) | C26—C35  | 1.535 (3) |
| C4—C5    | 1.397 (3) | C27—C28  | 1.396 (3) |
| C4—H4    | 0.9500    | C27—H27  | 0.9500    |
| C5—C6    | 1.468 (3) | C28—C29  | 1.469 (3) |
| C6—C7    | 1.395 (3) | C29—C30  | 1.397 (3) |
| C6—C11   | 1.416 (3) | C29—C34  | 1.415 (3) |
| C7—C8    | 1.383 (3) | C30—C31  | 1.384 (3) |
| C7—H7    | 0.9500    | C30—H30  | 0.9500    |
| C8—C9    | 1.391 (3) | C31—C32  | 1.394 (3) |
| C8—H8    | 0.9500    | C31—H31  | 0.9500    |
| C9—C10   | 1.395 (3) | C32—C33  | 1.396 (3) |
| C9—C16   | 1.509 (3) | C32—C39  | 1.511 (3) |
| C10—C11  | 1.397 (3) | C33—C34  | 1.393 (3) |
| C10—H10  | 0.9500    | C33—H33  | 0.9500    |
| C12—C14  | 1.527 (4) | C35—C38  | 1.525 (4) |
| C12—C13  | 1.529 (4) | C35—C37  | 1.532 (4) |
| C12—C15  | 1.530 (4) | C35—C36  | 1.537 (4) |
| C13—H13A | 0.9800    | C36—H36A | 0.9800    |
| C13—H13B | 0.9800    | C36—H36B | 0.9800    |
| C13—H13C | 0.9800    | C36—H36C | 0.9800    |
| C14—H14A | 0.9800    | C37—H37A | 0.9800    |
| C14—H14B | 0.9800    | C37—H37B | 0.9800    |
| C14—H14C | 0.9800    | C37—H37C | 0.9800    |
| C15—H15A | 0.9800    | C38—H38A | 0.9800    |
| C15—H15B | 0.9800    | C38—H38B | 0.9800    |
| C15—H15C | 0.9800    | C38—H38C | 0.9800    |
| C16—H16A | 0.9800    | C39—H39A | 0.9800    |
| C16—H16B | 0.9800    | C39—H39B | 0.9800    |
| C16—H16C | 0.9800    | C39—H39C | 0.9800    |
| C17—C18  | 1.380 (3) | C40—C41  | 1.382 (4) |
| C17—H17  | 0.9500    | C40—H40  | 0.9500    |
| C18—C19  | 1.377 (4) | C41—C42  | 1.374 (4) |

|             |             |             |             |
|-------------|-------------|-------------|-------------|
| C18—H18     | 0.9500      | C41—H41     | 0.9500      |
| C19—C20     | 1.382 (4)   | C42—C43     | 1.378 (4)   |
| C19—H19     | 0.9500      | C42—H42     | 0.9500      |
| C20—C21     | 1.380 (3)   | C43—C44     | 1.381 (3)   |
| C20—H20     | 0.9500      | C43—H43     | 0.9500      |
| C21—H21     | 0.9500      | C44—H44     | 0.9500      |
| C23—Ru1—C22 | 91.10 (11)  | C46—Ru2—C45 | 90.88 (10)  |
| C23—Ru1—C11 | 91.34 (9)   | C46—Ru2—C34 | 92.12 (9)   |
| C22—Ru1—C11 | 94.16 (9)   | C45—Ru2—C34 | 94.20 (9)   |
| C23—Ru1—N1  | 90.21 (8)   | C46—Ru2—N3  | 88.56 (9)   |
| C22—Ru1—N1  | 173.22 (8)  | C45—Ru2—N3  | 173.32 (8)  |
| C11—Ru1—N1  | 79.15 (7)   | C34—Ru2—N3  | 79.17 (7)   |
| C23—Ru1—N2  | 176.02 (8)  | C46—Ru2—N4  | 174.85 (9)  |
| C22—Ru1—N2  | 92.83 (9)   | C45—Ru2—N4  | 94.05 (9)   |
| C11—Ru1—N2  | 89.04 (7)   | C34—Ru2—N4  | 89.01 (7)   |
| N1—Ru1—N2   | 85.97 (6)   | N3—Ru2—N4   | 86.72 (7)   |
| C23—Ru1—Cl1 | 90.90 (7)   | C46—Ru2—Cl2 | 90.54 (7)   |
| C22—Ru1—Cl1 | 92.73 (7)   | C45—Ru2—Cl2 | 92.88 (7)   |
| C11—Ru1—Cl1 | 172.71 (6)  | C34—Ru2—Cl2 | 172.39 (6)  |
| N1—Ru1—Cl1  | 93.90 (5)   | N3—Ru2—Cl2  | 93.77 (5)   |
| N2—Ru1—Cl1  | 88.25 (5)   | N4—Ru2—Cl2  | 87.73 (5)   |
| C1—N1—C5    | 118.54 (17) | C24—N3—C28  | 118.71 (18) |
| C1—N1—Ru1   | 126.08 (14) | C24—N3—Ru2  | 125.69 (14) |
| C5—N1—Ru1   | 115.37 (13) | C28—N3—Ru2  | 115.56 (14) |
| C21—N2—C17  | 118.2 (2)   | C44—N4—C40  | 117.9 (2)   |
| C21—N2—Ru1  | 120.21 (14) | C44—N4—Ru2  | 120.30 (15) |
| C17—N2—Ru1  | 121.55 (16) | C40—N4—Ru2  | 121.78 (17) |
| N1—C1—C2    | 122.48 (19) | N3—C24—C25  | 122.6 (2)   |
| N1—C1—H1    | 118.8       | N3—C24—H24  | 118.7       |
| C2—C1—H1    | 118.8       | C25—C24—H24 | 118.7       |
| C1—C2—C3    | 119.9 (2)   | C24—C25—C26 | 120.2 (2)   |
| C1—C2—H2    | 120.0       | C24—C25—H25 | 119.9       |

|             |             |             |             |
|-------------|-------------|-------------|-------------|
| C3—C2—H2    | 120.0       | C26—C25—H25 | 119.9       |
| C4—C3—C2    | 117.10 (19) | C27—C26—C25 | 116.7 (2)   |
| C4—C3—C12   | 122.7 (2)   | C27—C26—C35 | 123.5 (2)   |
| C2—C3—C12   | 120.16 (19) | C25—C26—C35 | 119.8 (2)   |
| C3—C4—C5    | 121.04 (19) | C26—C27—C28 | 121.4 (2)   |
| C3—C4—H4    | 119.5       | C26—C27—H27 | 119.3       |
| C5—C4—H4    | 119.5       | C28—C27—H27 | 119.3       |
| N1—C5—C4    | 120.92 (19) | N3—C28—C27  | 120.5 (2)   |
| N1—C5—C6    | 114.46 (17) | N3—C28—C29  | 114.19 (18) |
| C4—C5—C6    | 124.58 (18) | C27—C28—C29 | 125.34 (19) |
| C7—C6—C11   | 120.28 (19) | C30—C29—C34 | 120.1 (2)   |
| C7—C6—C5    | 122.92 (19) | C30—C29—C28 | 122.91 (19) |
| C11—C6—C5   | 116.77 (18) | C34—C29—C28 | 117.02 (18) |
| C8—C7—C6    | 120.5 (2)   | C31—C30—C29 | 120.5 (2)   |
| C8—C7—H7    | 119.8       | C31—C30—H30 | 119.8       |
| C6—C7—H7    | 119.8       | C29—C30—H30 | 119.8       |
| C7—C8—C9    | 120.5 (2)   | C30—C31—C32 | 120.6 (2)   |
| C7—C8—H8    | 119.7       | C30—C31—H31 | 119.7       |
| C9—C8—H8    | 119.7       | C32—C31—H31 | 119.7       |
| C8—C9—C10   | 118.8 (2)   | C31—C32—C33 | 118.6 (2)   |
| C8—C9—C16   | 120.1 (2)   | C31—C32—C39 | 120.8 (2)   |
| C10—C9—C16  | 121.0 (2)   | C33—C32—C39 | 120.6 (2)   |
| C9—C10—C11  | 122.2 (2)   | C34—C33—C32 | 122.3 (2)   |
| C9—C10—H10  | 118.9       | C34—C33—H33 | 118.8       |
| C11—C10—H10 | 118.9       | C32—C33—H33 | 118.8       |
| C10—C11—C6  | 117.61 (18) | C33—C34—C29 | 117.90 (19) |
| C10—C11—Ru1 | 128.20 (15) | C33—C34—Ru2 | 128.05 (16) |
| C6—C11—Ru1  | 114.19 (15) | C29—C34—Ru2 | 114.02 (15) |
| C14—C12—C13 | 110.3 (3)   | C38—C35—C37 | 108.8 (2)   |
| C14—C12—C3  | 108.40 (19) | C38—C35—C26 | 112.3 (2)   |
| C13—C12—C3  | 109.5 (2)   | C37—C35—C26 | 108.4 (2)   |
| C14—C12—C15 | 108.3 (2)   | C38—C35—C36 | 108.0 (2)   |

|               |           |               |           |
|---------------|-----------|---------------|-----------|
| C13—C12—C15   | 108.1 (2) | C37—C35—C36   | 110.5 (3) |
| C3—C12—C15    | 112.2 (2) | C26—C35—C36   | 108.8 (2) |
| C12—C13—H13A  | 109.5     | C35—C36—H36A  | 109.5     |
| C12—C13—H13B  | 109.5     | C35—C36—H36B  | 109.5     |
| H13A—C13—H13B | 109.5     | H36A—C36—H36B | 109.5     |
| C12—C13—H13C  | 109.5     | C35—C36—H36C  | 109.5     |
| H13A—C13—H13C | 109.5     | H36A—C36—H36C | 109.5     |
| H13B—C13—H13C | 109.5     | H36B—C36—H36C | 109.5     |
| C12—C14—H14A  | 109.5     | C35—C37—H37A  | 109.5     |
| C12—C14—H14B  | 109.5     | C35—C37—H37B  | 109.5     |
| H14A—C14—H14B | 109.5     | H37A—C37—H37B | 109.5     |
| C12—C14—H14C  | 109.5     | C35—C37—H37C  | 109.5     |
| H14A—C14—H14C | 109.5     | H37A—C37—H37C | 109.5     |
| H14B—C14—H14C | 109.5     | H37B—C37—H37C | 109.5     |
| C12—C15—H15A  | 109.5     | C35—C38—H38A  | 109.5     |
| C12—C15—H15B  | 109.5     | C35—C38—H38B  | 109.5     |
| H15A—C15—H15B | 109.5     | H38A—C38—H38B | 109.5     |
| C12—C15—H15C  | 109.5     | C35—C38—H38C  | 109.5     |
| H15A—C15—H15C | 109.5     | H38A—C38—H38C | 109.5     |
| H15B—C15—H15C | 109.5     | H38B—C38—H38C | 109.5     |
| C9—C16—H16A   | 109.5     | C32—C39—H39A  | 109.5     |
| C9—C16—H16B   | 109.5     | C32—C39—H39B  | 109.5     |
| H16A—C16—H16B | 109.5     | H39A—C39—H39B | 109.5     |
| C9—C16—H16C   | 109.5     | C32—C39—H39C  | 109.5     |
| H16A—C16—H16C | 109.5     | H39A—C39—H39C | 109.5     |
| H16B—C16—H16C | 109.5     | H39B—C39—H39C | 109.5     |
| N2—C17—C18    | 122.3 (2) | N4—C40—C41    | 122.3 (3) |
| N2—C17—H17    | 118.8     | N4—C40—H40    | 118.9     |
| C18—C17—H17   | 118.8     | C41—C40—H40   | 118.9     |
| C19—C18—C17   | 119.2 (2) | C42—C41—C40   | 119.2 (2) |
| C19—C18—H18   | 120.4     | C42—C41—H41   | 120.4     |
| C17—C18—H18   | 120.4     | C40—C41—H41   | 120.4     |

|                |              |                 |              |
|----------------|--------------|-----------------|--------------|
| C18—C19—C20    | 118.7 (2)    | C41—C42—C43     | 118.9 (3)    |
| C18—C19—H19    | 120.7        | C41—C42—H42     | 120.5        |
| C20—C19—H19    | 120.7        | C43—C42—H42     | 120.5        |
| C21—C20—C19    | 119.1 (2)    | C42—C43—C44     | 119.0 (3)    |
| C21—C20—H20    | 120.5        | C42—C43—H43     | 120.5        |
| C19—C20—H20    | 120.5        | C44—C43—H43     | 120.5        |
| N2—C21—C20     | 122.5 (2)    | N4—C44—C43      | 122.7 (2)    |
| N2—C21—H21     | 118.7        | N4—C44—H44      | 118.6        |
| C20—C21—H21    | 118.7        | C43—C44—H44     | 118.6        |
| O1—C22—Ru1     | 177.1 (2)    | O3—C45—Ru2      | 176.5 (2)    |
| O2—C23—Ru1     | 177.4 (2)    | O4—C46—Ru2      | 175.4 (2)    |
| C23—Ru1—N1—C1  | 85.59 (18)   | C46—Ru2—N3—C24  | -84.31 (19)  |
| C11—Ru1—N1—C1  | 176.91 (18)  | C34—Ru2—N3—C24  | -176.74 (19) |
| N2—Ru1—N1—C1   | -93.29 (17)  | N4—Ru2—N3—C24   | 93.64 (18)   |
| Cl1—Ru1—N1—C1  | -5.33 (17)   | Cl2—Ru2—N3—C24  | 6.14 (18)    |
| C23—Ru1—N1—C5  | -93.20 (15)  | C46—Ru2—N3—C28  | 93.39 (16)   |
| C11—Ru1—N1—C5  | -1.88 (14)   | C34—Ru2—N3—C28  | 0.96 (15)    |
| N2—Ru1—N1—C5   | 87.92 (14)   | N4—Ru2—N3—C28   | -88.66 (15)  |
| Cl1—Ru1—N1—C5  | 175.88 (13)  | Cl2—Ru2—N3—C28  | -176.16 (14) |
| C22—Ru1—N2—C21 | -136.21 (17) | C45—Ru2—N4—C44  | 132.99 (18)  |
| C11—Ru1—N2—C21 | 129.67 (16)  | C34—Ru2—N4—C44  | -132.87 (17) |
| N1—Ru1—N2—C21  | 50.48 (16)   | N3—Ru2—N4—C44   | -53.66 (17)  |
| Cl1—Ru1—N2—C21 | -43.56 (15)  | Cl2—Ru2—N4—C44  | 40.25 (16)   |
| C22—Ru1—N2—C17 | 44.31 (17)   | C45—Ru2—N4—C40  | -48.08 (17)  |
| C11—Ru1—N2—C17 | -49.81 (16)  | C34—Ru2—N4—C40  | 46.07 (17)   |
| N1—Ru1—N2—C17  | -129.00 (16) | N3—Ru2—N4—C40   | 125.28 (17)  |
| Cl1—Ru1—N2—C17 | 136.96 (16)  | Cl2—Ru2—N4—C40  | -140.81 (16) |
| C5—N1—C1—C2    | 0.9 (3)      | C28—N3—C24—C25  | 0.3 (3)      |
| Ru1—N1—C1—C2   | -177.85 (16) | Ru2—N3—C24—C25  | 177.96 (18)  |
| N1—C1—C2—C3    | -0.5 (3)     | N3—C24—C25—C26  | 0.1 (4)      |
| C1—C2—C3—C4    | -0.8 (3)     | C24—C25—C26—C27 | 0.1 (4)      |
| C1—C2—C3—C12   | 177.1 (2)    | C24—C25—C26—C35 | -178.9 (2)   |

|                 |              |                 |              |
|-----------------|--------------|-----------------|--------------|
| C2—C3—C4—C5     | 1.7 (3)      | C25—C26—C27—C28 | -0.7 (3)     |
| C12—C3—C4—C5    | -176.2 (2)   | C35—C26—C27—C28 | 178.2 (2)    |
| C1—N1—C5—C4     | 0.0 (3)      | C24—N3—C28—C27  | -1.0 (3)     |
| Ru1—N1—C5—C4    | 178.87 (15)  | Ru2—N3—C28—C27  | -178.83 (16) |
| C1—N1—C5—C6     | -177.71 (18) | C24—N3—C28—C29  | 177.76 (18)  |
| Ru1—N1—C5—C6    | 1.2 (2)      | Ru2—N3—C28—C29  | -0.1 (2)     |
| C3—C4—C5—N1     | -1.3 (3)     | C26—C27—C28—N3  | 1.2 (3)      |
| C3—C4—C5—C6     | 176.14 (19)  | C26—C27—C28—C29 | -177.4 (2)   |
| N1—C5—C6—C7     | 178.72 (19)  | N3—C28—C29—C30  | 179.44 (19)  |
| C4—C5—C6—C7     | 1.1 (3)      | C27—C28—C29—C30 | -1.9 (3)     |
| N1—C5—C6—C11    | 0.7 (3)      | N3—C28—C29—C34  | -1.3 (3)     |
| C4—C5—C6—C11    | -176.86 (19) | C27—C28—C29—C34 | 177.3 (2)    |
| C11—C6—C7—C8    | 1.7 (3)      | C34—C29—C30—C31 | 0.1 (3)      |
| C5—C6—C7—C8     | -176.2 (2)   | C28—C29—C30—C31 | 179.3 (2)    |
| C6—C7—C8—C9     | -0.5 (3)     | C29—C30—C31—C32 | -0.1 (3)     |
| C7—C8—C9—C10    | -1.6 (3)     | C30—C31—C32—C33 | 0.4 (3)      |
| C7—C8—C9—C16    | 176.0 (2)    | C30—C31—C32—C39 | -179.0 (2)   |
| C8—C9—C10—C11   | 2.7 (3)      | C31—C32—C33—C34 | -0.5 (3)     |
| C16—C9—C10—C11  | -175.0 (2)   | C39—C32—C33—C34 | 178.8 (2)    |
| C9—C10—C11—C6   | -1.5 (3)     | C32—C33—C34—C29 | 0.5 (3)      |
| C9—C10—C11—Ru1  | 178.12 (16)  | C32—C33—C34—Ru2 | 178.59 (16)  |
| C7—C6—C11—C10   | -0.7 (3)     | C30—C29—C34—C33 | -0.2 (3)     |
| C5—C6—C11—C10   | 177.35 (18)  | C28—C29—C34—C33 | -179.48 (19) |
| C7—C6—C11—Ru1   | 179.64 (15)  | C30—C29—C34—Ru2 | -178.61 (16) |
| C5—C6—C11—Ru1   | -2.3 (2)     | C28—C29—C34—Ru2 | 2.1 (2)      |
| C23—Ru1—C11—C10 | -87.5 (2)    | C46—Ru2—C34—C33 | 92.1 (2)     |
| C22—Ru1—C11—C10 | 3.7 (2)      | C45—Ru2—C34—C33 | 1.0 (2)      |
| N1—Ru1—C11—C10  | -177.4 (2)   | N3—Ru2—C34—C33  | -179.8 (2)   |
| N2—Ru1—C11—C10  | 96.49 (19)   | N4—Ru2—C34—C33  | -92.96 (19)  |
| C23—Ru1—C11—C6  | 92.15 (16)   | C46—Ru2—C34—C29 | -89.75 (16)  |
| C22—Ru1—C11—C6  | -176.65 (16) | C45—Ru2—C34—C29 | 179.21 (16)  |
| N1—Ru1—C11—C6   | 2.20 (14)    | N3—Ru2—C34—C29  | -1.63 (14)   |



|                 |              |                 |              |
|-----------------|--------------|-----------------|--------------|
| N2—Ru1—C11—C6   | -83.88 (15)  | N4—Ru2—C34—C29  | 85.23 (15)   |
| C4—C3—C12—C14   | 110.6 (3)    | C27—C26—C35—C38 | 4.7 (3)      |
| C2—C3—C12—C14   | -67.2 (3)    | C25—C26—C35—C38 | -176.4 (2)   |
| C4—C3—C12—C13   | -129.0 (3)   | C27—C26—C35—C37 | -115.6 (3)   |
| C2—C3—C12—C13   | 53.2 (3)     | C25—C26—C35—C37 | 63.3 (3)     |
| C4—C3—C12—C15   | -9.0 (3)     | C27—C26—C35—C36 | 124.2 (3)    |
| C2—C3—C12—C15   | 173.2 (2)    | C25—C26—C35—C36 | -56.9 (3)    |
| C21—N2—C17—C18  | -0.5 (3)     | C44—N4—C40—C41  | 1.2 (3)      |
| Ru1—N2—C17—C18  | 179.01 (17)  | Ru2—N4—C40—C41  | -177.75 (17) |
| N2—C17—C18—C19  | -0.4 (3)     | N4—C40—C41—C42  | -0.7 (4)     |
| C17—C18—C19—C20 | 0.2 (4)      | C40—C41—C42—C43 | 0.3 (4)      |
| C18—C19—C20—C21 | 0.8 (4)      | C41—C42—C43—C44 | -0.4 (4)     |
| C17—N2—C21—C20  | 1.5 (3)      | C40—N4—C44—C43  | -1.3 (3)     |
| Ru1—N2—C21—C20  | -177.97 (18) | Ru2—N4—C44—C43  | 177.64 (19)  |
| C19—C20—C21—N2  | -1.7 (4)     | C42—C43—C44—N4  | 1.0 (4)      |

#### Computing details

Data collection: Bruker APEX2; cell refinement: Bruker SAINT; data reduction: Bruker SAINT; program(s) used to solve structure: SHELXS97 (Sheldrick, 2008); program(s) used to refine structure: SHELXL97 (Sheldrick, 1997); molecular graphics: Bruker SHELXTL; software used to prepare material for publication: Bruker SHELXTL.

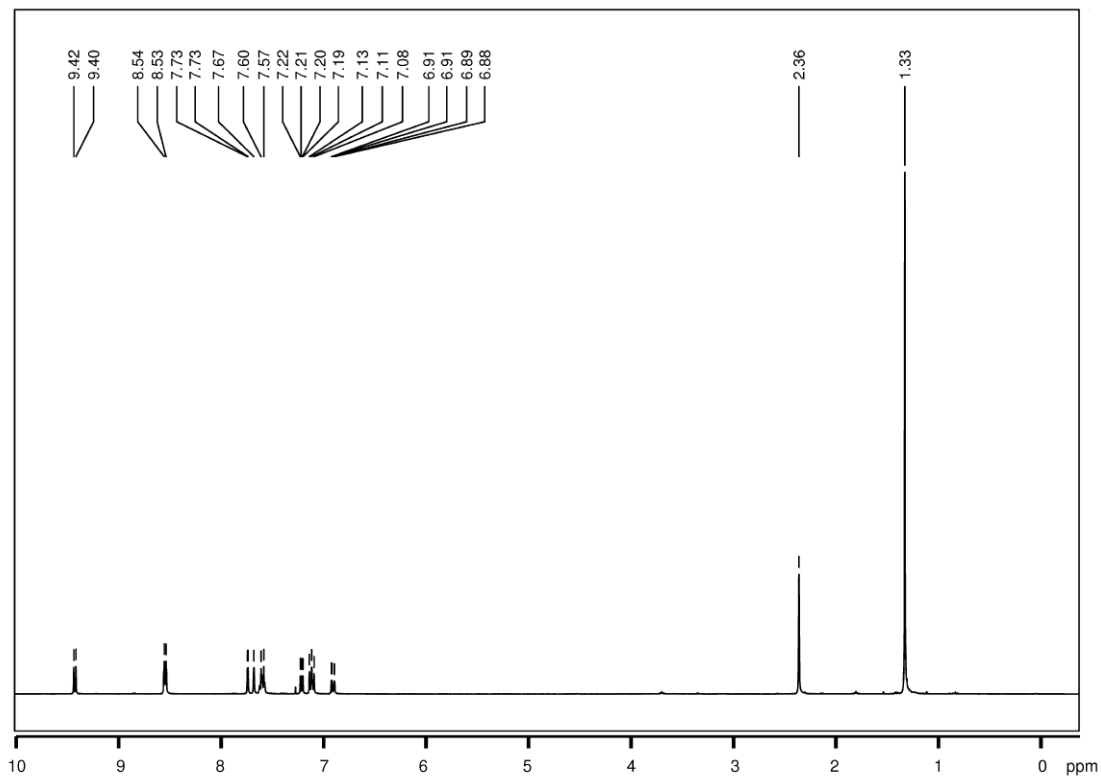

**Figure S1.**  $^1\text{H}$  NMR spectrum of complex **7** in  $\text{CDCl}_3$

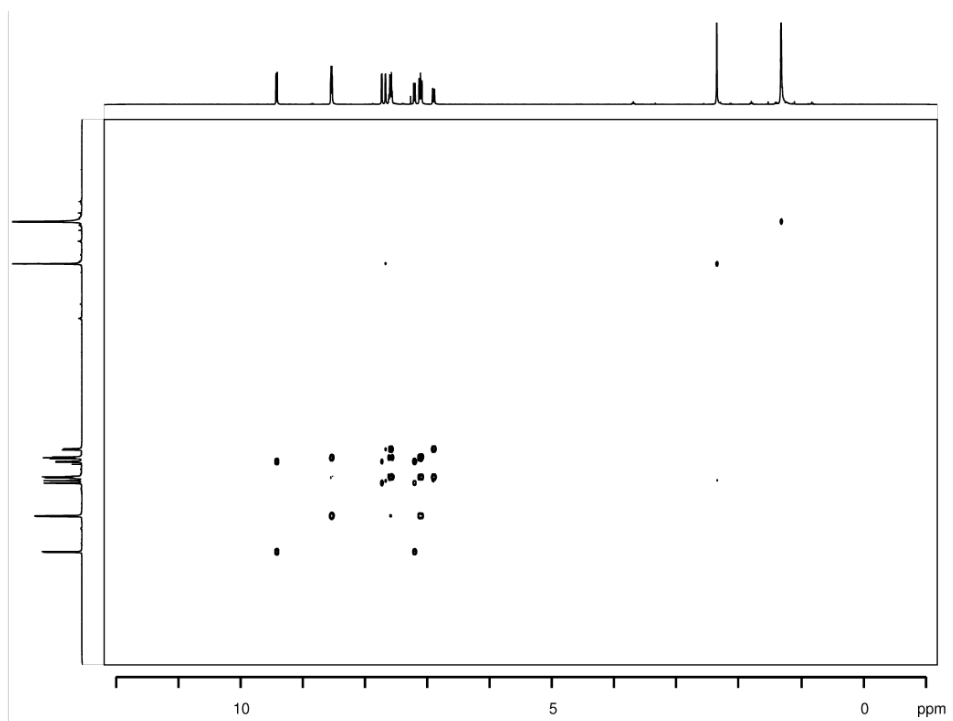

**Figure S2.** COSY ( $^1\text{H}$ ) spectrum of complex **7** in  $\text{CDCl}_3$

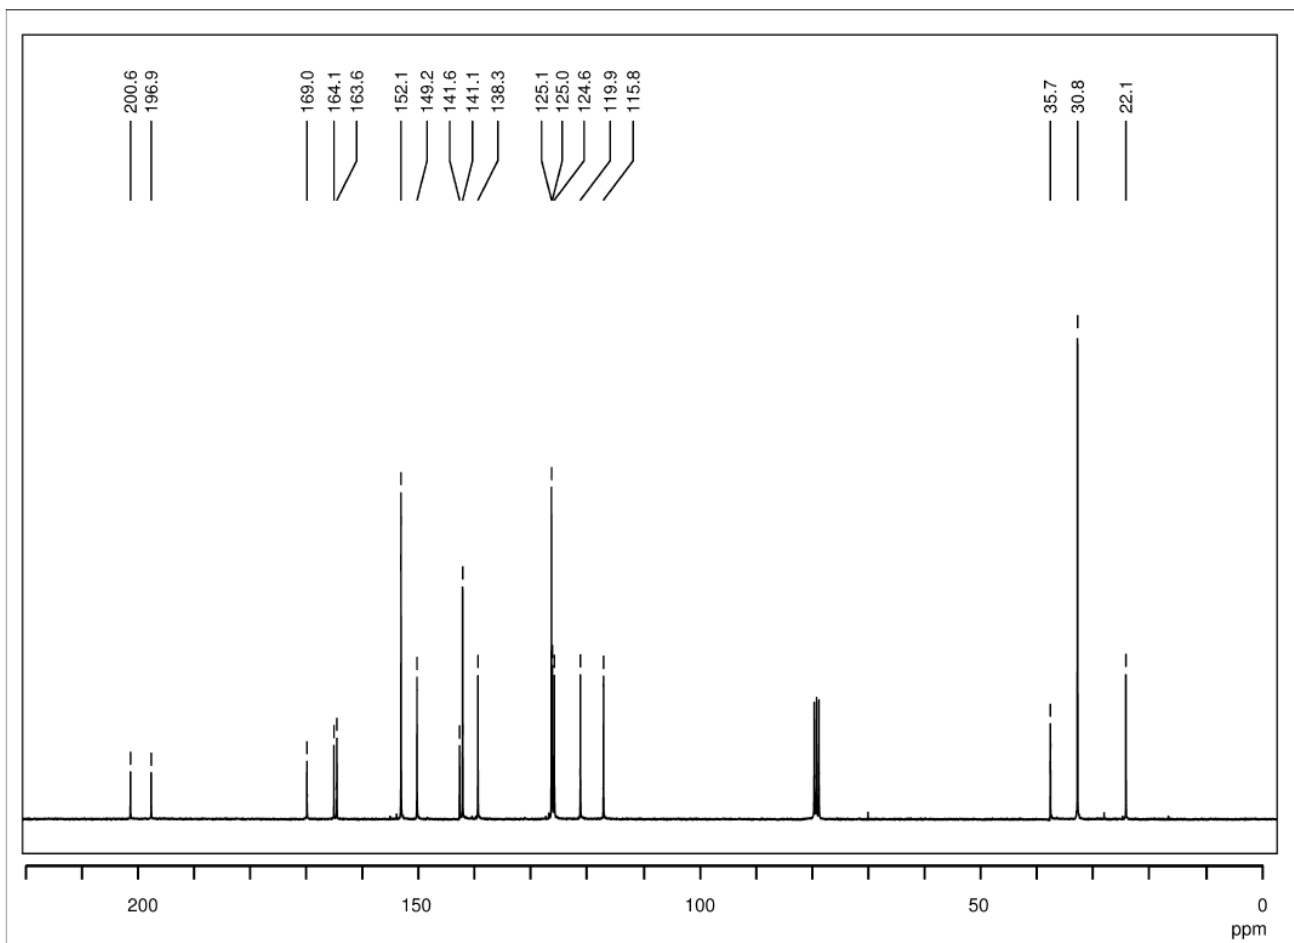

**Figure S3.**  $^{13}\text{C}\{^1\text{H}\}$  NMR spectrum of complex 7

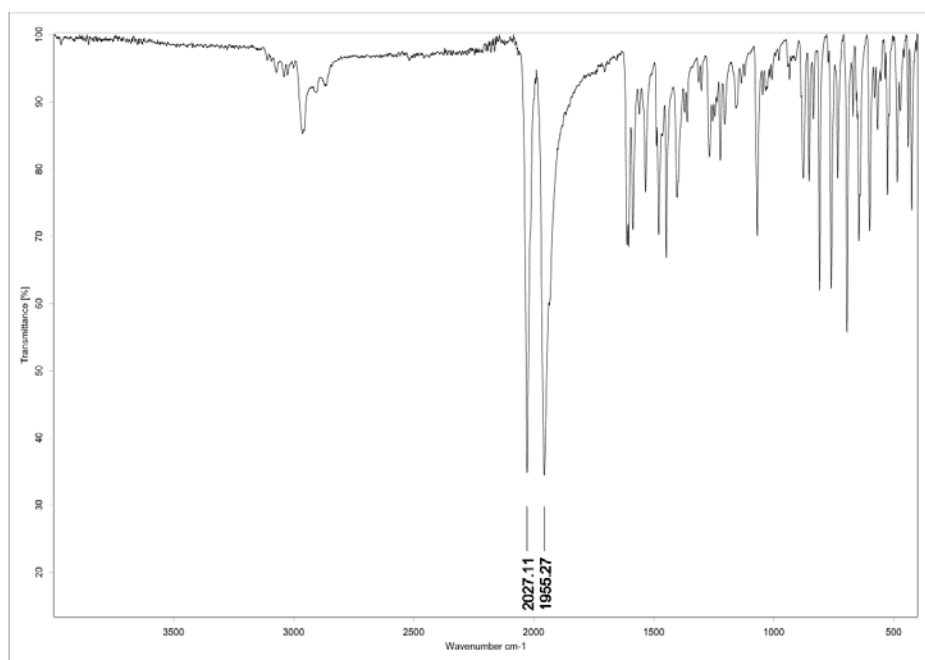

**Figure S4.** Solid state IR spectrum of complex 7 (ATR)

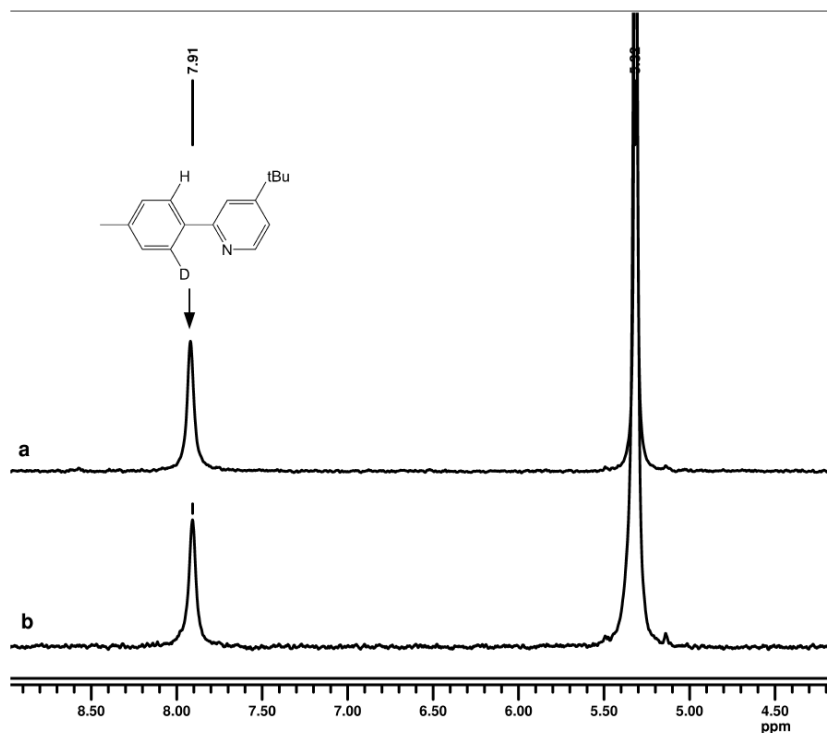

**Figure S5.**  $^2\text{H}\{^1\text{H}\}$  NMR spectra (in  $\text{CH}_2\text{Cl}_2$ , locked on  $^{19}\text{F}$   $\text{C}_6\text{F}_6$ , internal reference  $\text{CD}_2\text{Cl}_2$ ) of the ligand **9** (2-(*p*-tolyl)-4-tertbutylpyridine) after reaction of complex **1** in THF with a)  $\text{ND}_3\text{BH}_3$  and b)  $\text{NH}_3\text{BD}_3$

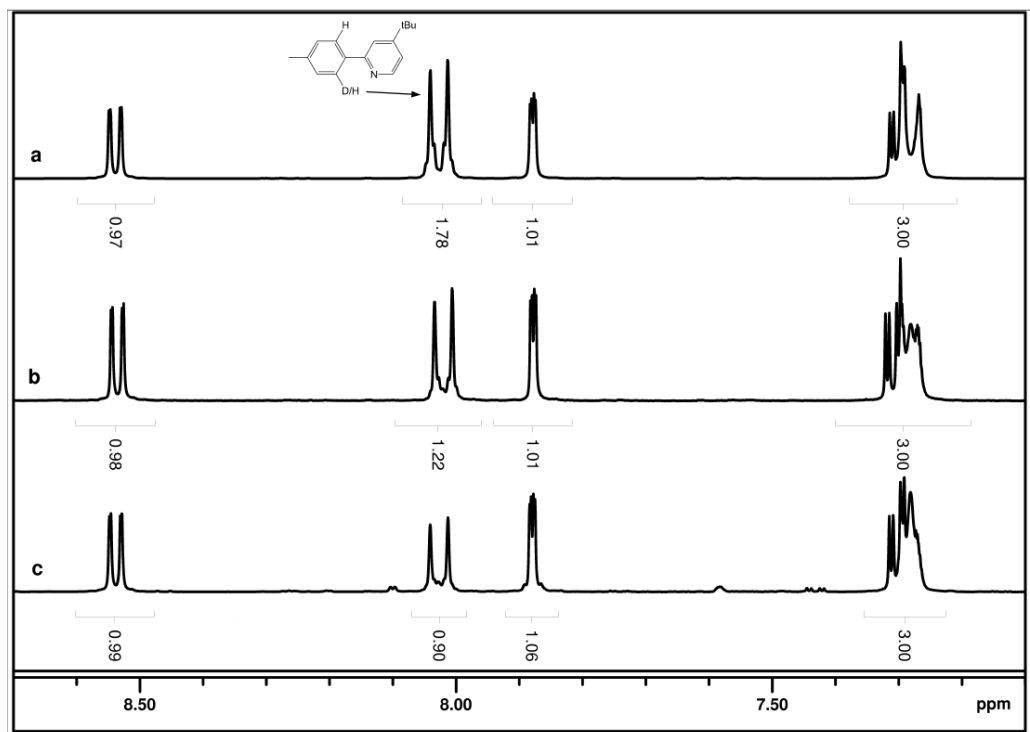

**Figure S6.**  $^1\text{H}$  NMR spectra (in  $d_6$ -acetone) of the partially deuterated ligand **9** after reaction of complex **1** in THF with a)  $\text{ND}_3\text{BH}_3$ , b)  $\text{NH}_3\text{BD}_3$  and c)  $\text{ND}_3\text{BD}_3$

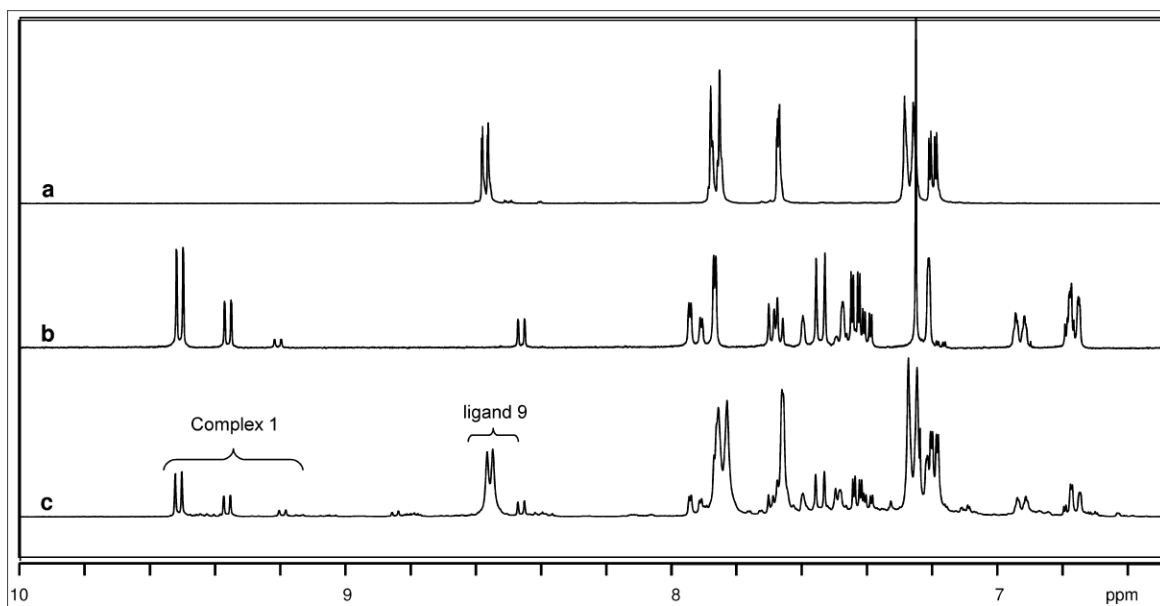

**Figure S7.**  $^1\text{H}$  NMR spectra of a) ligand **9**, b) pure complex **1** and c) the reaction of complex **1** with LiEt<sub>3</sub>BH and ligand **9**.

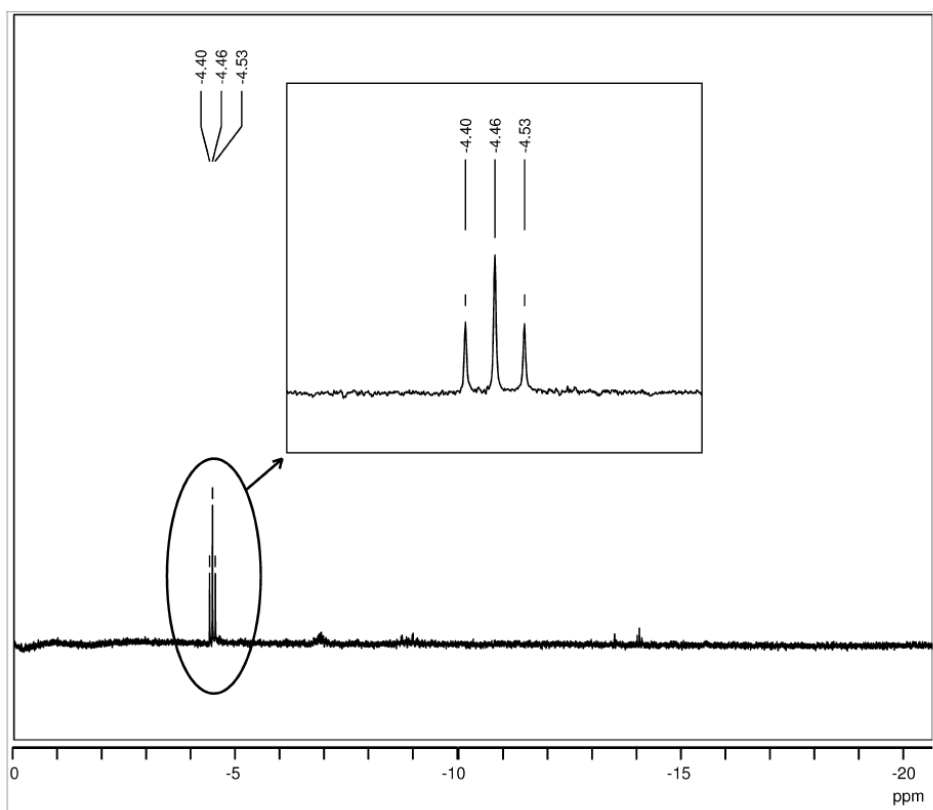

**Figure S8.**  $^1\text{H}$  NMR spectrum in the hydrido region of Ru(CO)<sub>2</sub>(PPh<sub>3</sub>)<sub>2</sub>ClH

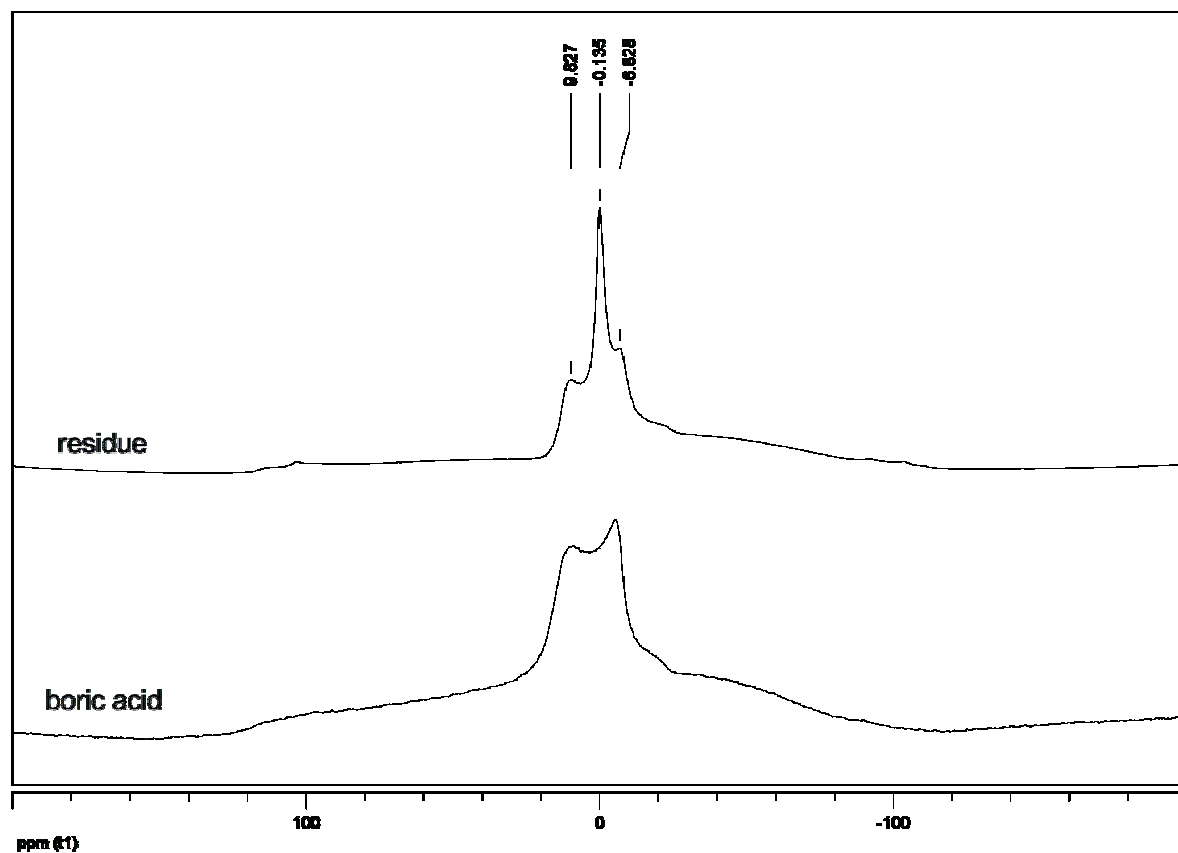

**Figure S9.** Magic Angle Spinning  $^{11}\text{B}$  NMR spectrum of the off-white solid residue (above) and the spectrum of boric acid  $\text{B}(\text{OH})_3$  (below).

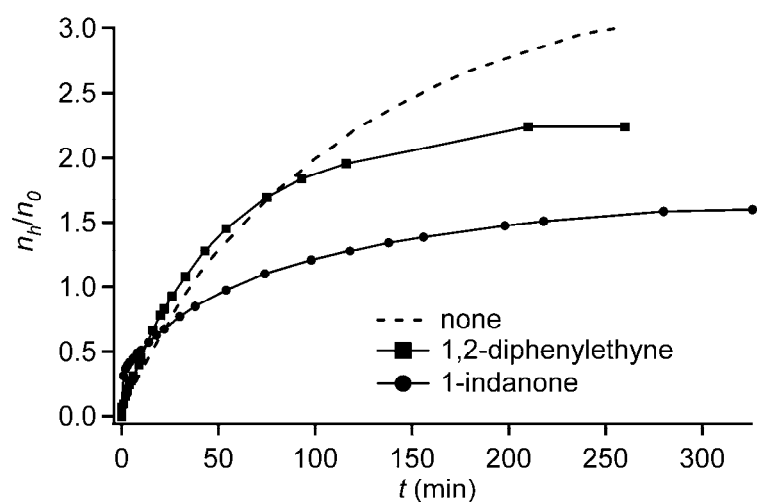

**Fig. 10** Inhibition of the production of  $\text{H}_2$  by notorious hydrogen acceptors such as 1,2-diphenylethyne (■) and 1-indanone (●).

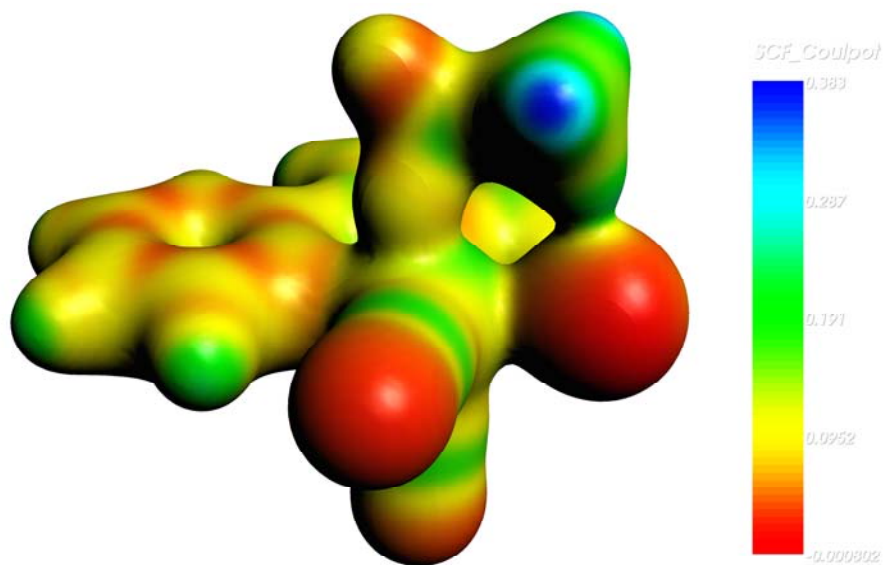

**Figure S11.** Coulombic map (bar graph in a.u.) drawn over the isosurface of the SCF electron density ( $0.030 \text{ e/bohr}^3$ ) for conformer **A1**.

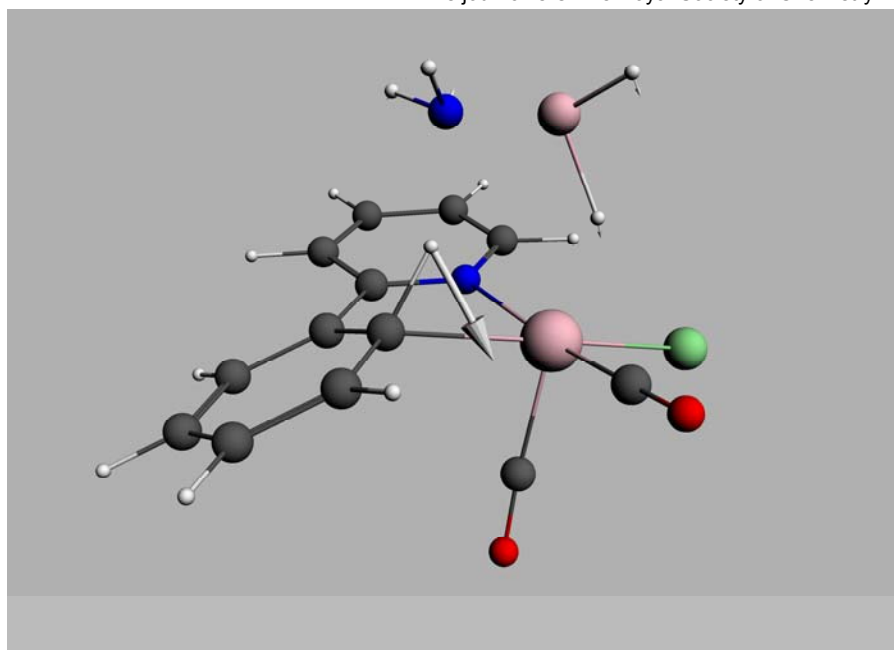

**Figure S12.** Displacement vectors for **TS1** in the gas phase showing the direction of the imaginary vibrational mode.

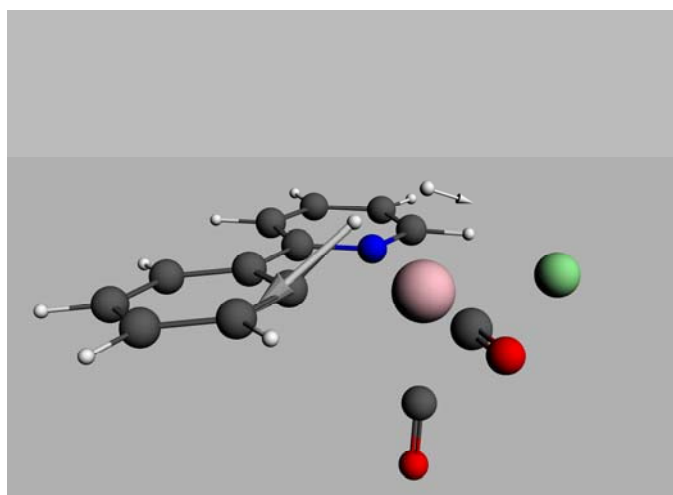

**Figure S13.** Displacement vectors for **TS2** in the gas phase showing the direction of the imaginary vibrational mode.



Computational data (BP86-D/TZP (ZORA)): Cartesian coordinates, energies and vibrational modes.

*Gas Phase*

NH<sub>3</sub>BH<sub>3</sub>

Geometry CYCLE 4  
 =====

Energy gradients wrt nuclear displacements  
 =====

| Atom | Cartesian (a.u./angstrom) |           |           |
|------|---------------------------|-----------|-----------|
|      | X                         | Y         | Z         |
| 1 N  | -0.000065                 | -0.000604 | -0.000002 |
| 2 H  | 0.000019                  | -0.000032 | 0.000419  |
| 3 H  | 0.000021                  | -0.000025 | 0.000058  |
| 4 H  | 0.000032                  | 0.000213  | -0.000126 |
| 5 B  | 0.000209                  | 0.000338  | -0.000525 |
| 6 H  | -0.000101                 | 0.000114  | 0.000005  |
| 7 H  | -0.000081                 | 0.000040  | 0.000120  |
| 8 H  | -0.000034                 | -0.000044 | 0.000052  |

-----  
 Geometry Convergence after Step 4  
 -----

|                          |            |                     |   |
|--------------------------|------------|---------------------|---|
| current energy           |            | -1.34142056 Hartree |   |
| abs of energy change     | 0.00000804 | 0.00100000          | T |
| constrained gradient max | 0.00060363 | 0.00100000          | T |
| constrained gradient rms | 0.00021376 | 0.00066667          | T |
| gradient max             | 0.00060363 |                     |   |
| gradient rms             | 0.00021376 |                     |   |
| cart. step max           | 0.00804663 | 0.01000000          | T |
| cart. step rms           | 0.00280078 | 0.00666667          | T |

|                                                                 | hartree            | eV        | kcal/mol | kJ/mol    |
|-----------------------------------------------------------------|--------------------|-----------|----------|-----------|
|                                                                 | -----              | -----     | -----    | -----     |
| <b>Pauli Repulsion</b>                                          |                    |           |          |           |
| Kinetic (Delta T^0):                                            | 9.475363101412809  | 257.8377  | 5945.88  | 24877.56  |
| Delta V^Pauli Coulomb:                                          | -4.244486946053502 | -115.4984 | -2663.46 | -11143.90 |
| Delta V^Pauli LDA-XC:                                           | -1.329331157064725 | -36.1729  | -834.17  | -3490.16  |
| Delta V^Pauli GGA-Exchange:                                     | 0.059695812782594  | 1.6244    | 37.46    | 156.73    |
| Delta V^Pauli GGA-Correlation:                                  | -0.013815718520040 | -0.3759   | -8.67    | -36.27    |
| -----                                                           |                    |           |          |           |
| Total Pauli Repulsion:                                          | 3.947425092557136  | 107.4149  | 2477.05  | 10363.96  |
| (Total Pauli Repulsion =<br>Delta E^Pauli in the BB paper)      |                    |           |          |           |
| <b>Steric Interaction</b>                                       |                    |           |          |           |
| Pauli Repulsion (Delta E^Pauli):                                | 3.947425092557136  | 107.4149  | 2477.05  | 10363.96  |
| Electrostatic Interaction:                                      | -0.669881778438920 | -18.2284  | -420.36  | -1758.77  |
| (Electrostatic Interaction =<br>Delta V_elstat in the BB paper) |                    |           |          |           |
| -----                                                           |                    |           |          |           |
| Total Steric Interaction:                                       | 3.277543314118216  | 89.1865   | 2056.69  | 8605.19   |
| (Total Steric Interaction =<br>Delta E^0 in the BB paper)       |                    |           |          |           |
| <b>Orbital Interactions</b>                                     |                    |           |          |           |
| A:                                                              | -4.613973735726518 | -125.5526 | -2895.31 | -12113.99 |
| -----                                                           |                    |           |          |           |
| Total Orbital Interactions:                                     | -4.614202057258072 | -125.5588 | -2895.46 | -12114.59 |
| <b>Alternative Decomposition Orb.Int.</b>                       |                    |           |          |           |
| Kinetic:                                                        | -8.240635362366771 | -224.2391 | -5171.08 | -21635.79 |
| Coulomb:                                                        | 3.509859504204933  | 95.5081   | 2202.47  | 9215.13   |
| XC:                                                             | 0.116573800903766  | 3.1721    | 73.15    | 306.06    |
| -----                                                           |                    |           |          |           |
| Total Orbital Interactions:                                     | -4.614202057258072 | -125.5588 | -2895.46 | -12114.59 |
| Residu (E=Steric+OrbInt+Res):                                   | 0.000000073359140  | 0.0000    | 0.00     | 0.00      |
| Dispersion Energy:                                              | -0.004767002071385 | -0.1297   | -2.99    | -12.52    |
| Total Bonding Energy:                                           | -1.341425671852101 | -36.5020  | -841.76  | -3521.91  |

Summary of Bonding Energy (energy terms are taken from the energy decomposition above)  
 =====

|                                 |                    |          |         |          |
|---------------------------------|--------------------|----------|---------|----------|
| Electrostatic Energy:           | -0.669881778438920 | -18.2284 | -420.36 | -1758.77 |
| Kinetic Energy:                 | 1.234727739046038  | 33.5987  | 774.80  | 3241.78  |
| Coulomb (Steric+OrbInt) Energy: | -0.734627368489428 | -19.9902 | -460.99 | -1928.76 |
| XC Energy:                      | -1.166877261898406 | -31.7523 | -732.23 | -3063.64 |

Electronic Supplementary Information for Dalton Transactions  
 This journal is © The Royal Society of Chemistry 2010

|                       |                    |          |         |          |
|-----------------------|--------------------|----------|---------|----------|
| Dispersion Energy:    | -0.004767002071385 | -0.1297  | -2.99   | -12.52   |
| Total Bonding Energy: | -1.341425671852102 | -36.5020 | -841.76 | -3521.91 |

F R A G M E N T E N E R G Y T E R M S \*\*\* (summed over all fragments) \*\*\*

The energy terms below are (parts of) the Total Energy of the fragments from which the molecule is built.

|                          |                     |           |          |           |
|--------------------------|---------------------|-----------|----------|-----------|
| Exchange and Correlation |                     |           |          |           |
| Exchange LDA:            | -10.155392089080674 | -276.3423 | -6372.61 | -26662.98 |
| Exchange GGA:            | -1.418171653554853  | -38.5904  | -889.92  | -3723.41  |
| Correlation LDA:         | -0.992813018429513  | -27.0158  | -623.00  | -2606.63  |
| Correlation GGA:         | 0.540447948412429   | 14.7063   | 339.14   | 1418.95   |
| Total XC:                | -12.025928812652612 | -327.2422 | -7546.39 | -31574.07 |

Intensities  
 =====

| Frequency<br>cm-1 | Dipole Strength<br>1e-40 esu2 cm2 | Absorption Intensity (degeneracy not counted)<br>km/mole |
|-------------------|-----------------------------------|----------------------------------------------------------|
| 250.669286        | 0.006631                          | 0.000417                                                 |
| 606.374899        | 8.561525                          | 1.301279                                                 |
| 607.655663        | 8.626302                          | 1.313894                                                 |
| 619.891690        | 64.507785                         | 10.023191                                                |
| 1032.411967       | 104.062932                        | 26.929430                                                |
| 1033.185027       | 104.325374                        | 27.017560                                                |
| 1152.320646       | 463.522568                        | 133.882033                                               |
| 1171.042437       | 14.690612                         | 4.312118                                                 |
| 1171.306193       | 15.614433                         | 4.584318                                                 |
| 1282.323884       | 264.205148                        | 84.921387                                                |
| 1617.099743       | 57.790232                         | 23.424445                                                |
| 1617.921136       | 57.176931                         | 23.187624                                                |
| 2416.357490       | 85.480265                         | 51.773213                                                |
| 2437.187610       | 386.635944                        | 236.194216                                               |
| 2439.443343       | 386.061399                        | 236.061513                                               |
| 3341.955033       | 0.551385                          | 0.461885                                                 |
| 3452.942519       | 34.251964                         | 29.645099                                                |
| 3453.497434       | 34.495823                         | 29.860957                                                |

Zero-Point Energy : 0.067670 a.u.  
 =====  
 1.841388 eV

NH2BH2

Geometry CYCLE 7  
 =====

Energy gradients wrt nuclear displacements  
 =====

| Atom | Cartesian (a.u./angstrom) |           |           |
|------|---------------------------|-----------|-----------|
|      | X                         | Y         | Z         |
| 1 N  | -0.000184                 | -0.000414 | -0.000236 |
| 2 H  | 0.000147                  | 0.000074  | 0.000137  |
| 3 H  | -0.000054                 | 0.000189  | 0.000086  |
| 4 B  | 0.000163                  | 0.000206  | -0.000006 |
| 5 H  | -0.000089                 | 0.000001  | -0.000001 |
| 6 H  | 0.000016                  | -0.000056 | 0.000018  |

-----  
 Geometry Convergence after Step 7  
 -----

|                          |            |                     |   |  |
|--------------------------|------------|---------------------|---|--|
| current energy           |            | -1.09202318 Hartree |   |  |
| abs of energy change     | 0.00001186 | 0.00100000          | T |  |
| constrained gradient max | 0.00041409 | 0.00100000          | T |  |
| constrained gradient rms | 0.00015524 | 0.00066667          | T |  |
| gradient max             | 0.00041409 |                     |   |  |
| gradient rms             | 0.00015524 |                     |   |  |
| cart. step max           | 0.00019249 | 0.01000000          | T |  |
| cart. step rms           | 0.00010776 | 0.00666667          | T |  |

|                                                                                               | hartree                   | eV               | kcal/mol        | kJ/mol           |
|-----------------------------------------------------------------------------------------------|---------------------------|------------------|-----------------|------------------|
|                                                                                               | -----                     | -----            | -----           | -----            |
| <b>Pauli Repulsion</b>                                                                        |                           |                  |                 |                  |
| Kinetic (Delta T^0):                                                                          | 8.330865559202879         | 226.6944         | 5227.70         | 21872.68         |
| Delta V^Pauli Coulomb:                                                                        | -3.786877152067238        | -103.0462        | -2376.30        | -9942.44         |
| Delta V^Pauli LDA-XC:                                                                         | -1.104940156426055        | -30.0670         | -693.36         | -2901.02         |
| Delta V^Pauli GGA-Exchange:                                                                   | 0.042996678775991         | 1.1700           | 26.98           | 112.89           |
| Delta V^Pauli GGA-Correlation:                                                                | -0.007728236534039        | -0.2103          | -4.85           | -20.29           |
| <b>Total Pauli Repulsion:</b>                                                                 | <b>3.474316692951537</b>  | <b>94.5410</b>   | <b>2180.17</b>  | <b>9121.82</b>   |
| (Total Pauli Repulsion =<br>Delta E^Pauli in the BB paper)                                    |                           |                  |                 |                  |
| <b>Steric Interaction</b>                                                                     |                           |                  |                 |                  |
| Pauli Repulsion (Delta E^Pauli):                                                              | 3.474316692951537         | 94.5410          | 2180.17         | 9121.82          |
| Electrostatic Interaction:                                                                    | -0.582264715648477        | -15.8442         | -365.38         | -1528.74         |
| (Electrostatic Interaction =<br>Delta V_elstat in the BB paper)                               |                           |                  |                 |                  |
| <b>Total Steric Interaction:</b>                                                              | <b>2.892051977303060</b>  | <b>78.6967</b>   | <b>1814.79</b>  | <b>7593.08</b>   |
| (Total Steric Interaction =<br>Delta E^0 in the BB paper)                                     |                           |                  |                 |                  |
| <b>Orbital Interactions</b>                                                                   |                           |                  |                 |                  |
| A:                                                                                            | -3.980991805861237        | -108.3283        | -2498.11        | -10452.09        |
| <b>Total Orbital Interactions:</b>                                                            | <b>-3.982099875130255</b> | <b>-108.3585</b> | <b>-2498.81</b> | <b>-10455.00</b> |
| <b>Alternative Decomposition Orb.Int.</b>                                                     |                           |                  |                 |                  |
| Kinetic:                                                                                      | -7.322187980673743        | -199.2469        | -4594.74        | -19224.40        |
| Coulomb:                                                                                      | 3.222568404270911         | 87.6905          | 2022.19         | 8460.85          |
| XC:                                                                                           | 0.117519701272575         | 3.1979           | 73.74           | 308.55           |
| <b>Total Orbital Interactions:</b>                                                            | <b>-3.982099875130257</b> | <b>-108.3585</b> | <b>-2498.81</b> | <b>-10455.00</b> |
| Residu (E=Steric+OrbInt+Res):                                                                 | 0.000000123990338         | 0.0000           | 0.00            | 0.00             |
| Dispersion Energy:                                                                            | -0.001975807134409        | -0.0538          | -1.24           | -5.19            |
| <b>Total Bonding Energy:</b>                                                                  | <b>-1.092023580971266</b> | <b>-29.7155</b>  | <b>-685.26</b>  | <b>-2867.11</b>  |
| <b>Summary of Bonding Energy (energy terms are taken from the energy decomposition above)</b> |                           |                  |                 |                  |
| Electrostatic Energy:                                                                         | -0.582264715648477        | -15.8442         | -365.38         | -1528.74         |
| Kinetic Energy:                                                                               | 1.008677578529136         | 27.4475          | 632.95          | 2648.28          |
| Coulomb (Steric+OrbInt) Energy:                                                               | -0.564308623805989        | -15.3556         | -354.11         | -1481.59         |
| XC Energy:                                                                                    | -0.952152012911528        | -25.9094         | -597.48         | -2499.87         |
| Dispersion Energy:                                                                            | -0.001975807134409        | -0.0538          | -1.24           | -5.19            |
| <b>Total Bonding Energy:</b>                                                                  | <b>-1.092023580971266</b> | <b>-29.7155</b>  | <b>-685.26</b>  | <b>-2867.11</b>  |

F R A G M E N T   E N E R G Y   T E R M S   \*\*\* (summed over all fragments) \*\*\*

The energy terms below are (parts of) the Total Energy of the fragments from which the molecule is built.

Exchange and Correlation

|                  |                     |           |          |           |
|------------------|---------------------|-----------|----------|-----------|
| Exchange LDA:    | -9.758673086480334  | -265.5470 | -6123.66 | -25621.39 |
| Exchange GGA:    | -1.330697359523562  | -36.2101  | -835.03  | -3493.75  |
| Correlation LDA: | -0.912973364820409  | -24.8433  | -572.90  | -2397.01  |
| Correlation GGA: | 0.492780474387309   | 13.4092   | 309.22   | 1293.79   |
| -----            |                     |           |          |           |
| Total XC:        | -11.509563336436996 | -313.1912 | -7222.36 | -30218.35 |

Intensities

=====

| Frequency<br>cm-1 | Dipole Strength<br>1e-40 esu2 cm2 | Absorption Intensity (degeneracy not counted)<br>km/mole |
|-------------------|-----------------------------------|----------------------------------------------------------|
| -----             | -----                             | -----                                                    |
| 590.376991        | 1054.400821                       | 156.031840                                               |
| 710.011066        | 0.640427                          | 0.113976                                                 |
| 842.338362        | 0.011383                          | 0.002403                                                 |
| 971.208898        | 85.840138                         | 20.896865                                                |
| 1098.654340       | 115.192303                        | 31.722150                                                |
| 1119.385973       | 1.746262                          | 0.489968                                                 |
| 1317.917496       | 158.210305                        | 52.263810                                                |
| 1586.633385       | 170.620150                        | 67.855488                                                |
| 2528.118534       | 131.140351                        | 83.102070                                                |
| 2587.737211       | 234.978067                        | 152.414248                                               |
| 3473.369455       | 18.626334                         | 16.216474                                                |
| 3572.492492       | 29.325987                         | 26.260442                                                |

Zero-Point Energy :      0.046471 a.u.  
=====                    1.264530 eV

THF

Geometry CYCLE 5  
 =====

Energy gradients wrt nuclear displacements  
 =====

| Atom | Cartesian (a.u./angstrom) |           |           |
|------|---------------------------|-----------|-----------|
|      | X                         | Y         | Z         |
| 1 O  | -0.000047                 | 0.000385  | -0.000079 |
| 2 C  | 0.000007                  | 0.000089  | 0.000231  |
| 3 C  | -0.000240                 | -0.000413 | -0.000265 |
| 4 C  | 0.000575                  | -0.000117 | -0.000043 |
| 5 C  | -0.000261                 | 0.000020  | 0.000197  |
| 6 H  | 0.000013                  | -0.000055 | -0.000066 |
| 7 H  | 0.000002                  | 0.000014  | -0.000057 |
| 8 H  | -0.000008                 | 0.000090  | 0.000042  |
| 9 H  | 0.000011                  | -0.000021 | 0.000059  |
| 10 H | -0.000083                 | -0.000002 | 0.000037  |
| 11 H | -0.000016                 | 0.000024  | 0.000083  |
| 12 H | 0.000022                  | 0.000038  | -0.000050 |
| 13 H | 0.000025                  | -0.000051 | -0.000089 |

-----  
 Geometry Convergence after Step 5  
 -----

|                                                                 |                     |                     |           |           |
|-----------------------------------------------------------------|---------------------|---------------------|-----------|-----------|
| current energy                                                  |                     | -2.61277822 Hartree |           |           |
| abs of energy change                                            | 0.00000365          | 0.00100000          | T         |           |
| constrained gradient max                                        | 0.00057514          | 0.00100000          | T         |           |
| constrained gradient rms                                        | 0.00016224          | 0.00066667          | T         |           |
| gradient max                                                    | 0.00057514          |                     |           |           |
| gradient rms                                                    | 0.00016224          |                     |           |           |
| cart. step max                                                  | 0.00090178          | 0.01000000          | T         |           |
| cart. step rms                                                  | 0.00028594          | 0.00666667          | T         |           |
|                                                                 |                     | hartree             | eV        | kcal/mol  |
|                                                                 |                     | -----               | -----     | -----     |
| <b>Pauli Repulsion</b>                                          |                     |                     |           |           |
| Kinetic (Delta T^0):                                            | 22.890281443009279  | 622.8763            | 14363.87  | 60098.43  |
| Delta V^Pauli Coulomb:                                          | -11.038243781658490 | -300.3659           | -6926.60  | -28980.90 |
| Delta V^Pauli LDA-XC:                                           | -3.101531706304075  | -84.3970            | -1946.24  | -8143.07  |
| Delta V^Pauli GGA-Exchange:                                     | 0.175555220962442   | 4.7771              | 110.16    | 460.92    |
| Delta V^Pauli GGA-Correlation:                                  | -0.048966164215446  | -1.3324             | -30.73    | -128.56   |
|                                                                 | -----               | -----               | -----     | -----     |
| Total Pauli Repulsion:                                          | 8.877095011793708   | 241.5580            | 5570.46   | 23306.81  |
| (Total Pauli Repulsion =<br>Delta E^Pauli in BB paper)          |                     |                     |           |           |
| <b>Steric Interaction</b>                                       |                     |                     |           |           |
| Pauli Repulsion (Delta E^Pauli):                                | 8.877095011793708   | 241.5580            | 5570.46   | 23306.81  |
| Electrostatic Interaction:                                      | -1.784941411517720  | -48.5707            | -1120.07  | -4686.36  |
| (Electrostatic Interaction =<br>Delta V_elstat in the BB paper) |                     |                     |           |           |
|                                                                 | -----               | -----               | -----     | -----     |
| Total Steric Interaction:                                       | 7.092153600275988   | 192.9873            | 4450.39   | 18620.45  |
| (Total Steric Interaction =<br>Delta E^0 in the BB paper)       |                     |                     |           |           |
| <b>Orbital Interactions</b>                                     |                     |                     |           |           |
| A:                                                              | -9.692871193071523  | -263.7564           | -6082.37  | -25448.63 |
|                                                                 | -----               | -----               | -----     | -----     |
| Total Orbital Interactions:                                     | -9.694441132285752  | -263.7992           | -6083.35  | -25452.75 |
| <b>Alternative Decomposition Orb.Int.</b>                       |                     |                     |           |           |
| Kinetic:                                                        | -20.473966738628711 | -557.1250           | -12847.61 | -53754.39 |
| Coulomb:                                                        | 10.164291456065923  | 276.5844            | 6378.19   | 26686.34  |
| XC:                                                             | 0.615234150277038   | 16.7414             | 386.07    | 1615.30   |
|                                                                 | -----               | -----               | -----     | -----     |
| Total Orbital Interactions:                                     | -9.694441132285750  | -263.7992           | -6083.35  | -25452.75 |
| Residu (E=Steric+OrbInt+Res):                                   | 0.000011387989756   | 0.0003              | 0.01      | 0.03      |
| Dispersion Energy:                                              | -0.010502093247352  | -0.2858             | -6.59     | -27.57    |
| Total Bonding Energy:                                           | -2.612778237267360  | -71.0973            | -1639.54  | -6859.85  |

Summary of Bonding Energy (energy terms are taken from the energy decomposition above)  
 =====

Electronic Supplementary Information for Dalton Transactions  
 This journal is © The Royal Society of Chemistry 2010

|                                 |                    |          |          |          |
|---------------------------------|--------------------|----------|----------|----------|
| Electrostatic Energy:           | -1.784941411517720 | -48.5707 | -1120.07 | -4686.36 |
| Kinetic Energy:                 | 2.416314704380568  | 65.7513  | 1516.26  | 6344.03  |
| Coulomb (Steric+OrbInt) Energy: | -0.873940937602811 | -23.7811 | -548.41  | -2294.53 |
| XC Energy:                      | -2.359708499280041 | -64.2109 | -1480.74 | -6195.41 |
| Dispersion Energy:              | -0.010502093247352 | -0.2858  | -6.59    | -27.57   |
|                                 | -----              | -----    | -----    | -----    |
| Total Bonding Energy:           | -2.612778237267356 | -71.0973 | -1639.54 | -6859.85 |

F R A G M E N T E N E R G Y T E R M S \*\*\* (summed over all fragments) \*\*\*

The energy terms below are (parts of) the Total Energy of the fragments from which the molecule is built.

|                          |                     |           |           |           |
|--------------------------|---------------------|-----------|-----------|-----------|
| Exchange and Correlation |                     |           |           |           |
| Exchange LDA:            | -26.366666276461654 | -717.4735 | -16545.33 | -69225.67 |
| Exchange GGA:            | -3.477241068681778  | -94.6205  | -2182.00  | -9129.50  |
| Correlation LDA:         | -2.361509048595487  | -64.2599  | -1481.87  | -6200.14  |
| Correlation GGA:         | 1.254069282264207   | 34.1250   | 786.94    | 3292.56   |
|                          | -----               | -----     | -----     | -----     |
| Total XC:                | -30.951347111474707 | -842.2290 | -19422.27 | -81262.75 |

Intensities  
 =====

| Frequency<br>cm-1 | Dipole Strength<br>1e-40 esu2 cm2 | Absorption Intensity (degeneracy not counted)<br>km/mole |
|-------------------|-----------------------------------|----------------------------------------------------------|
| -----             | -----                             | -----                                                    |
| 68.419279         | 3.223696                          | 0.055285                                                 |
| 281.425128        | 95.667244                         | 6.748453                                                 |
| 609.411526        | 18.588708                         | 2.839474                                                 |
| 629.997955        | 10.982929                         | 1.734345                                                 |
| 770.490969        | 31.444152                         | 6.072751                                                 |
| 835.578726        | 23.751746                         | 4.974632                                                 |
| 871.935522        | 36.258241                         | 7.924451                                                 |
| 898.192506        | 5.670540                          | 1.276650                                                 |
| 902.284602        | 104.749607                        | 23.690489                                                |
| 920.490305        | 69.127242                         | 15.949480                                                |
| 1006.384249       | 17.733985                         | 4.473508                                                 |
| 1039.690042       | 270.823952                        | 70.577948                                                |
| 1105.498778       | 5.115224                          | 1.417428                                                 |
| 1163.871521       | 16.438091                         | 4.795507                                                 |
| 1178.785432       | 10.361255                         | 3.061436                                                 |
| 1210.325821       | 13.876053                         | 4.209653                                                 |
| 1220.245544       | 14.311725                         | 4.377410                                                 |
| 1259.463559       | 3.272073                          | 1.032967                                                 |
| 1266.616758       | 0.341808                          | 0.108519                                                 |
| 1303.722575       | 4.483227                          | 1.465055                                                 |
| 1337.464945       | 21.554361                         | 7.225961                                                 |
| 1430.245395       | 2.651739                          | 0.950647                                                 |
| 1445.166963       | 14.291761                         | 5.177044                                                 |
| 1449.751965       | 0.104408                          | 0.037941                                                 |
| 1464.104832       | 3.004081                          | 1.102458                                                 |
| 2860.795612       | 78.360093                         | 56.190105                                                |
| 2867.031333       | 131.854608                        | 94.755804                                                |
| 2958.981900       | 33.604222                         | 24.923798                                                |
| 2969.593278       | 48.247891                         | 35.913140                                                |
| 2999.386912       | 32.956094                         | 24.776862                                                |
| 3007.967128       | 2.397602                          | 1.807708                                                 |
| 3011.684710       | 20.768012                         | 15.677706                                                |
| 3026.971486       | 66.060515                         | 50.121996                                                |

Zero-Point Energy : 0.112478 a.u.  
 ===== 3.060672 eV

H2

Geometry CYCLE 2  
 =====

Energy gradients wrt nuclear displacements  
 =====

| Atom | Cartesian (a.u./angstrom) |          |           |
|------|---------------------------|----------|-----------|
|      | X                         | Y        | Z         |
| 1 H  | 0.000000                  | 0.000000 | 0.000012  |
| 2 H  | 0.000000                  | 0.000000 | -0.000012 |

-----  
 Geometry Convergence after Step 2  
 -----

|                          |            |                     |   |  |
|--------------------------|------------|---------------------|---|--|
| current energy           |            | -0.24701946 Hartree |   |  |
| abs of energy change     | 0.00000001 | 0.00100000          | T |  |
| constrained gradient max | 0.00001224 | 0.00100000          | T |  |
| constrained gradient rms | 0.00000707 | 0.00066667          | T |  |
| gradient max             | 0.00001224 |                     |   |  |
| gradient rms             | 0.00000707 |                     |   |  |
| cart. step max           | 0.00000487 | 0.01000000          | T |  |
| cart. step rms           | 0.00000281 | 0.00666667          | T |  |

|                                                                 | hartree                   | eV             | kcal/mol       | kJ/mol         |
|-----------------------------------------------------------------|---------------------------|----------------|----------------|----------------|
|                                                                 | -----                     | -----          | -----          | -----          |
| <b>Pauli Repulsion</b>                                          |                           |                |                |                |
| Kinetic (Delta T^0):                                            | 0.586657888097204         | 15.9638        | 368.13         | 1540.27        |
| Delta V^Pauli Coulomb:                                          | -0.124043204450532        | -3.3754        | -77.84         | -325.68        |
| Delta V^Pauli LDA-XC:                                           | -0.093608449913325        | -2.5472        | -58.74         | -245.77        |
| Delta V^Pauli GGA-Exchange:                                     | -0.002585610259500        | -0.0704        | -1.62          | -6.79          |
| Delta V^Pauli GGA-Correlation:                                  | 0.001753742413758         | 0.0477         | 1.10           | 4.60           |
| -----                                                           | -----                     | -----          | -----          | -----          |
| Total Pauli Repulsion:                                          | 0.368174365887605         | 10.0185        | 231.03         | 966.64         |
| (Total Pauli Repulsion =<br>Delta E^Pauli in BB paper)          |                           |                |                |                |
| <b>Steric Interaction</b>                                       |                           |                |                |                |
| Pauli Repulsion (Delta E^Pauli):                                | 0.368174365887605         | 10.0185        | 231.03         | 966.64         |
| Electrostatic Interaction:                                      | 0.009131239247804         | 0.2485         | 5.73           | 23.97          |
| (Electrostatic Interaction =<br>Delta V_elstat in the BB paper) |                           |                |                |                |
| -----                                                           | -----                     | -----          | -----          | -----          |
| Total Steric Interaction:                                       | 0.377305605135409         | 10.2670        | 236.76         | 990.62         |
| (Total Steric Interaction =<br>Delta E^0 in the BB paper)       |                           |                |                |                |
| <b>Orbital Interactions</b>                                     |                           |                |                |                |
| SIGMA.g:                                                        | -0.478572041547944        | -13.0226       | -300.31        | -1256.49       |
| SIGMA.u:                                                        | -0.145625006965815        | -3.9627        | -91.38         | -382.34        |
| PI.g:                                                           | 0.000000000000000         | 0.0000         | 0.00           | 0.00           |
| PI.u:                                                           | 0.000000000000000         | 0.0000         | 0.00           | 0.00           |
| -----                                                           | -----                     | -----          | -----          | -----          |
| Total Orbital Interactions:                                     | -0.624323907551419        | -16.9887       | -391.77        | -1639.16       |
| <b>Alternative Decomposition Orb.Int.</b>                       |                           |                |                |                |
| Kinetic:                                                        | -0.348648410664324        | -9.4872        | -218.78        | -915.38        |
| Coulomb:                                                        | -0.187379696954795        | -5.0989        | -117.58        | -491.97        |
| XC:                                                             | -0.088295799932301        | -2.4027        | -55.41         | -231.82        |
| -----                                                           | -----                     | -----          | -----          | -----          |
| Total Orbital Interactions:                                     | -0.624323907551419        | -16.9887       | -391.77        | -1639.16       |
| Residu (E=Steric+OrbInt+Res):                                   | 0.000000007331080         | 0.0000         | 0.00           | 0.00           |
| Dispersion Energy:                                              | -0.000001163948600        | 0.0000         | 0.00           | 0.00           |
| <b>Total Bonding Energy:</b>                                    | <b>-0.247019459033531</b> | <b>-6.7217</b> | <b>-155.01</b> | <b>-648.55</b> |

Summary of Bonding Energy (energy terms are taken from the energy decomposition above)  
 =====

|                                 |                    |         |         |         |
|---------------------------------|--------------------|---------|---------|---------|
| Electrostatic Energy:           | 0.009131239247804  | 0.2485  | 5.73    | 23.97   |
| Kinetic Energy:                 | 0.238009477432881  | 6.4766  | 149.35  | 624.89  |
| Coulomb (Steric+OrbInt) Energy: | -0.311422894074247 | -8.4742 | -195.42 | -817.64 |
| XC Energy:                      | -0.182736117691369 | -4.9725 | -114.67 | -479.77 |
| Dispersion Energy:              | -0.000001163948600 | 0.0000  | 0.00    | 0.00    |
| -----                           | -----              | -----   | -----   | -----   |
| Total Bonding Energy:           | -0.247019459033531 | -6.7217 | -155.01 | -648.55 |



F R A G M E N T   E N E R G Y   T E R M S   \*\*\* (summed over all fragments) \*\*\*

The energy terms below are (parts of) the Total Energy of the fragments from which the molecule is built.

Exchange and Correlation

|                  |                    |          |         |          |
|------------------|--------------------|----------|---------|----------|
| Exchange LDA:    | -0.396722097407383 | -10.7954 | -248.95 | -1041.59 |
| Exchange GGA:    | -0.087472208603464 | -2.3802  | -54.89  | -229.66  |
| Correlation LDA: | -0.079840340640093 | -2.1726  | -50.10  | -209.62  |
| Correlation GGA: | 0.047665891717013  | 1.2971   | 29.91   | 125.15   |
|                  | -----              | -----    | -----   | -----    |
| Total XC:        | -0.516368754933928 | -14.0511 | -324.03 | -1355.73 |

Intensities

=====

| Frequency<br>cm-1 | Dipole Strength<br>1e-40 esu2 cm2 | Absorption Intensity (degeneracy not counted)<br>km/mole |
|-------------------|-----------------------------------|----------------------------------------------------------|
| -----             | -----                             | -----                                                    |
| 4300.547628       | 0.000000                          | 0.000000                                                 |

Zero-Point Energy :      0.009797 a.u.  
=====                    0.266600 eV

S1

Geometry CYCLE 31

=====

Energy gradients wrt nuclear displacements

=====

| Atom  | Cartesian (a.u./angstrom) |           |           |
|-------|---------------------------|-----------|-----------|
|       | X                         | Y         | Z         |
| 1 C   | -0.000068                 | -0.000033 | 0.000001  |
| 2 H   | -0.000031                 | -0.000070 | -0.000018 |
| 3 C   | 0.000017                  | -0.000008 | 0.000009  |
| 4 C   | 0.000006                  | 0.000027  | -0.000024 |
| 5 Cl  | -0.000138                 | -0.000060 | -0.000180 |
| 6 N   | 0.000133                  | -0.000058 | -0.000081 |
| 7 O   | 0.000069                  | -0.000080 | -0.000135 |
| 8 C   | -0.000054                 | -0.000045 | -0.000039 |
| 9 O   | -0.000084                 | -0.000068 | -0.000088 |
| 10 H  | -0.000041                 | -0.000051 | 0.000036  |
| 11 C  | -0.000007                 | 0.000065  | 0.000229  |
| 12 C  | 0.000005                  | -0.000001 | -0.000008 |
| 13 C  | 0.000196                  | 0.000144  | 0.000140  |
| 14 Ru | 0.000362                  | -0.000253 | 0.000004  |
| 15 H  | -0.000060                 | -0.000104 | 0.000029  |
| 16 Ru | 0.000454                  | 0.000171  | 0.000049  |
| 17 C  | -0.000029                 | -0.000034 | 0.000007  |
| 18 C  | -0.000342                 | 0.000011  | 0.000202  |
| 19 C  | 0.000017                  | 0.000040  | -0.000025 |
| 20 C  | -0.000054                 | -0.000060 | 0.000046  |
| 21 H  | -0.000022                 | 0.000018  | 0.000047  |
| 22 H  | 0.000087                  | 0.000061  | 0.000012  |
| 23 C  | 0.000021                  | 0.000024  | -0.000013 |
| 24 O  | -0.000128                 | 0.000088  | 0.000030  |
| 25 N  | 0.000175                  | 0.000120  | -0.000002 |
| 26 H  | -0.000017                 | -0.000037 | 0.000032  |
| 27 C  | 0.000086                  | 0.000051  | 0.000004  |
| 28 C  | -0.000007                 | -0.000032 | -0.000072 |
| 29 H  | 0.000012                  | -0.000005 | 0.000009  |
| 30 C  | -0.000064                 | -0.000149 | 0.000105  |
| 31 C  | -0.000031                 | -0.000018 | 0.000008  |
| 32 C  | -0.000073                 | 0.000021  | -0.000055 |
| 33 C  | 0.000015                  | 0.000032  | 0.000003  |
| 34 H  | -0.000025                 | -0.000033 | 0.000022  |
| 35 C  | -0.000162                 | -0.000066 | -0.000070 |
| 36 C  | -0.000083                 | -0.000102 | -0.000010 |
| 37 H  | 0.000020                  | -0.000024 | -0.000003 |
| 38 C  | -0.000073                 | -0.000081 | -0.000013 |
| 39 C  | 0.000065                  | 0.000022  | 0.000033  |
| 40 C  | 0.000011                  | 0.000010  | 0.000024  |
| 41 H  | -0.000031                 | 0.000028  | -0.000039 |
| 42 H  | -0.000033                 | -0.000045 | -0.000004 |
| 43 C  | -0.000011                 | 0.000048  | -0.000015 |
| 44 H  | 0.000051                  | 0.000037  | -0.000032 |
| 45 C  | -0.000051                 | -0.000008 | -0.000006 |
| 46 H  | -0.000014                 | 0.000014  | -0.000005 |
| 47 H  | -0.000034                 | -0.000001 | -0.000001 |
| 48 H  | 0.000033                  | 0.000018  | -0.000026 |
| 49 H  | -0.000026                 | -0.000033 | -0.000013 |
| 50 Cl | -0.000095                 | 0.000162  | -0.000109 |
| 51 C  | -0.000124                 | 0.000278  | -0.000045 |
| 52 O  | 0.000176                  | 0.000074  | 0.000047  |

-----  
 Geometry Convergence after Step 31

|                          |            |                      |   |
|--------------------------|------------|----------------------|---|
| current energy           |            | -13.12371103 Hartree |   |
| abs of energy change     | 0.00001438 | 0.00100000           | T |
| constrained gradient max | 0.00045415 | 0.00100000           | T |
| constrained gradient rms | 0.00009281 | 0.00066667           | T |
| gradient max             | 0.00045415 |                      |   |
| gradient rms             | 0.00009281 |                      |   |
| cart. step max           | 0.00814301 | 0.01000000           | T |
| cart. step rms           | 0.00229654 | 0.00666667           | T |

|                           | hartree             | eV        | kcal/mol | kJ/mol    |
|---------------------------|---------------------|-----------|----------|-----------|
|                           | -----               | -----     | -----    | -----     |
| Pauli Repulsion           |                     |           |          |           |
| Kinetic ( $\Delta T^0$ ): | 153.952132502709020 | 4189.2507 | 96606.43 | 404201.27 |

Electronic Supplementary Information for Dalton Transactions  
 This journal is © The Royal Society of Chemistry 2010

|                                                                            |                      |            |           |            |
|----------------------------------------------------------------------------|----------------------|------------|-----------|------------|
| Delta V <sup>Pauli</sup> Coulomb:                                          | -80.347159564187194  | -2186.3575 | -50418.61 | -210951.44 |
| Delta V <sup>Pauli</sup> LDA-XC:                                           | -18.978088241945624  | -516.4201  | -11908.93 | -49826.96  |
| Delta V <sup>Pauli</sup> GGA-Exchange:                                     | 1.111431930123906    | 30.2436    | 697.43    | 2918.06    |
| Delta V <sup>Pauli</sup> GGA-Correlation:                                  | -0.313327236086980   | -8.5261    | -196.62   | -822.64    |
| -----                                                                      |                      |            |           |            |
| Total Pauli Repulsion:                                                     | 55.424989390613121   | 1508.1907  | 34779.71  | 145518.29  |
| (Total Pauli Repulsion =<br>Delta E <sup>Pauli</sup> in BB paper)          |                      |            |           |            |
| Steric Interaction                                                         |                      |            |           |            |
| Pauli Repulsion (Delta E <sup>Pauli</sup> ):                               | 55.424989390613121   | 1508.1907  | 34779.71  | 145518.29  |
| Electrostatic Interaction:                                                 | -11.830276015325479  | -321.9182  | -7423.61  | -31060.39  |
| (Electrostatic Interaction =<br>Delta V <sub>elstat</sub> in the BB paper) |                      |            |           |            |
| -----                                                                      |                      |            |           |            |
| Total Steric Interaction:                                                  | 43.594713375287640   | 1186.2725  | 27356.10  | 114457.90  |
| (Total Steric Interaction =<br>Delta E <sup>0</sup> in the BB paper)       |                      |            |           |            |
| Orbital Interactions                                                       |                      |            |           |            |
| A:                                                                         | -56.603504382532336  | -1540.2597 | -35519.24 | -148612.48 |
| -----                                                                      |                      |            |           |            |
| Total Orbital Interactions:                                                | -56.610529736491607  | -1540.4509 | -35523.65 | -148630.92 |
| Alternative Decomposition Orb.Int.                                         |                      |            |           |            |
| Kinetic:                                                                   | -141.565142472235721 | -3852.1835 | -88833.48 | -371679.23 |
| Coulomb:                                                                   | 78.217373469240698   | 2128.4030  | 49082.15  | 205359.68  |
| XC:                                                                        | 6.737239266503427    | 183.3296   | 4227.68   | 17688.62   |
| -----                                                                      |                      |            |           |            |
| Total Orbital Interactions:                                                | -56.610529736491593  | -1540.4509 | -35523.65 | -148630.92 |
| Residu (E=Steric+OrbInt+Res):                                              | -0.000018446508690   | -0.0005    | -0.01     | -0.05      |
| Dispersion Energy:                                                         | -0.107876461011881   | -2.9355    | -67.69    | -283.23    |
| Total Bonding Energy:                                                      | -13.123711268724540  | -357.1144  | -8235.25  | -34456.30  |

Summary of Bonding Energy (energy terms are taken from the energy decomposition above)

|                                 |                     |           |          |           |
|---------------------------------|---------------------|-----------|----------|-----------|
| Electrostatic Energy:           | -11.830276015325479 | -321.9182 | -7423.61 | -31060.39 |
| Kinetic Energy:                 | 12.386990030473299  | 337.0671  | 7772.95  | 32522.04  |
| Coulomb (Steric+OrbInt) Energy: | -2.129804541455186  | -57.9549  | -1336.47 | -5591.80  |
| XC Energy:                      | -11.442744281405272 | -311.3729 | -7180.43 | -30042.92 |
| Dispersion Energy:              | -0.107876461011881  | -2.9355   | -67.69   | -283.23   |
| -----                           |                     |           |          |           |
| Total Bonding Energy:           | -13.123711268724520 | -357.1144 | -8235.25 | -34456.30 |

FRAGMENT ENERGY TERMS \*\*\* (summed over all fragments) \*\*\*

The energy terms below are (parts of) the Total Energy of the fragments from which the molecule is built.

|                          |                      |             |            |             |
|--------------------------|----------------------|-------------|------------|-------------|
| Exchange and Correlation |                      |             |            |             |
| Exchange LDA:            | -459.234343486345836 | -12496.4023 | -288173.93 | -1205719.60 |
| Exchange GGA:            | -38.707740255224188  | -1053.2912  | -24289.48  | -101627.16  |
| Correlation LDA:         | -24.378269980365868  | -663.3665   | -15297.60  | -64005.14   |
| Correlation GGA:         | 11.324532059261134   | 308.1562    | 7106.25    | 29732.55    |
| -----                    |                      |             |            |             |
| Total XC:                | -510.995821662674700 | -13904.9038 | -320654.75 | -1341619.34 |

Intensities

=====

| Frequency<br>cm-1 | Dipole Strength<br>1e-40 esu <sup>2</sup> cm <sup>2</sup> | Absorption Intensity (degeneracy not counted)<br>km/mole |
|-------------------|-----------------------------------------------------------|----------------------------------------------------------|
| -----             |                                                           |                                                          |
| 16.407522         | 122.426407                                                | 0.503496                                                 |
| 27.640788         | 239.282897                                                | 1.657831                                                 |
| 32.629782         | 105.467618                                                | 0.862604                                                 |
| 34.376802         | 13.502056                                                 | 0.116344                                                 |
| 42.527907         | 0.970340                                                  | 0.010344                                                 |
| 66.184792         | 5.925825                                                  | 0.098307                                                 |
| 67.881432         | 4.167426                                                  | 0.070908                                                 |
| 69.190312         | 1.966606                                                  | 0.034107                                                 |
| 76.260582         | 0.083871                                                  | 0.001603                                                 |
| 84.106624         | 121.686461                                                | 2.565373                                                 |
| 87.505705         | 0.477713                                                  | 0.010478                                                 |
| 90.461567         | 3.019843                                                  | 0.068474                                                 |
| 90.777980         | 1.426425                                                  | 0.032457                                                 |
| 95.867225         | 0.184745                                                  | 0.004439                                                 |
| 106.380128        | 5.334753                                                  | 0.142250                                                 |

|             |            |           |
|-------------|------------|-----------|
| 107.327134  | 34.490071  | 0.927858  |
| 117.814900  | 2.745834   | 0.081087  |
| 128.061312  | 0.026047   | 0.000836  |
| 139.177032  | 0.010590   | 0.000369  |
| 152.806689  | 41.658050  | 1.595583  |
| 186.366421  | 38.702382  | 1.807938  |
| 198.686069  | 0.006173   | 0.000307  |
| 200.894378  | 10.406037  | 0.524000  |
| 203.941158  | 0.035306   | 0.001805  |
| 216.081160  | 224.564695 | 12.162881 |
| 219.615479  | 3.385921   | 0.186388  |
| 254.137172  | 42.625080  | 2.715260  |
| 254.968722  | 1.238357   | 0.079143  |
| 261.395074  | 0.942605   | 0.061760  |
| 263.834325  | 56.105112  | 3.710324  |
| 269.341821  | 0.017492   | 0.001181  |
| 284.380546  | 744.191154 | 53.047199 |
| 290.541272  | 5.944062   | 0.432882  |
| 292.248047  | 73.836282  | 5.408782  |
| 371.337824  | 8.839940   | 0.822804  |
| 372.018280  | 24.360502  | 2.271583  |
| 413.370890  | 65.781893  | 6.815917  |
| 414.301720  | 18.834723  | 1.955933  |
| 423.950451  | 12.976465  | 1.378953  |
| 425.107333  | 0.008438   | 0.000899  |
| 465.281802  | 0.172425   | 0.020109  |
| 466.030212  | 21.824777  | 2.549423  |
| 468.469252  | 0.041778   | 0.004906  |
| 468.957408  | 14.345462  | 1.686266  |
| 486.907761  | 1.311448   | 0.160057  |
| 487.288662  | 19.640757  | 2.398958  |
| 507.964490  | 0.345321   | 0.043968  |
| 510.388036  | 66.519261  | 8.509930  |
| 519.797473  | 128.116765 | 16.692378 |
| 520.129257  | 17.469688  | 2.277585  |
| 542.408452  | 7.851903   | 1.067528  |
| 543.006654  | 52.648290  | 7.165846  |
| 554.776924  | 3.573570   | 0.496934  |
| 555.388015  | 0.080829   | 0.011252  |
| 592.703991  | 49.606325  | 7.369754  |
| 593.526305  | 176.435302 | 26.248442 |
| 624.129246  | 22.948505  | 3.590104  |
| 624.810702  | 52.104796  | 8.160264  |
| 635.707208  | 233.553693 | 37.215336 |
| 636.542768  | 15.176010  | 2.421382  |
| 643.313539  | 28.730609  | 4.632822  |
| 643.643949  | 23.408040  | 3.776494  |
| 659.524315  | 1.727507   | 0.285581  |
| 659.907868  | 14.844217  | 2.455380  |
| 712.304460  | 22.902611  | 4.089109  |
| 713.148855  | 27.376164  | 4.893627  |
| 721.606078  | 0.055141   | 0.009974  |
| 721.919098  | 224.315542 | 40.590646 |
| 737.693391  | 286.438032 | 52.964472 |
| 738.051020  | 459.180923 | 84.947048 |
| 754.564876  | 2.852259   | 0.539465  |
| 755.301810  | 3.416214   | 0.646761  |
| 780.435433  | 5.188794   | 1.015036  |
| 780.731441  | 20.756200  | 4.061885  |
| 843.173605  | 3.738542   | 0.790128  |
| 843.708445  | 3.117751   | 0.659344  |
| 860.466680  | 7.132538   | 1.538354  |
| 860.956359  | 4.406271   | 0.950890  |
| 921.099001  | 0.415603   | 0.095954  |
| 921.655250  | 0.516019   | 0.119210  |
| 960.386771  | 5.407271   | 1.301674  |
| 960.625340  | 0.970081   | 0.233583  |
| 962.624474  | 4.225411   | 1.019539  |
| 962.718834  | 1.833422   | 0.442425  |
| 974.865531  | 1.689495   | 0.412838  |
| 975.329480  | 0.896734   | 0.219227  |
| 998.532290  | 6.221002   | 1.557043  |
| 998.611207  | 30.380036  | 7.604362  |
| 1004.740355 | 157.569607 | 39.682988 |
| 1005.179430 | 70.864066  | 17.854502 |
| 1015.266556 | 0.062701   | 0.015956  |
| 1015.503228 | 27.981538  | 7.122475  |
| 1045.204084 | 4.226615   | 1.107317  |
| 1045.506138 | 4.652195   | 1.219165  |
| 1048.376777 | 58.043351  | 15.252743 |
| 1049.155560 | 49.148424  | 12.924911 |
| 1093.878480 | 6.916022   | 1.896285  |
| 1094.515879 | 7.286476   | 1.999023  |
| 1106.316182 | 2.971740   | 0.824078  |
| 1106.811638 | 3.717122   | 1.031237  |

Electronic Supplementary Information for Dalton Transactions  
This journal is © The Royal Society of Chemistry 2010

|             |             |             |
|-------------|-------------|-------------|
| 1133.999792 | 7.161952    | 2.035741    |
| 1134.114603 | 15.606982   | 4.436638    |
| 1150.191839 | 43.610631   | 12.573052   |
| 1150.291946 | 4.655622    | 1.342344    |
| 1240.131000 | 13.305606   | 4.135998    |
| 1240.913860 | 19.357581   | 6.021030    |
| 1268.904619 | 89.865861   | 28.582604   |
| 1269.376871 | 3.592448    | 1.143034    |
| 1283.434252 | 12.390445   | 3.986012    |
| 1283.911407 | 10.274056   | 3.306397    |
| 1302.953349 | 40.347270   | 13.177138   |
| 1304.370996 | 34.532709   | 11.290414   |
| 1314.496246 | 35.771572   | 11.786245   |
| 1315.009595 | 32.717968   | 10.784334   |
| 1408.797107 | 35.072530   | 12.384932   |
| 1409.100749 | 103.806739  | 36.664491   |
| 1423.657323 | 11.509760   | 4.107237    |
| 1423.910325 | 14.839959   | 5.296554    |
| 1441.549735 | 3.896525    | 1.407943    |
| 1442.129006 | 14.743891   | 5.329596    |
| 1468.867467 | 18.157696   | 6.685308    |
| 1469.579770 | 283.674148  | 104.493913  |
| 1538.437814 | 18.573892   | 7.162439    |
| 1538.847146 | 31.728182   | 12.238234   |
| 1551.720135 | 88.054724   | 34.248703   |
| 1552.322795 | 78.107671   | 30.391616   |
| 1570.575561 | 125.914970  | 49.569469   |
| 1571.372162 | 102.966171  | 40.555680   |
| 1594.113370 | 124.087632  | 49.582198   |
| 1594.665125 | 167.088583  | 66.787370   |
| 1941.636128 | 85.858613   | 41.785902   |
| 1943.411662 | 2347.436678 | 1143.501558 |
| 2003.408481 | 2509.712728 | 1260.293195 |
| 2007.336012 | 13.357281   | 6.720726    |
| 3077.167214 | 2.482910    | 1.915094    |
| 3077.958719 | 1.869286    | 1.442170    |
| 3088.083295 | 8.886580    | 6.878627    |
| 3088.594978 | 8.944362    | 6.924500    |
| 3096.274878 | 17.119545   | 13.286476   |
| 3096.646663 | 16.765519   | 13.013278   |
| 3098.600985 | 8.509888    | 6.609484    |
| 3098.763552 | 9.919582    | 7.704774    |
| 3106.007018 | 15.950647   | 12.418204   |
| 3106.738301 | 23.316822   | 18.157334   |
| 3110.402318 | 73.699512   | 57.459157   |
| 3110.505632 | 12.943652   | 10.091736   |
| 3128.732167 | 2.329308    | 1.826726    |
| 3129.109642 | 2.479769    | 1.944957    |
| 3133.682208 | 10.459928   | 8.216024    |
| 3134.084277 | 8.249392    | 6.480532    |

Zero-Point Energy : 0.348378 a.u.  
===== 9.479854 eV

A1

Geometry CYCLE 20

=====

Energy gradients wrt nuclear displacements

=====

| Atom  | Cartesian (a.u./angstrom) |           |           |
|-------|---------------------------|-----------|-----------|
|       | X                         | Y         | Z         |
| 1 O   | 0.000027                  | 0.000008  | -0.000065 |
| 2 O   | 0.000121                  | -0.000073 | 0.000012  |
| 3 C   | -0.000058                 | 0.000097  | 0.000193  |
| 4 C   | -0.000334                 | -0.000107 | -0.000023 |
| 5 H   | 0.000023                  | 0.000088  | -0.000003 |
| 6 Ru  | -0.000145                 | -0.000669 | -0.000057 |
| 7 C   | 0.000217                  | 0.000007  | -0.000017 |
| 8 H   | 0.000010                  | 0.000018  | 0.000003  |
| 9 N   | -0.000446                 | -0.000002 | 0.000198  |
| 10 H  | 0.000000                  | -0.000002 | 0.000023  |
| 11 C  | -0.000106                 | -0.000016 | 0.000059  |
| 12 C  | -0.000052                 | 0.000542  | 0.000078  |
| 13 C  | 0.000087                  | -0.000151 | 0.000089  |
| 14 C  | 0.000093                  | -0.000088 | -0.000058 |
| 15 C  | 0.000029                  | 0.000011  | -0.000095 |
| 16 C  | 0.000017                  | 0.000011  | 0.000026  |
| 17 C  | -0.000028                 | 0.000060  | -0.000011 |
| 18 C  | 0.000032                  | -0.000013 | -0.000038 |
| 19 H  | -0.000006                 | -0.000050 | -0.000038 |
| 20 H  | 0.000040                  | 0.000012  | -0.000015 |
| 21 C  | 0.000040                  | -0.000081 | 0.000016  |
| 22 H  | 0.000014                  | 0.000043  | -0.000012 |
| 23 C  | 0.000008                  | 0.000049  | 0.000014  |
| 24 H  | 0.000018                  | 0.000056  | -0.000008 |
| 25 H  | 0.000007                  | -0.000018 | -0.000029 |
| 26 Cl | -0.000180                 | 0.000177  | -0.000055 |
| 27 N  | -0.000038                 | -0.000214 | 0.000279  |
| 28 H  | 0.000289                  | -0.000226 | -0.000254 |
| 29 H  | -0.000047                 | 0.000178  | -0.000168 |
| 30 H  | -0.000007                 | -0.000116 | 0.000011  |
| 31 B  | -0.000026                 | 0.000173  | 0.000065  |
| 32 H  | -0.000059                 | 0.000015  | -0.000101 |
| 33 H  | 0.000479                  | 0.000126  | -0.000040 |
| 34 H  | -0.000021                 | 0.000153  | 0.000021  |

-----  
 Geometry Convergence after Step 20

|                          |            |                     |   |
|--------------------------|------------|---------------------|---|
| current energy           |            | -7.91684126 Hartree |   |
| abs of energy change     | 0.00001542 | 0.00100000          | T |
| constrained gradient max | 0.00066907 | 0.00100000          | T |
| constrained gradient rms | 0.00014583 | 0.00066667          | T |
| gradient max             | 0.00066907 |                     |   |
| gradient rms             | 0.00014583 |                     |   |
| cart. step max           | 0.00916826 | 0.01000000          | T |
| cart. step rms           | 0.00255898 | 0.00666667          | T |

Number of elements of the density matrix on this node (used, total): 37258 148240

|                                                                 | hartree             | eV         | kcal/mol  | kJ/mol     |
|-----------------------------------------------------------------|---------------------|------------|-----------|------------|
| Pauli Repulsion                                                 |                     |            |           |            |
| Kinetic (Delta T^0):                                            | 87.082607436524015  | 2369.6383  | 54645.17  | 228635.35  |
| Delta V^Pauli Coulomb:                                          | -44.722204339322715 | -1216.9531 | -28063.61 | -117418.13 |
| Delta V^Pauli LDA-XC:                                           | -10.924865562227266 | -297.2807  | -6855.46  | -28683.23  |
| Delta V^Pauli GGA-Exchange:                                     | 0.616210475069398   | 16.7679    | 386.68    | 1617.86    |
| Delta V^Pauli GGA-Correlation:                                  | -0.170541876599161  | -4.6407    | -107.02   | -447.76    |
| Total Pauli Repulsion:                                          | 31.881206133444266  | 867.5318   | 20005.76  | 83704.09   |
| (Total Pauli Repulsion =<br>Delta E^Pauli in BB paper)          |                     |            |           |            |
| Steric Interaction                                              |                     |            |           |            |
| Pauli Repulsion (Delta E^Pauli):                                | 31.881206133444266  | 867.5318   | 20005.76  | 83704.09   |
| Electrostatic Interaction:                                      | -6.642512807162000  | -180.7520  | -4168.24  | -17439.91  |
| (Electrostatic Interaction =<br>Delta V_elstat in the BB paper) |                     |            |           |            |

Electronic Supplementary Information for Dalton Transactions  
This journal is © The Royal Society of Chemistry 2010

|                                                                                                   |                     |            |           |            |
|---------------------------------------------------------------------------------------------------|---------------------|------------|-----------|------------|
| Total Steric Interaction:<br>(Total Steric Interaction =<br>Delta E <sup>0</sup> in the BB paper) | 25.238693326282267  | 686.7798   | 15837.52  | 66264.18   |
| Orbital Interactions                                                                              |                     |            |           |            |
| A:                                                                                                | -33.092389030855855 | -900.4897  | -20765.79 | -86884.06  |
|                                                                                                   | -----               | -----      | -----     | -----      |
| Total Orbital Interactions:                                                                       | -33.095200744598152 | -900.5662  | -20767.55 | -86891.44  |
| Alternative Decomposition Orb.Int.                                                                |                     |            |           |            |
| Kinetic:                                                                                          | -79.636659051085687 | -2167.0238 | -49972.76 | -209086.02 |
| Coulomb:                                                                                          | 42.957958291003600  | 1168.9455  | 26956.53  | 112786.10  |
| XC:                                                                                               | 3.583500015483937   | 97.5120    | 2248.68   | 9408.48    |
|                                                                                                   | -----               | -----      | -----     | -----      |
| Total Orbital Interactions:                                                                       | -33.095200744598152 | -900.5662  | -20767.55 | -86891.44  |
| Residu (E=Steric+OrbInt+Res):                                                                     | -0.000010618053354  | -0.0003    | -0.01     | -0.03      |
| Dispersion Energy:                                                                                | -0.060323228342564  | -1.6415    | -37.85    | -158.38    |
| Total Bonding Energy:                                                                             | -7.916841264711804  | -215.4282  | -4967.89  | -20785.66  |
| Summary of Bonding Energy (energy terms are taken from the energy decomposition above)            |                     |            |           |            |
| =====                                                                                             |                     |            |           |            |
| Electrostatic Energy:                                                                             | -6.642512807162000  | -180.7520  | -4168.24  | -17439.91  |
| Kinetic Energy:                                                                                   | 7.445948385438328   | 202.6146   | 4672.40   | 19549.33   |
| Coulomb (Steric+OrbInt) Energy:                                                                   | -1.764256666372468  | -48.0079   | -1107.09  | -4632.06   |
| XC Energy:                                                                                        | -6.895696948273093  | -187.6415  | -4327.12  | -18104.65  |
| Dispersion Energy:                                                                                | -0.060323228342564  | -1.6415    | -37.85    | -158.38    |
|                                                                                                   | -----               | -----      | -----     | -----      |
| Total Bonding Energy:                                                                             | -7.916841264711797  | -215.4282  | -4967.89  | -20785.66  |

F R A G M E N T E N E R G Y T E R M S \*\*\* (summed over all fragments) \*\*\*

The energy terms below are (parts of) the Total Energy of the fragments from which the molecule is built.

|                          |                      |            |            |            |
|--------------------------|----------------------|------------|------------|------------|
| Exchange and Correlation |                      |            |            |            |
| Exchange LDA:            | -239.772684219817620 | -6524.5467 | -150459.65 | -629523.09 |
| Exchange GGA:            | -20.772099868263194  | -565.2376  | -13034.69  | -54537.14  |
| Correlation LDA:         | -13.181956846791044  | -358.6993  | -8271.80   | -34609.22  |
| Correlation GGA:         | 6.202755285868969    | 168.7856   | 3892.29    | 16285.33   |
|                          | -----                | -----      | -----      | -----      |
| Total XC:                | -267.523985649002839 | -7279.6980 | -167873.85 | -702384.12 |

Intensities  
=====

| Frequency<br>cm-1 | Dipole Strength<br>1e-40 esu2 cm2 | Absorption Intensity (degeneracy not counted)<br>km/mole |
|-------------------|-----------------------------------|----------------------------------------------------------|
| -----             | -----                             | -----                                                    |
| 33.844797         | 811.446896                        | 6.883829                                                 |
| 39.640532         | 51.099372                         | 0.507730                                                 |
| 57.510083         | 105.233557                        | 1.516968                                                 |
| 69.739823         | 42.256800                         | 0.738679                                                 |
| 86.006977         | 42.024931                         | 0.905980                                                 |
| 88.578074         | 13.825428                         | 0.306961                                                 |
| 93.399033         | 15.178336                         | 0.355340                                                 |
| 113.309823        | 64.995692                         | 1.845994                                                 |
| 118.358020        | 20.807604                         | 0.617302                                                 |
| 143.854597        | 104.295881                        | 3.760702                                                 |
| 147.640671        | 122.593731                        | 4.536828                                                 |
| 196.413312        | 27.144032                         | 1.336360                                                 |
| 203.031282        | 33.732829                         | 1.716698                                                 |
| 211.064751        | 163.624482                        | 8.656495                                                 |
| 224.061954        | 119.717223                        | 6.723615                                                 |
| 256.724961        | 146.384580                        | 9.419796                                                 |
| 266.318321        | 208.373282                        | 13.909808                                                |
| 272.304937        | 218.340052                        | 14.902770                                                |
| 292.975023        | 96.431454                         | 7.081535                                                 |
| 315.886678        | 253.569608                        | 20.077359                                                |
| 371.996662        | 26.146768                         | 2.438008                                                 |
| 412.361209        | 35.971599                         | 3.718053                                                 |
| 422.607654        | 0.830312                          | 0.087954                                                 |
| 464.649967        | 8.822109                          | 1.027487                                                 |
| 468.677587        | 10.168905                         | 1.194611                                                 |
| 472.785115        | 50.874710                         | 6.028980                                                 |
| 502.219290        | 32.003114                         | 4.028689                                                 |
| 514.201830        | 80.826085                         | 10.417493                                                |
| 538.747015        | 60.865652                         | 8.219307                                                 |
| 553.245349        | 0.639733                          | 0.088715                                                 |

|             |             |            |
|-------------|-------------|------------|
| 571.563314  | 98.664897   | 14.135302  |
| 591.012480  | 92.106628   | 13.644751  |
| 624.487642  | 29.388253   | 4.600189   |
| 634.205312  | 196.437735  | 31.227187  |
| 642.887498  | 19.696563   | 3.173975   |
| 659.243370  | 12.404983   | 2.049840   |
| 683.234392  | 35.671812   | 6.109040   |
| 711.762940  | 53.259960   | 9.501984   |
| 721.337863  | 97.581773   | 17.643531  |
| 738.478827  | 191.982480  | 35.536751  |
| 740.582428  | 217.580603  | 40.389795  |
| 755.332775  | 3.508219    | 0.664207   |
| 770.409056  | 123.763484  | 23.899674  |
| 781.619951  | 3.938793    | 0.771679   |
| 842.422961  | 1.558499    | 0.329090   |
| 860.313228  | 0.312214    | 0.067327   |
| 920.079640  | 0.096243    | 0.022196   |
| 960.259639  | 0.401218    | 0.096571   |
| 963.029790  | 2.459868    | 0.593786   |
| 968.387400  | 58.372579   | 14.168898  |
| 976.580152  | 1.772428    | 0.433865   |
| 997.367636  | 23.678801   | 5.919609   |
| 1007.019361 | 91.683345   | 23.142290  |
| 1014.222327 | 26.121924   | 6.640739   |
| 1042.637872 | 1.907353    | 0.498474   |
| 1048.142628 | 69.581718   | 18.280733  |
| 1056.532236 | 205.253483  | 54.356484  |
| 1086.471437 | 310.111908  | 84.452950  |
| 1094.616719 | 4.090084    | 1.122206   |
| 1105.896866 | 5.842483    | 1.619534   |
| 1133.178127 | 12.158210   | 3.453392   |
| 1149.199782 | 19.006710   | 5.474955   |
| 1160.831348 | 95.403770   | 27.759570  |
| 1222.470045 | 70.714985   | 21.668445  |
| 1238.373635 | 19.641605   | 6.096867   |
| 1268.260027 | 62.770317   | 19.954493  |
| 1281.932481 | 6.739047    | 2.165418   |
| 1304.531776 | 40.159172   | 13.131595  |
| 1315.302251 | 34.152226   | 11.259592  |
| 1365.102057 | 316.935562  | 108.446156 |
| 1407.705828 | 64.229479   | 22.663364  |
| 1423.632193 | 16.628725   | 5.933826   |
| 1440.514832 | 12.035982   | 4.345876   |
| 1469.210388 | 212.943226  | 78.419829  |
| 1537.262571 | 32.486639   | 12.517884  |
| 1550.866569 | 66.212525   | 25.739058  |
| 1571.869613 | 110.906234  | 43.696892  |
| 1586.459087 | 18.522664   | 7.365638   |
| 1593.630503 | 143.813882  | 57.446889  |
| 1604.941690 | 45.934806   | 18.479032  |
| 1950.321360 | 1264.335262 | 618.082572 |
| 2008.560842 | 1087.673128 | 547.597505 |
| 2156.660449 | 1320.936006 | 714.071372 |
| 2472.174494 | 169.161490  | 104.823509 |
| 2544.296281 | 91.247509   | 58.192467  |
| 2756.192885 | 1119.962663 | 773.733181 |
| 3077.652737 | 1.324046    | 1.021411   |
| 3086.989996 | 7.690403    | 5.950623   |
| 3091.644176 | 40.203540   | 31.155295  |
| 3095.222756 | 2.940196    | 2.281110   |
| 3096.577882 | 17.291853   | 13.421517  |
| 3109.576579 | 36.838989   | 28.713559  |
| 3121.023480 | 9.944369    | 7.779512   |
| 3132.808923 | 5.921280    | 4.649728   |
| 3385.897578 | 46.517550   | 39.479235  |
| 3462.207644 | 28.502753   | 24.735346  |

Zero-Point Energy : 0.243070 a.u.  
===== 6.614270 eV



A2

Geometry CYCLE 57  
 =====

Energy gradients wrt nuclear displacements  
 =====

| Atom  | Cartesian (a.u./angstrom) |           |           |
|-------|---------------------------|-----------|-----------|
|       | X                         | Y         | Z         |
| 1 O   | -0.000072                 | -0.000059 | -0.000011 |
| 2 O   | 0.000250                  | 0.000292  | 0.000046  |
| 3 C   | -0.000094                 | -0.000031 | 0.000065  |
| 4 C   | 0.000107                  | 0.000209  | 0.000063  |
| 5 H   | -0.000021                 | -0.000028 | -0.000008 |
| 6 Ru  | -0.000226                 | -0.000390 | -0.000034 |
| 7 C   | 0.000060                  | 0.000049  | 0.000010  |
| 8 H   | 0.000023                  | -0.000075 | -0.000016 |
| 9 N   | 0.000017                  | -0.000104 | -0.000074 |
| 10 H  | -0.000066                 | -0.000005 | 0.000068  |
| 11 C  | -0.000064                 | -0.000064 | 0.000103  |
| 12 C  | 0.000066                  | -0.000001 | 0.000008  |
| 13 C  | 0.000016                  | -0.000068 | -0.000018 |
| 14 C  | -0.000037                 | 0.000016  | 0.000013  |
| 15 C  | 0.000145                  | 0.000100  | -0.000171 |
| 16 C  | 0.000019                  | 0.000014  | 0.000128  |
| 17 C  | 0.000001                  | -0.000112 | 0.000044  |
| 18 C  | -0.000024                 | -0.000004 | -0.000049 |
| 19 H  | 0.000002                  | -0.000026 | 0.000002  |
| 20 H  | -0.000060                 | 0.000022  | 0.000127  |
| 21 C  | 0.000027                  | -0.000028 | -0.000015 |
| 22 H  | 0.000002                  | 0.000023  | -0.000089 |
| 23 C  | -0.000024                 | 0.000030  | -0.000018 |
| 24 H  | 0.000037                  | 0.000030  | -0.000067 |
| 25 H  | 0.000008                  | 0.000012  | -0.000007 |
| 26 Cl | -0.000007                 | -0.000053 | -0.000019 |
| 27 N  | 0.000153                  | 0.000100  | -0.000067 |
| 28 H  | -0.000043                 | -0.000031 | -0.000012 |
| 29 H  | -0.000069                 | -0.000020 | -0.000008 |
| 30 H  | -0.000150                 | 0.000012  | 0.000071  |
| 31 B  | 0.000010                  | -0.000002 | -0.000006 |
| 32 H  | 0.000035                  | -0.000058 | -0.000015 |
| 33 H  | 0.000007                  | 0.000297  | -0.000002 |
| 34 H  | -0.000028                 | -0.000046 | -0.000044 |

-----  
 Geometry Convergence after Step 57  
 -----

|                          |            |                     |   |  |
|--------------------------|------------|---------------------|---|--|
| current energy           |            | -7.90333702 Hartree |   |  |
| abs of energy change     | 0.00008388 | 0.00100000          | T |  |
| constrained gradient max | 0.00038980 | 0.00100000          | T |  |
| constrained gradient rms | 0.00008945 | 0.00066667          | T |  |
| gradient max             | 0.00038980 |                     |   |  |
| gradient rms             | 0.00008945 |                     |   |  |
| cart. step max           | 0.00547879 | 0.01000000          | T |  |
| cart. step rms           | 0.00150080 | 0.00666667          | T |  |

|                                                                 | hartree             | eV         | kcal/mol  | kJ/mol     |
|-----------------------------------------------------------------|---------------------|------------|-----------|------------|
| Pauli Repulsion                                                 |                     |            |           |            |
| Kinetic (Delta T^0):                                            | 86.791910696782011  | 2361.7281  | 54462.75  | 227872.13  |
| Delta V^Pauli Coulomb:                                          | -44.515522643333682 | -1211.3290 | -27933.92 | -116875.49 |
| Delta V^Pauli LDA-XC:                                           | -10.904069785152897 | -296.7148  | -6842.41  | -28628.63  |
| Delta V^Pauli GGA-Exchange:                                     | 0.618357620303602   | 16.8264    | 388.03    | 1623.50    |
| Delta V^Pauli GGA-Correlation:                                  | -0.171938121427853  | -4.6787    | -107.89   | -451.42    |
| Total Pauli Repulsion:                                          | 31.818737767171179  | 865.8319   | 19966.56  | 83540.08   |
| (Total Pauli Repulsion =<br>Delta E^Pauli in BB paper)          |                     |            |           |            |
| Steric Interaction                                              |                     |            |           |            |
| Pauli Repulsion (Delta E^Pauli):                                | 31.818737767171179  | 865.8319   | 19966.56  | 83540.08   |
| Electrostatic Interaction:                                      | -6.637170583062695  | -180.6066  | -4164.89  | -17425.89  |
| (Electrostatic Interaction =<br>Delta V_elstat in the BB paper) |                     |            |           |            |
| Total Steric Interaction:                                       | 25.181567184108484  | 685.2253   | 15801.67  | 66114.20   |
| (Total Steric Interaction =                                     |                     |            |           |            |

Delta E<sup>0</sup> in the BB paper)

|                                    |                     |            |           |            |
|------------------------------------|---------------------|------------|-----------|------------|
| Orbital Interactions               |                     |            |           |            |
| A:                                 | -33.016794176584618 | -898.4327  | -20718.35 | -86685.58  |
|                                    | -----               | -----      | -----     | -----      |
| Total Orbital Interactions:        | -33.020811212916335 | -898.5420  | -20720.87 | -86696.13  |
| Alternative Decomposition Orb.Int. |                     |            |           |            |
| Kinetic:                           | -79.346510883306308 | -2159.1284 | -49790.69 | -208324.23 |
| Coulomb:                           | 42.758703520347751  | 1163.5235  | 26831.49  | 112262.96  |
| XC:                                | 3.566996150042213   | 97.0629    | 2238.32   | 9365.15    |
|                                    | -----               | -----      | -----     | -----      |
| Total Orbital Interactions:        | -33.020811212916342 | -898.5420  | -20720.87 | -86696.13  |
| Residu (E=Steric+OrbInt+Res):      | 0.000000727305502   | 0.0000     | 0.00      | 0.00       |
| Dispersion Energy:                 | -0.064094113258016  | -1.7441    | -40.22    | -168.28    |
| Total Bonding Energy:              | -7.903337414760365  | -215.0608  | -4959.42  | -20750.21  |

Summary of Bonding Energy (energy terms are taken from the energy decomposition above)

|                                 |                    |           |          |           |
|---------------------------------|--------------------|-----------|----------|-----------|
| Electrostatic Energy:           | -6.637170583062695 | -180.6066 | -4164.89 | -17425.89 |
| Kinetic Energy:                 | 7.445399813475703  | 202.5996  | 4672.06  | 19547.89  |
| Coulomb (Steric+OrbInt) Energy: | -1.756818395680426 | -47.8055  | -1102.42 | -4612.53  |
| XC Energy:                      | -6.890654136234935 | -187.5042 | -4323.95 | -18091.41 |
| Dispersion Energy:              | -0.064094113258016 | -1.7441   | -40.22   | -168.28   |
|                                 | -----              | -----     | -----    | -----     |
| Total Bonding Energy:           | -7.903337414760370 | -215.0608 | -4959.42 | -20750.21 |

F R A G M E N T E N E R G Y T E R M S \*\*\* (summed over all fragments) \*\*\*

The energy terms below are (parts of) the Total Energy of the fragments from which the molecule is built.

|                          |                      |            |            |            |
|--------------------------|----------------------|------------|------------|------------|
| Exchange and Correlation |                      |            |            |            |
| Exchange LDA:            | -239.772132870408399 | -6524.5317 | -150459.30 | -629521.65 |
| Exchange GGA:            | -20.771821723475956  | -565.2300  | -13034.52  | -54536.41  |
| Correlation LDA:         | -13.181900252580110  | -358.6978  | -8271.77   | -34609.07  |
| Correlation GGA:         | 6.202731404170991    | 168.7849   | 3892.27    | 16285.27   |
|                          | -----                | -----      | -----      | -----      |
| Total XC:                | -267.523123442293468 | -7279.6746 | -167873.31 | -702381.86 |

Intensities

=====

| Frequency<br>cm-1 | Dipole Strength<br>e-40 esu <sup>2</sup> cm <sup>2</sup> | Absorption Intensity (degeneracy not counted)<br>km/mole |
|-------------------|----------------------------------------------------------|----------------------------------------------------------|
| -----             | -----                                                    | -----                                                    |
| 32.469745         | 368.336807                                               | 2.997796                                                 |
| 46.697926         | 307.503896                                               | 3.599368                                                 |
| 58.924900         | 130.750610                                               | 1.931171                                                 |
| 72.629173         | 46.315557                                                | 0.843172                                                 |
| 85.663649         | 36.199293                                                | 0.777275                                                 |
| 86.607504         | 138.601088                                               | 3.008848                                                 |
| 90.648034         | 24.825598                                                | 0.564074                                                 |
| 107.129997        | 83.564185                                                | 2.243930                                                 |
| 118.401987        | 72.379010                                                | 2.148076                                                 |
| 122.141102        | 27.744639                                                | 0.849413                                                 |
| 134.050273        | 117.388004                                               | 3.944296                                                 |
| 152.071306        | 67.048262                                                | 2.555718                                                 |
| 187.788022        | 6.130200                                                 | 0.288550                                                 |
| 197.717842        | 15.247373                                                | 0.755647                                                 |
| 218.030027        | 44.186173                                                | 2.414798                                                 |
| 229.832988        | 129.300836                                               | 7.448894                                                 |
| 234.769771        | 303.389148                                               | 17.853373                                                |
| 277.393621        | 156.752560                                               | 10.899064                                                |
| 284.594721        | 167.882612                                               | 11.975968                                                |
| 303.518597        | 361.292632                                               | 27.486692                                                |
| 370.793735        | 29.657757                                                | 2.756441                                                 |
| 415.483861        | 37.966365                                                | 3.953951                                                 |
| 425.450758        | 6.471054                                                 | 0.690085                                                 |
| 466.500953        | 8.235094                                                 | 0.962940                                                 |
| 473.668704        | 33.421093                                                | 3.968016                                                 |
| 481.007872        | 14.420095                                                | 1.738595                                                 |
| 493.776191        | 19.358811                                                | 2.396000                                                 |
| 518.743942        | 49.781866                                                | 6.472950                                                 |
| 540.851443        | 20.193708                                                | 2.737614                                                 |
| 555.545760        | 8.533902                                                 | 1.188353                                                 |
| 566.806032        | 191.127716                                               | 27.154149                                                |
| 587.649529        | 135.889754                                               | 20.016271                                                |

|             |             |            |
|-------------|-------------|------------|
| 624.091698  | 26.491895   | 4.144189   |
| 634.161567  | 102.285376  | 16.258914  |
| 638.977632  | 17.716944   | 2.837609   |
| 656.012364  | 4.065868    | 0.668565   |
| 675.699577  | 66.701390   | 11.297090  |
| 705.334766  | 76.587120   | 13.540325  |
| 718.763373  | 55.015796   | 9.911774   |
| 726.457211  | 81.473328   | 14.835547  |
| 735.956982  | 81.758026   | 15.082068  |
| 743.014523  | 350.017737  | 65.187665  |
| 753.311319  | 6.206637    | 1.171950   |
| 786.835365  | 6.161258    | 1.215154   |
| 848.824751  | 2.630054    | 0.559578   |
| 864.383244  | 0.108646    | 0.023540   |
| 921.770239  | 0.459934    | 0.106267   |
| 942.275017  | 89.126444   | 21.050496  |
| 959.557899  | 0.250919    | 0.060351   |
| 967.566498  | 0.145567    | 0.035304   |
| 992.311214  | 0.738558    | 0.183701   |
| 993.463125  | 23.726587   | 5.908335   |
| 1005.723249 | 88.743482   | 22.371393  |
| 1008.429307 | 4.785360    | 1.209590   |
| 1037.566920 | 2.204060    | 0.573215   |
| 1043.293639 | 69.501068   | 18.175071  |
| 1047.619709 | 139.601639  | 36.658294  |
| 1090.357270 | 4.350822    | 1.189100   |
| 1102.214351 | 14.341378   | 3.962187   |
| 1106.489689 | 341.371198  | 94.678707  |
| 1132.200000 | 11.681165   | 3.315029   |
| 1147.827456 | 14.138193   | 4.067697   |
| 1155.446852 | 39.696946   | 11.497016  |
| 1233.160898 | 22.719127   | 7.022463   |
| 1262.857191 | 65.276028   | 20.662651  |
| 1278.724851 | 3.818988    | 1.224062   |
| 1296.689744 | 21.397794   | 6.954776   |
| 1305.550655 | 27.485597   | 8.994499   |
| 1320.617705 | 36.007931   | 11.919371  |
| 1331.972517 | 139.412366  | 46.545171  |
| 1401.926850 | 77.638872   | 27.282404  |
| 1420.228250 | 14.687501   | 5.228584   |
| 1432.808160 | 8.680351    | 3.117478   |
| 1462.376144 | 185.982854  | 68.172634  |
| 1530.586680 | 24.233344   | 9.297140   |
| 1548.746208 | 59.769043   | 23.202492  |
| 1566.248039 | 84.032339   | 32.990209  |
| 1587.449612 | 136.366242  | 54.260638  |
| 1589.732852 | 4.564095    | 1.818683   |
| 1601.577184 | 111.408625  | 44.724424  |
| 1956.075103 | 1146.944091 | 562.348892 |
| 2014.210117 | 1224.416702 | 618.175926 |
| 2186.547023 | 959.649478  | 525.956132 |
| 2464.216928 | 156.633092  | 96.747673  |
| 2544.515893 | 80.108633   | 51.093136  |
| 3056.443751 | 81.143556   | 62.165369  |
| 3078.726354 | 1.689300    | 1.303635   |
| 3085.331056 | 8.445982    | 6.531757   |
| 3093.607164 | 6.788149    | 5.263742   |
| 3096.995002 | 11.577425   | 8.987327   |
| 3109.697167 | 31.190036   | 24.311516  |
| 3122.248511 | 4.944504    | 3.869619   |
| 3129.681238 | 7.178876    | 5.631637   |
| 3258.757891 | 108.392790  | 88.538174  |
| 3389.353422 | 56.943189   | 48.376752  |
| 3450.175645 | 44.635672   | 38.601249  |

Zero-Point Energy : 0.243561 a.u.  
===== 6.627645 eV

P1

Geometry CYCLE 3  
 =====

Energy gradients wrt nuclear displacements  
 =====

| Atom  | Cartesian (a.u./angstrom) |           |           |
|-------|---------------------------|-----------|-----------|
|       | X                         | Y         | Z         |
| 1 O   | 0.000065                  | 0.000008  | 0.000014  |
| 2 O   | 0.000040                  | 0.000069  | 0.000103  |
| 3 C   | -0.000066                 | 0.000205  | -0.000203 |
| 4 C   | -0.000185                 | -0.000177 | -0.000202 |
| 5 H   | 0.000068                  | 0.000024  | 0.000005  |
| 6 Ru  | -0.000257                 | -0.000180 | 0.000314  |
| 7 C   | 0.000050                  | 0.000003  | 0.000022  |
| 8 H   | -0.000040                 | 0.000000  | 0.000001  |
| 9 N   | 0.000158                  | -0.000100 | -0.000150 |
| 10 H  | 0.000028                  | 0.000026  | 0.000036  |
| 11 C  | -0.000075                 | -0.000013 | 0.000063  |
| 12 C  | 0.000025                  | -0.000087 | 0.000010  |
| 13 C  | 0.000047                  | 0.000031  | 0.000225  |
| 14 C  | 0.000019                  | 0.000069  | -0.000061 |
| 15 C  | 0.000010                  | 0.000028  | -0.000026 |
| 16 C  | -0.000026                 | -0.000050 | -0.000273 |
| 17 C  | 0.000025                  | -0.000020 | 0.000043  |
| 18 C  | 0.000014                  | 0.000017  | -0.000076 |
| 19 H  | -0.000028                 | -0.000008 | -0.000041 |
| 20 H  | 0.000003                  | 0.000001  | 0.000011  |
| 21 C  | 0.000066                  | -0.000037 | -0.000009 |
| 22 H  | -0.000038                 | 0.000035  | 0.000013  |
| 23 C  | -0.000072                 | 0.000094  | 0.000093  |
| 24 H  | -0.000007                 | -0.000033 | -0.000015 |
| 25 H  | -0.000005                 | 0.000005  | 0.000047  |
| 26 Cl | 0.000041                  | 0.000046  | -0.000030 |
| 27 N  | -0.000304                 | -0.000245 | -0.000153 |
| 28 H  | 0.000036                  | 0.000094  | 0.000058  |
| 29 H  | 0.000090                  | 0.000068  | 0.000000  |
| 30 H  | 0.000071                  | 0.000027  | 0.000034  |
| 31 B  | 0.000304                  | 0.000221  | 0.000166  |
| 32 H  | -0.000021                 | -0.000014 | 0.000012  |
| 33 H  | -0.000019                 | -0.000112 | -0.000007 |
| 34 H  | -0.000019                 | 0.000003  | -0.000026 |

-----  
 Geometry Convergence after Step 3  
 -----

|                          |            |                     |   |  |
|--------------------------|------------|---------------------|---|--|
| current energy           |            | -7.86812073 Hartree |   |  |
| abs of energy change     | 0.00008740 | 0.00100000          | T |  |
| constrained gradient max | 0.00031438 | 0.00100000          | T |  |
| constrained gradient rms | 0.00010318 | 0.00066667          | T |  |
| gradient max             | 0.00031438 |                     |   |  |
| gradient rms             | 0.00010318 |                     |   |  |
| cart. step max           | 0.00536546 | 0.01000000          | T |  |
| cart. step rms           | 0.00144127 | 0.00666667          | T |  |

|                                                                 | hartree             | eV         | kcal/mol  | kJ/mol     |
|-----------------------------------------------------------------|---------------------|------------|-----------|------------|
| -----                                                           |                     |            |           |            |
| Pauli Repulsion                                                 |                     |            |           |            |
| Kinetic (Delta T^0):                                            | 85.955765073100878  | 2338.9754  | 53938.06  | 225676.83  |
| Delta V^Pauli Coulomb:                                          | -43.875630889014872 | -1193.9167 | -27532.38 | -115195.45 |
| Delta V^Pauli LDA-XC:                                           | -10.789911345903951 | -293.6084  | -6770.77  | -28328.91  |
| Delta V^Pauli GGA-Exchange:                                     | 0.609560908207353   | 16.5870    | 382.51    | 1600.40    |
| Delta V^Pauli GGA-Correlation:                                  | -0.167688644458917  | -4.5630    | -105.23   | -440.27    |
| -----                                                           |                     |            |           |            |
| Total Pauli Repulsion:                                          | 31.732095101930490  | 863.4742   | 19912.19  | 83312.60   |
| (Total Pauli Repulsion =<br>Delta E^Pauli in BB paper)          |                     |            |           |            |
| Steric Interaction                                              |                     |            |           |            |
| Pauli Repulsion (Delta E^Pauli):                                | 31.732095101930490  | 863.4742   | 19912.19  | 83312.60   |
| Electrostatic Interaction:                                      | -6.580110908915994  | -179.0539  | -4129.08  | -17276.08  |
| (Electrostatic Interaction =<br>Delta V_elstat in the BB paper) |                     |            |           |            |
| -----                                                           |                     |            |           |            |
| Total Steric Interaction:                                       | 25.151984193014496  | 684.4203   | 15783.11  | 66036.53   |
| (Total Steric Interaction =<br>Delta E^0 in the BB paper)       |                     |            |           |            |

Electronic Supplementary Information for Dalton Transactions  
This journal is © The Royal Society of Chemistry 2010

|                                    |                     |            |           |            |
|------------------------------------|---------------------|------------|-----------|------------|
| Orbital Interactions               |                     |            |           |            |
| A:                                 | -32.951251277814521 | -896.6492  | -20677.22 | -86513.50  |
|                                    | -----               | -----      | -----     | -----      |
| Total Orbital Interactions:        | -32.955408755099342 | -896.7623  | -20679.83 | -86524.41  |
| Alternative Decomposition Orb.Int. |                     |            |           |            |
| Kinetic:                           | -78.566491391817166 | -2137.9030 | -49301.22 | -206276.29 |
| Coulomb:                           | 42.121656869917103  | 1146.1886  | 26431.74  | 110590.39  |
| XC:                                | 3.489425766800718   | 94.9521    | 2189.65   | 9161.49    |
|                                    | -----               | -----      | -----     | -----      |
| Total Orbital Interactions:        | -32.955408755099342 | -896.7623  | -20679.83 | -86524.41  |
| Residu (E=Steric+OrbInt+Res):      | 0.000001018106926   | 0.0000     | 0.00      | 0.00       |
| Dispersion Energy:                 | -0.064697191164353  | -1.7605    | -40.60    | -169.86    |
| Total Bonding Energy:              | -7.868120735142273  | -214.1025  | -4937.32  | -20657.75  |

Summary of Bonding Energy (energy terms are taken from the energy decomposition above)

|                                 |                    |           |          |           |
|---------------------------------|--------------------|-----------|----------|-----------|
| Electrostatic Energy:           | -6.580110908915994 | -179.0539 | -4129.08 | -17276.08 |
| Kinetic Energy:                 | 7.389273681283711  | 201.0724  | 4636.84  | 19400.54  |
| Coulomb (Steric+OrbInt) Energy: | -1.753973000990840 | -47.7280  | -1100.63 | -4605.06  |
| XC Energy:                      | -6.858613315354797 | -186.6324 | -4303.85 | -18007.29 |
| Dispersion Energy:              | -0.064697191164353 | -1.7605   | -40.60   | -169.86   |
|                                 | -----              | -----     | -----    | -----     |
| Total Bonding Energy:           | -7.868120735142272 | -214.1025 | -4937.32 | -20657.75 |

FRAGMENT ENERGY TERMS \*\*\* (summed over all fragments) \*\*\*

The energy terms below are (parts of) the Total Energy of the fragments from which the molecule is built.

|                          |                      |            |            |            |
|--------------------------|----------------------|------------|------------|------------|
| Exchange and Correlation |                      |            |            |            |
| Exchange LDA:            | -239.772825589670475 | -6524.5506 | -150459.74 | -629523.46 |
| Exchange GGA:            | -20.772118473042227  | -565.2381  | -13034.70  | -54537.19  |
| Correlation LDA:         | -13.181977032669195  | -358.6998  | -8271.82   | -34609.28  |
| Correlation GGA:         | 6.202755231355050    | 168.7856   | 3892.29    | 16285.33   |
|                          | -----                | -----      | -----      | -----      |
| Total XC:                | -267.524165864026827 | -7279.7029 | -167873.97 | -702384.60 |

Intensities  
=====

| Frequency<br>cm-1 | Dipole Strength<br>1e-40 esu2 cm2 | Absorption Intensity (degeneracy not counted)<br>km/mole |
|-------------------|-----------------------------------|----------------------------------------------------------|
| -----             | -----                             | -----                                                    |
| 36.340909         | 22.171139                         | 0.201958                                                 |
| 48.183344         | 174.724021                        | 2.110219                                                 |
| 53.130439         | 231.575483                        | 3.083998                                                 |
| 61.864266         | 50.144627                         | 0.777575                                                 |
| 63.731379         | 80.899152                         | 1.292336                                                 |
| 79.339052         | 46.202456                         | 0.918819                                                 |
| 86.629499         | 281.405917                        | 6.110505                                                 |
| 93.886509         | 34.091647                         | 0.802286                                                 |
| 97.493795         | 65.646149                         | 1.604221                                                 |
| 104.181729        | 70.857947                         | 1.850368                                                 |
| 114.907631        | 38.475088                         | 1.108170                                                 |
| 135.772898        | 142.043222                        | 4.834056                                                 |
| 148.631958        | 29.671549                         | 1.105428                                                 |
| 151.292745        | 484.686665                        | 18.380497                                                |
| 195.615898        | 113.156167                        | 5.548307                                                 |
| 208.459740        | 51.452955                         | 2.688503                                                 |
| 244.163085        | 49.566062                         | 3.033489                                                 |
| 285.991609        | 26.795562                         | 1.920853                                                 |
| 319.345164        | 245.219826                        | 19.628811                                                |
| 330.022788        | 80.144170                         | 6.629701                                                 |
| 353.653422        | 93.596532                         | 8.296897                                                 |
| 360.457105        | 4.612630                          | 0.416754                                                 |
| 411.370392        | 348.576794                        | 35.942607                                                |
| 421.756639        | 43.069875                         | 4.553167                                                 |
| 427.927073        | 326.723423                        | 35.045165                                                |
| 441.115960        | 1224.930562                       | 135.438555                                               |
| 454.149134        | 45.330723                         | 5.160232                                                 |
| 467.141319        | 1748.888027                       | 204.780386                                               |
| 501.485903        | 147.657614                        | 18.560627                                                |
| 506.140057        | 39.258979                         | 4.980670                                                 |
| 540.842968        | 22.723057                         | 3.080463                                                 |
| 567.794637        | 77.351164                         | 11.008704                                                |
| 574.202786        | 218.064768                        | 31.385487                                                |
| 604.514374        | 26.221598                         | 3.973231                                                 |

|             |             |            |
|-------------|-------------|------------|
| 618.944749  | 3.055498    | 0.474037   |
| 647.914177  | 3.276128    | 0.532055   |
| 676.093338  | 9.516267    | 1.612692   |
| 701.239843  | 22.402914   | 3.937759   |
| 730.482041  | 315.207453  | 57.714388  |
| 744.517156  | 83.695141   | 15.618993  |
| 745.804810  | 113.784464  | 21.270917  |
| 770.723887  | 31.398640   | 6.065795   |
| 779.517282  | 152.230420  | 29.744404  |
| 835.875054  | 61.416960   | 12.867902  |
| 853.522901  | 499.286510  | 106.817665 |
| 870.588391  | 1.256713    | 0.274238   |
| 884.028572  | 682.111600  | 151.147096 |
| 918.969788  | 570.386040  | 131.385728 |
| 942.794369  | 3.730086    | 0.881483   |
| 946.630795  | 1.652063    | 0.391999   |
| 963.020814  | 117.936362  | 28.468296  |
| 972.652222  | 10.830017   | 2.640370   |
| 975.924379  | 1.307662    | 0.319882   |
| 998.604157  | 39.159981   | 9.801982   |
| 1008.043144 | 1.422513    | 0.359429   |
| 1013.498273 | 31.057459   | 7.889818   |
| 1020.803752 | 10.777910   | 2.757750   |
| 1038.019949 | 16.902126   | 4.397695   |
| 1059.891517 | 5.297456    | 1.407365   |
| 1070.584892 | 29.251870   | 7.849695   |
| 1085.656215 | 4.765085    | 1.296705   |
| 1098.454587 | 42.818829   | 11.789488  |
| 1130.175804 | 8.443196    | 2.391834   |
| 1138.800628 | 2.076172    | 0.592638   |
| 1150.959742 | 1.615626    | 0.466100   |
| 1248.959346 | 138.119145  | 43.239459  |
| 1250.591421 | 50.023041   | 15.680634  |
| 1269.989015 | 7.646769    | 2.434199   |
| 1291.148034 | 6.509852    | 2.106809   |
| 1304.655624 | 12.333455   | 4.033283   |
| 1336.578488 | 25.991856   | 8.707828   |
| 1411.157107 | 10.428817   | 3.688829   |
| 1427.077675 | 16.412424   | 5.870815   |
| 1448.658065 | 85.324996   | 30.982770  |
| 1477.443015 | 4.245869    | 1.572372   |
| 1535.114064 | 6.578191    | 2.531193   |
| 1553.005450 | 4.501686    | 1.752372   |
| 1569.483008 | 105.551130  | 41.523846  |
| 1576.004317 | 22.282553   | 8.802386   |
| 1588.874070 | 22.725270   | 9.050584   |
| 1796.694552 | 190.778360  | 85.917461  |
| 1958.842356 | 1537.955936 | 755.129521 |
| 2003.540765 | 1467.563644 | 737.009690 |
| 2464.793015 | 126.804881  | 78.341972  |
| 2528.294608 | 161.390194  | 102.278156 |
| 3092.572521 | 0.030927    | 0.023973   |
| 3097.780357 | 46.819291   | 36.354111  |
| 3098.147446 | 11.349849   | 8.813943   |
| 3101.665083 | 9.665970    | 7.514817   |
| 3104.148126 | 7.502458    | 5.837462   |
| 3111.106298 | 1.242227    | 0.968710   |
| 3117.365178 | 6.571838    | 5.135143   |
| 3121.188268 | 11.066188   | 8.657571   |
| 3124.067457 | 6.242264    | 4.888106   |
| 3469.884201 | 19.660598   | 17.099751  |
| 3574.258749 | 10.653402   | 9.544482   |

Zero-Point Energy : 0.239065 a.u.  
===== 6.505287 eV

P2

Geometry CYCLE 20

=====

Energy gradients wrt nuclear displacements

=====

| Atom  | Cartesian (a.u./angstrom) |           |           |
|-------|---------------------------|-----------|-----------|
|       | X                         | Y         | Z         |
| 1 O   | 0.000001                  | 0.000003  | -0.000059 |
| 2 O   | 0.000034                  | -0.000098 | 0.000008  |
| 3 C   | -0.000150                 | 0.000135  | 0.000255  |
| 4 C   | 0.000461                  | 0.000323  | 0.000229  |
| 5 H   | 0.000001                  | -0.000078 | 0.000137  |
| 6 Ru  | -0.000539                 | 0.000481  | 0.000050  |
| 7 C   | -0.000225                 | 0.000458  | -0.000032 |
| 8 H   | -0.000044                 | 0.000001  | 0.000000  |
| 9 N   | 0.000644                  | -0.000698 | -0.000252 |
| 10 H  | -0.000026                 | -0.000043 | 0.000070  |
| 11 C  | 0.000150                  | -0.000043 | -0.000216 |
| 12 C  | -0.000130                 | -0.000080 | -0.000338 |
| 13 C  | 0.000133                  | -0.000172 | 0.000207  |
| 14 C  | -0.000041                 | 0.000083  | 0.000103  |
| 15 C  | 0.000019                  | -0.000053 | 0.000135  |
| 16 C  | 0.000166                  | 0.000351  | 0.000147  |
| 17 C  | -0.000061                 | -0.000048 | 0.000001  |
| 18 C  | 0.000057                  | 0.000013  | -0.000205 |
| 19 H  | 0.000009                  | 0.000007  | -0.000123 |
| 20 H  | 0.000027                  | 0.000053  | 0.000020  |
| 21 C  | -0.000111                 | -0.000298 | -0.000174 |
| 22 H  | -0.000029                 | 0.000010  | -0.000034 |
| 23 C  | -0.000085                 | 0.000104  | 0.000233  |
| 24 H  | 0.000016                  | 0.000008  | -0.000152 |
| 25 H  | -0.000017                 | 0.000014  | 0.000113  |
| 26 Cl | 0.000002                  | -0.000064 | 0.000053  |
| 27 H  | 0.000052                  | 0.000073  | 0.000005  |
| 28 H  | -0.000314                 | -0.000440 | -0.000181 |

-----  
 Geometry Convergence after Step 20

|                          |                     |            |   |
|--------------------------|---------------------|------------|---|
| current energy           | -6.76486361 Hartree |            |   |
| abs of energy change     | 0.00000094          | 0.00100000 | T |
| constrained gradient max | 0.00069804          | 0.00100000 | T |
| constrained gradient rms | 0.00020231          | 0.00066667 | T |
| gradient max             | 0.00069804          |            |   |
| gradient rms             | 0.00020231          |            |   |
| cart. step max           | 0.00943665          | 0.01000000 | T |
| cart. step rms           | 0.00259440          | 0.00666667 | T |

|                                                                 | hartree             | eV         | kcal/mol  | kJ/mol     |
|-----------------------------------------------------------------|---------------------|------------|-----------|------------|
| -----                                                           |                     |            |           |            |
| Pauli Repulsion                                                 |                     |            |           |            |
| Kinetic (Delta T^0):                                            | 76.580293555060095  | 2083.8558  | 48054.86  | 201061.53  |
| Delta V^Pauli Coulomb:                                          | -39.463376310301427 | -1073.8531 | -24763.65 | -103611.08 |
| Delta V^Pauli LDA-XC:                                           | -9.484196161372429  | -258.0781  | -5951.42  | -24900.75  |
| Delta V^Pauli GGA-Exchange:                                     | 0.545207392670925   | 14.8358    | 342.12    | 1431.44    |
| Delta V^Pauli GGA-Correlation:                                  | -0.151299229498385  | -4.1171    | -94.94    | -397.24    |
| -----                                                           |                     |            |           |            |
| Total Pauli Repulsion:                                          | 28.026629246558777  | 762.6434   | 17586.98  | 73583.90   |
| (Total Pauli Repulsion =<br>Delta E^Pauli in BB paper)          |                     |            |           |            |
| Steric Interaction                                              |                     |            |           |            |
| Pauli Repulsion (Delta E^Pauli):                                | 28.026629246558777  | 762.6434   | 17586.98  | 73583.90   |
| Electrostatic Interaction:                                      | -5.934352360386042  | -161.4819  | -3723.86  | -15580.64  |
| (Electrostatic Interaction =<br>Delta V_elstat in the BB paper) |                     |            |           |            |
| -----                                                           |                     |            |           |            |
| Total Steric Interaction:                                       | 22.092276886172733  | 601.1614   | 13863.11  | 58003.26   |
| (Total Steric Interaction =<br>Delta E^0 in the BB paper)       |                     |            |           |            |
| Orbital Interactions                                            |                     |            |           |            |
| A:                                                              | -28.804786981453894 | -783.8181  | -18075.28 | -75626.96  |
| -----                                                           |                     |            |           |            |
| Total Orbital Interactions:                                     | -28.808822018690108 | -783.9279  | -18077.81 | -75637.55  |

|                                    |                     |            |           |            |
|------------------------------------|---------------------|------------|-----------|------------|
| Alternative Decomposition Orb.Int. |                     |            |           |            |
| Kinetic:                           | -70.241330125979204 | -1911.3638 | -44077.10 | -184418.59 |
| Coulomb:                           | 38.218865569138465  | 1039.9882  | 23982.70  | 100343.62  |
| XC:                                | 3.213642538150645   | 87.4477    | 2016.59   | 8437.42    |
|                                    | -----               | -----      | -----     | -----      |
| Total Orbital Interactions:        | -28.808822018690094 | -783.9279  | -18077.81 | -75637.55  |
| Residu (E=Steric+OrbInt+Res):      | 0.000000027038889   | 0.0000     | 0.00      | 0.00       |
| Dispersion Energy:                 | -0.048318543332282  | -1.3148    | -30.32    | -126.86    |
| Total Bonding Energy:              | -6.764863648810769  | -184.0813  | -4245.02  | -17761.15  |

Summary of Bonding Energy (energy terms are taken from the energy decomposition above)  
 =====

|                                 |                    |           |          |           |
|---------------------------------|--------------------|-----------|----------|-----------|
| Electrostatic Energy:           | -5.934352360386042 | -161.4819 | -3723.86 | -15580.64 |
| Kinetic Energy:                 | 6.338963429080891  | 172.4920  | 3977.76  | 16642.95  |
| Coulomb (Steric+OrbInt) Energy: | -1.244510714124075 | -33.8649  | -780.94  | -3267.46  |
| XC Energy:                      | -5.876645460049245 | -159.9117 | -3687.65 | -15429.13 |
| Dispersion Energy:              | -0.048318543332282 | -1.3148   | -30.32   | -126.86   |
|                                 | -----              | -----     | -----    | -----     |
| Total Bonding Energy:           | -6.764863648810753 | -184.0813 | -4245.02 | -17761.15 |

F R A G M E N T E N E R G Y T E R M S \*\*\* (summed over all fragments) \*\*\*

The energy terms below are (parts of) the Total Energy of the fragments from which the molecule is built.

|                          |                      |            |            |            |
|--------------------------|----------------------|------------|------------|------------|
| Exchange and Correlation |                      |            |            |            |
| Exchange LDA:            | -230.014118714909841 | -6259.0026 | -144336.05 | -603901.98 |
| Exchange GGA:            | -19.441420362845818  | -529.0280  | -12199.68  | -51043.44  |
| Correlation LDA:         | -12.269000588485408  | -333.8565  | -7698.91   | -32212.26  |
| Correlation GGA:         | 5.710013552887338    | 155.3774   | 3583.09    | 14991.64   |
|                          | -----                | -----      | -----      | -----      |
| Total XC:                | -256.014526113353725 | -6966.5097 | -160651.56 | -672166.04 |

Intensities  
 =====

| Frequency<br>cm-1 | Dipole Strength<br>e-40 esu <sup>2</sup> cm <sup>2</sup> | Absorption Intensity (degeneracy not counted)<br>km/mole |
|-------------------|----------------------------------------------------------|----------------------------------------------------------|
| -----             | -----                                                    | -----                                                    |
| 31.864282         | 60.651446                                                | 0.484421                                                 |
| 50.480844         | 82.325417                                                | 1.041690                                                 |
| 63.357353         | 56.564035                                                | 0.898288                                                 |
| 75.595442         | 5.375855                                                 | 0.101864                                                 |
| 90.434099         | 19.918950                                                | 0.451520                                                 |
| 95.026468         | 18.555091                                                | 0.441963                                                 |
| 104.084332        | 80.908829                                                | 2.110860                                                 |
| 112.498054        | 12.934836                                                | 0.364741                                                 |
| 134.499969        | 87.205150                                                | 2.939967                                                 |
| 141.676056        | 41.223623                                                | 1.463931                                                 |
| 190.814630        | 30.534632                                                | 1.460436                                                 |
| 203.710907        | 2.207553                                                 | 0.112721                                                 |
| 284.565995        | 13.217789                                                | 0.942801                                                 |
| 319.387936        | 194.549182                                               | 15.574926                                                |
| 328.766914        | 126.130084                                               | 10.394051                                                |
| 350.653894        | 19.616553                                                | 1.724167                                                 |
| 367.464217        | 13.660836                                                | 1.258260                                                 |
| 397.005240        | 82.541492                                                | 8.213847                                                 |
| 421.505849        | 78.508629                                                | 8.294669                                                 |
| 441.769946        | 1.964729                                                 | 0.217559                                                 |
| 449.354808        | 9.209309                                                 | 1.037276                                                 |
| 501.899609        | 43.506713                                                | 5.473324                                                 |
| 506.595733        | 58.276486                                                | 7.400021                                                 |
| 538.616453        | 19.212037                                                | 2.593768                                                 |
| 568.167883        | 82.052249                                                | 11.685445                                                |
| 571.399122        | 134.346455                                               | 19.241718                                                |
| 602.890437        | 28.961338                                                | 4.376582                                                 |
| 618.641277        | 7.130851                                                 | 1.105754                                                 |
| 646.292373        | 6.397955                                                 | 1.036450                                                 |
| 697.686058        | 16.914510                                                | 2.957996                                                 |
| 727.665567        | 367.467166                                               | 67.023706                                                |
| 743.412634        | 5.991924                                                 | 1.116540                                                 |
| 745.619348        | 189.467482                                               | 35.410326                                                |
| 771.788604        | 38.891932                                                | 7.523778                                                 |
| 800.304646        | 242.457562                                               | 48.637265                                                |
| 820.217511        | 33.675411                                                | 6.923409                                                 |
| 867.423151        | 25.145574                                                | 5.467271                                                 |
| 875.348833        | 7.138847                                                 | 1.566345                                                 |



Electronic Supplementary Information for Dalton Transactions  
This journal is © The Royal Society of Chemistry 2010

|             |             |            |
|-------------|-------------|------------|
| 936.769894  | 23.478065   | 5.512813   |
| 940.258042  | 59.384755   | 13.995876  |
| 958.002495  | 4.716987    | 1.132686   |
| 969.278230  | 3.026366    | 0.735272   |
| 979.895944  | 0.535735    | 0.131585   |
| 989.756731  | 3.489092    | 0.865603   |
| 999.414373  | 35.508791   | 8.895278   |
| 1008.002654 | 2.554261    | 0.645364   |
| 1019.314691 | 9.836909    | 2.513304   |
| 1036.906313 | 15.440979   | 4.013215   |
| 1055.409586 | 24.557123   | 6.496457   |
| 1085.844949 | 4.104504    | 1.117137   |
| 1129.769024 | 5.347766    | 1.514398   |
| 1138.398717 | 1.862510    | 0.531461   |
| 1148.430446 | 0.605302    | 0.174243   |
| 1250.130480 | 2.971209    | 0.931036   |
| 1268.062276 | 11.123329   | 3.535521   |
| 1289.036859 | 7.843698    | 2.534336   |
| 1303.039809 | 9.491158    | 3.099952   |
| 1334.617465 | 22.050910   | 7.376687   |
| 1410.688555 | 8.779737    | 3.104493   |
| 1426.146369 | 16.190172   | 5.787535   |
| 1448.060814 | 95.158692   | 34.539284  |
| 1475.581482 | 14.091807   | 5.212042   |
| 1531.239694 | 7.433797    | 2.853198   |
| 1554.031535 | 9.641089    | 3.755467   |
| 1575.924495 | 18.222316   | 7.198086   |
| 1588.607450 | 22.562521   | 8.984259   |
| 1895.083349 | 110.795454  | 52.629389  |
| 1963.312772 | 1615.027546 | 794.781036 |
| 2008.977154 | 1255.694292 | 632.320102 |
| 3092.873958 | 0.721987    | 0.559718   |
| 3097.072134 | 15.287817   | 11.867927  |
| 3100.986513 | 1.835699    | 1.426853   |
| 3101.897306 | 7.024650    | 5.461729   |
| 3110.809815 | 5.078030    | 3.959558   |
| 3117.431059 | 1.580487    | 1.234997   |
| 3117.595414 | 9.658472    | 7.547554   |
| 3123.983176 | 8.975335    | 7.028092   |
| 3126.437869 | 5.576201    | 4.369848   |

Zero-Point Energy : 0.191288 a.u.  
===== 5.205202 eV

P3

Geometry CYCLE 17

=====

Energy gradients wrt nuclear displacements

=====

| Atom  | Cartesian (a.u./angstrom) |           |           |
|-------|---------------------------|-----------|-----------|
|       | X                         | Y         | Z         |
| 1 O   | -0.000181                 | 0.000046  | 0.000014  |
| 2 O   | -0.000011                 | -0.000135 | 0.000004  |
| 3 C   | 0.000221                  | -0.000082 | -0.000162 |
| 4 C   | 0.000004                  | 0.000220  | 0.000217  |
| 5 H   | -0.000022                 | 0.000055  | -0.000004 |
| 6 Ru  | 0.000027                  | 0.000048  | -0.000684 |
| 7 C   | 0.000112                  | -0.000110 | -0.000041 |
| 8 H   | -0.000041                 | 0.000002  | -0.000027 |
| 9 N   | -0.000068                 | 0.000065  | 0.000141  |
| 10 H  | -0.000016                 | -0.000105 | 0.000018  |
| 11 C  | -0.000046                 | -0.000018 | 0.000024  |
| 12 C  | -0.000034                 | -0.000208 | 0.000143  |
| 13 C  | -0.000016                 | -0.000015 | -0.000028 |
| 14 C  | -0.000019                 | 0.000035  | -0.000085 |
| 15 C  | 0.000004                  | 0.000062  | -0.000032 |
| 16 C  | 0.000021                  | 0.000009  | 0.000110  |
| 17 C  | 0.000043                  | -0.000016 | 0.000049  |
| 18 C  | 0.000021                  | 0.000141  | -0.000052 |
| 19 H  | 0.000024                  | 0.000117  | -0.000055 |
| 20 H  | -0.000042                 | -0.000004 | 0.000004  |
| 21 C  | 0.000046                  | 0.000062  | -0.000104 |
| 22 H  | 0.000071                  | -0.000063 | -0.000069 |
| 23 C  | -0.000035                 | -0.000155 | 0.000025  |
| 24 H  | 0.000015                  | 0.000065  | -0.000037 |
| 25 H  | -0.000052                 | -0.000024 | 0.000103  |
| 26 Cl | 0.000000                  | -0.000029 | 0.000098  |
| 27 H  | -0.000095                 | 0.000085  | 0.000483  |
| 28 H  | 0.000072                  | -0.000046 | -0.000056 |

-----  
 Geometry Convergence after Step 17

|                                                                 |                     |            |           |            |
|-----------------------------------------------------------------|---------------------|------------|-----------|------------|
| current energy                                                  | -6.77013550 Hartree |            |           |            |
| abs of energy change                                            | 0.00000137          | 0.00100000 | T         |            |
| constrained gradient max                                        | 0.00068415          | 0.00100000 | T         |            |
| constrained gradient rms                                        | 0.00012263          | 0.00066667 | T         |            |
| gradient max                                                    | 0.00068415          |            |           |            |
| gradient rms                                                    | 0.00012263          |            |           |            |
| cart. step max                                                  | 0.00488538          | 0.01000000 | T         |            |
| cart. step rms                                                  | 0.00151361          | 0.00666667 | T         |            |
|                                                                 | hartree             | eV         | kcal/mol  | kJ/mol     |
| -----                                                           |                     |            |           |            |
| <b>Pauli Repulsion</b>                                          |                     |            |           |            |
| Kinetic (Delta T^0):                                            | 77.262294152518734  | 2102.4140  | 48482.83  | 202852.12  |
| Delta V^Pauli Coulomb:                                          | -39.890948303662952 | -1085.4879 | -25031.95 | -104733.67 |
| Delta V^Pauli LDA-XC:                                           | -9.563506329080560  | -260.2362  | -6001.19  | -25108.98  |
| Delta V^Pauli GGA-Exchange:                                     | 0.544919447776742   | 14.8280    | 341.94    | 1430.69    |
| Delta V^Pauli GGA-Correlation:                                  | -0.151238978985826  | -4.1154    | -94.90    | -397.08    |
| -----                                                           |                     |            |           |            |
| Total Pauli Repulsion:                                          | 28.201519988566137  | 767.4024   | 17696.72  | 74043.08   |
| (Total Pauli Repulsion =<br>Delta E^Pauli in BB paper)          |                     |            |           |            |
| <b>Steric Interaction</b>                                       |                     |            |           |            |
| Pauli Repulsion (Delta E^Pauli):                                | 28.201519988566137  | 767.4024   | 17696.72  | 74043.08   |
| Electrostatic Interaction:                                      | -5.985052499497008  | -162.8616  | -3755.68  | -15713.75  |
| (Electrostatic Interaction =<br>Delta V_elstat in the BB paper) |                     |            |           |            |
| -----                                                           |                     |            |           |            |
| Total Steric Interaction:                                       | 22.216467489069128  | 604.5408   | 13941.05  | 58329.33   |
| (Total Steric Interaction =<br>Delta E^0 in the BB paper)       |                     |            |           |            |
| <b>Orbital Interactions</b>                                     |                     |            |           |            |
| A:                                                              | -28.936897326653000 | -787.4130  | -18158.18 | -75973.81  |
| -----                                                           |                     |            |           |            |
| Total Orbital Interactions:                                     | -28.940625295091532 | -787.5145  | -18160.52 | -75983.60  |

Electronic Supplementary Information for Dalton Transactions  
This journal is © The Royal Society of Chemistry 2010

| Alternative Decomposition Orb.Int. |                     |            |           |            |
|------------------------------------|---------------------|------------|-----------|------------|
| Kinetic:                           | -70.878585013313881 | -1928.7044 | -44476.99 | -186091.70 |
| Coulomb:                           | 38.647328312380893  | 1051.6473  | 24251.57  | 101468.55  |
| XC:                                | 3.290631405841466   | 89.5426    | 2064.90   | 8639.55    |
| -----                              |                     |            |           |            |
| Total Orbital Interactions:        | -28.940625295091522 | -787.5145  | -18160.52 | -75983.60  |
|                                    |                     |            |           |            |
| Residu (E=Steric+OrbInt+Res):      | 0.000001152610070   | 0.0000     | 0.00      | 0.00       |
| Dispersion Energy:                 | -0.045978851379637  | -1.2511    | -28.85    | -120.72    |
|                                    |                     |            |           |            |
| Total Bonding Energy:              | -6.770135504791972  | -184.2248  | -4248.32  | -17774.99  |

Summary of Bonding Energy (energy terms are taken from the energy decomposition above)

|                                 |                    |           |          |           |
|---------------------------------|--------------------|-----------|----------|-----------|
| =====                           |                    |           |          |           |
| Electrostatic Energy:           | -5.985052499497008 | -162.8616 | -3755.68 | -15713.75 |
| Kinetic Energy:                 | 6.383709139204853  | 173.7096  | 4005.84  | 16760.43  |
| Coulomb (Steric+OrbInt) Energy: | -1.243618838671992 | -33.8406  | -780.38  | -3265.12  |
| XC Energy:                      | -5.879194454448179 | -159.9810 | -3689.25 | -15435.82 |
| Dispersion Energy:              | -0.045978851379637 | -1.2511   | -28.85   | -120.72   |
| -----                           |                    |           |          |           |
| Total Bonding Energy:           | -6.770135504791963 | -184.2248 | -4248.32 | -17774.99 |

FRAGMENT ENERGY TERMS \*\*\* (summed over all fragments) \*\*\*

The energy terms below are (parts of) the Total Energy of the fragments from which the molecule is built.

| Exchange and Correlation |                      |            |            |            |
|--------------------------|----------------------|------------|------------|------------|
| Exchange LDA:            | -230.014149648963553 | -6259.0035 | -144336.07 | -603902.06 |
| Exchange GGA:            | -19.441417164273716  | -529.0279  | -12199.67  | -51043.43  |
| Correlation LDA:         | -12.269003481999095  | -333.8566  | -7698.92   | -32212.26  |
| Correlation GGA:         | 5.709984160797609    | 155.3766   | 3583.07    | 14991.56   |
| -----                    |                      |            |            |            |
| Total XC:                | -256.014586134438787 | -6966.5113 | -160651.60 | -672166.20 |

Intensities

=====

| Frequency<br>cm-1 | Dipole Strength<br>1e-40 esu2 cm2 | Absorption Intensity (degeneracy not counted)<br>km/mole |
|-------------------|-----------------------------------|----------------------------------------------------------|
| -----             |                                   |                                                          |
| 42.410768         | 44.508081                         | 0.473144                                                 |
| 53.797674         | 23.805239                         | 0.321007                                                 |
| 69.598993         | 13.243614                         | 0.231040                                                 |
| 76.287204         | 4.478579                          | 0.085639                                                 |
| 84.357655         | 21.549557                         | 0.455660                                                 |
| 94.774191         | 51.779627                         | 1.230062                                                 |
| 113.170928        | 43.757326                         | 1.241263                                                 |
| 134.953656        | 25.244410                         | 0.853941                                                 |
| 166.393538        | 2.532752                          | 0.105635                                                 |
| 171.380265        | 108.241964                        | 4.649803                                                 |
| 207.699784        | 22.967927                         | 1.195738                                                 |
| 232.781441        | 17.110166                         | 0.998345                                                 |
| 272.448685        | 1.290497                          | 0.088129                                                 |
| 316.290564        | 257.405631                        | 20.407150                                                |
| 349.893901        | 47.106491                         | 4.131381                                                 |
| 365.772797        | 37.726470                         | 3.458881                                                 |
| 378.213624        | 82.831271                         | 7.852529                                                 |
| 402.260117        | 8.253083                          | 0.832149                                                 |
| 412.669105        | 98.080822                         | 10.145282                                                |
| 441.669565        | 29.174201                         | 3.229792                                                 |
| 454.221722        | 3.216174                          | 0.366172                                                 |
| 478.675128        | 5.466948                          | 0.655940                                                 |
| 512.975298        | 99.506156                         | 12.794534                                                |
| 548.799118        | 8.670567                          | 1.192721                                                 |
| 567.086864        | 83.351817                         | 11.847937                                                |
| 572.435092        | 104.861774                        | 15.046016                                                |
| 614.617201        | 60.022847                         | 9.246968                                                 |
| 621.129888        | 11.227124                         | 1.747950                                                 |
| 647.497287        | 2.202117                          | 0.357402                                                 |
| 708.304279        | 68.928345                         | 12.237587                                                |
| 726.126192        | 192.899132                        | 35.109160                                                |
| 742.344029        | 369.542858                        | 68.761937                                                |
| 748.692899        | 19.117025                         | 3.587584                                                 |
| 781.412556        | 13.022543                         | 2.550670                                                 |
| 805.209758        | 182.012478                        | 36.735695                                                |
| 809.789869        | 372.211300                        | 75.550956                                                |
| 852.295786        | 2.060568                          | 0.440205                                                 |
| 870.386416        | 2.303881                          | 0.502632                                                 |
| 932.329975        | 5.198758                          | 1.214919                                                 |

Electronic Supplementary Information for Dalton Transactions  
This journal is © The Royal Society of Chemistry 2010

|             |             |            |
|-------------|-------------|------------|
| 951.002847  | 26.186259   | 6.242138   |
| 964.553167  | 2.849808    | 0.689001   |
| 967.793625  | 4.407196    | 1.069112   |
| 972.368954  | 45.354621   | 11.054286  |
| 983.260214  | 2.904588    | 0.715865   |
| 997.649557  | 13.313758   | 3.329329   |
| 1011.547451 | 3.528875    | 0.894748   |
| 1035.812125 | 7.830272    | 2.032993   |
| 1046.334855 | 39.717710   | 10.416767  |
| 1093.811481 | 5.430213    | 1.488804   |
| 1109.752961 | 4.454293    | 1.239034   |
| 1135.175122 | 7.545813    | 2.147074   |
| 1147.743639 | 9.280404    | 2.669868   |
| 1238.025770 | 3.772085    | 1.170548   |
| 1270.785680 | 12.738779   | 4.057684   |
| 1280.662759 | 25.323461   | 8.128977   |
| 1301.576348 | 7.432102    | 2.424708   |
| 1325.662493 | 10.932713   | 3.632779   |
| 1399.427416 | 17.026844   | 5.972589   |
| 1430.176903 | 26.568722   | 9.524419   |
| 1435.332223 | 74.559414   | 26.824584  |
| 1459.660611 | 146.898423  | 53.746117  |
| 1495.381908 | 111.172618  | 41.670434  |
| 1542.830625 | 15.064351   | 5.825682   |
| 1560.237293 | 35.176446   | 13.756903  |
| 1582.929767 | 76.416012   | 30.319643  |
| 1591.473587 | 32.107157   | 12.807942  |
| 1916.979002 | 100.017058  | 48.058422  |
| 1974.198623 | 1679.394153 | 831.039280 |
| 2035.568520 | 1069.505410 | 545.690988 |
| 2103.173019 | 159.817666  | 84.251541  |
| 3083.274877 | 55.290627   | 42.730879  |
| 3094.011207 | 0.339888    | 0.263594   |
| 3098.948715 | 4.322405    | 3.357514   |
| 3101.411482 | 1.851117    | 1.439035   |
| 3111.040321 | 4.528097    | 3.531014   |
| 3119.900308 | 11.490186   | 8.985574   |
| 3121.425384 | 9.382769    | 7.341116   |
| 3129.285970 | 6.263939    | 4.913273   |

Zero-Point Energy : 0.190458 a.u.  
===== 5.182622 eV

P3'

Geometry CYCLE 18

=====

Energy gradients wrt nuclear displacements

=====

| Atom  | Cartesian (a.u./angstrom) |           |           |
|-------|---------------------------|-----------|-----------|
|       | X                         | Y         | Z         |
| 1 O   | -0.000239                 | 0.000224  | -0.000131 |
| 2 O   | -0.000112                 | 0.000085  | 0.000035  |
| 3 C   | 0.000511                  | -0.000567 | 0.000328  |
| 4 C   | 0.000235                  | 0.000370  | 0.000126  |
| 5 H   | -0.000050                 | -0.000059 | 0.000025  |
| 6 Ru  | -0.000602                 | 0.000125  | -0.000225 |
| 7 C   | 0.000074                  | 0.000042  | -0.000047 |
| 8 H   | 0.000081                  | -0.000016 | -0.000017 |
| 9 N   | -0.000060                 | 0.000108  | 0.000334  |
| 10 H  | -0.000030                 | 0.000009  | 0.000018  |
| 11 C  | -0.000010                 | 0.000013  | 0.000034  |
| 12 C  | -0.000095                 | 0.000008  | -0.000007 |
| 13 C  | 0.000052                  | -0.000060 | 0.000029  |
| 14 C  | 0.000045                  | -0.000281 | -0.000468 |
| 15 C  | -0.000046                 | -0.000011 | -0.000105 |
| 16 C  | 0.000320                  | 0.000102  | 0.000023  |
| 17 C  | -0.000006                 | -0.000095 | 0.000079  |
| 18 C  | 0.000032                  | 0.000023  | -0.000024 |
| 19 H  | 0.000042                  | 0.000025  | -0.000032 |
| 20 H  | 0.000014                  | -0.000052 | 0.000056  |
| 21 C  | 0.000059                  | 0.000113  | -0.000170 |
| 22 H  | -0.000023                 | 0.000043  | -0.000013 |
| 23 C  | -0.000033                 | -0.000076 | 0.000103  |
| 24 H  | 0.000005                  | 0.000004  | 0.000003  |
| 25 H  | -0.000043                 | -0.000060 | 0.000011  |
| 26 Cl | 0.000034                  | 0.000151  | -0.000039 |
| 27 H  | -0.000031                 | -0.000068 | 0.000047  |
| 28 H  | 0.000010                  | 0.000000  | 0.000037  |
| 29 O  | -0.000216                 | 0.000073  | 0.000035  |
| 30 C  | 0.000111                  | 0.000114  | -0.000021 |
| 31 C  | -0.000039                 | -0.000117 | 0.000180  |
| 32 C  | -0.000005                 | 0.000090  | -0.000212 |
| 33 C  | 0.000053                  | -0.000136 | 0.000034  |
| 34 H  | -0.000072                 | -0.000024 | 0.000023  |
| 35 H  | -0.000008                 | -0.000010 | 0.000030  |
| 36 H  | 0.000024                  | 0.000080  | -0.000085 |
| 37 H  | 0.000125                  | -0.000092 | -0.000025 |
| 38 H  | -0.000093                 | -0.000192 | -0.000011 |
| 39 H  | -0.000102                 | 0.000086  | 0.000109  |
| 40 H  | 0.000069                  | 0.000038  | 0.000045  |
| 41 H  | 0.000020                  | -0.000012 | -0.000108 |

-----  
 Geometry Convergence after Step 18

|                          |                     |            |   |
|--------------------------|---------------------|------------|---|
| current energy           | -9.39713963 Hartree |            |   |
| abs of energy change     | 0.00001416          | 0.00100000 | T |
| constrained gradient max | 0.00060220          | 0.00100000 | T |
| constrained gradient rms | 0.00014384          | 0.00066667 | T |
| gradient max             | 0.00060220          |            |   |
| gradient rms             | 0.00014384          |            |   |
| cart. step max           | 0.00560085          | 0.01000000 | T |
| cart. step rms           | 0.00150482          | 0.00666667 | T |

|                                                        | hartree             | eV         | kcal/mol  | kJ/mol     |
|--------------------------------------------------------|---------------------|------------|-----------|------------|
|                                                        | -----               | -----      | -----     | -----      |
| Pauli Repulsion                                        |                     |            |           |            |
| Kinetic (Delta T^0):                                   | 100.327691302913394 | 2730.0554  | 62956.58  | 263410.32  |
| Delta V^Pauli Coulomb:                                 | -51.016347429371507 | -1388.2254 | -32013.24 | -133943.40 |
| Delta V^Pauli LDA-XC:                                  | -12.776958868988840 | -347.6787  | -8017.66  | -33545.90  |
| Delta V^Pauli GGA-Exchange:                            | 0.748277029703068   | 20.3617    | 469.55    | 1964.60    |
| Delta V^Pauli GGA-Correlation:                         | -0.210766527561137  | -5.7352    | -132.26   | -553.37    |
| Total Pauli Repulsion:                                 | 37.071895506694972  | 1008.7776  | 23262.97  | 97332.25   |
| (Total Pauli Repulsion =<br>Delta E^Pauli in BB paper) |                     |            |           |            |
| Steric Interaction                                     |                     |            |           |            |
| Pauli Repulsion (Delta E^Pauli):                       | 37.071895506694972  | 1008.7776  | 23262.97  | 97332.25   |

Electronic Supplementary Information for Dalton Transactions  
 This journal is © The Royal Society of Chemistry 2010

|                                                                                               |                     |            |           |            |
|-----------------------------------------------------------------------------------------------|---------------------|------------|-----------|------------|
| Electrostatic Interaction:<br>(Electrostatic Interaction =<br>Delta V_elstat in the BB paper) | -7.731215596348071  | -210.3771  | -4851.41  | -20298.30  |
| -----                                                                                         |                     |            |           |            |
| Total Steric Interaction:<br>(Total Steric Interaction =<br>Delta E^0 in the BB paper)        | 29.340679910346900  | 798.4005   | 18411.56  | 77033.94   |
| -----                                                                                         |                     |            |           |            |
| Orbital Interactions                                                                          |                     |            |           |            |
| A:                                                                                            | -38.654775671089062 | -1051.8500 | -24256.24 | -101488.10 |
| -----                                                                                         |                     |            |           |            |
| Total Orbital Interactions:                                                                   | -38.659948889003594 | -1051.9907 | -24259.49 | -101501.68 |
| -----                                                                                         |                     |            |           |            |
| Alternative Decomposition Orb.Int.                                                            |                     |            |           |            |
| Kinetic:                                                                                      | -91.462430434613822 | -2488.8194 | -57393.55 | -240134.58 |
| Coulomb:                                                                                      | 48.823574904742649  | 1328.5571  | 30637.26  | 128186.28  |
| XC:                                                                                           | 3.978906640867541   | 108.2716   | 2496.80   | 10446.62   |
| -----                                                                                         |                     |            |           |            |
| Total Orbital Interactions:                                                                   | -38.659948889003630 | -1051.9907 | -24259.49 | -101501.68 |
| -----                                                                                         |                     |            |           |            |
| Residu (E=Steric+OrbInt+Res):                                                                 | 0.000007532819981   | 0.0002     | 0.00      | 0.02       |
| Dispersion Energy:                                                                            | -0.077878280695046  | -2.1192    | -48.87    | -204.47    |
| -----                                                                                         |                     |            |           |            |
| Total Bonding Energy:                                                                         | -9.397139726531758  | -255.7092  | -5896.79  | -24672.19  |

Summary of Bonding Energy (energy terms are taken from the energy decomposition above)

|                                 |                    |           |          |           |
|---------------------------------|--------------------|-----------|----------|-----------|
| Electrostatic Energy:           | -7.731215596348071 | -210.3771 | -4851.41 | -20298.30 |
| Kinetic Energy:                 | 8.865260868299572  | 241.2360  | 5563.04  | 23275.74  |
| Coulomb (Steric+OrbInt) Energy: | -2.192764991808879 | -59.6682  | -1375.98 | -5757.10  |
| XC Energy:                      | -8.260541725979369 | -224.7808 | -5183.57 | -21688.05 |
| Dispersion Energy:              | -0.077878280695046 | -2.1192   | -48.87   | -204.47   |
| -----                           |                    |           |          |           |
| Total Bonding Energy:           | -9.397139726531792 | -255.7092 | -5896.79 | -24672.19 |

F R A G M E N T E N E R G Y T E R M S \*\*\* (summed over all fragments) \*\*\*

The energy terms below are (parts of) the Total Energy of the fragments from which the molecule is built.

|                          |                      |            |            |            |
|--------------------------|----------------------|------------|------------|------------|
| Exchange and Correlation |                      |            |            |            |
| Exchange LDA:            | -256.380689976517772 | -6976.4735 | -160881.33 | -673127.41 |
| Exchange GGA:            | -22.918679845574701  | -623.6490  | -14381.69  | -60172.99  |
| Correlation LDA:         | -14.630502662701588  | -398.1162  | -9180.78   | -38412.38  |
| Correlation GGA:         | 6.964182981116700    | 189.5051   | 4370.09    | 18284.46   |
| -----                    |                      |            |            |            |
| Total XC:                | -286.965689503677311 | -7808.7337 | -180073.71 | -753428.31 |

Intensities  
 =====

| Frequency<br>cm-1 | Dipole Strength<br>1e-40 esu2 cm2 | Absorption Intensity (degeneracy not counted)<br>km/mole |
|-------------------|-----------------------------------|----------------------------------------------------------|
| -----             | -----                             | -----                                                    |
| 7.879027          | 258.301734                        | 0.510127                                                 |
| 24.857742         | 218.394028                        | 1.360757                                                 |
| 49.629045         | 21.040008                         | 0.261734                                                 |
| 50.213245         | 7.173508                          | 0.090288                                                 |
| 57.427078         | 46.986378                         | 0.676343                                                 |
| 71.465516         | 21.770674                         | 0.389984                                                 |
| 72.937977         | 30.158089                         | 0.551360                                                 |
| 87.230228         | 13.001006                         | 0.284264                                                 |
| 88.337662         | 11.759495                         | 0.260383                                                 |
| 96.828593         | 22.958471                         | 0.557217                                                 |
| 100.393018        | 9.534105                          | 0.239917                                                 |
| 105.152905        | 7.253020                          | 0.191169                                                 |
| 115.818347        | 64.949536                         | 1.885521                                                 |
| 158.758044        | 30.530842                         | 1.214934                                                 |
| 175.728692        | 26.057458                         | 1.147765                                                 |
| 177.572334        | 17.723813                         | 0.788879                                                 |
| 200.363225        | 20.735255                         | 1.041371                                                 |
| 204.811606        | 12.987876                         | 0.666762                                                 |
| 217.951738        | 25.971468                         | 1.418845                                                 |
| 285.550050        | 6.613491                          | 0.473359                                                 |
| 312.720636        | 206.112573                        | 16.156195                                                |
| 323.364397        | 159.732114                        | 12.946802                                                |
| 341.835689        | 23.208261                         | 1.988557                                                 |
| 349.766182        | 107.187681                        | 9.397250                                                 |
| 392.966200        | 26.317225                         | 2.592229                                                 |
| 406.760534        | 2.456279                          | 0.250435                                                 |

|             |             |            |
|-------------|-------------|------------|
| 424.437565  | 23.762234   | 2.528012   |
| 442.343919  | 80.932109   | 8.973440   |
| 454.058204  | 47.146049   | 5.365805   |
| 519.500424  | 112.221117  | 14.612972  |
| 529.176884  | 33.347327   | 4.423235   |
| 543.731395  | 23.222788   | 3.165023   |
| 570.492978  | 63.126950   | 9.026995   |
| 583.490088  | 123.190336  | 18.017237  |
| 598.775907  | 9.543854    | 1.432406   |
| 615.015887  | 0.583645    | 0.089973   |
| 625.929134  | 16.706369   | 2.621110   |
| 638.506516  | 0.510976    | 0.081779   |
| 675.642971  | 57.632371   | 9.760270   |
| 692.390795  | 241.196460  | 41.860102  |
| 741.367554  | 172.222740  | 32.003844  |
| 744.131494  | 59.257032   | 11.052681  |
| 749.681703  | 41.438540   | 7.786807   |
| 771.909447  | 62.899646   | 12.170057  |
| 774.421743  | 21.950027   | 4.260795   |
| 826.768438  | 3.837587    | 0.795280   |
| 831.113155  | 23.669349   | 4.930881   |
| 840.081279  | 170.225276  | 35.844574  |
| 865.615794  | 0.949491    | 0.206013   |
| 874.610765  | 21.472279   | 4.707291   |
| 876.484925  | 516.556672  | 113.485532 |
| 899.131061  | 12.979744   | 2.925278   |
| 901.873885  | 18.105957   | 4.093034   |
| 913.554381  | 0.199375    | 0.045654   |
| 928.049687  | 54.389746   | 12.652208  |
| 947.072136  | 0.686958    | 0.163076   |
| 950.955019  | 5.036190    | 1.200439   |
| 971.297169  | 0.914975    | 0.222761   |
| 974.834312  | 1.298186    | 0.317209   |
| 988.621610  | 0.688337    | 0.170573   |
| 993.042928  | 7.671684    | 1.909575   |
| 1007.181727 | 30.912981   | 7.804171   |
| 1009.480289 | 61.677776   | 15.606468  |
| 1012.189580 | 65.785758   | 16.690595  |
| 1033.302860 | 2.895058    | 0.749830   |
| 1060.720436 | 23.951890   | 6.368231   |
| 1062.328247 | 32.998964   | 8.786929   |
| 1088.533970 | 1.498611    | 0.408892   |
| 1105.238328 | 1.022966    | 0.283397   |
| 1131.958609 | 2.088402    | 0.592547   |
| 1135.763416 | 10.273406   | 2.924694   |
| 1155.053207 | 0.093340    | 0.027024   |
| 1163.344026 | 7.301437    | 2.129093   |
| 1172.855487 | 10.965531   | 3.223682   |
| 1203.812579 | 14.069179   | 4.245274   |
| 1226.170395 | 28.210675   | 8.670465   |
| 1251.939855 | 9.181918    | 2.881343   |
| 1258.671553 | 15.129729   | 4.773332   |
| 1270.774811 | 8.251065    | 2.628189   |
| 1272.893272 | 15.967526   | 5.094572   |
| 1290.545122 | 5.407335    | 1.749180   |
| 1297.957603 | 1.938142    | 0.630557   |
| 1305.572865 | 2.572502    | 0.841850   |
| 1325.193732 | 2.885370    | 0.958427   |
| 1328.943654 | 43.528801   | 14.499778  |
| 1407.308007 | 37.871588   | 13.359209  |
| 1429.024415 | 17.141724   | 6.140055   |
| 1433.270062 | 1.872813    | 0.672822   |
| 1447.438764 | 24.465067   | 8.876151   |
| 1451.565225 | 11.253436   | 4.094490   |
| 1458.721709 | 90.629090   | 33.137378  |
| 1467.096418 | 12.289003   | 4.519115   |
| 1485.939856 | 6.772522    | 2.522492   |
| 1546.708523 | 42.050790   | 16.302744  |
| 1567.054950 | 1.002831    | 0.393904   |
| 1584.178251 | 29.170301   | 11.583053  |
| 1595.922634 | 5.765494    | 2.306356   |
| 1862.037820 | 59.414075   | 27.730386  |
| 1944.502711 | 1812.927548 | 883.623122 |
| 1995.238421 | 1158.128682 | 579.201512 |
| 2931.760597 | 25.770929   | 18.938111  |
| 2960.530273 | 15.215207   | 11.290819  |
| 2964.410884 | 23.588064   | 17.527047  |
| 2975.546925 | 45.887518   | 34.224684  |
| 3014.284628 | 6.353003    | 4.800002   |
| 3030.135606 | 26.203000   | 19.901745  |
| 3047.472870 | 0.936956    | 0.715710   |
| 3052.397992 | 10.147395   | 7.763790   |
| 3081.435146 | 6.523001    | 5.038236   |
| 3092.974663 | 4.595439    | 3.562718   |
| 3093.577999 | 6.077166    | 4.712379   |

Electronic Supplementary Information for Dalton Transactions  
This journal is © The Royal Society of Chemistry 2010

|             |           |           |
|-------------|-----------|-----------|
| 3100.728535 | 11.863956 | 9.220858  |
| 3113.876129 | 0.821113  | 0.640888  |
| 3114.151371 | 13.555928 | 10.581496 |
| 3120.076749 | 3.680527  | 2.878414  |
| 3133.426502 | 2.120796  | 1.665699  |
| 3152.931121 | 14.948336 | 11.813686 |

Zero-Point Energy : 0.306597 a.u.  
===== 8.342933 eV



P4

Geometry CYCLE 10

=====

Energy gradients wrt nuclear displacements

=====

| Atom  | Cartesian (a.u./angstrom) |           |           |
|-------|---------------------------|-----------|-----------|
|       | X                         | Y         | Z         |
| 1 O   | 0.000021                  | -0.000021 | 0.000133  |
| 2 O   | -0.000241                 | -0.000155 | 0.000028  |
| 3 C   | -0.000214                 | 0.000108  | -0.000086 |
| 4 C   | 0.000803                  | 0.000485  | -0.000085 |
| 5 H   | -0.000133                 | -0.000004 | -0.000058 |
| 6 Ru  | 0.000318                  | -0.000051 | 0.000062  |
| 7 C   | 0.000004                  | -0.000034 | -0.000018 |
| 8 H   | 0.000048                  | 0.000028  | 0.000023  |
| 9 N   | -0.000047                 | 0.000001  | 0.000072  |
| 10 H  | -0.000036                 | -0.000008 | -0.000023 |
| 11 C  | 0.000045                  | 0.000009  | -0.000008 |
| 12 C  | -0.000077                 | -0.000286 | 0.000712  |
| 13 C  | -0.000169                 | -0.000028 | -0.000210 |
| 14 C  | 0.000044                  | 0.000023  | 0.000013  |
| 15 C  | -0.000074                 | 0.000036  | 0.000014  |
| 16 C  | 0.000085                  | 0.000052  | -0.000118 |
| 17 C  | -0.000034                 | -0.000006 | -0.000020 |
| 18 C  | 0.000200                  | -0.000007 | 0.000018  |
| 19 H  | 0.000047                  | 0.000039  | 0.000018  |
| 20 H  | 0.000026                  | -0.000057 | -0.000025 |
| 21 C  | -0.000026                 | 0.000042  | 0.000022  |
| 22 H  | -0.000023                 | 0.000006  | -0.000033 |
| 23 C  | -0.000099                 | -0.000069 | 0.000021  |
| 24 H  | 0.000065                  | 0.000005  | 0.000017  |
| 25 H  | -0.000096                 | -0.000004 | -0.000062 |
| 26 Cl | -0.000200                 | -0.000122 | 0.000050  |
| 27 H  | -0.000547                 | -0.000298 | -0.000141 |
| 28 H  | 0.000311                  | 0.000316  | -0.000316 |

-----  
 Geometry Convergence after Step 10

|                          |                     |            |   |
|--------------------------|---------------------|------------|---|
| current energy           | -6.78168500 Hartree |            |   |
| abs of energy change     | 0.00006813          | 0.00100000 | T |
| constrained gradient max | 0.00080309          | 0.00100000 | T |
| constrained gradient rms | 0.00018095          | 0.00066667 | T |
| gradient max             | 0.00080309          |            |   |
| gradient rms             | 0.00018095          |            |   |
| cart. step max           | 0.00675576          | 0.01000000 | T |
| cart. step rms           | 0.00173002          | 0.00666667 | T |

|                                                                 | hartree             | eV         | kcal/mol  | kJ/mol     |
|-----------------------------------------------------------------|---------------------|------------|-----------|------------|
|                                                                 | -----               | -----      | -----     | -----      |
| <b>Pauli Repulsion</b>                                          |                     |            |           |            |
| Kinetic (Delta T^0):                                            | 77.308817077885138  | 2103.6799  | 48512.02  | 202974.27  |
| Delta V^Pauli Coulomb:                                          | -40.021469289098583 | -1089.0396 | -25113.85 | -105076.35 |
| Delta V^Pauli LDA-XC:                                           | -9.558810614972582  | -260.1085  | -5998.24  | -25096.65  |
| Delta V^Pauli GGA-Exchange:                                     | 0.543476268201488   | 14.7887    | 341.04    | 1426.90    |
| Delta V^Pauli GGA-Correlation:                                  | -0.150912918880764  | -4.1065    | -94.70    | -396.22    |
| Total Pauli Repulsion:                                          | 28.121100523134697  | 765.2141   | 17646.26  | 73831.94   |
| (Total Pauli Repulsion =<br>Delta E^Pauli in BB paper)          |                     |            |           |            |
| <b>Steric Interaction</b>                                       |                     |            |           |            |
| Pauli Repulsion (Delta E^Pauli):                                | 28.121100523134697  | 765.2141   | 17646.26  | 73831.94   |
| Electrostatic Interaction:                                      | -5.941127213025312  | -161.6663  | -3728.11  | -15598.43  |
| (Electrostatic Interaction =<br>Delta V_elstat in the BB paper) |                     |            |           |            |
| Total Steric Interaction:                                       | 22.179973310109386  | 603.5478   | 13918.14  | 58233.51   |
| (Total Steric Interaction =<br>Delta E^0 in the BB paper)       |                     |            |           |            |
| <b>Orbital Interactions</b>                                     |                     |            |           |            |
| A:                                                              | -28.912611104040423 | -786.7522  | -18142.94 | -75910.05  |
| Total Orbital Interactions:                                     | -28.916077156632781 | -786.8465  | -18145.11 | -75919.15  |

|                                    |                     |            |           |            |
|------------------------------------|---------------------|------------|-----------|------------|
| Alternative Decomposition Orb.Int. |                     |            |           |            |
| Kinetic:                           | -70.916500767179599 | -1929.7362 | -44500.78 | -186191.25 |
| Coulomb:                           | 38.719694533467361  | 1053.6165  | 24296.98  | 101658.54  |
| XC:                                | 3.280729077079462   | 89.2732    | 2058.69   | 8613.55    |
|                                    | -----               | -----      | -----     | -----      |
| Total Orbital Interactions:        | -28.916077156632774 | -786.8465  | -18145.11 | -75919.15  |
| Residu (E=Steric+OrbInt+Res):      | 0.000001494113899   | 0.0000     | 0.00      | 0.00       |
| Dispersion Energy:                 | -0.045582659733669  | -1.2404    | -28.60    | -119.68    |
| Total Bonding Energy:              | -6.781685012143165  | -184.5390  | -4255.57  | -17805.31  |

Summary of Bonding Energy (energy terms are taken from the energy decomposition above)

|                                 |                    |           |          |           |
|---------------------------------|--------------------|-----------|----------|-----------|
| Electrostatic Energy:           | -5.941127213025312 | -161.6663 | -3728.11 | -15598.43 |
| Kinetic Energy:                 | 6.392316310705539  | 173.9438  | 4011.24  | 16783.02  |
| Coulomb (Steric+OrbInt) Energy: | -1.301773261517319 | -35.4231  | -816.88  | -3417.81  |
| XC Energy:                      | -5.885518188572397 | -160.1531 | -3693.22 | -15452.43 |
| Dispersion Energy:              | -0.045582659733669 | -1.2404   | -28.60   | -119.68   |
|                                 | -----              | -----     | -----    | -----     |
| Total Bonding Energy:           | -6.781685012143157 | -184.5390 | -4255.57 | -17805.31 |

F R A G M E N T E N E R G Y T E R M S \*\*\* (summed over all fragments) \*\*\*

The energy terms below are (parts of) the Total Energy of the fragments from which the molecule is built.

|                          |                      |            |            |            |
|--------------------------|----------------------|------------|------------|------------|
| Exchange and Correlation |                      |            |            |            |
| Exchange LDA:            | -230.014156102854201 | -6259.0036 | -144336.08 | -603902.08 |
| Exchange GGA:            | -19.441426454342412  | -529.0281  | -12199.68  | -51043.46  |
| Correlation LDA:         | -12.269004788645029  | -333.8566  | -7698.92   | -32212.27  |
| Correlation GGA:         | 5.709991558470186    | 155.3768   | 3583.07    | 14991.58   |
|                          | -----                | -----      | -----      | -----      |
| Total XC:                | -256.014595787371491 | -6966.5116 | -160651.60 | -672166.23 |

Intensities

=====

| Frequency<br>cm-1 | Dipole Strength<br>e-40 esu <sup>2</sup> cm <sup>2</sup> | Absorption Intensity (degeneracy not counted)<br>km/mole |
|-------------------|----------------------------------------------------------|----------------------------------------------------------|
| -----             | -----                                                    | -----                                                    |
| 42.168973         | 63.572917                                                | 0.671960                                                 |
| 59.196173         | 0.856007                                                 | 0.012701                                                 |
| 72.308630         | 27.028382                                                | 0.489878                                                 |
| 86.017944         | 25.700493                                                | 0.554126                                                 |
| 87.887693         | 11.364502                                                | 0.250355                                                 |
| 96.411235         | 2.602577                                                 | 0.062894                                                 |
| 115.440576        | 1.191932                                                 | 0.034490                                                 |
| 133.107510        | 110.885041                                               | 3.699590                                                 |
| 186.981542        | 34.350407                                                | 1.609936                                                 |
| 198.089345        | 6.474023                                                 | 0.321450                                                 |
| 225.433314        | 98.030333                                                | 5.539322                                                 |
| 252.136652        | 10.990434                                                | 0.694591                                                 |
| 277.531492        | 76.117281                                                | 5.295093                                                 |
| 302.029625        | 256.861775                                               | 19.445857                                                |
| 369.556110        | 11.186516                                                | 1.036223                                                 |
| 381.279737        | 178.281809                                               | 17.038401                                                |
| 389.888472        | 82.498451                                                | 8.062398                                                 |
| 418.379590        | 53.205194                                                | 5.579594                                                 |
| 443.167508        | 11.764222                                                | 1.306800                                                 |
| 454.616658        | 3.224493                                                 | 0.367439                                                 |
| 466.352575        | 113.932680                                               | 13.318054                                                |
| 468.816189        | 3.736836                                                 | 0.439122                                                 |
| 485.121914        | 121.268102                                               | 14.746045                                                |
| 501.400983        | 10.181946                                                | 1.279658                                                 |
| 529.461500        | 50.929208                                                | 6.758952                                                 |
| 553.098046        | 9.459686                                                 | 1.311466                                                 |
| 584.264834        | 209.336554                                               | 30.657228                                                |
| 596.977854        | 300.078586                                               | 44.902580                                                |
| 624.849495        | 48.644133                                                | 7.618754                                                 |
| 637.277854        | 118.872346                                               | 18.988372                                                |
| 641.705356        | 69.725048                                                | 11.215085                                                |
| 657.467912        | 2.502410                                                 | 0.412393                                                 |
| 710.273868        | 51.629555                                                | 9.191836                                                 |
| 723.663811        | 95.901857                                                | 17.395701                                                |
| 742.143605        | 354.007284                                               | 65.853402                                                |
| 754.103779        | 2.786768                                                 | 0.526757                                                 |
| 784.428322        | 7.592283                                                 | 1.492807                                                 |
| 845.123649        | 0.912663                                                 | 0.193334                                                 |

Electronic Supplementary Information for Dalton Transactions  
This journal is © The Royal Society of Chemistry 2010

|             |             |            |
|-------------|-------------|------------|
| 863.758554  | 0.217791    | 0.047153   |
| 902.917745  | 61.034321   | 13.813393  |
| 922.744251  | 0.298194    | 0.068970   |
| 962.866917  | 0.308098    | 0.074359   |
| 968.924298  | 0.192772    | 0.046818   |
| 986.180047  | 1.282286    | 0.316971   |
| 996.427244  | 20.563728   | 5.136006   |
| 1004.365077 | 84.327886   | 21.229555  |
| 1012.838810 | 14.673773   | 3.725291   |
| 1041.039738 | 2.577661    | 0.672622   |
| 1047.818106 | 70.357531   | 18.478834  |
| 1094.578222 | 3.347527    | 0.918436   |
| 1105.396888 | 8.870536    | 2.457798   |
| 1134.154431 | 14.150876   | 4.022848   |
| 1150.011576 | 18.335518   | 5.285346   |
| 1238.189982 | 13.620080   | 4.227124   |
| 1267.374205 | 69.553958   | 22.095548  |
| 1279.341905 | 8.650398    | 2.773964   |
| 1303.528814 | 41.623460   | 13.599937  |
| 1312.765898 | 31.898856   | 10.496402  |
| 1406.515677 | 65.079114   | 22.943743  |
| 1423.565928 | 19.795683   | 7.063601   |
| 1439.569643 | 6.780996    | 2.446832   |
| 1467.337453 | 218.612561  | 80.405024  |
| 1481.447452 | 65.688234   | 24.392253  |
| 1538.011510 | 33.750505   | 13.011217  |
| 1550.867475 | 60.968709   | 23.700623  |
| 1570.993039 | 96.740180   | 38.094232  |
| 1592.217277 | 135.451307  | 54.058451  |
| 1973.257961 | 1476.762214 | 730.419746 |
| 2034.614798 | 1160.876431 | 592.033474 |
| 3073.174119 | 67.669220   | 52.126241  |
| 3081.336480 | 1.257156    | 0.970971   |
| 3090.753644 | 4.348866    | 3.369136   |
| 3097.463332 | 19.204330   | 14.910198  |
| 3098.416249 | 5.391447    | 4.187195   |
| 3113.319148 | 28.810799   | 22.483142  |
| 3123.741151 | 5.728697    | 4.485481   |
| 3134.796097 | 4.323889    | 3.397519   |
| 3422.022950 | 13.792269   | 11.830326  |

Zero-Point Energy : 0.189559 a.u.  
===== 5.158164 eV

P4'

Geometry CYCLE 13  
 =====

Energy gradients wrt nuclear displacements  
 =====

| Atom | Cartesian (a.u./angstrom) |           |           |
|------|---------------------------|-----------|-----------|
|      | X                         | Y         | Z         |
| 1 O  | -0.000220                 | 0.000294  | 0.000146  |
| 2 O  | 0.000149                  | 0.000364  | 0.000231  |
| 3 C  | 0.000068                  | -0.000305 | -0.000247 |
| 4 C  | -0.000370                 | -0.000625 | -0.000290 |
| 5 Ru | 0.000724                  | -0.000091 | -0.000466 |
| 6 Cl | 0.000094                  | -0.000271 | 0.000467  |
| 7 H  | -0.000114                 | 0.000027  | -0.000065 |
| 8 O  | 0.000036                  | 0.000100  | 0.000177  |
| 9 C  | -0.000151                 | 0.000106  | -0.000266 |
| 10 C | 0.000217                  | -0.000218 | 0.000059  |
| 11 C | -0.000184                 | 0.000028  | 0.000094  |
| 12 C | 0.000273                  | -0.000178 | -0.000168 |
| 13 H | -0.000112                 | -0.000144 | -0.000018 |
| 14 H | 0.000059                  | -0.000138 | 0.000047  |
| 15 H | -0.000204                 | 0.000138  | 0.000087  |
| 16 H | 0.000186                  | 0.000147  | -0.000130 |
| 17 H | -0.000003                 | -0.000039 | -0.000142 |
| 18 H | 0.000008                  | -0.000070 | 0.000013  |
| 19 H | -0.000013                 | 0.000099  | 0.000047  |
| 20 H | -0.000050                 | 0.000195  | 0.000034  |
| 21 O | -0.000606                 | 0.000903  | 0.000398  |
| 22 C | 0.000238                  | -0.000294 | 0.000055  |
| 23 C | -0.000007                 | 0.000072  | 0.000037  |
| 24 C | -0.000082                 | 0.000225  | 0.000045  |
| 25 C | -0.000032                 | -0.000470 | 0.000017  |
| 26 H | -0.000036                 | -0.000002 | -0.000068 |
| 27 H | 0.000008                  | 0.000061  | -0.000093 |
| 28 H | 0.000035                  | -0.000041 | 0.000027  |
| 29 H | -0.000021                 | -0.000019 | -0.000010 |
| 30 H | 0.000017                  | -0.000011 | -0.000007 |
| 31 H | -0.000004                 | -0.000011 | -0.000003 |
| 32 H | 0.000077                  | 0.000085  | 0.000038  |
| 33 H | 0.000019                  | 0.000084  | -0.000047 |

-----  
 Geometry Convergence after Step 13  
 -----

|                          |            |                     |   |  |
|--------------------------|------------|---------------------|---|--|
| current energy           |            | -6.92762453 Hartree |   |  |
| abs of energy change     | 0.00004520 | 0.00100000          | T |  |
| constrained gradient max | 0.00090250 | 0.00100000          | T |  |
| constrained gradient rms | 0.00021854 | 0.00066667          | T |  |
| gradient max             | 0.00090250 |                     |   |  |
| gradient rms             | 0.00021854 |                     |   |  |
| cart. step max           | 0.00076932 | 0.01000000          | T |  |
| cart. step rms           | 0.00026190 | 0.00666667          | T |  |

|                                                                 | hartree                   | eV              | kcal/mol        | kJ/mol          |
|-----------------------------------------------------------------|---------------------------|-----------------|-----------------|-----------------|
| <b>Pauli Repulsion</b>                                          |                           |                 |                 |                 |
| Kinetic (Delta T^0):                                            | 69.105141226505950        | 1880.4466       | 43364.14        | 181435.52       |
| Delta V^Pauli Coulomb:                                          | -36.533698176443934       | -994.1325       | -22925.24       | -95919.21       |
| Delta V^Pauli LDA-XC:                                           | -8.927189191553119        | -242.9212       | -5601.90        | -23438.33       |
| Delta V^Pauli GGA-Exchange:                                     | 0.573183207966451         | 15.5971         | 359.68          | 1504.89         |
| Delta V^Pauli GGA-Correlation:                                  | -0.179905945657610        | -4.8955         | -112.89         | -472.34         |
| <b>Total Pauli Repulsion:</b>                                   | <b>24.037531120817739</b> | <b>654.0945</b> | <b>15083.78</b> | <b>63110.53</b> |
| (Total Pauli Repulsion =<br>Delta E^Pauli in BB paper)          |                           |                 |                 |                 |
| <b>Steric Interaction</b>                                       |                           |                 |                 |                 |
| Pauli Repulsion (Delta E^Pauli):                                | 24.037531120817739        | 654.0945        | 15083.78        | 63110.53        |
| Electrostatic Interaction:                                      | -5.220126218703804        | -142.0469       | -3275.68        | -13705.44       |
| (Electrostatic Interaction =<br>Delta V_elstat in the BB paper) |                           |                 |                 |                 |
| <b>Total Steric Interaction:</b>                                | <b>18.817404902113935</b> | <b>512.0476</b> | <b>11808.10</b> | <b>49405.09</b> |
| (Total Steric Interaction =<br>Delta E^0 in the BB paper)       |                           |                 |                 |                 |

|                                    |                     |            |           |            |
|------------------------------------|---------------------|------------|-----------|------------|
| Orbital Interactions               |                     |            |           |            |
| A:                                 | -25.683451229912883 | -698.8823  | -16116.61 | -67431.89  |
|                                    | -----               | -----      | -----     | -----      |
| Total Orbital Interactions:        | -25.685547302793097 | -698.9393  | -16117.93 | -67437.39  |
| Alternative Decomposition Orb.Int. |                     |            |           |            |
| Kinetic:                           | -62.611108314773418 | -1703.7349 | -39289.07 | -164385.44 |
| Coulomb:                           | 34.402370183007648  | 936.1361   | 21587.82  | 90323.41   |
| XC:                                | 2.523190828972694   | 68.6595    | 1583.33   | 6624.64    |
|                                    | -----               | -----      | -----     | -----      |
| Total Orbital Interactions:        | -25.685547302793076 | -698.9393  | -16117.93 | -67437.39  |
| Residu (E=Steric+OrbInt+Res):      | 0.000012914023420   | 0.0004     | 0.01      | 0.03       |
| Dispersion Energy:                 | -0.059495586089654  | -1.6190    | -37.33    | -156.21    |
| Total Bonding Energy:              | -6.927625072745395  | -188.5103  | -4347.15  | -18188.48  |

Summary of Bonding Energy (energy terms are taken from the energy decomposition above)

|                                 |                    |           |          |           |
|---------------------------------|--------------------|-----------|----------|-----------|
| =====                           |                    |           |          |           |
| Electrostatic Energy:           | -5.220126218703804 | -142.0469 | -3275.68 | -13705.44 |
| Kinetic Energy:                 | 6.494032911732532  | 176.7116  | 4075.07  | 17050.08  |
| Coulomb (Steric+OrbInt) Energy: | -2.131315079412865 | -57.9960  | -1337.42 | -5595.77  |
| XC Energy:                      | -6.010721100271582 | -163.5600 | -3771.78 | -15781.15 |
| Dispersion Energy:              | -0.059495586089654 | -1.6190   | -37.33   | -156.21   |
|                                 | -----              | -----     | -----    | -----     |
| Total Bonding Energy:           | -6.927625072745372 | -188.5103 | -4347.15 | -18188.48 |

F R A G M E N T E N E R G Y T E R M S \*\*\* (summed over all fragments) \*\*\*

The energy terms below are (parts of) the Total Energy of the fragments from which the molecule is built.

|                          |                      |            |            |            |
|--------------------------|----------------------|------------|------------|------------|
| Exchange and Correlation |                      |            |            |            |
| Exchange LDA:            | -227.052843694443141 | -6178.4222 | -142477.83 | -596127.16 |
| Exchange GGA:            | -18.980894164853268  | -516.4964  | -11910.69  | -49834.33  |
| Correlation LDA:         | -12.067970077101474  | -328.3862  | -7572.77   | -31684.45  |
| Correlation GGA:         | 5.593973978124235    | 152.2198   | 3510.27    | 14686.98   |
|                          | -----                | -----      | -----      | -----      |
| Total XC:                | -252.507733958273633 | -6871.0850 | -158451.01 | -662958.96 |

Intensities

=====

| Frequency<br>cm-1 | Dipole Strength<br>e-40 esu <sup>2</sup> cm <sup>2</sup> | Absorption Intensity (degeneracy not counted)<br>km/mole |
|-------------------|----------------------------------------------------------|----------------------------------------------------------|
| -----             | -----                                                    | -----                                                    |
| 41.380481         | 27.174320                                                | 0.281859                                                 |
| 51.105256         | 7.326131                                                 | 0.093847                                                 |
| 55.089333         | 33.600296                                                | 0.463969                                                 |
| 60.522949         | 51.296136                                                | 0.778185                                                 |
| 67.553995         | 25.969727                                                | 0.439741                                                 |
| 75.084610         | 42.104203                                                | 0.792418                                                 |
| 78.283806         | 11.465583                                                | 0.224981                                                 |
| 94.932529         | 69.933856                                                | 1.664105                                                 |
| 104.685204        | 10.660553                                                | 0.279733                                                 |
| 114.297630        | 26.571861                                                | 0.761267                                                 |
| 133.779650        | 62.175039                                                | 2.084895                                                 |
| 167.618711        | 7.256253                                                 | 0.304869                                                 |
| 173.436319        | 15.019929                                                | 0.652959                                                 |
| 186.739883        | 12.303233                                                | 0.575883                                                 |
| 197.184293        | 5.547069                                                 | 0.274166                                                 |
| 205.205849        | 47.697569                                                | 2.453376                                                 |
| 217.492655        | 21.274020                                                | 1.159771                                                 |
| 314.081147        | 21.421250                                                | 1.686416                                                 |
| 326.651620        | 432.700333                                               | 35.428284                                                |
| 349.756046        | 248.077507                                               | 21.748569                                                |
| 378.173215        | 44.661605                                                | 4.233535                                                 |
| 418.620191        | 73.846651                                                | 7.748704                                                 |
| 447.737854        | 45.160211                                                | 5.068248                                                 |
| 538.443499        | 69.673316                                                | 9.403395                                                 |
| 557.965400        | 36.396623                                                | 5.090336                                                 |
| 576.405694        | 26.284285                                                | 3.797541                                                 |
| 577.462071        | 110.496186                                               | 15.993695                                                |
| 612.699827        | 11.024724                                                | 1.693143                                                 |
| 649.576617        | 59.021054                                                | 9.609824                                                 |
| 691.337060        | 58.954936                                                | 10.216169                                                |
| 774.645339        | 9.895873                                                 | 1.921477                                                 |
| 780.772360        | 52.516325                                                | 10.277721                                                |

|             |             |            |
|-------------|-------------|------------|
| 815.978377  | 40.057003   | 8.192853   |
| 824.422796  | 89.991111   | 18.596348  |
| 836.047108  | 62.981292   | 13.198373  |
| 857.280377  | 400.878696  | 86.141798  |
| 866.413801  | 286.210075  | 62.156757  |
| 869.241483  | 49.628183   | 10.813017  |
| 874.342270  | 66.733149   | 14.625178  |
| 882.461547  | 35.085231   | 7.760652   |
| 904.566572  | 2.629823    | 0.596273   |
| 911.444782  | 2.802888    | 0.640345   |
| 932.360391  | 42.809872   | 10.004740  |
| 933.714439  | 26.638334   | 6.234465   |
| 994.346525  | 74.201080   | 18.493796  |
| 1003.631166 | 142.766753  | 35.915283  |
| 1005.936316 | 37.918454   | 9.560909   |
| 1013.900828 | 37.939496   | 9.641955   |
| 1104.643196 | 0.539001    | 0.149242   |
| 1107.212913 | 6.154537    | 1.708066   |
| 1158.847111 | 9.116630    | 2.648125   |
| 1169.711732 | 11.840484   | 3.471573   |
| 1173.938236 | 12.384093   | 3.644077   |
| 1178.418812 | 3.043245    | 0.898907   |
| 1194.605133 | 11.104182   | 3.324980   |
| 1214.368808 | 16.468737   | 5.012899   |
| 1224.266517 | 21.538833   | 6.609616   |
| 1230.709085 | 10.896448   | 3.361386   |
| 1263.998569 | 11.302860   | 3.581071   |
| 1268.769653 | 2.201547    | 0.700146   |
| 1273.827782 | 2.432592    | 0.776709   |
| 1276.710675 | 6.532823    | 2.090602   |
| 1310.840992 | 0.504936    | 0.165907   |
| 1315.051074 | 17.350603   | 5.719200   |
| 1335.816554 | 31.067510   | 10.402347  |
| 1339.933016 | 10.836476   | 3.639563   |
| 1429.302859 | 10.347532   | 3.707141   |
| 1433.182020 | 5.022365    | 1.804212   |
| 1442.865217 | 16.142637   | 5.838191   |
| 1449.188041 | 12.587751   | 4.572471   |
| 1451.354424 | 3.220880    | 1.171726   |
| 1456.915866 | 1.733737    | 0.633134   |
| 1466.289349 | 4.745212    | 1.744028   |
| 1469.966308 | 7.546023    | 2.780376   |
| 1861.781743 | 118.357622  | 55.233564  |
| 1951.749036 | 1765.345170 | 863.637869 |
| 1998.482570 | 1241.640965 | 621.977204 |
| 2943.162262 | 23.091092   | 17.034789  |
| 2950.361682 | 16.797840   | 12.422436  |
| 2958.228327 | 15.335239   | 11.371043  |
| 2962.801898 | 17.004791   | 12.628506  |
| 2963.367327 | 6.704192    | 4.979778   |
| 2966.938179 | 36.737310   | 27.320832  |
| 2974.056486 | 40.278300   | 30.026065  |
| 2974.618773 | 56.435760   | 42.078840  |
| 3009.802820 | 5.203593    | 3.925721   |
| 3014.323062 | 8.946096    | 6.759295   |
| 3024.153321 | 6.919457    | 5.245101   |
| 3027.652842 | 10.094092   | 7.660400   |
| 3034.246841 | 13.889445   | 10.563647  |
| 3042.235003 | 19.242574   | 14.673510  |
| 3045.557012 | 16.786788   | 12.814817  |
| 3057.207132 | 7.462927    | 5.718895   |

Zero-Point Energy : 0.255260 a.u.  
===== 6.945983 eV

TS1

Geometry CYCLE 67

=====

Energy gradients wrt nuclear displacements

=====

| Atom  | Cartesian (a.u./angstrom) |           |           |
|-------|---------------------------|-----------|-----------|
|       | X                         | Y         | Z         |
| 1 O   | -0.000165                 | -0.000641 | 0.000122  |
| 2 O   | -0.000133                 | 0.000104  | -0.000018 |
| 3 C   | 0.000283                  | 0.000952  | -0.000120 |
| 4 C   | -0.000116                 | -0.000139 | 0.000125  |
| 5 H   | 0.000014                  | 0.000014  | 0.000007  |
| 6 Ru  | 0.000603                  | -0.000289 | -0.000107 |
| 7 C   | 0.000001                  | 0.000039  | -0.000002 |
| 8 H   | -0.000017                 | 0.000018  | 0.000008  |
| 9 N   | 0.000020                  | -0.000060 | 0.000055  |
| 10 H  | 0.000000                  | 0.000009  | 0.000010  |
| 11 C  | 0.000000                  | -0.000015 | 0.000002  |
| 12 C  | -0.000042                 | -0.000056 | 0.000087  |
| 13 C  | 0.000016                  | 0.000025  | -0.000017 |
| 14 C  | 0.000014                  | 0.000010  | 0.000002  |
| 15 C  | 0.000024                  | 0.000001  | -0.000020 |
| 16 C  | 0.000003                  | 0.000018  | 0.000000  |
| 17 C  | -0.000017                 | -0.000025 | -0.000008 |
| 18 C  | -0.000001                 | 0.000013  | -0.000003 |
| 19 H  | 0.000026                  | 0.000004  | 0.000013  |
| 20 H  | -0.000044                 | 0.000024  | 0.000041  |
| 21 C  | -0.000009                 | -0.000015 | -0.000009 |
| 22 H  | -0.000024                 | -0.000020 | -0.000024 |
| 23 C  | -0.000007                 | -0.000007 | 0.000027  |
| 24 H  | 0.000002                  | -0.000004 | -0.000021 |
| 25 H  | 0.000018                  | 0.000033  | -0.000012 |
| 26 Cl | 0.000030                  | -0.000042 | -0.000052 |
| 27 N  | 0.000041                  | 0.000058  | -0.000067 |
| 28 H  | 0.000039                  | -0.000020 | 0.000010  |
| 29 H  | -0.000043                 | -0.000027 | 0.000033  |
| 30 H  | -0.000049                 | -0.000126 | -0.000132 |
| 31 B  | 0.000147                  | 0.000003  | 0.000159  |
| 32 H  | -0.000038                 | 0.000039  | -0.000035 |
| 33 H  | -0.000617                 | 0.000162  | -0.000026 |
| 34 H  | 0.000041                  | -0.000039 | -0.000028 |

-----  
 Geometry Convergence after Step 67

|                          |                     |            |   |
|--------------------------|---------------------|------------|---|
| current energy           | -7.86149493 Hartree |            |   |
| abs of energy change     | 0.00001003          | 0.00100000 | T |
| constrained gradient max | 0.00095207          | 0.00100000 | T |
| constrained gradient rms | 0.00015794          | 0.00066667 | T |
| gradient max             | 0.00095207          |            |   |
| gradient rms             | 0.00015794          |            |   |
| cart. step max           | 0.00489459          | 0.01000000 | T |
| cart. step rms           | 0.00104854          | 0.00666667 | T |

|                                                                 | hartree                   | eV              | kcal/mol        | kJ/mol          |
|-----------------------------------------------------------------|---------------------------|-----------------|-----------------|-----------------|
| <b>Pauli Repulsion</b>                                          |                           |                 |                 |                 |
| Kinetic (Delta T^0):                                            | 86.480135185964542        | 2353.2442       | 54267.11        | 227053.56       |
| Delta V^Pauli Coulomb:                                          | -44.268067071747851       | -1204.5954      | -27778.63       | -116225.79      |
| Delta V^Pauli LDA-XC:                                           | -10.882419465514218       | -296.1257       | -6828.82        | -28571.79       |
| Delta V^Pauli GGA-Exchange:                                     | 0.613837575539364         | 16.7034         | 385.19          | 1611.63         |
| Delta V^Pauli GGA-Correlation:                                  | -0.169884102451499        | -4.6228         | -106.60         | -446.03         |
| <b>Total Pauli Repulsion:</b>                                   | <b>31.773602121790340</b> | <b>864.6037</b> | <b>19938.24</b> | <b>83421.58</b> |
| (Total Pauli Repulsion =<br>Delta E^Pauli in BB paper)          |                           |                 |                 |                 |
| <b>Steric Interaction</b>                                       |                           |                 |                 |                 |
| Pauli Repulsion (Delta E^Pauli):                                | 31.773602121790340        | 864.6037        | 19938.24        | 83421.58        |
| Electrostatic Interaction:                                      | -6.629447029374708        | -180.3964       | -4160.04        | -17405.61       |
| (Electrostatic Interaction =<br>Delta V_elstat in the BB paper) |                           |                 |                 |                 |
| <b>Total Steric Interaction:</b>                                | <b>25.144155092415630</b> | <b>684.2073</b> | <b>15778.20</b> | <b>66015.97</b> |
| (Total Steric Interaction =<br>Delta E^0 in the BB paper)       |                           |                 |                 |                 |

Electronic Supplementary Information for Dalton Transactions  
This journal is © The Royal Society of Chemistry 2010

|                                    |                     |            |           |            |
|------------------------------------|---------------------|------------|-----------|------------|
| Orbital Interactions               |                     |            |           |            |
| A:                                 | -32.937263392173044 | -896.2685  | -20668.45 | -86476.77  |
|                                    | -----               | -----      | -----     | -----      |
| Total Orbital Interactions:        | -32.940709694921388 | -896.3623  | -20670.61 | -86485.82  |
| Alternative Decomposition Orb.Int. |                     |            |           |            |
| Kinetic:                           | -79.104783669362916 | -2152.5507 | -49639.01 | -207689.58 |
| Coulomb:                           | 42.589060818647482  | 1158.9073  | 26725.04  | 111817.56  |
| XC:                                | 3.575013155794016   | 97.2811    | 2243.35   | 9386.20    |
|                                    | -----               | -----      | -----     | -----      |
| Total Orbital Interactions:        | -32.940709694921416 | -896.3623  | -20670.61 | -86485.82  |
| Residu (E=Steric+OrbInt+Res):      | -0.000003673924012  | -0.0001    | 0.00      | -0.01      |
| Dispersion Energy:                 | -0.064936674546025  | -1.7670    | -40.75    | -170.49    |
| Total Bonding Energy:              | -7.861494950975795  | -213.9222  | -4933.16  | -20640.35  |

Summary of Bonding Energy (energy terms are taken from the energy decomposition above)

|                                 |                    |           |          |           |
|---------------------------------|--------------------|-----------|----------|-----------|
| =====                           |                    |           |          |           |
| Electrostatic Energy:           | -6.629447029374708 | -180.3964 | -4160.04 | -17405.61 |
| Kinetic Energy:                 | 7.375351516601626  | 200.6935  | 4628.10  | 19363.98  |
| Coulomb (Steric+OrbInt) Energy: | -1.679009927024381 | -45.6882  | -1053.59 | -4408.24  |
| XC Energy:                      | -6.863452836632336 | -186.7641 | -4306.88 | -18019.99 |
| Dispersion Energy:              | -0.064936674546025 | -1.7670   | -40.75   | -170.49   |
|                                 | -----              | -----     | -----    | -----     |
| Total Bonding Energy:           | -7.861494950975825 | -213.9222 | -4933.16 | -20640.35 |

FRAGMENT ENERGY TERMS \*\*\* (summed over all fragments) \*\*\*

The energy terms below are (parts of) the Total Energy of the fragments from which the molecule is built.

|                          |                      |            |            |            |
|--------------------------|----------------------|------------|------------|------------|
| Exchange and Correlation |                      |            |            |            |
| Exchange LDA:            | -239.772731226645277 | -6524.5480 | -150459.68 | -629523.22 |
| Exchange GGA:            | -20.772127557038345  | -565.2384  | -13034.71  | -54537.21  |
| Correlation LDA:         | -13.181963892561200  | -358.6995  | -8271.81   | -34609.24  |
| Correlation GGA:         | 6.202767335458613    | 168.7859   | 3892.30    | 16285.36   |
|                          | -----                | -----      | -----      | -----      |
| Total XC:                | -267.524055340786219 | -7279.6999 | -167873.90 | -702384.31 |

Intensities

=====

| Frequency<br>cm-1 | Dipole Strength<br>1e-40 esu2 cm2 | Absorption Intensity (degeneracy not counted)<br>km/mole |
|-------------------|-----------------------------------|----------------------------------------------------------|
| -----             | -----                             | -----                                                    |
| -507.567834       | 2147.711526                       | -273.242412                                              |
| 45.341829         | 58.016041                         | 0.659364                                                 |
| 53.127693         | 28.145050                         | 0.374801                                                 |
| 63.168362         | 57.292552                         | 0.907143                                                 |
| 70.509379         | 2.424353                          | 0.042847                                                 |
| 85.411096         | 5.357298                          | 0.114693                                                 |
| 87.272952         | 35.617237                         | 0.779144                                                 |
| 95.556487         | 3.118006                          | 0.074682                                                 |
| 104.104666        | 83.409105                         | 2.176515                                                 |
| 120.577873        | 21.163198                         | 0.639627                                                 |
| 133.966746        | 9.022975                          | 0.302988                                                 |
| 143.553582        | 182.023673                        | 6.549678                                                 |
| 155.473314        | 87.855957                         | 3.423774                                                 |
| 193.947214        | 62.461036                         | 3.036483                                                 |
| 206.338133        | 10.715551                         | 0.554207                                                 |
| 231.929060        | 56.942212                         | 3.310302                                                 |
| 261.643697        | 43.250111                         | 2.836453                                                 |
| 309.356630        | 248.182124                        | 19.244560                                                |
| 316.798622        | 223.345553                        | 17.735305                                                |
| 334.722532        | 66.337531                         | 5.565732                                                 |
| 361.684633        | 18.110689                         | 1.641886                                                 |
| 389.544270        | 28.316695                         | 2.764887                                                 |
| 408.325414        | 10.351200                         | 1.059437                                                 |
| 421.699574        | 2.525424                          | 0.266941                                                 |
| 448.704961        | 25.482806                         | 2.866066                                                 |
| 457.967217        | 4.544197                          | 0.521638                                                 |
| 462.261388        | 123.353864                        | 14.292837                                                |
| 491.303254        | 21.241373                         | 2.615835                                                 |
| 503.917032        | 74.714190                         | 9.437136                                                 |
| 525.945645        | 68.281010                         | 9.001583                                                 |
| 545.160724        | 2.302142                          | 0.314583                                                 |
| 567.072018        | 96.919831                         | 13.776184                                                |
| 576.754034        | 234.319746                        | 33.874867                                                |
| 606.279472        | 266.564345                        | 40.509137                                                |



Electronic Supplementary Information for Dalton Transactions  
This journal is © The Royal Society of Chemistry 2010

|             |             |            |
|-------------|-------------|------------|
| 619.799425  | 10.151031   | 1.577028   |
| 625.244546  | 71.140712   | 11.149264  |
| 648.455633  | 8.114951    | 1.318998   |
| 699.508496  | 141.604406  | 24.828348  |
| 722.637765  | 37.697888   | 6.828350   |
| 727.472442  | 179.915250  | 32.806703  |
| 739.718022  | 4.409270    | 0.817544   |
| 742.622413  | 263.900735  | 49.123208  |
| 763.965401  | 43.372626   | 8.305532   |
| 782.089015  | 8.625120    | 1.690828   |
| 855.576225  | 12.168601   | 2.609621   |
| 867.861506  | 2.604999    | 0.566678   |
| 893.602363  | 478.461241  | 107.168991 |
| 924.626834  | 323.267653  | 74.921560  |
| 934.394666  | 14.185685   | 3.322452   |
| 953.428734  | 22.983738   | 5.492714   |
| 970.089005  | 47.718619   | 11.603193  |
| 971.634471  | 805.467122  | 196.168288 |
| 976.639882  | 10.758965   | 2.633801   |
| 995.154640  | 20.749845   | 5.175872   |
| 1011.490666 | 5.974765    | 1.514819   |
| 1018.606401 | 231.084622  | 59.000476  |
| 1033.146352 | 45.010762   | 11.656181  |
| 1045.954958 | 61.734694   | 16.185285  |
| 1082.713735 | 26.879794   | 7.294872   |
| 1089.442492 | 10.420190   | 2.845496   |
| 1097.512521 | 19.702821   | 5.420208   |
| 1134.074862 | 7.649031    | 2.174334   |
| 1138.401820 | 6.807571    | 1.942521   |
| 1146.753273 | 564.662887  | 162.307020 |
| 1189.714437 | 169.549312  | 50.561137  |
| 1192.311170 | 47.452779   | 14.181734  |
| 1257.196791 | 12.522988   | 3.946293   |
| 1276.456024 | 1.510511    | 0.483290   |
| 1293.291802 | 31.419367   | 10.185258  |
| 1302.314652 | 15.336018   | 5.006182   |
| 1345.069005 | 28.232781   | 9.518671   |
| 1406.920132 | 41.491305   | 14.632031  |
| 1432.367070 | 26.286949   | 9.437839   |
| 1446.947801 | 91.506900   | 33.188282  |
| 1469.055452 | 24.907395   | 9.171589   |
| 1539.165988 | 3.673707    | 1.417320   |
| 1552.188968 | 14.994756   | 5.833942   |
| 1557.023826 | 62.762377   | 24.494733  |
| 1570.508956 | 11.020238   | 4.338199   |
| 1589.833646 | 36.923312   | 14.713988  |
| 1724.205298 | 1303.240945 | 563.237759 |
| 1897.435522 | 713.261774  | 339.229839 |
| 1974.967111 | 1950.069542 | 965.357193 |
| 2026.519900 | 1812.378527 | 920.614585 |
| 2450.343498 | 112.413543  | 69.043640  |
| 2490.905675 | 225.235327  | 140.628020 |
| 3087.742894 | 1.076913    | 0.833489   |
| 3093.319649 | 2.777141    | 2.153282   |
| 3097.969557 | 9.153798    | 7.108149   |
| 3103.557471 | 5.143802    | 4.001494   |
| 3107.305852 | 20.852199   | 16.241044  |
| 3114.489973 | 20.717936   | 16.173779  |
| 3121.034774 | 2.422496    | 1.895134   |
| 3126.910930 | 9.882203    | 7.745463   |
| 3439.684005 | 14.516719   | 12.515987  |
| 3531.989637 | 8.939988    | 7.914700   |

Zero-Point Energy : 0.236476 a.u.  
===== 6.434828 eV  
(imaginary frequencies were excluded from the summation)

TS2

Geometry CYCLE 39

=====

Energy gradients wrt nuclear displacements

=====

| Atom  | Cartesian (a.u./angstrom) |           |           |
|-------|---------------------------|-----------|-----------|
|       | X                         | Y         | Z         |
| 1 O   | -0.000163                 | 0.000203  | 0.000163  |
| 2 O   | -0.000064                 | 0.000060  | 0.000073  |
| 3 C   | 0.000103                  | -0.000093 | 0.000050  |
| 4 C   | 0.000215                  | -0.000178 | -0.000238 |
| 5 H   | 0.000020                  | 0.000047  | 0.000007  |
| 6 Ru  | -0.000063                 | 0.000024  | -0.000514 |
| 7 C   | 0.000258                  | 0.000009  | 0.000016  |
| 8 H   | -0.000135                 | -0.000023 | -0.000060 |
| 9 N   | -0.000160                 | 0.000146  | 0.000060  |
| 10 H  | 0.000013                  | 0.000009  | 0.000002  |
| 11 C  | -0.000077                 | 0.000003  | -0.000128 |
| 12 C  | 0.000307                  | 0.000096  | 0.000209  |
| 13 C  | -0.000176                 | -0.000059 | -0.000136 |
| 14 C  | -0.000156                 | -0.000098 | -0.000108 |
| 15 C  | 0.000166                  | 0.000066  | 0.000070  |
| 16 C  | 0.000192                  | 0.000059  | 0.000083  |
| 17 C  | -0.000092                 | 0.000058  | -0.000078 |
| 18 C  | 0.000073                  | 0.000026  | 0.000047  |
| 19 H  | 0.000031                  | 0.000003  | 0.000001  |
| 20 H  | 0.000052                  | 0.000046  | 0.000022  |
| 21 C  | 0.000103                  | -0.000082 | 0.000121  |
| 22 H  | 0.000019                  | 0.000054  | -0.000090 |
| 23 C  | -0.000059                 | -0.000060 | -0.000070 |
| 24 H  | 0.000137                  | -0.000078 | 0.000076  |
| 25 H  | -0.000090                 | -0.000061 | -0.000062 |
| 26 Cl | -0.000136                 | 0.000056  | 0.000212  |
| 27 H  | -0.000409                 | -0.000278 | 0.000393  |
| 28 H  | 0.000088                  | 0.000047  | -0.000121 |

-----  
 Geometry Convergence after Step 39

|                                                                 |                     |            |           |            |
|-----------------------------------------------------------------|---------------------|------------|-----------|------------|
| current energy                                                  | -6.76269434 Hartree |            |           |            |
| abs of energy change                                            | 0.00000024          | 0.00100000 | T         |            |
| constrained gradient max                                        | 0.00051408          | 0.00100000 | T         |            |
| constrained gradient rms                                        | 0.00014021          | 0.00066667 | T         |            |
| gradient max                                                    | 0.00051408          |            |           |            |
| gradient rms                                                    | 0.00014021          |            |           |            |
| cart. step max                                                  | 0.00926447          | 0.01000000 | T         |            |
| cart. step rms                                                  | 0.00232943          | 0.00666667 | T         |            |
|                                                                 | hartree             | eV         | kcal/mol  | kJ/mol     |
| -----                                                           |                     |            |           |            |
| Pauli Repulsion                                                 |                     |            |           |            |
| Kinetic (Delta T^0):                                            | 77.406486745885104  | 2106.3377  | 48573.31  | 203230.70  |
| Delta V^Pauli Coulomb:                                          | -40.064954273333186 | -1090.2229 | -25141.14 | -105190.52 |
| Delta V^Pauli LDA-XC:                                           | -9.583754501284497  | -260.7872  | -6013.90  | -25162.14  |
| Delta V^Pauli GGA-Exchange:                                     | 0.546776093103102   | 14.8785    | 343.11    | 1435.56    |
| Delta V^Pauli GGA-Correlation:                                  | -0.152419555163154  | -4.1475    | -95.64    | -400.18    |
| -----                                                           |                     |            |           |            |
| Total Pauli Repulsion:                                          | 28.152134509207372  | 766.0586   | 17665.73  | 73913.42   |
| (Total Pauli Repulsion =<br>Delta E^Pauli in BB paper)          |                     |            |           |            |
| Steric Interaction                                              |                     |            |           |            |
| Pauli Repulsion (Delta E^Pauli):                                | 28.152134509207372  | 766.0586   | 17665.73  | 73913.42   |
| Electrostatic Interaction:                                      | -6.007824225597014  | -163.4812  | -3769.97  | -15773.54  |
| (Electrostatic Interaction =<br>Delta V_elstat in the BB paper) |                     |            |           |            |
| -----                                                           |                     |            |           |            |
| Total Steric Interaction:                                       | 22.144310283610359  | 602.5773   | 13895.77  | 58139.88   |
| (Total Steric Interaction =<br>Delta E^0 in the BB paper)       |                     |            |           |            |
| Orbital Interactions                                            |                     |            |           |            |
| A:                                                              | -28.856877597819103 | -785.2356  | -18107.97 | -75763.72  |
| -----                                                           |                     |            |           |            |
| Total Orbital Interactions:                                     | -28.860769507144280 | -785.3415  | -18110.41 | -75773.94  |

Electronic Supplementary Information for Dalton Transactions  
This journal is © The Royal Society of Chemistry 2010

|                                    |                     |            |           |            |
|------------------------------------|---------------------|------------|-----------|------------|
| Alternative Decomposition Orb.Int. |                     |            |           |            |
| Kinetic:                           | -71.059032353025955 | -1933.6147 | -44590.22 | -186565.46 |
| Coulomb:                           | 38.871182768785459  | 1057.7387  | 24392.04  | 102056.28  |
| XC:                                | 3.327080077096205   | 90.5345    | 2087.77   | 8735.25    |
| -----                              |                     |            |           |            |
| Total Orbital Interactions:        | -28.860769507144290 | -785.3415  | -18110.41 | -75773.94  |
|                                    |                     |            |           |            |
| Residu (E=Steric+OrbInt+Res):      | 0.000001166946479   | 0.0000     | 0.00      | 0.00       |
| Dispersion Energy:                 | -0.046236298872018  | -1.2582    | -29.01    | -121.39    |
|                                    |                     |            |           |            |
| Total Bonding Energy:              | -6.762694355459459  | -184.0223  | -4243.66  | -17755.45  |

Summary of Bonding Energy (energy terms are taken from the energy decomposition above)

|                                 |                    |           |          |           |
|---------------------------------|--------------------|-----------|----------|-----------|
| =====                           |                    |           |          |           |
| Electrostatic Energy:           | -6.007824225597014 | -163.4812 | -3769.97 | -15773.54 |
| Kinetic Energy:                 | 6.347454392859149  | 172.7230  | 3983.09  | 16665.24  |
| Coulomb (Steric+OrbInt) Energy: | -1.193770337601244 | -32.4841  | -749.10  | -3134.24  |
| XC Energy:                      | -5.862317886248344 | -159.5218 | -3678.66 | -15391.51 |
| Dispersion Energy:              | -0.046236298872018 | -1.2582   | -29.01   | -121.39   |
| -----                           |                    |           |          |           |
| Total Bonding Energy:           | -6.762694355459471 | -184.0223 | -4243.66 | -17755.45 |

FRAGMENT ENERGY TERMS \*\*\* (summed over all fragments) \*\*\*

The energy terms below are (parts of) the Total Energy of the fragments from which the molecule is built.

|                          |                      |            |            |            |
|--------------------------|----------------------|------------|------------|------------|
| Exchange and Correlation |                      |            |            |            |
| Exchange LDA:            | -230.014143782017499 | -6259.0033 | -144336.07 | -603902.05 |
| Exchange GGA:            | -19.441417986470121  | -529.0279  | -12199.68  | -51043.44  |
| Correlation LDA:         | -12.269002586999616  | -333.8565  | -7698.92   | -32212.26  |
| Correlation GGA:         | 5.709976244428359    | 155.3764   | 3583.06    | 14991.54   |
| -----                    |                      |            |            |            |
| Total XC:                | -256.014588111058913 | -6966.5114 | -160651.60 | -672166.21 |

Intensities  
=====

| Frequency<br>cm-1 | Dipole Strength<br>1e-40 esu2 cm2 | Absorption Intensity (degeneracy not counted)<br>km/mole |
|-------------------|-----------------------------------|----------------------------------------------------------|
| -----             | -----                             | -----                                                    |
| -970.761434       | 1093.569390                       | -266.095133                                              |
| 43.405518         | 71.697474                         | 0.780058                                                 |
| 57.869568         | 13.069982                         | 0.189585                                                 |
| 68.374098         | 31.074593                         | 0.532568                                                 |
| 79.924942         | 14.353828                         | 0.287560                                                 |
| 86.810363         | 39.528653                         | 0.860125                                                 |
| 93.100576         | 53.057123                         | 1.238152                                                 |
| 111.093113        | 15.347161                         | 0.427359                                                 |
| 136.757485        | 95.090031                         | 3.259599                                                 |
| 174.978713        | 7.460737                          | 0.327224                                                 |
| 194.873129        | 12.658838                         | 0.618335                                                 |
| 224.271166        | 63.091898                         | 3.546705                                                 |
| 244.698268        | 56.853545                         | 3.487117                                                 |
| 278.815850        | 11.538764                         | 0.806408                                                 |
| 313.619406        | 291.181117                        | 22.889916                                                |
| 360.093516        | 105.237302                        | 9.498676                                                 |
| 383.168597        | 391.654737                        | 37.615892                                                |
| 388.545367        | 17.079803                         | 1.663423                                                 |
| 412.702427        | 13.520488                         | 1.398645                                                 |
| 442.957926        | 7.253320                          | 0.805337                                                 |
| 457.032560        | 9.345398                          | 1.070590                                                 |
| 467.077448        | 4.497835                          | 0.526587                                                 |
| 484.022083        | 13.146520                         | 1.594976                                                 |
| 512.717055        | 68.313316                         | 8.779326                                                 |
| 551.766857        | 5.732625                          | 0.792843                                                 |
| 564.607161        | 14.199278                         | 2.009513                                                 |
| 593.008771        | 166.921010                        | 24.811338                                                |
| 622.587697        | 17.755962                         | 2.770913                                                 |
| 637.233874        | 152.508876                        | 24.359706                                                |
| 649.543710        | 64.315136                         | 10.471277                                                |
| 688.289783        | 629.546285                        | 108.611812                                               |
| 710.038413        | 37.222075                         | 6.624613                                                 |
| 725.017576        | 93.687750                         | 17.025874                                                |
| 743.033048        | 424.728610                        | 79.103867                                                |
| 753.182254        | 11.806379                         | 2.228922                                                 |
| 768.834782        | 268.097289                        | 51.665842                                                |
| 785.740953        | 20.095395                         | 3.957801                                                 |

|             |             |            |
|-------------|-------------|------------|
| 850.384997  | 3.940614    | 0.839958   |
| 866.840421  | 0.242051    | 0.052592   |
| 927.017089  | 31.907540   | 7.414112   |
| 929.090330  | 7.842365    | 1.826346   |
| 965.479102  | 0.532817    | 0.128943   |
| 969.101465  | 0.507706    | 0.123327   |
| 989.669400  | 0.088026    | 0.021836   |
| 994.526695  | 24.272529   | 6.050755   |
| 997.715586  | 13.590641   | 3.398793   |
| 1010.894090 | 3.670163    | 0.929970   |
| 1038.273001 | 4.160065    | 1.082654   |
| 1045.826520 | 44.768353   | 11.735696  |
| 1093.657148 | 7.376946    | 2.022255   |
| 1106.077900 | 9.186335    | 2.546866   |
| 1134.422010 | 10.036937   | 2.854000   |
| 1149.385232 | 16.860463   | 4.857504   |
| 1233.932916 | 3.561250    | 1.101469   |
| 1270.254166 | 42.380909   | 13.493946  |
| 1278.850981 | 14.568292   | 4.669890   |
| 1303.039364 | 27.314383   | 8.921276   |
| 1316.179750 | 9.403996    | 3.102457   |
| 1404.377339 | 50.276574   | 17.698137  |
| 1426.617664 | 30.741396   | 10.992823  |
| 1441.361139 | 4.481994    | 1.619281   |
| 1467.445000 | 134.979556  | 49.648702  |
| 1540.435012 | 18.691857   | 7.217286   |
| 1552.877238 | 32.923742   | 12.815170  |
| 1571.023567 | 35.293968   | 13.898286  |
| 1591.987221 | 68.482970   | 27.327521  |
| 1828.854299 | 40.362812   | 18.502849  |
| 1971.625480 | 1277.882119 | 631.528981 |
| 1992.894731 | 768.639633  | 383.959311 |
| 2044.260325 | 930.936758  | 477.017650 |
| 3067.285959 | 76.519647   | 58.830873  |
| 3088.705876 | 0.379677    | 0.293947   |
| 3096.164096 | 7.268422    | 5.640819   |
| 3097.959794 | 1.337303    | 1.038445   |
| 3104.762492 | 10.805516   | 8.409148   |
| 3116.243791 | 21.221169   | 16.575964  |
| 3122.304838 | 6.293228    | 4.925233   |
| 3133.964052 | 4.423935    | 3.475208   |

Zero-Point Energy : 0.186677 a.u.  
===== 5.079729 eV  
(imaginary frequencies were excluded from the summation)

2-phenylpyridine

Geometry CYCLE 10

=====

Energy gradients wrt nuclear displacements

=====

| Atom | Cartesian (a.u./angstrom) |           |           |
|------|---------------------------|-----------|-----------|
|      | X                         | Y         | Z         |
| 1 H  | -0.000080                 | 0.000072  | -0.000062 |
| 2 C  | -0.000222                 | 0.000331  | -0.000151 |
| 3 H  | -0.000093                 | -0.000078 | -0.000043 |
| 4 N  | 0.000913                  | -0.000070 | -0.000028 |
| 5 H  | 0.000030                  | -0.000123 | 0.000086  |
| 6 C  | 0.000228                  | -0.000028 | 0.000016  |
| 7 C  | -0.000639                 | -0.000080 | 0.000465  |
| 8 C  | -0.000016                 | 0.000615  | 0.000287  |
| 9 C  | 0.000052                  | 0.000160  | 0.000041  |
| 10 C | -0.000179                 | 0.000105  | -0.000162 |
| 11 C | 0.001144                  | -0.000093 | -0.001314 |
| 12 C | -0.000735                 | -0.000321 | 0.000741  |
| 13 C | -0.000304                 | 0.000476  | -0.000175 |
| 14 H | -0.000012                 | 0.000000  | -0.000048 |
| 15 H | -0.000031                 | -0.000070 | -0.000037 |
| 16 C | -0.001345                 | -0.000218 | 0.000842  |
| 17 H | 0.000535                  | -0.000570 | 0.000020  |
| 18 C | 0.000154                  | -0.000174 | -0.000132 |
| 19 H | -0.000029                 | 0.000007  | -0.000159 |
| 20 H | 0.000002                  | -0.000008 | 0.000121  |
| 21 H | 0.000628                  | 0.000069  | -0.000307 |

-----  
 Geometry Convergence after Step 10

-----  
 current energy -5.07426174 Hartree  
 abs of energy change 0.00015693 0.00100000 T  
 constrained gradient max 0.00134452 0.01000000 T  
 constrained gradient rms 0.00041207 0.00666667 T  
 gradient max 0.00134452  
 gradient rms 0.00041207  
 cart. step max 0.00928195 0.01000000 T  
 cart. step rms 0.00360907 0.00666667 T

|                                                                 | hartree             | eV         | kcal/mol  | kJ/mol     |
|-----------------------------------------------------------------|---------------------|------------|-----------|------------|
| -----                                                           |                     |            |           |            |
| Pauli Repulsion                                                 |                     |            |           |            |
| Kinetic (Delta T^0):                                            | 53.750943427442877  | 1462.6376  | 33729.23  | 141123.08  |
| Delta V^Pauli Coulomb:                                          | -25.337236283534395 | -689.4613  | -15899.36 | -66522.90  |
| Delta V^Pauli LDA-XC:                                           | -6.889786016223458  | -187.4806  | -4323.41  | -18089.13  |
| Delta V^Pauli GGA-Exchange:                                     | 0.341997090253770   | 9.3062     | 214.61    | 897.91     |
| Delta V^Pauli GGA-Correlation:                                  | -0.076419058426816  | -2.0795    | -47.95    | -200.64    |
| -----                                                           |                     |            |           |            |
| Total Pauli Repulsion:                                          | 21.789499159511980  | 592.9224   | 13673.12  | 57208.32   |
| (Total Pauli Repulsion =<br>Delta E^Pauli in BB paper)          |                     |            |           |            |
| Steric Interaction                                              |                     |            |           |            |
| Pauli Repulsion (Delta E^Pauli):                                | 21.789499159511980  | 592.9224   | 13673.12  | 57208.32   |
| Electrostatic Interaction:                                      | -4.250868290679326  | -115.6720  | -2667.46  | -11160.65  |
| (Electrostatic Interaction =<br>Delta V_elstat in the BB paper) |                     |            |           |            |
| -----                                                           |                     |            |           |            |
| Total Steric Interaction:                                       | 17.538630868832655  | 477.2504   | 11005.66  | 46047.67   |
| (Total Steric Interaction =<br>Delta E^0 in the BB paper)       |                     |            |           |            |
| Orbital Interactions                                            |                     |            |           |            |
| A:                                                              | -22.589648662702398 | -614.6956  | -14175.22 | -59309.11  |
| -----                                                           |                     |            |           |            |
| Total Orbital Interactions:                                     | -22.592967857816575 | -614.7859  | -14177.30 | -59317.83  |
| Alternative Decomposition Orb.Int.                              |                     |            |           |            |
| Kinetic:                                                        | -49.003265054692001 | -1333.4467 | -30750.02 | -128658.05 |
| Coulomb:                                                        | 24.379391397076809  | 663.3970   | 15298.30  | 64008.08   |
| XC:                                                             | 2.030905799798620   | 55.2638    | 1274.41   | 5332.14    |
| -----                                                           |                     |            |           |            |
| Total Orbital Interactions:                                     | -22.592967857816575 | -614.7859  | -14177.30 | -59317.83  |

Electronic Supplementary Information for Dalton Transactions  
 This journal is © The Royal Society of Chemistry 2010

|                               |                    |           |          |           |
|-------------------------------|--------------------|-----------|----------|-----------|
| Residu (E=Steric+OrbInt+Res): | -0.000001155231089 | 0.0000    | 0.00     | 0.00      |
| Dispersion Energy:            | -0.019923605248032 | -0.5421   | -12.50   | -52.31    |
| Total Bonding Energy:         | -5.074261749463041 | -138.0777 | -3184.15 | -13322.47 |

Summary of Bonding Energy (energy terms are taken from the energy decomposition above)

|                                 |                    |           |          |           |
|---------------------------------|--------------------|-----------|----------|-----------|
| Electrostatic Energy:           | -4.250868290679326 | -115.6720 | -2667.46 | -11160.65 |
| Kinetic Energy:                 | 4.747678372750876  | 129.1909  | 2979.21  | 12465.03  |
| Coulomb (Steric+OrbInt) Energy: | -0.957846041688676 | -26.0643  | -601.06  | -2514.82  |
| XC Energy:                      | -4.593302184597884 | -124.9901 | -2882.34 | -12059.71 |
| Dispersion Energy:              | -0.019923605248032 | -0.5421   | -12.50   | -52.31    |
| Total Bonding Energy:           | -5.074261749463042 | -138.0777 | -3184.15 | -13322.47 |

FRAGMENT ENERGY TERMS \*\*\* (summed over all fragments) \*\*\*

The energy terms below are (parts of) the Total Energy of the fragments from which the molecule is built.

|                          |                     |            |           |            |
|--------------------------|---------------------|------------|-----------|------------|
| Exchange and Correlation |                     |            |           |            |
| Exchange LDA:            | -55.694381000244476 | -1515.5212 | -34948.76 | -146225.58 |
| Exchange GGA:            | -7.415011738029785  | -201.7727  | -4652.99  | -19468.11  |
| Correlation LDA:         | -4.924027758487175  | -133.9896  | -3089.87  | -12928.03  |
| Correlation GGA:         | 2.624283520981801   | 71.4104    | 1646.76   | 6890.06    |
| Total XC:                | -65.409136975779631 | -1779.8732 | -41044.86 | -171731.66 |

Intensities

=====

| Frequency<br>cm-1 | Dipole Strength<br>e-40 esu2 cm2 | Absorption Intensity (degeneracy not counted)<br>km/mole |
|-------------------|----------------------------------|----------------------------------------------------------|
| 60.966518         | 80.540165                        | 1.230784                                                 |
| 86.652233         | 78.204115                        | 1.698586                                                 |
| 145.673327        | 48.387298                        | 1.766808                                                 |
| 243.504815        | 7.337695                         | 0.447863                                                 |
| 323.935154        | 0.379930                         | 0.030849                                                 |
| 380.028512        | 26.013306                        | 2.477934                                                 |
| 400.477488        | 9.766874                         | 0.980419                                                 |
| 405.135117        | 12.065469                        | 1.225243                                                 |
| 466.240966        | 34.520411                        | 4.034265                                                 |
| 543.418576        | 5.375337                         | 0.732181                                                 |
| 607.334171        | 22.887383                        | 3.484191                                                 |
| 618.769439        | 34.215301                        | 5.306734                                                 |
| 632.762008        | 25.013990                        | 3.967358                                                 |
| 684.784203        | 184.459975                       | 31.661680                                                |
| 728.541748        | 350.307637                       | 63.970850                                                |
| 731.089056        | 80.508195                        | 14.753275                                                |
| 749.063935        | 1.253239                         | 0.235305                                                 |
| 788.779001        | 21.628306                        | 4.276179                                                 |
| 824.543500        | 2.349649                         | 0.485618                                                 |
| 868.657522        | 1.465259                         | 0.319037                                                 |
| 904.662115        | 3.545737                         | 0.804028                                                 |
| 942.336470        | 0.478715                         | 0.113074                                                 |
| 952.101276        | 2.553131                         | 0.609304                                                 |
| 967.813276        | 2.497334                         | 0.605824                                                 |
| 970.943841        | 0.691736                         | 0.168350                                                 |
| 973.280170        | 10.145281                        | 2.475027                                                 |
| 989.385150        | 0.056221                         | 0.013942                                                 |
| 1008.912094       | 48.436135                        | 12.249007                                                |
| 1030.942639       | 2.989883                         | 0.772621                                                 |
| 1047.915192       | 3.373903                         | 0.886210                                                 |
| 1072.863169       | 29.169681                        | 7.844298                                                 |
| 1081.168036       | 17.030442                        | 4.615271                                                 |
| 1131.899449       | 8.423080                         | 2.389774                                                 |
| 1137.004328       | 2.266749                         | 0.646017                                                 |
| 1167.106044       | 15.311677                        | 4.479310                                                 |
| 1258.218728       | 9.362917                         | 2.952877                                                 |
| 1269.068349       | 26.755248                        | 8.510833                                                 |
| 1287.262825       | 15.759541                        | 5.084976                                                 |
| 1305.132507       | 1.376808                         | 0.450408                                                 |
| 1331.123125       | 1.212357                         | 0.404508                                                 |
| 1403.847930       | 51.872312                        | 18.252978                                                |
| 1432.238903       | 68.344761                        | 24.535718                                                |
| 1450.153498       | 67.220867                        | 24.434089                                                |
| 1480.791873       | 4.993744                         | 1.853525                                                 |
| 1548.500107       | 46.213732                        | 17.937435                                                |
| 1568.822854       | 33.117420                        | 13.022923                                                |
| 1573.290431       | 157.270762                       | 62.020457                                                |

Electronic Supplementary Information for Dalton Transactions  
This journal is © The Royal Society of Chemistry 2010

|             |           |           |
|-------------|-----------|-----------|
| 1590.661928 | 5.919574  | 2.360187  |
| 3061.736760 | 27.340666 | 20.982393 |
| 3082.389800 | 1.383800  | 1.069151  |
| 3086.582595 | 5.359213  | 4.146264  |
| 3090.627173 | 11.627141 | 9.007362  |
| 3099.321073 | 28.270635 | 21.962420 |
| 3105.042737 | 7.456810  | 5.803617  |
| 3108.825610 | 19.905120 | 15.510980 |
| 3116.090259 | 7.650091  | 5.975231  |
| 3120.301670 | 4.678401  | 3.659081  |

Zero-Point Energy : 0.164116 a.u.  
===== 4.465831 eV

*in THF (COSMO, Klamt's adjustment for van der Waals radii)*



NH<sub>3</sub>BH<sub>3</sub>

Geometry CYCLE 5  
 =====

Energy gradients wrt nuclear displacements  
 =====

| Atom | Cartesian (a.u./angstrom) |           |           |
|------|---------------------------|-----------|-----------|
|      | X                         | Y         | Z         |
| 1 N  | 0.000002                  | 0.000358  | -0.000349 |
| 2 H  | 0.000079                  | -0.000089 | 0.000085  |
| 3 H  | -0.000042                 | -0.000116 | 0.000056  |
| 4 H  | -0.000031                 | -0.000074 | 0.000053  |
| 5 B  | -0.000018                 | -0.000037 | 0.000133  |
| 6 H  | -0.000002                 | 0.000099  | 0.000095  |
| 7 H  | 0.000144                  | -0.000069 | -0.000022 |
| 8 H  | -0.000132                 | -0.000072 | -0.000053 |

-----  
 Geometry Convergence after Step 5  
 -----

current energy -1.35971512 Hartree  
 abs of energy change 0.00000445 0.00100000 T  
 constrained gradient max 0.00035756 0.00100000 T  
 constrained gradient rms 0.00012714 0.00066667 T  
 gradient max 0.00035756  
 gradient rms 0.00012714  
 cart. step max 0.00013643 0.01000000 T  
 cart. step rms 0.00008052 0.00666667 T

|                                                                 | hartree            | eV        | kcal/mol | kJ/mol    |
|-----------------------------------------------------------------|--------------------|-----------|----------|-----------|
| -----                                                           |                    |           |          |           |
| Pauli Repulsion                                                 |                    |           |          |           |
| Kinetic (Delta T^0):                                            | 9.57833233235185   | 260.6397  | 6010.50  | 25147.91  |
| Delta V^Pauli Coulomb:                                          | -4.298219657933766 | -116.9605 | -2697.17 | -11284.97 |
| Delta V^Pauli LDA-XC:                                           | -1.342114981681921 | -36.5208  | -842.19  | -3523.72  |
| Delta V^Pauli GGA-Exchange:                                     | 0.060272982455995  | 1.6401    | 37.82    | 158.25    |
| Delta V^Pauli GGA-Correlation:                                  | -0.013959113847257 | -0.3798   | -8.76    | -36.65    |
| -----                                                           |                    |           |          |           |
| Total Pauli Repulsion:                                          | 3.984312462228236  | 108.4187  | 2500.19  | 10460.81  |
| (Total Pauli Repulsion =<br>Delta E^Pauli in BB paper)          |                    |           |          |           |
| Steric Interaction                                              |                    |           |          |           |
| Pauli Repulsion (Delta E^Pauli):                                | 3.984312462228236  | 108.4187  | 2500.19  | 10460.81  |
| Electrostatic Interaction:                                      | -0.682550218650939 | -18.5731  | -428.31  | -1792.04  |
| (Electrostatic Interaction =<br>Delta V_elstat in the BB paper) |                    |           |          |           |
| -----                                                           |                    |           |          |           |
| Total Steric Interaction:                                       | 3.301762243577297  | 89.8455   | 2071.89  | 8668.78   |
| (Total Steric Interaction =<br>Delta E^0 in the BB paper)       |                    |           |          |           |
| Orbital Interactions                                            |                    |           |          |           |
| A:                                                              | -4.633701989692250 | -126.0894 | -2907.69 | -12165.78 |
| -----                                                           |                    |           |          |           |
| Total Orbital Interactions:                                     | -4.633861506869699 | -126.0938 | -2907.79 | -12166.20 |
| Alternative Decomposition Orb.Int.                              |                    |           |          |           |
| Kinetic:                                                        | -8.354691956024656 | -227.3427 | -5242.65 | -21935.24 |
| Coulomb:                                                        | 3.596657776549654  | 97.8700   | 2256.94  | 9443.02   |
| XC:                                                             | 0.124172672605301  | 3.3789    | 77.92    | 326.02    |
| -----                                                           |                    |           |          |           |
| Total Orbital Interactions:                                     | -4.633861506869701 | -126.0938 | -2907.79 | -12166.20 |
| Residu (E=Steric+OrbInt+Res):                                   | 0.000000067859353  | 0.0000    | 0.00     | 0.00      |
| -----                                                           |                    |           |          |           |
| Solvation Energy (el):                                          | -0.025562558540520 | -0.6956   | -16.04   | -67.11    |
| Dispersion Energy:                                              | -0.004613073683357 | -0.1255   | -2.89    | -12.11    |
| -----                                                           |                    |           |          |           |
| Post-SCF Solvation Energies                                     |                    |           |          |           |
| Solvation Energy (cd):                                          | 0.002559705827860  | 0.0697    | 1.61     | 6.72      |
| Total Bonding Energy:                                           | -1.359715121829066 | -36.9997  | -853.23  | -3569.93  |

Electronic Supplementary Information for Dalton Transactions  
 This journal is © The Royal Society of Chemistry 2010

Summary of Bonding Energy (energy terms are taken from the energy decomposition above)

```

=====
Electrostatic Energy:          -0.682550218650939      -18.5731      -428.31      -1792.04
Kinetic Energy:                1.223641277210529        33.2970       767.85      3212.67
Coulomb (Steric+OrbInt) Energy: -0.701561813524759      -19.0905      -440.24      -1841.95
XC Energy:                     -1.171628440467882      -31.8816      -735.21      -3076.11
Solvation:                     -0.023002852712660        -0.6259       -14.43       -60.39
Dispersion Energy:            -0.004613073683357        -0.1255        -2.89       -12.11
-----
Total Bonding Energy:         -1.359715121829068      -36.9997      -853.23      -3569.93
    
```

F R A G M E N T   E N E R G Y   T E R M S   \*\*\* (summed over all fragments) \*\*\*

The energy terms below are (parts of) the Total Energy of the fragments from which the molecule is built.

```

Exchange and Correlation
Exchange LDA:                  -10.155392078725320      -276.3423      -6372.61      -26662.98
Exchange GGA:                  -1.418172567525287       -38.5904       -889.92       -3723.41
Correlation LDA:               -0.992813020778647       -27.0158       -623.00       -2606.63
Correlation GGA:               0.540448767116546        14.7064        339.14        1418.95
-----
Total XC:                      -12.025928899912710      -327.2422      -7546.39      -31574.07
    
```

Intensities  
 =====

| Frequency<br>cm-1 | Dipole Strength<br>1e-40 esu2 cm2 | Absorption Intensity (degeneracy not counted)<br>km/mole |
|-------------------|-----------------------------------|----------------------------------------------------------|
| 240.181751        | 0.057122                          | 0.003439                                                 |
| 622.236017        | 12.062508                         | 1.881355                                                 |
| 623.881118        | 10.778379                         | 1.685518                                                 |
| 695.049555        | 22.144284                         | 3.857940                                                 |
| 1040.431032       | 113.055507                        | 29.483775                                                |
| 1040.686680       | 111.686674                        | 29.133954                                                |
| 1164.809061       | 410.738948                        | 119.921954                                               |
| 1171.885730       | 10.447570                         | 3.068871                                                 |
| 1172.425983       | 10.115206                         | 2.972612                                                 |
| 1321.094255       | 239.811877                        | 79.411347                                                |
| 1619.803991       | 57.988635                         | 23.544172                                                |
| 1620.725357       | 58.773494                         | 23.876409                                                |
| 2392.991674       | 94.369024                         | 56.604208                                                |
| 2401.290056       | 397.279892                        | 239.121858                                               |
| 2402.135589       | 395.753105                        | 238.286764                                               |
| 3339.430214       | 0.166262                          | 0.139169                                                 |
| 3439.206065       | 35.598052                         | 30.687570                                                |
| 3440.305437       | 35.639986                         | 30.733540                                                |

```

Zero-Point Energy :      0.067772 a.u.
=====
                      1.844176 eV
    
```

NH2BH2

Geometry CYCLE 5  
 =====

Energy gradients wrt nuclear displacements  
 =====

| Atom | Cartesian (a.u./angstrom) |           |           |
|------|---------------------------|-----------|-----------|
|      | X                         | Y         | Z         |
| 1 N  | 0.000250                  | 0.000208  | -0.000567 |
| 2 H  | 0.000062                  | -0.000363 | 0.000124  |
| 3 H  | -0.000214                 | 0.000245  | 0.000212  |
| 4 B  | -0.000288                 | -0.000248 | 0.000679  |
| 5 H  | -0.000131                 | 0.000018  | -0.000323 |
| 6 H  | 0.000322                  | 0.000140  | -0.000124 |

-----  
 Geometry Convergence after Step 5  
 -----

|                                                                 |                    |             |         |          |           |
|-----------------------------------------------------------------|--------------------|-------------|---------|----------|-----------|
| current energy                                                  |                    | -1.09453802 | Hartree |          |           |
| abs of energy change                                            | 0.00000281         | 0.00100000  | T       |          |           |
| constrained gradient max                                        | 0.00067908         | 0.00100000  | T       |          |           |
| constrained gradient rms                                        | 0.00029779         | 0.00066667  | T       |          |           |
| gradient max                                                    | 0.00067908         |             |         |          |           |
| gradient rms                                                    | 0.00029779         |             |         |          |           |
| cart. step max                                                  | 0.00220744         | 0.01000000  | T       |          |           |
| cart. step rms                                                  | 0.00093890         | 0.00666667  | T       |          |           |
|                                                                 |                    | hartree     | eV      | kcal/mol | kJ/mol    |
| Pauli Repulsion                                                 |                    |             |         |          |           |
| Kinetic (Delta T^0):                                            | 8.332834058559401  | 226.7480    |         | 5228.93  | 21877.85  |
| Delta V^Pauli Coulomb:                                          | -3.789447231158996 | -103.1161   |         | -2377.91 | -9949.19  |
| Delta V^Pauli LDA-XC:                                           | -1.105158697861239 | -30.0729    |         | -693.50  | -2901.59  |
| Delta V^Pauli GGA-Exchange:                                     | 0.043066613630098  | 1.1719      |         | 27.02    | 113.07    |
| Delta V^Pauli GGA-Correlation:                                  | -0.007760612150041 | -0.2112     |         | -4.87    | -20.38    |
| Total Pauli Repulsion:                                          | 3.473534131019223  | 94.5197     |         | 2179.68  | 9119.76   |
| (Total Pauli Repulsion =<br>Delta E^Pauli in BB paper)          |                    |             |         |          |           |
| Steric Interaction                                              |                    |             |         |          |           |
| Pauli Repulsion (Delta E^Pauli):                                | 3.473534131019223  | 94.5197     |         | 2179.68  | 9119.76   |
| Electrostatic Interaction:                                      | -0.583616033854117 | -15.8810    |         | -366.22  | -1532.28  |
| (Electrostatic Interaction =<br>Delta V_elstat in the BB paper) |                    |             |         |          |           |
| Total Steric Interaction:                                       | 2.889918097165106  | 78.6387     |         | 1813.45  | 7587.48   |
| (Total Steric Interaction =<br>Delta E^0 in the BB paper)       |                    |             |         |          |           |
| Orbital Interactions                                            |                    |             |         |          |           |
| A:                                                              | -3.978107461419179 | -108.2498   |         | -2496.30 | -10444.52 |
| Total Orbital Interactions:                                     | -3.979213163097453 | -108.2799   |         | -2496.99 | -10447.42 |
| Alternative Decomposition Orb.Int.                              |                    |             |         |          |           |
| Kinetic:                                                        | -7.331935286040679 | -199.5121   |         | -4600.86 | -19249.99 |
| Coulomb:                                                        | 3.233269337615498  | 87.9817     |         | 2028.91  | 8488.95   |
| XC:                                                             | 0.119452785327727  | 3.2505      |         | 74.96    | 313.62    |
| Total Orbital Interactions:                                     | -3.979213163097454 | -108.2799   |         | -2496.99 | -10447.42 |
| Residu (E=Steric+OrbInt+Res):                                   | 0.000000054269767  | 0.0000      |         | 0.00     | 0.00      |
| Solvation Energy (el):                                          | -0.005759564470140 | -0.1567     |         | -3.61    | -15.12    |
| Dispersion Energy:                                              | -0.001973975207514 | -0.0537     |         | -1.24    | -5.18     |
| Post-SCF Solvation Energies                                     |                    |             |         |          |           |
| Solvation Energy (cd):                                          | 0.002486317400511  | 0.0677      |         | 1.56     | 6.53      |
| Total Bonding Energy:                                           | -1.094542233939723 | -29.7840    |         | -686.84  | -2873.72  |

Summary of Bonding Energy (energy terms are taken from the energy decomposition above)  
 =====

## Electronic Supplementary Information for Dalton Transactions

This journal is © The Royal Society of Chemistry 2010

|                                 |                    |          |         |          |
|---------------------------------|--------------------|----------|---------|----------|
| Electrostatic Energy:           | -0.583616033854117 | -15.8810 | -366.22 | -1532.28 |
| Kinetic Energy:                 | 1.000898772518722  | 27.2358  | 628.07  | 2627.86  |
| Coulomb (Steric+OrbInt) Energy: | -0.556177839273731 | -15.1344 | -349.01 | -1460.24 |
| XC Energy:                      | -0.950399911053455 | -25.8617 | -596.39 | -2495.27 |
| Solvation:                      | -0.003273247069629 | -0.0891  | -2.05   | -8.59    |
| Dispersion Energy:              | -0.001973975207514 | -0.0537  | -1.24   | -5.18    |
|                                 | -----              | -----    | -----   | -----    |
| Total Bonding Energy:           | -1.094542233939724 | -29.7840 | -686.84 | -2873.72 |

F R A G M E N T E N E R G Y T E R M S \*\*\* (summed over all fragments) \*\*\*

The energy terms below are (parts of) the Total Energy of the fragments from which the molecule is built.

|                          |                     |           |          |           |
|--------------------------|---------------------|-----------|----------|-----------|
| Exchange and Correlation |                     |           |          |           |
| Exchange LDA:            | -9.758669988090588  | -265.5469 | -6123.66 | -25621.38 |
| Exchange GGA:            | -1.330698961091227  | -36.2102  | -835.03  | -3493.75  |
| Correlation LDA:         | -0.912972661612320  | -24.8433  | -572.90  | -2397.01  |
| Correlation GGA:         | 0.492783341635344   | 13.4093   | 309.23   | 1293.80   |
|                          | -----               | -----     | -----    | -----     |
| Total XC:                | -11.509558269158791 | -313.1910 | -7222.36 | -30218.34 |

Intensities  
=====

| Frequency<br>cm-1 | Dipole Strength<br>1e-40 esu2 cm2 | Absorption Intensity (degeneracy not counted)<br>km/mole |
|-------------------|-----------------------------------|----------------------------------------------------------|
| -----             | -----                             | -----                                                    |
| 583.882743        | 1729.878409                       | 253.174108                                               |
| 701.379111        | 0.768776                          | 0.135155                                                 |
| 829.569159        | 0.412421                          | 0.085757                                                 |
| 954.159172        | 140.325570                        | 33.561063                                                |
| 1075.916850       | 224.980139                        | 60.673767                                                |
| 1117.903632       | 1.721549                          | 0.482394                                                 |
| 1314.897856       | 214.441610                        | 70.677169                                                |
| 1556.008929       | 317.429806                        | 123.804907                                               |
| 2506.277834       | 232.477122                        | 146.045273                                               |
| 2552.701915       | 389.838858                        | 249.438393                                               |
| 3453.181345       | 65.180513                         | 56.417681                                                |
| 3552.465387       | 87.952278                         | 78.316815                                                |

Zero-Point Energy : 0.046015 a.u.  
===== 1.252138 eV

THF

Geometry CYCLE 5  
 =====

Energy gradients wrt nuclear displacements  
 =====

| Atom | Cartesian (a.u./angstrom) |           |           |
|------|---------------------------|-----------|-----------|
|      | X                         | Y         | Z         |
| 1 O  | 0.000001                  | 0.000080  | -0.000009 |
| 2 C  | -0.000013                 | -0.000247 | -0.000269 |
| 3 C  | -0.000077                 | 0.000311  | 0.000251  |
| 4 C  | -0.000229                 | 0.000132  | 0.000099  |
| 5 C  | 0.000270                  | -0.000053 | -0.000192 |
| 6 H  | -0.000048                 | 0.000008  | 0.000138  |
| 7 H  | 0.000063                  | 0.000094  | 0.000027  |
| 8 H  | 0.000004                  | -0.000003 | -0.000076 |
| 9 H  | 0.000132                  | -0.000118 | -0.000019 |
| 10 H | -0.000004                 | -0.000060 | -0.000052 |
| 11 H | 0.000014                  | -0.000160 | -0.000001 |
| 12 H | -0.000041                 | 0.000071  | -0.000026 |
| 13 H | -0.000072                 | -0.000056 | 0.000129  |

-----  
 Geometry Convergence after Step 5  
 -----

|                          |                     |            |   |
|--------------------------|---------------------|------------|---|
| current energy           | -2.61574372 Hartree |            |   |
| abs of energy change     | 0.00000779          | 0.00100000 | T |
| constrained gradient max | 0.00031061          | 0.00100000 | T |
| constrained gradient rms | 0.00012759          | 0.00066667 | T |
| gradient max             | 0.00031061          |            |   |
| gradient rms             | 0.00012759          |            |   |
| cart. step max           | 0.00107247          | 0.01000000 | T |
| cart. step rms           | 0.00043968          | 0.00666667 | T |

|                                                                 | hartree             | eV        | kcal/mol  | kJ/mol    |
|-----------------------------------------------------------------|---------------------|-----------|-----------|-----------|
| -----                                                           |                     |           |           |           |
| Pauli Repulsion                                                 |                     |           |           |           |
| Kinetic (Delta T^0):                                            | 22.795242261208546  | 620.2901  | 14304.23  | 59848.90  |
| Delta V^Pauli Coulomb:                                          | -10.986849917738530 | -298.9674 | -6894.35  | -28845.97 |
| Delta V^Pauli LDA-XC:                                           | -3.091722927067142  | -84.1301  | -1940.09  | -8117.32  |
| Delta V^Pauli GGA-Exchange:                                     | 0.175246912809191   | 4.7687    | 109.97    | 460.11    |
| Delta V^Pauli GGA-Correlation:                                  | -0.048906985974652  | -1.3308   | -30.69    | -128.41   |
| Total Pauli Repulsion:                                          | 8.843009343237414   | 240.6305  | 5549.07   | 23217.32  |
| (Total Pauli Repulsion =<br>Delta E^Pauli in BB paper)          |                     |           |           |           |
| Steric Interaction                                              |                     |           |           |           |
| Pauli Repulsion (Delta E^Pauli):                                | 8.843009343237414   | 240.6305  | 5549.07   | 23217.32  |
| Electrostatic Interaction:                                      | -1.774611127339901  | -48.2896  | -1113.59  | -4659.24  |
| (Electrostatic Interaction =<br>Delta V_elstat in the BB paper) |                     |           |           |           |
| Total Steric Interaction:                                       | 7.068398215897512   | 192.3409  | 4435.49   | 18558.08  |
| (Total Steric Interaction =<br>Delta E^0 in the BB paper)       |                     |           |           |           |
| Orbital Interactions                                            |                     |           |           |           |
| A:                                                              | -9.668077393500647  | -263.0818 | -6066.81  | -25383.53 |
| Total Orbital Interactions:                                     | -9.669740393666121  | -263.1270 | -6067.85  | -25387.90 |
| Alternative Decomposition Orb.Int.                              |                     |           |           |           |
| Kinetic:                                                        | -20.390350147741888 | -554.8497 | -12795.14 | -53534.86 |
| Coulomb:                                                        | 10.114883350759772  | 275.2400  | 6347.19   | 26556.62  |
| XC:                                                             | 0.605726403315997   | 16.4827   | 380.10    | 1590.33   |
| Total Orbital Interactions:                                     | -9.669740393666119  | -263.1270 | -6067.85  | -25387.90 |
| Residu (E=Steric+OrbInt+Res):                                   | 0.000000585965072   | 0.0000    | 0.00      | 0.00      |
| Solvation Energy (el):                                          | -0.006781716441528  | -0.1845   | -4.26     | -17.81    |
| Dispersion Energy:                                              | -0.010518110295366  | -0.2862   | -6.60     | -27.62    |
| Post-SCF Solvation Energies                                     |                     |           |           |           |
| Solvation Energy (cd):                                          | 0.002897708019752   | 0.0789    | 1.82      | 7.61      |

Electronic Supplementary Information for Dalton Transactions  
 This journal is © The Royal Society of Chemistry 2010

Total Bonding Energy: -2.615743710520678 -71.1780 -1641.40 -6867.63

Summary of Bonding Energy (energy terms are taken from the energy decomposition above)

|                                 |                    |          |          |          |
|---------------------------------|--------------------|----------|----------|----------|
| Electrostatic Energy:           | -1.774611127339901 | -48.2896 | -1113.59 | -4659.24 |
| Kinetic Energy:                 | 2.404892113466659  | 65.4404  | 1509.09  | 6314.04  |
| Coulomb (Steric+OrbInt) Energy: | -0.871965981013686 | -23.7274 | -547.17  | -2289.35 |
| XC Energy:                      | -2.359656596916605 | -64.2095 | -1480.71 | -6195.28 |
| Solvation:                      | -0.003884008421777 | -0.1057  | -2.44    | -10.20   |
| Dispersion Energy:              | -0.010518110295366 | -0.2862  | -6.60    | -27.62   |
| Total Bonding Energy:           | -2.615743710520676 | -71.1780 | -1641.40 | -6867.63 |

FRAGMENT ENERGY TERMS \*\*\* (summed over all fragments) \*\*\*

The energy terms below are (parts of) the Total Energy of the fragments from which the molecule is built.

|                  |                     |           |           |           |
|------------------|---------------------|-----------|-----------|-----------|
| Exchange LDA:    | -26.366660279493701 | -717.4733 | -16545.33 | -69225.66 |
| Exchange GGA:    | -3.477285504494469  | -94.6218  | -2182.03  | -9129.61  |
| Correlation LDA: | -2.361507049692932  | -64.2599  | -1481.87  | -6200.14  |
| Correlation GGA: | 1.254082082242942   | 34.1253   | 786.95    | 3292.59   |
| Total XC:        | -30.951370751438159 | -842.2297 | -19422.28 | -81262.81 |

Intensities

=====

| Frequency<br>cm-1 | Dipole Strength<br>e-40 esu2 cm2 | Absorption Intensity (degeneracy not counted)<br>km/mole |
|-------------------|----------------------------------|----------------------------------------------------------|
| 21.855804         | 21.253197                        | 0.116431                                                 |
| 275.586454        | 206.665817                       | 14.275936                                                |
| 604.395886        | 46.194302                        | 6.998226                                                 |
| 623.533059        | 26.913492                        | 4.206371                                                 |
| 762.563836        | 59.207259                        | 11.316946                                                |
| 826.423602        | 56.641876                        | 11.733252                                                |
| 866.193448        | 133.681869                       | 29.024548                                                |
| 883.527004        | 233.925510                       | 51.805454                                                |
| 893.556563        | 10.336047                        | 2.315019                                                 |
| 911.272850        | 42.697409                        | 9.752771                                                 |
| 996.616420        | 23.696150                        | 5.919485                                                 |
| 1012.934259       | 443.667539                       | 112.646314                                               |
| 1098.184728       | 6.340686                         | 1.745379                                                 |
| 1150.851264       | 37.662867                        | 10.864523                                                |
| 1171.140263       | 15.954364                        | 4.683456                                                 |
| 1199.508876       | 36.673271                        | 11.026335                                                |
| 1209.679954       | 36.823422                        | 11.165359                                                |
| 1250.406457       | 13.676030                        | 4.286367                                                 |
| 1263.075030       | 4.061320                         | 1.285803                                                 |
| 1298.595306       | 0.469558                         | 0.152842                                                 |
| 1329.504786       | 13.984738                        | 4.660390                                                 |
| 1415.316194       | 12.029075                        | 4.267404                                                 |
| 1424.845340       | 41.274025                        | 14.740853                                                |
| 1433.433780       | 1.516433                         | 0.544852                                                 |
| 1440.338123       | 4.043245                         | 1.459730                                                 |
| 2881.905609       | 128.471034                       | 92.803219                                                |
| 2889.134375       | 136.290073                       | 98.698383                                                |
| 2958.918684       | 50.947499                        | 37.786265                                                |
| 2968.892790       | 55.976948                        | 41.656407                                                |
| 3005.449815       | 34.259876                        | 25.809128                                                |
| 3013.128901       | 5.311986                         | 4.011924                                                 |
| 3016.957686       | 19.325132                        | 14.614022                                                |
| 3026.686382       | 90.419272                        | 68.597217                                                |

Zero-Point Energy : 0.111914 a.u.  
 =====  
 3.045325 eV

H2

Geometry CYCLE 4  
 =====

Energy gradients wrt nuclear displacements  
 =====

| Atom | Cartesian (a.u./angstrom) |          |           |
|------|---------------------------|----------|-----------|
|      | X                         | Y        | Z         |
| 1 H  | 0.000000                  | 0.000000 | 0.000250  |
| 2 H  | 0.000000                  | 0.000000 | -0.000250 |

-----  
 Geometry Convergence after Step 4  
 -----

|                          |                     |            |   |
|--------------------------|---------------------|------------|---|
| current energy           | -0.24537743 Hartree |            |   |
| abs of energy change     | 0.00000003          | 0.00100000 | T |
| constrained gradient max | 0.00024982          | 0.00100000 | T |
| constrained gradient rms | 0.00014423          | 0.00066667 | T |
| gradient max             | 0.00024982          |            |   |
| gradient rms             | 0.00014423          |            |   |
| cart. step max           | 0.00010004          | 0.01000000 | T |
| cart. step rms           | 0.00005776          | 0.00666667 | T |

|                                                                 | hartree            | eV       | kcal/mol | kJ/mol   |
|-----------------------------------------------------------------|--------------------|----------|----------|----------|
|                                                                 | -----              | -----    | -----    | -----    |
| <b>Pauli Repulsion</b>                                          |                    |          |          |          |
| Kinetic (Delta T^0):                                            | 0.585917215084310  | 15.9436  | 367.67   | 1538.33  |
| Delta V^Pauli Coulomb:                                          | -0.124022409024830 | -3.3748  | -77.83   | -325.62  |
| Delta V^Pauli LDA-XC:                                           | -0.093537992820664 | -2.5453  | -58.70   | -245.58  |
| Delta V^Pauli GGA-Exchange:                                     | -0.002576452444738 | -0.0701  | -1.62    | -6.76    |
| Delta V^Pauli GGA-Correlation:                                  | 0.001749756938793  | 0.0476   | 1.10     | 4.59     |
| Total Pauli Repulsion:                                          | 0.367530117732872  | 10.0010  | 230.63   | 964.95   |
| (Total Pauli Repulsion =<br>Delta E^Pauli in the BB paper)      |                    |          |          |          |
| <b>Steric Interaction</b>                                       |                    |          |          |          |
| Pauli Repulsion (Delta E^Pauli):                                | 0.367530117732872  | 10.0010  | 230.63   | 964.95   |
| Electrostatic Interaction:                                      | 0.008957703470661  | 0.2438   | 5.62     | 23.52    |
| (Electrostatic Interaction =<br>Delta V_elstat in the BB paper) |                    |          |          |          |
| Total Steric Interaction:                                       | 0.376487821203533  | 10.2448  | 236.25   | 988.47   |
| (Total Steric Interaction =<br>Delta E^0 in the BB paper)       |                    |          |          |          |
| <b>Orbital Interactions</b>                                     |                    |          |          |          |
| SIGMA.g:                                                        | -0.478126745568888 | -13.0105 | -300.03  | -1255.32 |
| SIGMA.u:                                                        | -0.145241229367401 | -3.9522  | -91.14   | -381.33  |
| PI.g:                                                           | 0.000000000000000  | 0.0000   | 0.00     | 0.00     |
| PI.u:                                                           | 0.000000000000000  | 0.0000   | 0.00     | 0.00     |
| Total Orbital Interactions:                                     | -0.623496371334037 | -16.9662 | -391.25  | -1636.99 |
| <b>Alternative Decomposition Orb.Int.</b>                       |                    |          |          |          |
| Kinetic:                                                        | -0.348501058707706 | -9.4832  | -218.69  | -914.99  |
| Coulomb:                                                        | -0.186601353353172 | -5.0777  | -117.09  | -489.92  |
| XC:                                                             | -0.088393959273159 | -2.4053  | -55.47   | -232.08  |
| Total Orbital Interactions:                                     | -0.623496371334037 | -16.9662 | -391.25  | -1636.99 |
| Residu (E=Steric+OrbInt+Res):                                   | 0.000000007373625  | 0.0000   | 0.00     | 0.00     |
| Solvation Energy (el):                                          | -0.000451849712643 | -0.0123  | -0.28    | -1.19    |
| Dispersion Energy:                                              | -0.000001165736921 | 0.0000   | 0.00     | 0.00     |
| <b>Post-SCF Solvation Energies</b>                              |                    |          |          |          |
| Solvation Energy (cd):                                          | 0.002084128264735  | 0.0567   | 1.31     | 5.47     |
| Total Bonding Energy:                                           | -0.245377429941709 | -6.6771  | -153.98  | -644.24  |

Summary of Bonding Energy (energy terms are taken from the energy decomposition above)  
 =====

|                       |                   |        |      |       |
|-----------------------|-------------------|--------|------|-------|
| Electrostatic Energy: | 0.008957703470661 | 0.2438 | 5.62 | 23.52 |
|-----------------------|-------------------|--------|------|-------|

## Electronic Supplementary Information for Dalton Transactions

This journal is © The Royal Society of Chemistry 2010

|                                 |                    |         |         |         |
|---------------------------------|--------------------|---------|---------|---------|
| Kinetic Energy:                 | 0.237416156376605  | 6.4604  | 148.98  | 623.34  |
| Coulomb (Steric+OrbInt) Energy: | -0.310623755004378 | -8.4525 | -194.92 | -815.54 |
| XC Energy:                      | -0.182758647599767 | -4.9731 | -114.68 | -479.83 |
| Solvation:                      | 0.001632278552092  | 0.0444  | 1.02    | 4.29    |
| Dispersion Energy:              | -0.000001165736921 | 0.0000  | 0.00    | 0.00    |
|                                 | -----              | -----   | -----   | -----   |
| Total Bonding Energy:           | -0.245377429941708 | -6.6771 | -153.98 | -644.24 |

F R A G M E N T E N E R G Y T E R M S \*\*\* (summed over all fragments) \*\*\*

The energy terms below are (parts of) the Total Energy of the fragments from which the molecule is built.

## Exchange and Correlation

|                  |                    |          |         |          |
|------------------|--------------------|----------|---------|----------|
| Exchange LDA:    | -0.396722097371877 | -10.7954 | -248.95 | -1041.59 |
| Exchange GGA:    | -0.087472208659961 | -2.3802  | -54.89  | -229.66  |
| Correlation LDA: | -0.079840340638723 | -2.1726  | -50.10  | -209.62  |
| Correlation GGA: | 0.047665891697241  | 1.2971   | 29.91   | 125.15   |
|                  | -----              | -----    | -----   | -----    |
| Total XC:        | -0.516368754973320 | -14.0511 | -324.03 | -1355.73 |

## Intensities

=====

| Frequency<br>cm-1 | Dipole Strength<br>1e-40 esu2 cm2 | Absorption Intensity (degeneracy not counted)<br>km/mole |
|-------------------|-----------------------------------|----------------------------------------------------------|
| -----             | -----                             | -----                                                    |
| 4282.634665       | 0.000000                          | 0.000000                                                 |

Zero-Point Energy : 0.009757 a.u.  
 ===== 0.265490 eV



S1

Geometry CYCLE 19

=====

Energy gradients wrt nuclear displacements

=====

| Atom  | Cartesian (a.u./angstrom) |           |           |
|-------|---------------------------|-----------|-----------|
|       | X                         | Y         | Z         |
| 1 C   | -0.000010                 | 0.000032  | -0.000086 |
| 2 H   | -0.000030                 | -0.000043 | 0.000019  |
| 3 C   | -0.000160                 | 0.000073  | -0.000175 |
| 4 C   | -0.000031                 | 0.000024  | 0.000125  |
| 5 Cl  | -0.000339                 | 0.000122  | -0.000144 |
| 6 N   | 0.000453                  | -0.000032 | 0.000103  |
| 7 O   | 0.000072                  | 0.000282  | -0.000002 |
| 8 C   | -0.000077                 | -0.000082 | 0.000031  |
| 9 O   | -0.000001                 | -0.000060 | 0.000014  |
| 10 H  | -0.000012                 | 0.000009  | -0.000012 |
| 11 C  | 0.000462                  | -0.000210 | -0.000174 |
| 12 C  | -0.000235                 | -0.000177 | -0.000071 |
| 13 C  | 0.000146                  | 0.000220  | -0.000179 |
| 14 Ru | -0.000168                 | -0.000108 | -0.000012 |
| 15 H  | -0.000036                 | 0.000007  | 0.000031  |
| 16 Ru | 0.000382                  | -0.000315 | -0.000146 |
| 17 C  | -0.000063                 | -0.000052 | 0.000070  |
| 18 C  | 0.000056                  | 0.000078  | 0.000175  |
| 19 C  | -0.000056                 | -0.000149 | -0.000147 |
| 20 C  | -0.000041                 | -0.000069 | 0.000027  |
| 21 H  | -0.000031                 | 0.000002  | 0.000050  |
| 22 H  | -0.000023                 | 0.000025  | 0.000013  |
| 23 C  | -0.000008                 | 0.000043  | -0.000017 |
| 24 O  | 0.000103                  | -0.000038 | -0.000141 |
| 25 N  | -0.000222                 | 0.000191  | 0.000101  |
| 26 H  | -0.000027                 | 0.000052  | -0.000040 |
| 27 C  | 0.000053                  | -0.000006 | 0.000049  |
| 28 C  | 0.000102                  | 0.000114  | 0.000003  |
| 29 H  | -0.000008                 | 0.000009  | -0.000026 |
| 30 C  | -0.000191                 | -0.000103 | 0.000144  |
| 31 C  | -0.000033                 | 0.000013  | 0.000041  |
| 32 C  | -0.000123                 | -0.000021 | -0.000040 |
| 33 C  | 0.000033                  | -0.000017 | 0.000028  |
| 34 H  | 0.000000                  | -0.000001 | 0.000029  |
| 35 C  | 0.000083                  | 0.000080  | 0.000069  |
| 36 C  | -0.000011                 | 0.000012  | 0.000040  |
| 37 H  | 0.000018                  | 0.000010  | 0.000039  |
| 38 C  | 0.000059                  | 0.000164  | -0.000038 |
| 39 C  | 0.000009                  | -0.000009 | 0.000038  |
| 40 C  | -0.000069                 | 0.000005  | 0.000069  |
| 41 H  | -0.000009                 | -0.000019 | 0.000018  |
| 42 H  | 0.000020                  | 0.000015  | 0.000023  |
| 43 C  | -0.000067                 | -0.000036 | -0.000011 |
| 44 H  | 0.000035                  | 0.000033  | -0.000056 |
| 45 C  | 0.000042                  | -0.000003 | -0.000036 |
| 46 H  | -0.000036                 | 0.000013  | 0.000072  |
| 47 H  | -0.000035                 | -0.000006 | 0.000016  |
| 48 H  | -0.000040                 | -0.000047 | -0.000006 |
| 49 H  | -0.000018                 | -0.000041 | -0.000008 |
| 50 Cl | 0.000131                  | -0.000163 | -0.000119 |
| 51 C  | 0.000007                  | 0.000394  | 0.000118  |
| 52 O  | -0.000055                 | -0.000216 | 0.000131  |

-----  
 Geometry Convergence after Step 19

|                          |                      |            |   |
|--------------------------|----------------------|------------|---|
| current energy           | -13.14710742 Hartree |            |   |
| abs of energy change     | 0.00011518           | 0.00100000 | T |
| constrained gradient max | 0.00046214           | 0.00100000 | T |
| constrained gradient rms | 0.00011617           | 0.00066667 | T |
| gradient max             | 0.00046214           |            |   |
| gradient rms             | 0.00011617           |            |   |
| cart. step max           | 0.00798654           | 0.01000000 | T |
| cart. step rms           | 0.00253911           | 0.00666667 | T |

|                      | hartree             | eV        | kcal/mol | kJ/mol    |
|----------------------|---------------------|-----------|----------|-----------|
|                      | -----               | -----     | -----    | -----     |
| Pauli Repulsion      |                     |           |          |           |
| Kinetic (Delta T^0): | 153.657393021075791 | 4181.2304 | 96421.48 | 403427.43 |

Electronic Supplementary Information for Dalton Transactions  
 This journal is © The Royal Society of Chemistry 2010

|                                                                                        |                      |            |           |            |
|----------------------------------------------------------------------------------------|----------------------|------------|-----------|------------|
| Delta V <sup>Pauli</sup> Coulomb:                                                      | -80.212982627452675  | -2182.7063 | -50334.41 | -210599.16 |
| Delta V <sup>Pauli</sup> LDA-XC:                                                       | -18.943905522961973  | -515.4899  | -11887.48 | -49737.22  |
| Delta V <sup>Pauli</sup> GGA-Exchange:                                                 | 1.109374169956176    | 30.1876    | 696.14    | 2912.66    |
| Delta V <sup>Pauli</sup> GGA-Correlation:                                              | -0.312653784333063   | -8.5077    | -196.19   | -820.87    |
| -----                                                                                  |                      |            |           |            |
| Total Pauli Repulsion:                                                                 | 55.297225256284257   | 1504.7141  | 34699.54  | 145182.84  |
| (Total Pauli Repulsion =<br>Delta E <sup>Pauli</sup> in BB paper)                      |                      |            |           |            |
| Steric Interaction                                                                     |                      |            |           |            |
| Pauli Repulsion (Delta E <sup>Pauli</sup> ):                                           | 55.297225256284257   | 1504.7141  | 34699.54  | 145182.84  |
| Electrostatic Interaction:                                                             | -11.803180345373027  | -321.1809  | -7406.61  | -30989.25  |
| (Electrostatic Interaction =<br>Delta V <sub>elstat</sub> in the BB paper)             |                      |            |           |            |
| -----                                                                                  |                      |            |           |            |
| Total Steric Interaction:                                                              | 43.494044910911228   | 1183.5332  | 27292.93  | 114193.60  |
| (Total Steric Interaction =<br>Delta E <sup>0</sup> in the BB paper)                   |                      |            |           |            |
| Orbital Interactions                                                                   |                      |            |           |            |
| A:                                                                                     | -56.500491336221586  | -1537.4566 | -35454.60 | -148342.02 |
| -----                                                                                  |                      |            |           |            |
| Total Orbital Interactions:                                                            | -56.507528169396551  | -1537.6481 | -35459.01 | -148360.49 |
| Alternative Decomposition Orb.Int.                                                     |                      |            |           |            |
| Kinetic:                                                                               | -141.290918202773526 | -3844.7215 | -88661.40 | -370959.25 |
| Coulomb:                                                                               | 78.075238519674713   | 2124.5353  | 48992.96  | 204986.51  |
| XC:                                                                                    | 6.708151513702091    | 182.5381   | 4209.43   | 17612.25   |
| -----                                                                                  |                      |            |           |            |
| Total Orbital Interactions:                                                            | -56.507528169396721  | -1537.6481 | -35459.01 | -148360.49 |
| Residu (E=Steric+OrbInt+Res):                                                          | -0.000011802390465   | -0.0003    | -0.01     | -0.03      |
| Solvation Energy (el):                                                                 | -0.032582984434513   | -0.8866    | -20.45    | -85.55     |
| Dispersion Energy:                                                                     | -0.107159425122269   | -2.9160    | -67.24    | -281.35    |
| Post-SCF Solvation Energies                                                            |                      |            |           |            |
| Solvation Energy (cd):                                                                 | 0.006126897640164    | 0.1667     | 3.84      | 16.09      |
| Total Bonding Energy:                                                                  | -13.147110572792405  | -357.7511  | -8249.94  | -34517.73  |
| Summary of Bonding Energy (energy terms are taken from the energy decomposition above) |                      |            |           |            |
| =====                                                                                  |                      |            |           |            |
| Electrostatic Energy:                                                                  | -11.803180345373027  | -321.1809  | -7406.61  | -30989.25  |
| Kinetic Energy:                                                                        | 12.366474818302265   | 336.5089   | 7760.08   | 32468.18   |
| Coulomb (Steric+OrbInt) Energy:                                                        | -2.137755910168423   | -58.1713   | -1341.46  | -5612.68   |
| XC Energy:                                                                             | -11.439033623636773  | -311.2719  | -7178.10  | -30033.18  |
| Solvation:                                                                             | -0.026456086794349   | -0.7199    | -16.60    | -69.46     |
| Dispersion Energy:                                                                     | -0.107159425122269   | -2.9160    | -67.24    | -281.35    |
| -----                                                                                  |                      |            |           |            |
| Total Bonding Energy:                                                                  | -13.147110572792576  | -357.7511  | -8249.94  | -34517.73  |

FRAGMENT ENERGY TERMS \*\*\* (summed over all fragments) \*\*\*

The energy terms below are (parts of) the Total Energy of the fragments from which the molecule is built.

|                          |                      |             |            |             |
|--------------------------|----------------------|-------------|------------|-------------|
| Exchange and Correlation |                      |             |            |             |
| Exchange LDA:            | -459.234117614289175 | -12496.3962 | -288173.79 | -1205719.01 |
| Exchange GGA:            | -38.707704673560812  | -1053.2902  | -24289.45  | -101627.06  |
| Correlation LDA:         | -24.378241141102887  | -663.3657   | -15297.58  | -64005.06   |
| Correlation GGA:         | 11.324523941743802   | 308.1560    | 7106.25    | 29732.53    |
| -----                    |                      |             |            |             |
| Total XC:                | -510.995539487209044 | -13904.8961 | -320654.58 | -1341618.60 |

Intensities  
 =====

| Frequency<br>cm-1 | Dipole Strength<br>1e-40 esu <sup>2</sup> cm <sup>2</sup> | Absorption Intensity (degeneracy not counted)<br>km/mole |
|-------------------|-----------------------------------------------------------|----------------------------------------------------------|
| -----             | -----                                                     | -----                                                    |
| 15.454937         | 753.513643                                                | 2.919016                                                 |
| 21.837753         | 665.719027                                                | 3.643988                                                 |
| 38.031836         | 1.971337                                                  | 0.018793                                                 |
| 40.566705         | 59.937131                                                 | 0.609458                                                 |
| 55.597403         | 11.877243                                                 | 0.165519                                                 |
| 61.652152         | 96.870711                                                 | 1.496990                                                 |
| 66.389933         | 13.522584                                                 | 0.225030                                                 |
| 68.528028         | 29.192494                                                 | 0.501438                                                 |

Electronic Supplementary Information for Dalton Transactions  
This journal is © The Royal Society of Chemistry 2010

|             |             |            |
|-------------|-------------|------------|
| 74.057476   | 317.894303  | 5.901056   |
| 82.102517   | 26.560877   | 0.546609   |
| 86.637164   | 1.744560    | 0.037885   |
| 87.648310   | 17.932957   | 0.393979   |
| 93.929965   | 0.208810    | 0.004916   |
| 102.659947  | 34.340815   | 0.883669   |
| 104.580411  | 0.254069    | 0.006660   |
| 111.130978  | 13.176192   | 0.367031   |
| 121.599725  | 0.451459    | 0.013760   |
| 136.901749  | 0.511434    | 0.017550   |
| 149.718935  | 105.658871  | 3.965160   |
| 180.569081  | 200.046631  | 9.054255   |
| 195.268664  | 1.891219    | 0.092566   |
| 197.535184  | 23.809109   | 1.178869   |
| 200.063759  | 1.679639    | 0.084229   |
| 211.333795  | 583.248530  | 30.895887  |
| 215.798289  | 1.704896    | 0.092220   |
| 250.802759  | 116.799475  | 7.342624   |
| 252.189135  | 31.304898   | 1.978868   |
| 257.568516  | 0.389300    | 0.025134   |
| 262.475437  | 131.831922  | 8.673359   |
| 265.988512  | 0.448426    | 0.029897   |
| 277.736630  | 1288.129860 | 89.674896  |
| 289.149732  | 10.684894   | 0.774410   |
| 290.555664  | 77.212583   | 5.623355   |
| 369.240141  | 0.145478    | 0.013464   |
| 370.639828  | 74.112317   | 6.885263   |
| 409.251563  | 296.706608  | 30.436565  |
| 410.920198  | 4.609468    | 0.474773   |
| 420.102406  | 6.565389    | 0.691343   |
| 420.433418  | 2.548024    | 0.268521   |
| 463.202108  | 1.025983    | 0.119121   |
| 463.825901  | 32.949251   | 3.830704   |
| 466.591825  | 9.276763    | 1.084955   |
| 467.023872  | 38.545111   | 4.512180   |
| 484.609643  | 5.968242    | 0.724964   |
| 484.786035  | 11.986518   | 1.456536   |
| 509.579028  | 0.857311    | 0.109504   |
| 511.301028  | 149.212032  | 19.123113  |
| 517.038458  | 43.693508   | 5.662625   |
| 518.127921  | 279.298632  | 36.273033  |
| 540.697460  | 6.348752    | 0.860440   |
| 541.178772  | 101.345956  | 13.747548  |
| 553.443108  | 17.984917   | 2.494936   |
| 554.634664  | 0.237742    | 0.033052   |
| 589.046283  | 208.923224  | 30.847091  |
| 589.311212  | 268.035406  | 39.592684  |
| 620.371612  | 33.526172   | 5.213315   |
| 621.140388  | 99.234196   | 15.450025  |
| 630.795650  | 549.739701  | 86.920829  |
| 631.853807  | 6.910013    | 1.094394   |
| 640.356854  | 42.487913   | 6.819704   |
| 640.837501  | 25.558565   | 4.105466   |
| 656.105792  | 7.824572    | 1.286804   |
| 656.740775  | 33.554429   | 5.523596   |
| 712.229325  | 174.847633  | 31.214593  |
| 713.239712  | 0.624364    | 0.111622   |
| 719.575145  | 760.632333  | 137.192069 |
| 720.080177  | 47.364400   | 8.548914   |
| 736.074396  | 1490.717158 | 275.039476 |
| 737.118357  | 2.658374    | 0.491169   |
| 750.504069  | 0.919804    | 0.173032   |
| 750.803822  | 10.967827   | 2.064073   |
| 778.955768  | 31.751601   | 6.199498   |
| 779.457180  | 16.447462   | 3.213433   |
| 841.609901  | 4.337700    | 0.915058   |
| 842.166418  | 0.887598    | 0.187367   |
| 863.991370  | 17.031832   | 3.688492   |
| 864.589582  | 5.916523    | 1.282197   |
| 921.955579  | 7.104819    | 1.641879   |
| 922.485563  | 3.337303    | 0.771673   |
| 956.569882  | 40.093811   | 9.613292   |
| 957.366136  | 0.579052    | 0.138955   |
| 959.285795  | 3.856303    | 0.927251   |
| 961.042824  | 0.406897    | 0.098018   |
| 976.018794  | 0.915125    | 0.223881   |
| 977.376226  | 1.913676    | 0.468822   |
| 994.385385  | 11.673210   | 2.909532   |
| 994.624963  | 14.012749   | 3.493500   |
| 1001.212170 | 12.060229   | 3.026633   |
| 1001.503832 | 364.587352  | 91.523429  |
| 1012.098515 | 6.342130    | 1.608926   |
| 1012.404647 | 16.751856   | 4.251039   |
| 1041.249303 | 5.803453    | 1.514674   |
| 1041.674563 | 3.729273    | 0.973720   |

|             |             |             |
|-------------|-------------|-------------|
| 1045.778867 | 195.336422  | 51.203678   |
| 1046.424697 | 39.114425   | 10.259425   |
| 1087.360895 | 18.976148   | 5.172016    |
| 1087.993710 | 18.244183   | 4.975410    |
| 1097.411913 | 17.916376   | 4.928309    |
| 1098.679045 | 11.720843   | 3.227808    |
| 1119.283802 | 3.511396    | 0.985140    |
| 1120.194549 | 49.093475   | 13.784636   |
| 1136.483536 | 37.491737   | 10.680136   |
| 1138.341046 | 41.920000   | 11.961117   |
| 1233.857858 | 35.226919   | 10.894765   |
| 1234.300619 | 66.077481   | 20.443370   |
| 1264.110829 | 157.481623  | 49.899145   |
| 1264.845706 | 12.145168   | 3.850518    |
| 1281.254936 | 28.327825   | 9.097600    |
| 1281.588965 | 14.142033   | 4.542957    |
| 1299.095592 | 71.597057   | 23.313869   |
| 1299.395628 | 42.602818   | 13.875793   |
| 1310.296759 | 24.185527   | 7.943342    |
| 1310.391295 | 139.988459  | 45.980247   |
| 1401.383350 | 10.164849   | 3.570557    |
| 1401.575396 | 290.060906  | 101.902241  |
| 1415.676633 | 16.768827   | 5.950382    |
| 1415.946244 | 140.011471  | 49.692226   |
| 1436.942566 | 0.686111    | 0.247122    |
| 1437.348158 | 35.487950   | 12.785596   |
| 1463.062083 | 34.294078   | 12.576505   |
| 1463.608409 | 741.609100  | 272.068346  |
| 1531.819171 | 25.232885   | 9.688409    |
| 1532.227112 | 58.745725   | 22.561994   |
| 1546.017600 | 162.939863  | 63.142220   |
| 1546.371752 | 112.535537  | 43.619599   |
| 1562.334658 | 305.922002  | 119.801664  |
| 1562.621593 | 47.320513   | 18.534520   |
| 1588.718931 | 219.273542  | 87.319527   |
| 1589.020792 | 294.762401  | 117.403146  |
| 1910.157241 | 0.875193    | 0.419036    |
| 1910.529296 | 5939.965097 | 2844.563708 |
| 1982.813262 | 5268.646276 | 2618.538281 |
| 1990.468491 | 0.577814    | 0.288285    |
| 3081.164563 | 0.025480    | 0.019679    |
| 3088.118139 | 0.765846    | 0.592807    |
| 3096.231384 | 0.495705    | 0.384711    |
| 3096.528761 | 0.088812    | 0.068933    |
| 3100.552907 | 0.794664    | 0.617591    |
| 3102.070521 | 36.367537   | 28.277671   |
| 3103.886199 | 1.485177    | 1.155479    |
| 3108.261516 | 10.167452   | 7.921506    |
| 3112.456221 | 2.888874    | 2.253772    |
| 3114.128944 | 70.381527   | 54.938064   |
| 3117.807353 | 35.699319   | 27.898913   |
| 3117.951639 | 12.192262   | 9.528658    |
| 3130.162269 | 3.474289    | 2.725906    |
| 3131.526740 | 3.812822    | 2.992821    |
| 3137.210923 | 2.031904    | 1.597810    |
| 3138.552222 | 3.020850    | 2.376493    |

Zero-Point Energy : 0.347155 a.u.  
===== 9.446557 eV

A1

Geometry CYCLE 67

=====

Energy gradients wrt nuclear displacements

=====

| Atom  | Cartesian (a.u./angstrom) |           |           |
|-------|---------------------------|-----------|-----------|
|       | X                         | Y         | Z         |
| 1 O   | 0.000133                  | -0.000036 | -0.000012 |
| 2 O   | 0.000013                  | -0.000011 | 0.000009  |
| 3 C   | -0.000299                 | 0.000063  | 0.000048  |
| 4 C   | -0.000192                 | 0.000010  | 0.000183  |
| 5 H   | 0.000086                  | -0.000065 | -0.000048 |
| 6 Ru  | 0.000382                  | -0.000015 | -0.000548 |
| 7 C   | -0.000012                 | 0.000100  | 0.000049  |
| 8 H   | 0.000024                  | 0.000008  | 0.000020  |
| 9 N   | -0.000248                 | 0.000043  | 0.000124  |
| 10 H  | -0.000010                 | 0.000041  | 0.000001  |
| 11 C  | -0.000041                 | 0.000029  | 0.000074  |
| 12 C  | -0.000032                 | -0.000007 | 0.000027  |
| 13 C  | -0.000070                 | 0.000094  | 0.000065  |
| 14 C  | 0.000167                  | -0.000026 | -0.000033 |
| 15 C  | 0.000055                  | -0.000031 | -0.000038 |
| 16 C  | 0.000056                  | 0.000052  | -0.000102 |
| 17 C  | -0.000181                 | 0.000013  | -0.000026 |
| 18 C  | 0.000080                  | -0.000108 | -0.000071 |
| 19 H  | -0.000009                 | -0.000039 | -0.000018 |
| 20 H  | 0.000013                  | -0.000017 | -0.000016 |
| 21 C  | 0.000073                  | -0.000094 | 0.000048  |
| 22 H  | -0.000023                 | 0.000030  | -0.000003 |
| 23 C  | -0.000052                 | 0.000031  | 0.000009  |
| 24 H  | 0.000038                  | 0.000016  | 0.000010  |
| 25 H  | -0.000001                 | 0.000051  | 0.000037  |
| 26 Cl | 0.000118                  | -0.000201 | 0.000195  |
| 27 N  | -0.000337                 | -0.000058 | -0.000474 |
| 28 H  | 0.000208                  | 0.000145  | 0.000095  |
| 29 H  | 0.000013                  | -0.000133 | 0.000042  |
| 30 H  | -0.000111                 | 0.000073  | 0.000115  |
| 31 B  | 0.000492                  | 0.000005  | 0.000252  |
| 32 H  | -0.000042                 | 0.000008  | -0.000042 |
| 33 H  | -0.000195                 | 0.000022  | -0.000016 |
| 34 H  | -0.000096                 | 0.000009  | 0.000042  |

-----  
 Geometry Convergence after Step 67

|                          |            |                     |   |  |
|--------------------------|------------|---------------------|---|--|
| current energy           |            | -7.93754718 Hartree |   |  |
| abs of energy change     | 0.00000387 | 0.00100000          | T |  |
| constrained gradient max | 0.00054788 | 0.00100000          | T |  |
| constrained gradient rms | 0.00013366 | 0.00066667          | T |  |
| gradient max             | 0.00054788 |                     |   |  |
| gradient rms             | 0.00013366 |                     |   |  |
| cart. step max           | 0.00659538 | 0.01000000          | T |  |
| cart. step rms           | 0.00195614 | 0.00666667          | T |  |

|                                                                 | hartree             | eV         | kcal/mol  | kJ/mol     |
|-----------------------------------------------------------------|---------------------|------------|-----------|------------|
| Pauli Repulsion                                                 |                     |            |           |            |
| Kinetic (Delta T^0):                                            | 86.946612620765634  | 2365.9377  | 54559.83  | 228278.30  |
| Delta V^Pauli Coulomb:                                          | -44.634942764996289 | -1214.5786 | -28008.85 | -117189.03 |
| Delta V^Pauli LDA-XC:                                           | -10.924500017280753 | -297.2708  | -6855.23  | -28682.27  |
| Delta V^Pauli GGA-Exchange:                                     | 0.618826292214109   | 16.8391    | 388.32    | 1624.73    |
| Delta V^Pauli GGA-Correlation:                                  | -0.171930428459481  | -4.6785    | -107.89   | -451.40    |
| Total Pauli Repulsion:                                          | 31.834065702243223  | 866.2490   | 19976.18  | 83580.33   |
| (Total Pauli Repulsion =<br>Delta E^Pauli in BB paper)          |                     |            |           |            |
| Steric Interaction                                              |                     |            |           |            |
| Pauli Repulsion (Delta E^Pauli):                                | 31.834065702243223  | 866.2490   | 19976.18  | 83580.33   |
| Electrostatic Interaction:                                      | -6.636085748858866  | -180.5771  | -4164.21  | -17423.04  |
| (Electrostatic Interaction =<br>Delta V_elstat in the BB paper) |                     |            |           |            |
| Total Steric Interaction:                                       | 25.197979953384355  | 685.6719   | 15811.97  | 66157.29   |
| (Total Steric Interaction =                                     |                     |            |           |            |

Delta E<sup>0</sup> in the BB paper)

|                                    |                     |            |           |            |
|------------------------------------|---------------------|------------|-----------|------------|
| Orbital Interactions               |                     |            |           |            |
| A:                                 | -33.040071439139588 | -899.0661  | -20732.96 | -86746.70  |
|                                    | -----               | -----      | -----     | -----      |
| Total Orbital Interactions:        | -33.042886374670374 | -899.1427  | -20734.73 | -86754.09  |
| Alternative Decomposition Orb.Int. |                     |            |           |            |
| Kinetic:                           | -79.507900780156518 | -2163.5201 | -49891.97 | -208747.96 |
| Coulomb:                           | 42.883197942332835  | 1166.9112  | 26909.62  | 112589.82  |
| XC:                                | 3.581816463153244   | 97.4662    | 2247.62   | 9404.06    |
|                                    | -----               | -----      | -----     | -----      |
| Total Orbital Interactions:        | -33.042886374670438 | -899.1427  | -20734.73 | -86754.09  |
| Residu (E=Steric+OrbInt+Res):      | -0.000001735724702  | 0.0000     | 0.00      | 0.00       |
| Solvation Energy (el):             | -0.033077701161116  | -0.9001    | -20.76    | -86.85     |
| Dispersion Energy:                 | -0.064211111814565  | -1.7473    | -40.29    | -168.59    |
| Post-SCF Solvation Energies        |                     |            |           |            |
| Solvation Energy (cd):             | 0.004650058957698   | 0.1265     | 2.92      | 12.21      |
| Total Bonding Energy:              | -7.937546911028705  | -215.9916  | -4980.89  | -20840.03  |

Summary of Bonding Energy (energy terms are taken from the energy decomposition above)

|                                 |                    |           |          |           |
|---------------------------------|--------------------|-----------|----------|-----------|
| Electrostatic Energy:           | -6.636085748858866 | -180.5771 | -4164.21 | -17423.04 |
| Kinetic Energy:                 | 7.438711840609116  | 202.4176  | 4667.86  | 19530.34  |
| Coulomb (Steric+OrbInt) Energy: | -1.751746558388156 | -47.6674  | -1099.24 | -4599.21  |
| XC Energy:                      | -6.895787690372881 | -187.6439 | -4327.17 | -18104.89 |
| Solvation:                      | -0.028427642203418 | -0.7736   | -17.84   | -74.64    |
| Dispersion Energy:              | -0.064211111814565 | -1.7473   | -40.29   | -168.59   |
|                                 | -----              | -----     | -----    | -----     |
| Total Bonding Energy:           | -7.937546911028770 | -215.9916 | -4980.89 | -20840.03 |

F R A G M E N T E N E R G Y T E R M S \*\*\* (summed over all fragments) \*\*\*

The energy terms below are (parts of) the Total Energy of the fragments from which the molecule is built.

|                          |                      |            |            |            |
|--------------------------|----------------------|------------|------------|------------|
| Exchange and Correlation |                      |            |            |            |
| Exchange LDA:            | -239.772788141621220 | -6524.5495 | -150459.71 | -629523.37 |
| Exchange GGA:            | -20.772112115001235  | -565.2379  | -13034.70  | -54537.17  |
| Correlation LDA:         | -13.181972010595377  | -358.6997  | -8271.81   | -34609.26  |
| Correlation GGA:         | 6.202763018649623    | 168.7858   | 3892.29    | 16285.35   |
|                          | -----                | -----      | -----      | -----      |
| Total XC:                | -267.524109248568152 | -7279.7014 | -167873.93 | -702384.45 |

Intensities

=====

| Frequency<br>cm-1 | Dipole Strength<br>1e-40 esu <sup>2</sup> cm <sup>2</sup> | Absorption Intensity (degeneracy not counted)<br>km/mole |
|-------------------|-----------------------------------------------------------|----------------------------------------------------------|
| -----             | -----                                                     | -----                                                    |
| 33.191872         | 1201.591098                                               | 9.996927                                                 |
| 36.488797         | 271.387747                                                | 2.482149                                                 |
| 62.865563         | 141.696263                                                | 2.232797                                                 |
| 74.874090         | 458.051597                                                | 8.596547                                                 |
| 83.783660         | 88.004561                                                 | 1.848173                                                 |
| 85.651933         | 15.904809                                                 | 0.341463                                                 |
| 90.176876         | 39.699682                                                 | 0.897347                                                 |
| 98.253943         | 337.214908                                                | 8.304908                                                 |
| 110.613109        | 521.972579                                                | 14.472127                                                |
| 125.773556        | 48.200794                                                 | 1.519573                                                 |
| 139.282173        | 571.077565                                                | 19.937408                                                |
| 162.494576        | 305.064237                                                | 12.425339                                                |
| 190.784899        | 395.852846                                                | 18.930228                                                |
| 195.588982        | 172.777154                                                | 8.470495                                                 |
| 202.849720        | 129.899580                                                | 6.604808                                                 |
| 221.632242        | 724.274331                                                | 40.235936                                                |
| 241.458991        | 699.943169                                                | 42.362758                                                |
| 263.182288        | 58.666649                                                 | 3.870134                                                 |
| 268.032547        | 294.531658                                                | 19.787803                                                |
| 291.961083        | 122.297253                                                | 8.949932                                                 |
| 369.722092        | 68.631783                                                 | 6.360317                                                 |
| 410.355216        | 164.088743                                                | 16.877838                                                |
| 418.528235        | 5.894119                                                  | 0.618332                                                 |
| 453.180771        | 217.840130                                                | 24.744998                                                |
| 466.209301        | 15.806758                                                 | 1.847148                                                 |

|             |             |             |
|-------------|-------------|-------------|
| 469.795132  | 21.903877   | 2.579334    |
| 493.507952  | 86.463186   | 10.695558   |
| 509.976112  | 174.516278  | 22.308165   |
| 514.791037  | 55.768527   | 7.196117    |
| 546.438121  | 98.349414   | 13.470721   |
| 554.417440  | 27.971071   | 3.887085    |
| 592.051135  | 267.669629  | 39.722483   |
| 620.097614  | 61.053329   | 9.489591    |
| 626.585963  | 397.118050  | 62.370376   |
| 639.328666  | 27.201420   | 4.359070    |
| 656.137387  | 20.609946   | 3.389610    |
| 709.856821  | 112.092276  | 19.944563   |
| 715.634500  | 106.185386  | 19.047329   |
| 721.284408  | 337.740032  | 61.061456   |
| 736.795371  | 790.886498  | 146.062631  |
| 750.295144  | 2.193581    | 0.412538    |
| 762.250411  | 52.661003   | 10.061549   |
| 779.880288  | 21.267149   | 4.157337    |
| 800.341975  | 103.232048  | 20.709433   |
| 842.052713  | 4.640063    | 0.979357    |
| 862.788877  | 1.065592    | 0.230448    |
| 921.574719  | 4.411892    | 1.019139    |
| 946.704031  | 160.439935  | 38.071920   |
| 956.830278  | 11.757236   | 2.819799    |
| 960.552502  | 1.165147    | 0.280530    |
| 974.976578  | 2.473776    | 0.604550    |
| 992.699401  | 27.509506   | 6.845081    |
| 1002.234192 | 175.007873  | 43.964777   |
| 1010.934553 | 29.463073   | 7.465848    |
| 1017.172736 | 694.938319  | 177.181772  |
| 1038.276004 | 6.080297    | 1.582398    |
| 1044.683750 | 137.489724  | 36.002541   |
| 1049.872931 | 307.575708  | 80.940678   |
| 1085.391093 | 4.653270    | 1.265968    |
| 1097.373032 | 15.708581   | 4.320851    |
| 1118.776494 | 24.396070   | 6.841342    |
| 1136.441929 | 33.398617   | 9.513795    |
| 1160.362327 | 146.909429  | 42.728865   |
| 1196.737960 | 384.404857  | 115.309743  |
| 1233.293563 | 74.412358   | 23.003271   |
| 1260.146196 | 89.145682   | 28.157839   |
| 1278.751823 | 27.407240   | 8.784755    |
| 1299.300813 | 80.779047   | 26.307920   |
| 1312.592532 | 110.757532  | 36.440243   |
| 1357.006916 | 556.613713  | 189.327645  |
| 1399.296585 | 167.738837  | 58.833065   |
| 1415.465768 | 64.779960   | 22.983603   |
| 1434.321358 | 11.742866   | 4.221810    |
| 1460.965821 | 534.908368  | 195.883348  |
| 1529.650742 | 67.844348   | 26.012616   |
| 1542.656474 | 119.198756  | 46.091306   |
| 1552.439004 | 85.514007   | 33.275905   |
| 1563.566549 | 214.498884  | 84.065825   |
| 1586.791818 | 272.645565  | 108.441736  |
| 1592.353640 | 239.255144  | 95.494614   |
| 1909.523992 | 2772.995405 | 1327.248794 |
| 1985.661806 | 2490.725097 | 1239.678728 |
| 2152.335862 | 2889.739638 | 1559.002556 |
| 2450.594313 | 309.985795  | 190.410671  |
| 2522.437575 | 295.678517  | 186.946900  |
| 3031.251374 | 858.972740  | 652.648591  |
| 3082.827569 | 1.882378    | 1.454569    |
| 3092.481866 | 1.024729    | 0.794318    |
| 3099.257684 | 28.707681   | 22.301489   |
| 3105.023800 | 54.431296   | 42.363485   |
| 3108.401107 | 0.707501    | 0.551242    |
| 3113.339232 | 28.936115   | 22.581081   |
| 3128.105260 | 4.934742    | 3.869224    |
| 3138.457223 | 0.629030    | 0.494841    |
| 3379.632404 | 94.551492   | 80.096940   |
| 3445.365008 | 166.079726  | 143.426674  |

Zero-Point Energy : 0.242115 a.u.  
===== 6.588280 eV

A2

Geometry CYCLE 17  
 =====

Energy gradients wrt nuclear displacements  
 =====

| Atom  | Cartesian (a.u./angstrom) |           |           |
|-------|---------------------------|-----------|-----------|
|       | X                         | Y         | Z         |
| 1 O   | 0.000157                  | 0.000001  | -0.000034 |
| 2 O   | -0.000053                 | -0.000035 | 0.000070  |
| 3 C   | -0.000064                 | 0.000036  | 0.000060  |
| 4 C   | -0.000078                 | -0.000368 | -0.000088 |
| 5 H   | 0.000003                  | -0.000001 | 0.000001  |
| 6 Ru  | -0.000112                 | 0.000244  | 0.000030  |
| 7 C   | 0.000039                  | 0.000054  | 0.000020  |
| 8 H   | 0.000002                  | 0.000010  | 0.000014  |
| 9 N   | -0.000003                 | 0.000005  | 0.000041  |
| 10 H  | 0.000016                  | 0.000020  | -0.000014 |
| 11 C  | -0.000027                 | 0.000026  | 0.000048  |
| 12 C  | 0.000027                  | -0.000054 | -0.000010 |
| 13 C  | 0.000025                  | 0.000021  | -0.000009 |
| 14 C  | -0.000009                 | -0.000047 | -0.000033 |
| 15 C  | -0.000007                 | -0.000002 | -0.000027 |
| 16 C  | -0.000011                 | 0.000064  | 0.000029  |
| 17 C  | 0.000021                  | 0.000002  | 0.000014  |
| 18 C  | 0.000002                  | -0.000012 | -0.000010 |
| 19 H  | -0.000007                 | -0.000003 | -0.000012 |
| 20 H  | -0.000009                 | 0.000014  | 0.000010  |
| 21 C  | -0.000026                 | 0.000005  | -0.000044 |
| 22 H  | -0.000001                 | -0.000002 | 0.000002  |
| 23 C  | 0.000026                  | 0.000014  | 0.000001  |
| 24 H  | -0.000007                 | 0.000003  | -0.000013 |
| 25 H  | 0.000007                  | -0.000004 | 0.000004  |
| 26 Cl | 0.000091                  | 0.000065  | -0.000092 |
| 27 N  | 0.000149                  | 0.000067  | -0.000032 |
| 28 H  | 0.000002                  | 0.000004  | 0.000047  |
| 29 H  | -0.000053                 | 0.000057  | 0.000028  |
| 30 H  | -0.000054                 | -0.000111 | 0.000011  |
| 31 B  | -0.000119                 | -0.000211 | 0.000101  |
| 32 H  | 0.000026                  | 0.000007  | 0.000025  |
| 33 H  | 0.000045                  | 0.000106  | -0.000130 |
| 34 H  | 0.000001                  | 0.000025  | -0.000008 |

-----  
 Geometry Convergence after Step 17  
 -----

|                          |            |                     |   |  |
|--------------------------|------------|---------------------|---|--|
| current energy           |            | -7.92974513 Hartree |   |  |
| abs of energy change     | 0.00000254 | 0.00100000          | T |  |
| constrained gradient max | 0.00036762 | 0.00100000          | T |  |
| constrained gradient rms | 0.00006799 | 0.00066667          | T |  |
| gradient max             | 0.00036762 |                     |   |  |
| gradient rms             | 0.00006799 |                     |   |  |
| cart. step max           | 0.00477522 | 0.01000000          | T |  |
| cart. step rms           | 0.00109058 | 0.00666667          | T |  |

|                                                                 | hartree             | eV         | kcal/mol  | kJ/mol     |
|-----------------------------------------------------------------|---------------------|------------|-----------|------------|
| -----                                                           |                     |            |           |            |
| Pauli Repulsion                                                 |                     |            |           |            |
| Kinetic (Delta T^0):                                            | 86.661777654206318  | 2358.1870  | 54381.09  | 227530.47  |
| Delta V^Pauli Coulomb:                                          | -44.428764747686365 | -1208.9682 | -27879.47 | -116647.71 |
| Delta V^Pauli LDA-XC:                                           | -10.888131703046760 | -296.2811  | -6832.41  | -28586.79  |
| Delta V^Pauli GGA-Exchange:                                     | 0.616742640331513   | 16.7824    | 387.01    | 1619.26    |
| Delta V^Pauli GGA-Correlation:                                  | -0.171174271119875  | -4.6579    | -107.41   | -449.42    |
| -----                                                           |                     |            |           |            |
| Total Pauli Repulsion:                                          | 31.790449572684832  | 865.0621   | 19948.81  | 83465.81   |
| (Total Pauli Repulsion =<br>Delta E^Pauli in BB paper)          |                     |            |           |            |
| Steric Interaction                                              |                     |            |           |            |
| Pauli Repulsion (Delta E^Pauli):                                | 31.790449572684832  | 865.0621   | 19948.81  | 83465.81   |
| Electrostatic Interaction:                                      | -6.629574595953757  | -180.3999  | -4160.12  | -17405.95  |
| (Electrostatic Interaction =<br>Delta V_elstat in the BB paper) |                     |            |           |            |
| -----                                                           |                     |            |           |            |



Electronic Supplementary Information for Dalton Transactions  
 This journal is © The Royal Society of Chemistry 2010

|                                                                                                   |                     |            |           |            |
|---------------------------------------------------------------------------------------------------|---------------------|------------|-----------|------------|
| Total Steric Interaction:<br>(Total Steric Interaction =<br>Delta E <sup>0</sup> in the BB paper) | 25.160874976731073  | 684.6622   | 15788.69  | 66059.87   |
| Orbital Interactions                                                                              |                     |            |           |            |
| A:                                                                                                | -32.986530593300756 | -897.6092  | -20699.36 | -86606.12  |
| Total Orbital Interactions:                                                                       | -32.990678374676605 | -897.7220  | -20701.97 | -86617.01  |
| Alternative Decomposition Orb.Int.                                                                |                     |            |           |            |
| Kinetic:                                                                                          | -79.243104633062956 | -2156.3146 | -49725.80 | -208052.74 |
| Coulomb:                                                                                          | 42.700545085533875  | 1161.9410  | 26795.00  | 112110.27  |
| XC:                                                                                               | 3.551881172852443   | 96.6516    | 2228.84   | 9325.46    |
| Total Orbital Interactions:                                                                       | -32.990678374676641 | -897.7220  | -20701.97 | -86617.01  |
| Residu (E=Steric+OrbInt+Res):                                                                     | 0.000008434273668   | 0.0002     | 0.01      | 0.02       |
| Solvation Energy (el):                                                                            | -0.040655934798634  | -1.1063    | -25.51    | -106.74    |
| Dispersion Energy:                                                                                | -0.063948102126499  | -1.7401    | -40.13    | -167.90    |
| Post-SCF Solvation Energies                                                                       |                     |            |           |            |
| Solvation Energy (cd):                                                                            | 0.004649070957629   | 0.1265     | 2.92      | 12.21      |
| Total Bonding Energy:                                                                             | -7.929749929639369  | -215.7795  | -4975.99  | -20819.56  |

Summary of Bonding Energy (energy terms are taken from the energy decomposition above)

|                                 |                    |           |          |           |
|---------------------------------|--------------------|-----------|----------|-----------|
| Electrostatic Energy:           | -6.629574595953757 | -180.3999 | -4160.12 | -17405.95 |
| Kinetic Energy:                 | 7.418673021143363  | 201.8724  | 4655.29  | 19477.72  |
| Coulomb (Steric+OrbInt) Energy: | -1.728211227878823 | -47.0270  | -1084.47 | -4537.42  |
| XC Energy:                      | -6.890682160982680 | -187.5050 | -4323.97 | -18091.48 |
| Solvation:                      | -0.036006863841006 | -0.9798   | -22.59   | -94.54    |
| Dispersion Energy:              | -0.063948102126499 | -1.7401   | -40.13   | -167.90   |
| Total Bonding Energy:           | -7.929749929639402 | -215.7795 | -4975.99 | -20819.56 |

F R A G M E N T E N E R G Y T E R M S \*\*\* (summed over all fragments) \*\*\*

The energy terms below are (parts of) the Total Energy of the fragments from which the molecule is built.

|                          |                      |            |            |            |
|--------------------------|----------------------|------------|------------|------------|
| Exchange and Correlation |                      |            |            |            |
| Exchange LDA:            | -239.772123012376255 | -6524.5314 | -150459.29 | -629521.62 |
| Exchange GGA:            | -20.771815684510845  | -565.2299  | -13034.51  | -54536.39  |
| Correlation LDA:         | -13.181904104994603  | -358.6979  | -8271.77   | -34609.08  |
| Correlation GGA:         | 6.202739683513089    | 168.7851   | 3892.28    | 16285.29   |
| Total XC:                | -267.523103118368624 | -7279.6740 | -167873.30 | -702381.81 |

Intensities  
 =====

| Frequency<br>cm-1 | Dipole Strength<br>1e-40 esu2 cm2 | Absorption Intensity (degeneracy not counted)<br>km/mole |
|-------------------|-----------------------------------|----------------------------------------------------------|
| 33.976016         | 422.247173                        | 3.595980                                                 |
| 57.131702         | 410.711049                        | 5.881548                                                 |
| 67.060677         | 101.738845                        | 1.710144                                                 |
| 76.989742         | 190.196450                        | 3.670400                                                 |
| 84.196149         | 14.573301                         | 0.307559                                                 |
| 93.826693         | 19.992513                         | 0.470188                                                 |
| 99.314660         | 27.774528                         | 0.691414                                                 |
| 113.754396        | 68.405443                         | 1.950459                                                 |
| 122.969244        | 337.178206                        | 10.392836                                                |
| 139.611631        | 95.780735                         | 3.351798                                                 |
| 181.254471        | 132.202925                        | 6.006312                                                 |
| 197.341669        | 17.715424                         | 0.876291                                                 |
| 211.459664        | 198.885106                        | 10.541632                                                |
| 221.177424        | 842.387931                        | 46.701518                                                |
| 230.219626        | 505.176806                        | 29.151695                                                |
| 268.679998        | 370.283842                        | 24.937228                                                |
| 278.281099        | 319.999786                        | 22.320888                                                |
| 292.194666        | 250.446301                        | 18.342772                                                |
| 368.163140        | 52.316965                         | 4.827929                                                 |
| 410.018614        | 117.498875                        | 12.075784                                                |
| 422.073053        | 13.224198                         | 1.399056                                                 |
| 464.257702        | 24.795425                         | 2.885418                                                 |
| 469.943877        | 45.739532                         | 5.387854                                                 |

|             |             |             |
|-------------|-------------|-------------|
| 479.220795  | 28.348413   | 3.405199    |
| 493.436391  | 40.138668   | 4.964462    |
| 514.205291  | 124.856413  | 16.092572   |
| 538.668254  | 61.228144   | 8.267050    |
| 553.700253  | 10.682396   | 1.482591    |
| 568.530682  | 357.378796  | 50.928485   |
| 587.670092  | 338.575377  | 49.873177   |
| 620.304175  | 53.958217   | 8.389583    |
| 629.472319  | 200.175186  | 31.583841   |
| 638.427251  | 30.533238   | 4.886100    |
| 654.818190  | 20.056956   | 3.292030    |
| 680.405882  | 183.291415  | 31.259948   |
| 716.859606  | 186.258371  | 33.467863   |
| 717.874818  | 110.582013  | 19.898085   |
| 723.655864  | 317.924456  | 57.667894   |
| 737.758714  | 724.780755  | 134.029091  |
| 749.484107  | 4.097587    | 0.769784    |
| 780.021987  | 84.737673   | 16.567671   |
| 782.762149  | 14.462813   | 2.837662    |
| 846.829804  | 4.411011    | 0.936294    |
| 864.714910  | 1.333173    | 0.288960    |
| 924.312601  | 6.972639    | 1.615452    |
| 933.233984  | 185.451630  | 43.380971   |
| 960.547757  | 1.556144    | 0.374668    |
| 963.154511  | 6.107075    | 1.474373    |
| 978.382873  | 2.015526    | 0.494283    |
| 992.650123  | 22.494932   | 5.597047    |
| 1002.031905 | 140.985235  | 35.410597   |
| 1009.520874 | 2.514812    | 0.636354    |
| 1037.374484 | 1.397240    | 0.363316    |
| 1042.542874 | 106.182048  | 27.747451   |
| 1043.852869 | 349.353209  | 91.407556   |
| 1085.246689 | 13.875986   | 3.774595    |
| 1096.001353 | 91.643370   | 25.176202   |
| 1098.790969 | 664.037766  | 182.888304  |
| 1118.802762 | 18.668392   | 5.235263    |
| 1135.570649 | 24.107599   | 6.861928    |
| 1152.231714 | 105.283486  | 30.407320   |
| 1230.321630 | 71.876813   | 22.165909   |
| 1259.054977 | 95.192676   | 30.041824   |
| 1277.889800 | 28.651752   | 9.177463    |
| 1295.512734 | 34.521558   | 11.210117   |
| 1306.702835 | 86.000269   | 28.167916   |
| 1310.617310 | 89.602191   | 29.435580   |
| 1344.644484 | 421.455862  | 142.048824  |
| 1397.948230 | 145.525346  | 50.992676   |
| 1414.394063 | 73.712118   | 26.132887   |
| 1432.474275 | 18.243469   | 6.550468    |
| 1459.624369 | 429.751053  | 157.230257  |
| 1528.857230 | 53.874525   | 20.645645   |
| 1544.144584 | 116.772463  | 45.196674   |
| 1560.426871 | 209.093267  | 81.782718   |
| 1562.574585 | 76.560265   | 29.986257   |
| 1580.624125 | 195.000393  | 77.257769   |
| 1585.942982 | 199.513923  | 79.311990   |
| 1908.204906 | 2676.747864 | 1280.296456 |
| 1986.223087 | 2490.237454 | 1239.786368 |
| 2162.590495 | 1939.212285 | 1051.181511 |
| 2443.421295 | 314.083902  | 192.363249  |
| 2523.175321 | 202.149436  | 127.849205  |
| 3086.603944 | 0.912530    | 0.706002    |
| 3096.930900 | 0.984625    | 0.764330    |
| 3098.777773 | 74.626212   | 57.964207   |
| 3101.463495 | 15.870022   | 12.337361   |
| 3105.173658 | 0.064833    | 0.050461    |
| 3112.336004 | 31.894298   | 24.881559   |
| 3125.829070 | 3.155663    | 2.472487    |
| 3133.981760 | 1.850094    | 1.453343    |
| 3294.833850 | 92.259954   | 76.194710   |
| 3397.318888 | 188.756250  | 160.736951  |
| 3439.640922 | 124.903153  | 107.687323  |

Zero-Point Energy : 0.242546 a.u.  
===== 6.600003 eV

P1

Geometry CYCLE 10

=====

Energy gradients wrt nuclear displacements

=====

| Atom  | Cartesian (a.u./angstrom) |           |           |
|-------|---------------------------|-----------|-----------|
|       | X                         | Y         | Z         |
| 1 O   | -0.000120                 | 0.000178  | -0.000174 |
| 2 O   | -0.000117                 | 0.000343  | -0.000190 |
| 3 C   | 0.000112                  | -0.000365 | 0.000382  |
| 4 C   | 0.000291                  | -0.000793 | 0.000394  |
| 5 H   | -0.000004                 | -0.000069 | 0.000000  |
| 6 Ru  | -0.000326                 | 0.000812  | -0.000601 |
| 7 C   | -0.000020                 | -0.000121 | -0.000061 |
| 8 H   | -0.000070                 | -0.000040 | -0.000042 |
| 9 N   | -0.000002                 | -0.000028 | 0.000102  |
| 10 H  | -0.000004                 | -0.000011 | -0.000005 |
| 11 C  | -0.000027                 | 0.000014  | -0.000004 |
| 12 C  | 0.000023                  | -0.000030 | -0.000036 |
| 13 C  | 0.000004                  | 0.000002  | -0.000048 |
| 14 C  | -0.000033                 | -0.000118 | -0.000075 |
| 15 C  | 0.000073                  | 0.000064  | 0.000058  |
| 16 C  | -0.000148                 | -0.000021 | -0.000090 |
| 17 C  | 0.000001                  | 0.000014  | 0.000022  |
| 18 C  | 0.000021                  | 0.000056  | -0.000028 |
| 19 H  | 0.000014                  | 0.000018  | 0.000078  |
| 20 H  | -0.000001                 | -0.000003 | -0.000020 |
| 21 C  | 0.000045                  | 0.000009  | 0.000145  |
| 22 H  | 0.000007                  | 0.000019  | -0.000011 |
| 23 C  | -0.000026                 | 0.000046  | -0.000029 |
| 24 H  | 0.000015                  | 0.000003  | -0.000025 |
| 25 H  | -0.000005                 | -0.000010 | -0.000035 |
| 26 Cl | -0.000048                 | 0.000092  | 0.000056  |
| 27 N  | 0.000118                  | 0.000204  | -0.000004 |
| 28 H  | -0.000093                 | -0.000137 | -0.000048 |
| 29 H  | 0.000150                  | 0.000115  | 0.000054  |
| 30 H  | 0.000093                  | 0.000181  | -0.000031 |
| 31 B  | 0.000038                  | -0.000068 | 0.000083  |
| 32 H  | -0.000018                 | 0.000066  | -0.000003 |
| 33 H  | 0.000145                  | -0.000167 | 0.000155  |
| 34 H  | -0.000087                 | -0.000256 | 0.000031  |

-----  
 Geometry Convergence after Step 10

|                          |            |                     |   |  |
|--------------------------|------------|---------------------|---|--|
| current energy           |            | -7.88823413 Hartree |   |  |
| abs of energy change     | 0.00002475 | 0.00100000          | T |  |
| constrained gradient max | 0.00081249 | 0.00100000          | T |  |
| constrained gradient rms | 0.00017238 | 0.00066667          | T |  |
| gradient max             | 0.00081249 |                     |   |  |
| gradient rms             | 0.00017238 |                     |   |  |
| cart. step max           | 0.00785528 | 0.01000000          | T |  |
| cart. step rms           | 0.00274279 | 0.00666667          | T |  |

|                                                                 | hartree                   | eV              | kcal/mol        | kJ/mol          |
|-----------------------------------------------------------------|---------------------------|-----------------|-----------------|-----------------|
|                                                                 | -----                     | -----           | -----           | -----           |
| <b>Pauli Repulsion</b>                                          |                           |                 |                 |                 |
| Kinetic (Delta T^0):                                            | 85.850013701953714        | 2336.0977       | 53871.70        | 225399.18       |
| Delta V^Pauli Coulomb:                                          | -43.833455946310593       | -1192.7690      | -27505.91       | -115084.72      |
| Delta V^Pauli LDA-XC:                                           | -10.779625025509761       | -293.3285       | -6764.32        | -28301.90       |
| Delta V^Pauli GGA-Exchange:                                     | 6.608438484002487         | 16.5565         | 381.80          | 1597.46         |
| Delta V^Pauli GGA-Correlation:                                  | -0.167313740046859        | -4.5528         | -104.99         | -439.28         |
| <b>Total Pauli Repulsion:</b>                                   | <b>31.678057474088988</b> | <b>862.0038</b> | <b>19878.28</b> | <b>83170.73</b> |
| (Total Pauli Repulsion =<br>Delta E^Pauli in BB paper)          |                           |                 |                 |                 |
| <b>Steric Interaction</b>                                       |                           |                 |                 |                 |
| Pauli Repulsion (Delta E^Pauli):                                | 31.678057474088988        | 862.0038        | 19878.28        | 83170.73        |
| Electrostatic Interaction:                                      | -6.567625991329886        | -178.7142       | -4121.25        | -17243.30       |
| (Electrostatic Interaction =<br>Delta V_elstat in the BB paper) |                           |                 |                 |                 |
| <b>Total Steric Interaction:</b>                                | <b>25.110431482759100</b> | <b>683.2896</b> | <b>15757.04</b> | <b>65927.43</b> |
| (Total Steric Interaction =<br>Delta E^0 in the BB paper)       |                           |                 |                 |                 |

|                                    |                     |            |           |            |
|------------------------------------|---------------------|------------|-----------|------------|
| Orbital Interactions               |                     |            |           |            |
| A:                                 | -32.902929010286584 | -895.3343  | -20646.90 | -86386.63  |
|                                    | -----               | -----      | -----     | -----      |
| Total Orbital Interactions:        | -32.907317368662781 | -895.4537  | -20649.66 | -86398.15  |
| Alternative Decomposition Orb.Int. |                     |            |           |            |
| Kinetic:                           | -78.489519600697037 | -2135.8085 | -49252.92 | -206074.20 |
| Coulomb:                           | 42.099836249406344  | 1145.5948  | 26418.05  | 110533.10  |
| XC:                                | 3.482365982627930   | 94.7600    | 2185.22   | 9142.95    |
|                                    | -----               | -----      | -----     | -----      |
| Total Orbital Interactions:        | -32.907317368662760 | -895.4537  | -20649.66 | -86398.15  |
| Residu (E=Steric+OrbInt+Res):      | 0.000000963283979   | 0.0000     | 0.00      | 0.00       |
| Solvation Energy (el):             | -0.031455622264134  | -0.8560    | -19.74    | -82.59     |
| Dispersion Energy:                 | -0.064541384479097  | -1.7563    | -40.50    | -169.45    |
| Post-SCF Solvation Energies        |                     |            |           |            |
| Solvation Energy (cd):             | 0.004647788007275   | 0.1265     | 2.92      | 12.20      |
| Total Bonding Energy:              | -7.888234141355658  | -214.6498  | -4949.94  | -20710.56  |

Summary of Bonding Energy (energy terms are taken from the energy decomposition above)

|                                 |                    |           |          |           |
|---------------------------------|--------------------|-----------|----------|-----------|
| =====                           |                    |           |          |           |
| Electrostatic Energy:           | -6.567625991329886 | -178.7142 | -4121.25 | -17243.30 |
| Kinetic Energy:                 | 7.360494101256677  | 200.2892  | 4618.78  | 19324.97  |
| Coulomb (Steric+OrbInt) Energy: | -1.733618733620268 | -47.1742  | -1087.86 | -4551.62  |
| XC Energy:                      | -6.856134298926202 | -186.5649 | -4302.29 | -18000.78 |
| Solvation:                      | -0.026807834256858 | -0.7295   | -16.82   | -70.38    |
| Dispersion Energy:              | -0.064541384479097 | -1.7563   | -40.50   | -169.45   |
|                                 | -----              | -----     | -----    | -----     |
| Total Bonding Energy:           | -7.888234141355635 | -214.6498 | -4949.94 | -20710.56 |

FRAGMENT ENERGY TERMS \*\*\* (summed over all fragments) \*\*\*

The energy terms below are (parts of) the Total Energy of the fragments from which the molecule is built.

|                          |                      |            |            |            |
|--------------------------|----------------------|------------|------------|------------|
| Exchange and Correlation |                      |            |            |            |
| Exchange LDA:            | -239.772821476299896 | -6524.5504 | -150459.73 | -629523.45 |
| Exchange GGA:            | -20.772122435027267  | -565.2382  | -13034.70  | -54537.20  |
| Correlation LDA:         | -13.181976717267531  | -358.6998  | -8271.82   | -34609.27  |
| Correlation GGA:         | 6.202756447320331    | 168.7856   | 3892.29    | 16285.33   |
|                          | -----                | -----      | -----      | -----      |
| Total XC:                | -267.524164181274386 | -7279.7029 | -167873.97 | -702384.59 |

Intensities  
=====

| Frequency<br>cm-1 | Dipole Strength<br>1e-40 esu <sup>2</sup> cm <sup>2</sup> | Absorption Intensity (degeneracy not counted)<br>km/mole |
|-------------------|-----------------------------------------------------------|----------------------------------------------------------|
| -----             | -----                                                     | -----                                                    |
| 17.441177         | 1808.027659                                               | 7.904218                                                 |
| 33.268015         | 174.338802                                                | 1.453781                                                 |
| 52.097298         | 193.427013                                                | 2.525867                                                 |
| 55.896820         | 180.896578                                                | 2.534519                                                 |
| 61.139440         | 190.349609                                                | 2.917101                                                 |
| 75.997170         | 3.867372                                                  | 0.073670                                                 |
| 83.702769         | 421.703997                                                | 8.847603                                                 |
| 88.903656         | 34.246101                                                 | 0.763148                                                 |
| 93.499058         | 358.886141                                                | 8.410891                                                 |
| 100.562171        | 353.061563                                                | 8.899450                                                 |
| 116.235174        | 55.698618                                                 | 1.622782                                                 |
| 133.444759        | 424.546610                                                | 14.200544                                                |
| 146.025235        | 1113.654273                                               | 40.762083                                                |
| 156.450414        | 632.585146                                                | 24.806973                                                |
| 193.142270        | 464.248749                                                | 22.475333                                                |
| 216.302397        | 141.701906                                                | 7.682722                                                 |
| 272.600357        | 837.965504                                                | 57.257269                                                |
| 283.361546        | 39.240765                                                 | 2.787125                                                 |
| 307.493075        | 876.532660                                                | 67.558736                                                |
| 326.924968        | 27.929647                                                 | 2.288714                                                 |
| 358.558763        | 355.421846                                                | 31.943502                                                |
| 366.387717        | 291.763698                                                | 26.794782                                                |
| 412.032499        | 2023.508332                                               | 208.984723                                               |
| 420.288594        | 671.329238                                                | 70.723091                                                |
| 430.263004        | 175.606312                                                | 18.938789                                                |
| 441.153275        | 2232.405419                                               | 246.854271                                               |

|             |             |             |
|-------------|-------------|-------------|
| 461.208055  | 90.068178   | 10.412292   |
| 475.116237  | 3857.675261 | 459.413347  |
| 500.929422  | 69.262677   | 8.696688    |
| 506.718005  | 366.096405  | 46.498599   |
| 538.326668  | 83.870193   | 11.317008   |
| 566.166521  | 234.356514  | 33.258242   |
| 576.285049  | 262.794406  | 37.960466   |
| 602.299118  | 21.534602   | 3.251076    |
| 614.102743  | 4.226025    | 0.650506    |
| 644.610495  | 2.050559    | 0.331320    |
| 657.891806  | 41.807956   | 6.894321    |
| 702.409351  | 73.563803   | 12.951872   |
| 728.155706  | 733.944990  | 133.957131  |
| 740.778911  | 456.566109  | 84.775498   |
| 744.505022  | 35.656629   | 6.654049    |
| 769.015394  | 288.002022  | 55.514782   |
| 770.821970  | 37.132071   | 7.174330    |
| 828.593130  | 438.848268  | 91.145197   |
| 851.543689  | 95.239576   | 20.328365   |
| 871.650966  | 151.327175  | 33.062646   |
| 874.638551  | 2788.429950 | 611.316932  |
| 898.921641  | 1022.567945 | 230.405096  |
| 947.552970  | 3.592558    | 0.853268    |
| 948.494013  | 13.038246   | 3.099787    |
| 968.595987  | 156.192852  | 37.921184   |
| 977.884433  | 22.505950   | 5.516491    |
| 979.458354  | 5.264868    | 1.292562    |
| 994.587878  | 39.297375   | 9.796812    |
| 1005.358455 | 21.467613   | 5.409819    |
| 1008.859749 | 97.938414   | 24.766346   |
| 1019.224029 | 23.762924   | 6.070823    |
| 1036.643570 | 54.239409   | 14.093617   |
| 1048.945234 | 19.292485   | 5.072465    |
| 1056.917290 | 35.763204   | 9.474482    |
| 1079.306490 | 17.007692   | 4.601170    |
| 1082.899262 | 128.641869  | 34.917928   |
| 1113.019091 | 13.599908   | 3.794169    |
| 1123.137773 | 2.834125    | 0.797866    |
| 1134.130033 | 10.713145   | 3.045495    |
| 1228.985421 | 319.997041  | 98.575903   |
| 1244.588559 | 16.409299   | 5.119103    |
| 1267.787357 | 10.108956   | 3.212409    |
| 1290.194064 | 29.704316   | 9.606223    |
| 1299.339340 | 40.743248   | 13.269553   |
| 1337.517818 | 111.663548  | 37.435968   |
| 1402.985404 | 26.710153   | 9.393071    |
| 1421.924626 | 56.681140   | 20.201947   |
| 1442.473143 | 282.324800  | 102.078631  |
| 1473.527229 | 25.439925   | 9.396196    |
| 1532.787876 | 40.615656   | 15.604635   |
| 1546.139188 | 67.195792   | 26.041664   |
| 1548.523804 | 119.149429  | 46.247464   |
| 1568.650492 | 121.521882  | 47.781386   |
| 1587.136826 | 74.798294   | 29.756656   |
| 1803.115743 | 516.730276  | 233.542317  |
| 1914.904119 | 3678.801247 | 1765.759000 |
| 1976.324326 | 3040.015220 | 1505.955172 |
| 2450.057036 | 238.555389  | 146.501981  |
| 2484.428416 | 469.718167  | 292.510807  |
| 3087.911623 | 73.716699   | 57.056984   |
| 3101.219978 | 1.914721    | 1.488388    |
| 3106.220283 | 0.165216    | 0.128636    |
| 3110.135294 | 2.175261    | 1.695777    |
| 3116.394185 | 2.060948    | 1.609895    |
| 3119.338058 | 8.571640    | 6.702000    |
| 3124.387049 | 18.369522   | 14.386023   |
| 3126.234007 | 6.386173    | 5.004264    |
| 3130.150717 | 5.455150    | 4.280062    |
| 3450.591876 | 56.453635   | 48.827397   |
| 3551.474709 | 45.412573   | 40.426199   |

Zero-Point Energy : 0.238156 a.u.  
===== 6.480550 eV

P2

Geometry CYCLE 18

=====

Energy gradients wrt nuclear displacements

=====

| Atom  | Cartesian (a.u./angstrom) |           |            |
|-------|---------------------------|-----------|------------|
|       | X                         | Y         | Z          |
| 1 O   | 0.000031                  | 0.000075  | -0.000115  |
| 2 O   | -0.000067                 | -0.000044 | -0.000052  |
| 3 C   | 0.000478                  | -0.000259 | 0.000030   |
| 4 C   | 0.000020                  | 0.000196  | 0.000140   |
| 5 H   | 0.000019                  | 0.000012  | -0.000006  |
| 6 Ru  | -0.000336                 | -0.000177 | 0.000588   |
| 7 C   | 0.000014                  | 0.000187  | 0.000074   |
| 8 H   | -0.000026                 | 0.000038  | 0.000024   |
| 9 N   | 0.000109                  | -0.000365 | -0.000188  |
| 10 H  | -0.000081                 | 0.000040  | -0.000059  |
| 11 C  | 0.000052                  | 0.000006  | -0.000013  |
| 12 C  | -0.000199                 | 0.000855  | -0.000486  |
| 13 C  | 0.000416                  | 0.000407  | -0.0000710 |
| 14 C  | -0.000348                 | 0.000173  | 0.000102   |
| 15 C  | -0.000070                 | -0.000071 | -0.000051  |
| 16 C  | 0.000200                  | -0.000281 | 0.000026   |
| 17 C  | 0.000100                  | 0.000020  | -0.000008  |
| 18 C  | -0.000374                 | -0.000611 | 0.000396   |
| 19 H  | 0.000039                  | -0.000065 | -0.000014  |
| 20 H  | -0.000106                 | -0.000008 | 0.000020   |
| 21 C  | -0.000039                 | 0.000139  | -0.000209  |
| 22 H  | 0.000042                  | 0.000010  | 0.000078   |
| 23 C  | 0.000135                  | -0.000035 | 0.000009   |
| 24 H  | -0.000048                 | -0.000036 | -0.000043  |
| 25 H  | -0.000082                 | -0.000009 | 0.000039   |
| 26 Cl | 0.000039                  | -0.000191 | 0.000222   |
| 27 H  | 0.000025                  | -0.000069 | 0.000215   |
| 28 H  | 0.000054                  | 0.000062  | -0.000009  |

-----  
 Geometry Convergence after Step 18

|                                                                 |                     |            |           |            |
|-----------------------------------------------------------------|---------------------|------------|-----------|------------|
| current energy                                                  | -6.78439363 Hartree |            |           |            |
| abs of energy change                                            | 0.00005451          | 0.00100000 | T         |            |
| constrained gradient max                                        | 0.00085466          | 0.00100000 | T         |            |
| constrained gradient rms                                        | 0.00022375          | 0.00066667 | T         |            |
| gradient max                                                    | 0.00085466          |            |           |            |
| gradient rms                                                    | 0.00022375          |            |           |            |
| cart. step max                                                  | 0.00876331          | 0.01000000 | T         |            |
| cart. step rms                                                  | 0.00173213          | 0.00666667 | T         |            |
|                                                                 | hartree             | eV         | kcal/mol  | kJ/mol     |
|                                                                 | -----               | -----      | -----     | -----      |
| Pauli Repulsion                                                 |                     |            |           |            |
| Kinetic (Delta T^0):                                            | 76.411046746351758  | 2079.2504  | 47948.66  | 200617.17  |
| Delta V^Pauli Coulomb:                                          | -39.376368541834651 | -1071.4855 | -24709.05 | -103382.64 |
| Delta V^Pauli LDA-XC:                                           | -9.466783612994247  | -257.6043  | -5940.50  | -24855.04  |
| Delta V^Pauli GGA-Exchange:                                     | 0.543926759927519   | 14.8010    | 341.32    | 1428.08    |
| Delta V^Pauli GGA-Correlation:                                  | -0.150789388528797  | -4.1032    | -94.62    | -395.90    |
| Total Pauli Repulsion:                                          | 27.961031962921581  | 760.8584   | 17545.81  | 73411.68   |
| (Total Pauli Repulsion =<br>Delta E^Pauli in BB paper)          |                     |            |           |            |
| Steric Interaction                                              |                     |            |           |            |
| Pauli Repulsion (Delta E^Pauli):                                | 27.961031962921581  | 760.8584   | 17545.81  | 73411.68   |
| Electrostatic Interaction:                                      | -5.915414081496593  | -160.9666  | -3711.98  | -15530.92  |
| (Electrostatic Interaction =<br>Delta V_elstat in the BB paper) |                     |            |           |            |
| Total Steric Interaction:                                       | 22.045617881424988  | 599.8918   | 13833.84  | 57880.76   |
| (Total Steric Interaction =<br>Delta E^0 in the BB paper)       |                     |            |           |            |
| Orbital Interactions                                            |                     |            |           |            |
| A:                                                              | -28.752062006059763 | -782.3834  | -18042.19 | -75488.53  |
| Total Orbital Interactions:                                     | -28.756256833774408 | -782.4976  | -18044.83 | -75499.54  |

Electronic Supplementary Information for Dalton Transactions  
This journal is © The Royal Society of Chemistry 2010

|                                    |                     |            |           |            |
|------------------------------------|---------------------|------------|-----------|------------|
| Alternative Decomposition Orb.Int. |                     |            |           |            |
| Kinetic:                           | -70.097410953647497 | -1907.4476 | -43986.79 | -184040.73 |
| Coulomb:                           | 38.138902120590956  | 1037.8123  | 23932.52  | 100133.67  |
| XC:                                | 3.202251999282123   | 87.1377    | 2009.44   | 8407.51    |
| -----                              |                     |            |           |            |
| Total Orbital Interactions:        | -28.756256833774419 | -782.4976  | -18044.83 | -75499.54  |
|                                    |                     |            |           |            |
| Residu (E=Steric+OrbInt+Res):      | -0.000000380539911  | 0.0000     | 0.00      | 0.00       |
|                                    |                     |            |           |            |
| Solvation Energy (el):             | -0.029773514518873  | -0.8102    | -18.68    | -78.17     |
| Dispersion Energy:                 | -0.048379706086047  | -1.3165    | -30.36    | -127.02    |
|                                    |                     |            |           |            |
| Post-SCF Solvation Energies        |                     |            |           |            |
| Solvation Energy (cd):             | 0.004397429249231   | 0.1197     | 2.76      | 11.55      |
|                                    |                     |            |           |            |
| Total Bonding Energy:              | -6.784395124245020  | -184.6128  | -4257.27  | -17812.43  |

Summary of Bonding Energy (energy terms are taken from the energy decomposition above)

|                                 |                    |           |          |           |
|---------------------------------|--------------------|-----------|----------|-----------|
| =====                           |                    |           |          |           |
| Electrostatic Energy:           | -5.915414081496593 | -160.9666 | -3711.98 | -15530.92 |
| Kinetic Energy:                 | 6.313635792704261  | 171.8028  | 3961.87  | 16576.45  |
| Coulomb (Steric+OrbInt) Energy: | -1.237466801783604 | -33.6732  | -776.52  | -3248.97  |
| XC Energy:                      | -5.871394242313402 | -159.7688 | -3684.36 | -15415.34 |
| Solvation:                      | -0.025376085269642 | -0.6905   | -15.92   | -66.62    |
| Dispersion Energy:              | -0.048379706086047 | -1.3165   | -30.36   | -127.02   |
| -----                           |                    |           |          |           |
| Total Bonding Energy:           | -6.784395124245027 | -184.6128 | -4257.27 | -17812.43 |

F R A G M E N T E N E R G Y T E R M S \*\*\* (summed over all fragments) \*\*\*

The energy terms below are (parts of) the Total Energy of the fragments from which the molecule is built.

|                          |                      |            |            |            |
|--------------------------|----------------------|------------|------------|------------|
| Exchange and Correlation |                      |            |            |            |
| Exchange LDA:            | -230.014086923651007 | -6259.0018 | -144336.03 | -603901.90 |
| Exchange GGA:            | -19.441419751636779  | -529.0279  | -12199.68  | -51043.44  |
| Correlation LDA:         | -12.268996968032374  | -333.8564  | -7698.91   | -32212.25  |
| Correlation GGA:         | 5.710012400272075    | 155.3773   | 3583.09    | 14991.64   |
| -----                    |                      |            |            |            |
| Total XC:                | -256.014491243048042 | -6966.5088 | -160651.54 | -672165.95 |

Intensities  
=====

| Frequency<br>cm-1 | Dipole Strength<br>1e-40 esu2 cm2 | Absorption Intensity (degeneracy not counted)<br>km/mole |
|-------------------|-----------------------------------|----------------------------------------------------------|
| -----             | -----                             | -----                                                    |
| 33.604897         | 50.954324                         | 0.429202                                                 |
| 53.643418         | 428.746225                        | 5.764940                                                 |
| 58.594115         | 215.889698                        | 3.170765                                                 |
| 70.008651         | 44.676816                         | 0.783993                                                 |
| 80.455450         | 60.856583                         | 1.227273                                                 |
| 87.347344         | 62.145475                         | 1.360621                                                 |
| 95.954450         | 197.723028                        | 4.755547                                                 |
| 110.904561        | 15.461064                         | 0.429800                                                 |
| 130.988728        | 300.102824                        | 9.853308                                                 |
| 138.139848        | 81.219511                         | 2.812273                                                 |
| 186.590388        | 73.936997                         | 3.458033                                                 |
| 212.467459        | 2.669260                          | 0.142155                                                 |
| 279.440550        | 42.990105                         | 3.011175                                                 |
| 305.369645        | 875.398201                        | 67.005366                                                |
| 327.123797        | 17.286448                         | 1.417412                                                 |
| 351.608334        | 42.952718                         | 3.785540                                                 |
| 368.644615        | 39.882381                         | 3.685251                                                 |
| 402.554928        | 177.675233                        | 17.927929                                                |
| 422.820678        | 280.037911                        | 29.679127                                                |
| 442.103300        | 44.230602                         | 4.901451                                                 |
| 452.037197        | 8.134429                          | 0.921678                                                 |
| 497.954222        | 68.241965                         | 8.517635                                                 |
| 510.113235        | 114.199725                        | 14.601912                                                |
| 535.407493        | 80.022162                         | 10.739221                                                |
| 567.738091        | 196.179233                        | 27.917668                                                |
| 570.889851        | 295.130838                        | 42.232324                                                |
| 602.094189        | 28.340574                         | 4.277117                                                 |
| 614.382012        | 9.664008                          | 1.488243                                                 |
| 643.044871        | 6.388816                          | 1.029769                                                 |
| 700.598238        | 74.330125                         | 13.053049                                                |
| 734.632036        | 664.087156                        | 122.284951                                               |
| 740.365786        | 640.757007                        | 118.909835                                               |
| 743.324630        | 38.243611                         | 7.125502                                                 |
| 773.725252        | 146.398516                        | 28.392361                                                |

Electronic Supplementary Information for Dalton Transactions  
This journal is © The Royal Society of Chemistry 2010

|             |             |             |
|-------------|-------------|-------------|
| 797.261421  | 430.318442  | 85.994124   |
| 817.299815  | 192.704865  | 39.477728   |
| 873.481182  | 33.730810   | 7.385134    |
| 879.428775  | 162.241227  | 35.763496   |
| 929.982516  | 40.199204   | 9.370663    |
| 948.218570  | 18.510611   | 4.399540    |
| 955.417180  | 9.244493    | 2.213881    |
| 979.796770  | 0.459157    | 0.112765    |
| 982.711922  | 3.763663    | 0.927075    |
| 990.068031  | 11.271060   | 2.797099    |
| 994.905869  | 18.217572   | 4.543082    |
| 1003.975157 | 12.332409   | 3.103480    |
| 1017.580427 | 11.088807   | 2.828340    |
| 1032.023798 | 34.375067   | 8.892243    |
| 1048.816097 | 43.670894   | 11.480730   |
| 1078.903019 | 15.525037   | 4.198490    |
| 1115.071592 | 13.383329   | 3.740632    |
| 1128.151424 | 11.920061   | 3.370730    |
| 1135.099905 | 0.957316    | 0.272375    |
| 1242.530825 | 9.172782    | 2.856843    |
| 1262.571705 | 14.341365   | 4.538628    |
| 1286.846769 | 46.506501   | 15.000943   |
| 1296.139969 | 13.101526   | 4.256492    |
| 1341.871374 | 93.561716   | 31.469304   |
| 1405.921845 | 35.393993   | 12.472939   |
| 1423.696589 | 58.327846   | 20.814762   |
| 1439.105368 | 315.417716  | 113.777594  |
| 1473.853251 | 13.541201   | 5.002528    |
| 1531.536551 | 24.822085   | 9.528920    |
| 1544.763598 | 8.546275    | 3.309154    |
| 1579.200416 | 114.424296  | 45.293259   |
| 1588.161635 | 68.229352   | 27.160891   |
| 1858.731237 | 545.576699  | 254.185330  |
| 1918.947671 | 3237.696877 | 1557.318305 |
| 1975.363786 | 2696.754555 | 1335.262274 |
| 3038.365403 | 1.748607    | 1.331712    |
| 3103.368484 | 9.429549    | 7.335037    |
| 3103.428485 | 17.242236   | 13.412613   |
| 3108.505375 | 2.408679    | 1.876759    |
| 3114.315350 | 3.618925    | 2.825012    |
| 3115.404071 | 20.802277   | 16.244387   |
| 3120.980870 | 6.435277    | 5.034269    |
| 3123.043328 | 6.618887    | 5.181328    |
| 3130.065663 | 3.497998    | 2.744423    |

Zero-Point Energy : 0.190636 a.u.  
===== 5.187473 eV



P3

Geometry CYCLE 15

=====

Energy gradients wrt nuclear displacements

=====

| Atom  | Cartesian (a.u./angstrom) |           |           |
|-------|---------------------------|-----------|-----------|
|       | X                         | Y         | Z         |
| 1 O   | 0.000026                  | -0.000092 | -0.000059 |
| 2 O   | -0.000024                 | 0.000070  | 0.000079  |
| 3 C   | -0.000063                 | 0.000069  | 0.000013  |
| 4 C   | 0.000087                  | 0.000089  | -0.000055 |
| 5 H   | -0.000038                 | 0.000010  | -0.000027 |
| 6 Ru  | 0.000119                  | -0.000201 | -0.000380 |
| 7 C   | 0.000051                  | -0.000053 | -0.000069 |
| 8 H   | -0.000016                 | -0.000015 | -0.000025 |
| 9 N   | -0.000104                 | 0.000012  | 0.000016  |
| 10 H  | 0.000008                  | -0.000004 | 0.000043  |
| 11 C  | 0.000025                  | -0.000061 | -0.000066 |
| 12 C  | -0.000063                 | 0.000026  | 0.000424  |
| 13 C  | -0.000017                 | -0.000051 | -0.000010 |
| 14 C  | 0.000037                  | 0.000077  | 0.000061  |
| 15 C  | 0.000023                  | 0.000032  | 0.000038  |
| 16 C  | -0.000037                 | 0.000019  | -0.000076 |
| 17 C  | -0.000067                 | -0.000058 | -0.000027 |
| 18 C  | 0.000021                  | 0.000005  | -0.000067 |
| 19 H  | 0.000025                  | 0.000031  | 0.000006  |
| 20 H  | -0.000064                 | 0.000027  | -0.000011 |
| 21 C  | 0.000027                  | 0.000031  | 0.000041  |
| 22 H  | -0.000018                 | -0.000066 | -0.000003 |
| 23 C  | -0.000022                 | -0.000025 | -0.000004 |
| 24 H  | 0.000033                  | 0.000028  | 0.000004  |
| 25 H  | 0.000009                  | 0.000005  | 0.000020  |
| 26 Cl | -0.000037                 | -0.000011 | 0.000199  |
| 27 H  | 0.000132                  | 0.000074  | 0.000011  |
| 28 H  | -0.000052                 | 0.000030  | -0.000076 |

-----  
 Geometry Convergence after Step 15

|                                                                 |                     |            |           |            |
|-----------------------------------------------------------------|---------------------|------------|-----------|------------|
| current energy                                                  | -6.78728185 Hartree |            |           |            |
| abs of energy change                                            | 0.00001444          | 0.00100000 | T         |            |
| constrained gradient max                                        | 0.00042389          | 0.00100000 | T         |            |
| constrained gradient rms                                        | 0.00008447          | 0.00066667 | T         |            |
| gradient max                                                    | 0.00042389          |            |           |            |
| gradient rms                                                    | 0.00008447          |            |           |            |
| cart. step max                                                  | 0.00711757          | 0.01000000 | T         |            |
| cart. step rms                                                  | 0.00179224          | 0.00666667 | T         |            |
|                                                                 | hartree             | eV         | kcal/mol  | kJ/mol     |
| -----                                                           |                     |            |           |            |
| Pauli Repulsion                                                 |                     |            |           |            |
| Kinetic (Delta T^0):                                            | 77.076846959820642  | 2097.3677  | 48366.46  | 202365.23  |
| Delta V^Pauli Coulomb:                                          | -39.780945724157696 | -1082.4946 | -24962.92 | -104444.86 |
| Delta V^Pauli LDA-XC:                                           | -9.543836622298651  | -259.7010  | -5988.85  | -25057.34  |
| Delta V^Pauli GGA-Exchange:                                     | 0.543573686927136   | 14.7914    | 341.10    | 1427.15    |
| Delta V^Pauli GGA-Correlation:                                  | -0.150678323361173  | -4.1002    | -94.55    | -395.61    |
| -----                                                           |                     |            |           |            |
| Total Pauli Repulsion:                                          | 28.144959976930259  | 765.8633   | 17661.23  | 73894.58   |
| (Total Pauli Repulsion =<br>Delta E^Pauli in BB paper)          |                     |            |           |            |
| Steric Interaction                                              |                     |            |           |            |
| Pauli Repulsion (Delta E^Pauli):                                | 28.144959976930259  | 765.8633   | 17661.23  | 73894.58   |
| Electrostatic Interaction:                                      | -5.966683419642836  | -162.3617  | -3744.15  | -15665.53  |
| (Electrostatic Interaction =<br>Delta V_elstat in the BB paper) |                     |            |           |            |
| -----                                                           |                     |            |           |            |
| Total Steric Interaction:                                       | 22.178276557287425  | 603.5016   | 13917.08  | 58229.06   |
| (Total Steric Interaction =<br>Delta E^0 in the BB paper)       |                     |            |           |            |
| Orbital Interactions                                            |                     |            |           |            |
| A:                                                              | -28.893104670104108 | -786.2214  | -18130.70 | -75858.84  |
| -----                                                           |                     |            |           |            |
| Total Orbital Interactions:                                     | -28.897080917737465 | -786.3296  | -18133.19 | -75869.28  |

Electronic Supplementary Information for Dalton Transactions  
 This journal is © The Royal Society of Chemistry 2010

|                                    |                     |            |           |            |
|------------------------------------|---------------------|------------|-----------|------------|
| Alternative Decomposition Orb.Int. |                     |            |           |            |
| Kinetic:                           | -70.708975459506945 | -1924.0891 | -44370.56 | -185646.39 |
| Coulomb:                           | 38.539508800826262  | 1048.7134  | 24183.91  | 101185.47  |
| XC:                                | 3.272385740943210   | 89.0461    | 2053.45   | 8591.65    |
|                                    | -----               | -----      | -----     | -----      |
| Total Orbital Interactions:        | -28.897080917737473 | -786.3296  | -18133.19 | -75869.28  |
| Residu (E=Steric+OrbInt+Res):      | 0.000000439274358   | 0.0000     | 0.00      | 0.00       |
| Solvation Energy (el):             | -0.026757495700882  | -0.7281    | -16.79    | -70.25     |
| Dispersion Energy:                 | -0.046166751547916  | -1.2563    | -28.97    | -121.21    |
| Post-SCF Solvation Energies        |                     |            |           |            |
| Solvation Energy (cd):             | 0.004446544521971   | 0.1210     | 2.79      | 11.67      |
| Total Bonding Energy:              | -6.787281623902508  | -184.6913  | -4259.08  | -17820.01  |

Summary of Bonding Energy (energy terms are taken from the energy decomposition above)

|                                 |                    |           |          |           |
|---------------------------------|--------------------|-----------|----------|-----------|
| =====                           |                    |           |          |           |
| Electrostatic Energy:           | -5.966683419642836 | -162.3617 | -3744.15 | -15665.53 |
| Kinetic Energy:                 | 6.367871500313697  | 173.2786  | 3995.90  | 16718.84  |
| Coulomb (Steric+OrbInt) Energy: | -1.241436484057076 | -33.7812  | -779.01  | -3259.39  |
| XC Energy:                      | -5.878555517789479 | -159.9636 | -3688.85 | -15434.15 |
| Solvation:                      | -0.022310951178911 | -0.6071   | -14.00   | -58.58    |
| Dispersion Energy:              | -0.046166751547916 | -1.2563   | -28.97   | -121.21   |
|                                 | -----              | -----     | -----    | -----     |
| Total Bonding Energy:           | -6.787281623902521 | -184.6913 | -4259.08 | -17820.01 |

F R A G M E N T E N E R G Y T E R M S \*\*\* (summed over all fragments) \*\*

The energy terms below are (parts of) the Total Energy of the fragments from which the molecule is built.

|                          |                      |            |            |            |
|--------------------------|----------------------|------------|------------|------------|
| Exchange and Correlation |                      |            |            |            |
| Exchange LDA:            | -230.014142088686469 | -6259.0033 | -144336.07 | -603902.04 |
| Exchange GGA:            | -19.441416099461748  | -529.0278  | -12199.67  | -51043.43  |
| Correlation LDA:         | -12.269002697508277  | -333.8566  | -7698.92   | -32212.26  |
| Correlation GGA:         | 5.709982425062107    | 155.3765   | 3583.07    | 14991.56   |
|                          | -----                | -----      | -----      | -----      |
| Total XC:                | -256.014578460594407 | -6966.5111 | -160651.59 | -672166.18 |

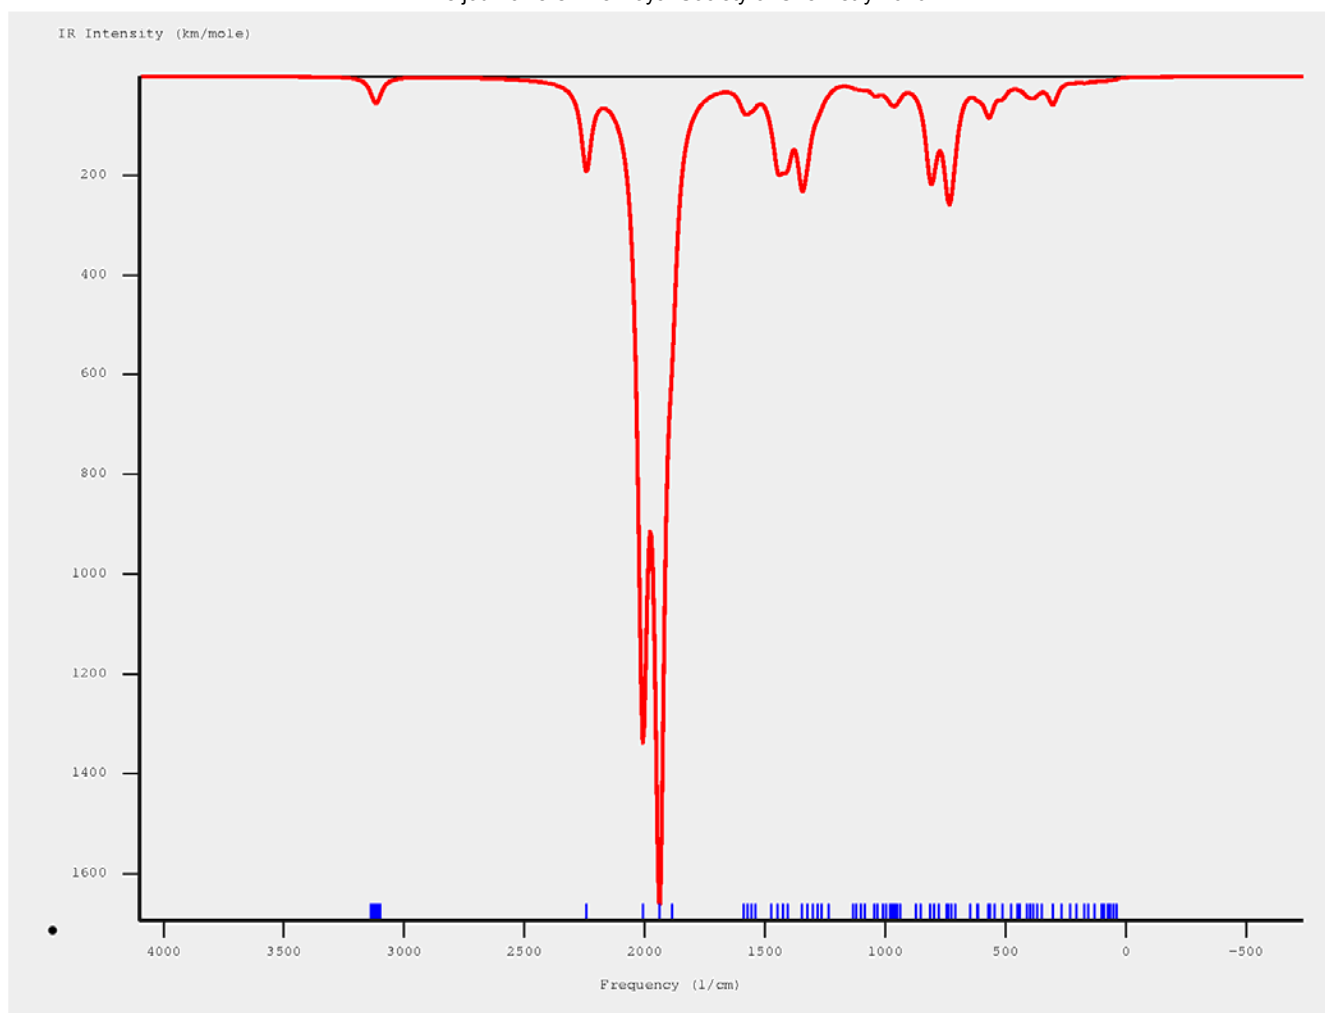

P3'

Geometry CYCLE 18

=====

Energy gradients wrt nuclear displacements

=====

| Atom  | Cartesian (a.u./angstrom) |           |           |
|-------|---------------------------|-----------|-----------|
|       | X                         | Y         | Z         |
| 1 O   | 0.000021                  | -0.000091 | -0.000073 |
| 2 O   | -0.000135                 | -0.000017 | 0.000112  |
| 3 C   | -0.000194                 | 0.000286  | 0.000327  |
| 4 C   | 0.000348                  | 0.000021  | -0.000220 |
| 5 H   | 0.000011                  | -0.000033 | 0.000018  |
| 6 Ru  | -0.000247                 | 0.000583  | -0.000831 |
| 7 C   | 0.000015                  | -0.000001 | 0.000066  |
| 8 H   | 0.000003                  | 0.000048  | 0.000038  |
| 9 N   | -0.000275                 | 0.000051  | 0.000138  |
| 10 H  | 0.000002                  | 0.000040  | -0.000045 |
| 11 C  | 0.000004                  | 0.000069  | -0.000014 |
| 12 C  | 0.000026                  | -0.000098 | -0.000073 |
| 13 C  | 0.000055                  | 0.000054  | 0.000093  |
| 14 C  | 0.000034                  | -0.000003 | -0.000192 |
| 15 C  | 0.000060                  | -0.000046 | 0.000001  |
| 16 C  | -0.000052                 | 0.000085  | 0.000167  |
| 17 C  | -0.000009                 | -0.000118 | -0.000091 |
| 18 C  | 0.000072                  | -0.000032 | 0.000021  |
| 19 H  | 0.000037                  | -0.000019 | 0.000015  |
| 20 H  | -0.000006                 | -0.000012 | 0.000018  |
| 21 C  | 0.000054                  | 0.000067  | -0.000131 |
| 22 H  | -0.000002                 | 0.000050  | 0.000000  |
| 23 C  | -0.000083                 | 0.000002  | 0.000070  |
| 24 H  | 0.000031                  | 0.000059  | -0.000016 |
| 25 H  | -0.000029                 | -0.000082 | 0.000017  |
| 26 Cl | 0.000151                  | -0.000279 | 0.000176  |
| 27 H  | -0.000017                 | -0.000047 | -0.000010 |
| 28 H  | 0.000066                  | 0.000004  | 0.000071  |
| 29 O  | -0.000246                 | -0.000567 | 0.000220  |
| 30 C  | 0.000035                  | 0.000118  | 0.000090  |
| 31 C  | -0.000004                 | -0.000112 | 0.000100  |
| 32 C  | 0.000045                  | -0.000030 | -0.000169 |
| 33 C  | 0.000096                  | -0.000065 | 0.000025  |
| 34 H  | -0.000003                 | -0.000009 | -0.000013 |
| 35 H  | 0.000032                  | -0.000017 | 0.000028  |
| 36 H  | 0.000046                  | 0.000057  | -0.000056 |
| 37 H  | 0.000046                  | -0.000037 | -0.000014 |
| 38 H  | -0.000046                 | -0.000073 | -0.000004 |
| 39 H  | -0.000054                 | 0.000124  | 0.000151  |
| 40 H  | 0.000070                  | 0.000077  | 0.000047  |
| 41 H  | 0.000043                  | -0.000007 | -0.000054 |

-----  
 Geometry Convergence after Step 18

|                                                        |                     |            |           |            |
|--------------------------------------------------------|---------------------|------------|-----------|------------|
| current energy                                         | -9.42046502 Hartree |            |           |            |
| abs of energy change                                   | 0.00006772          | 0.00100000 | T         |            |
| constrained gradient max                               | 0.00083074          | 0.00100000 | T         |            |
| constrained gradient rms                               | 0.00014505          | 0.00066667 | T         |            |
| gradient max                                           | 0.00083074          |            |           |            |
| gradient rms                                           | 0.00014505          |            |           |            |
| cart. step max                                         | 0.00676361          | 0.01000000 | T         |            |
| cart. step rms                                         | 0.00205083          | 0.00666667 | T         |            |
|                                                        | hartree             | eV         | kcal/mol  | kJ/mol     |
|                                                        | -----               | -----      | -----     | -----      |
| Pauli Repulsion                                        |                     |            |           |            |
| Kinetic (Delta T^0):                                   | 100.193694570014827 | 2726.4091  | 62872.50  | 263058.51  |
| Delta V^Pauli Coulomb:                                 | -50.965983262647889 | -1386.8550 | -31981.64 | -133811.17 |
| Delta V^Pauli LDA-XC:                                  | -12.764925762563845 | -347.3513  | -8010.11  | -33514.31  |
| Delta V^Pauli GGA-Exchange:                            | 0.747642560671622   | 20.3444    | 469.15    | 1962.94    |
| Delta V^Pauli GGA-Correlation:                         | -0.210630299668880  | -5.7315    | -132.17   | -553.01    |
| Total Pauli Repulsion:                                 | 36.999797805805841  | 1006.8157  | 23217.73  | 97142.96   |
| (Total Pauli Repulsion =<br>Delta E^Pauli in BB paper) |                     |            |           |            |
| Steric Interaction                                     |                     |            |           |            |
| Pauli Repulsion (Delta E^Pauli):                       | 36.999797805805841  | 1006.8157  | 23217.73  | 97142.96   |

Electronic Supplementary Information for Dalton Transactions  
This journal is © The Royal Society of Chemistry 2010

|                                                                                               |                     |            |           |            |
|-----------------------------------------------------------------------------------------------|---------------------|------------|-----------|------------|
| Electrostatic Interaction:<br>(Electrostatic Interaction =<br>Delta V_elstat in the BB paper) | -7.715163343534382  | -209.9403  | -4841.34  | -20256.16  |
| -----                                                                                         |                     |            |           |            |
| Total Steric Interaction:<br>(Total Steric Interaction =<br>Delta E^0 in the BB paper)        | 29.284634462271459  | 796.8754   | 18376.39  | 76886.80   |
| -----                                                                                         |                     |            |           |            |
| Orbital Interactions                                                                          |                     |            |           |            |
| A:                                                                                            | -38.591177988472595 | -1050.1194 | -24216.33 | -101321.12 |
| -----                                                                                         |                     |            |           |            |
| Total Orbital Interactions:                                                                   | -38.596403297164372 | -1050.2616 | -24219.61 | -101334.84 |
| -----                                                                                         |                     |            |           |            |
| Alternative Decomposition Orb.Int.                                                            |                     |            |           |            |
| Kinetic:                                                                                      | -91.348607027871736 | -2485.7221 | -57322.12 | -239835.73 |
| Coulomb:                                                                                      | 48.782280369864836  | 1327.4334  | 30611.35  | 128077.86  |
| XC:                                                                                           | 3.969923360842534   | 108.0271   | 2491.16   | 10423.03   |
| -----                                                                                         |                     |            |           |            |
| Total Orbital Interactions:                                                                   | -38.596403297164365 | -1050.2616 | -24219.61 | -101334.84 |
| -----                                                                                         |                     |            |           |            |
| Residu (E=Steric+OrbInt+Res):                                                                 | 0.000016407978253   | 0.0004     | 0.01      | 0.04       |
| -----                                                                                         |                     |            |           |            |
| Solvation Energy (el):                                                                        | -0.035593830133443  | -0.9686    | -22.34    | -93.45     |
| Dispersion Energy:                                                                            | -0.078080366396544  | -2.1247    | -49.00    | -205.00    |
| -----                                                                                         |                     |            |           |            |
| Post-SCF Solvation Energies                                                                   |                     |            |           |            |
| Solvation Energy (cd):                                                                        | 0.004964174249672   | 0.1351     | 3.12      | 13.03      |
| -----                                                                                         |                     |            |           |            |
| Total Bonding Energy:                                                                         | -9.420462449194975  | -256.3438  | -5911.43  | -24733.42  |
| -----                                                                                         |                     |            |           |            |
| Summary of Bonding Energy (energy terms are taken from the energy decomposition above)        |                     |            |           |            |
| =====                                                                                         |                     |            |           |            |
| Electrostatic Energy:                                                                         | -7.715163343534382  | -209.9403  | -4841.34  | -20256.16  |
| Kinetic Energy:                                                                               | 8.845087542143091   | 240.6871   | 5550.38   | 23222.77   |
| Coulomb (Steric+OrbInt) Energy:                                                               | -2.183686484804802  | -59.4211   | -1370.28  | -5733.27   |
| XC Energy:                                                                                    | -8.257990140718569  | -224.7113  | -5181.97  | -21681.35  |
| Solvation:                                                                                    | -0.030629655883771  | -0.8335    | -19.22    | -80.42     |
| Dispersion Energy:                                                                            | -0.078080366396544  | -2.1247    | -49.00    | -205.00    |
| -----                                                                                         |                     |            |           |            |
| Total Bonding Energy:                                                                         | -9.420462449194977  | -256.3438  | -5911.43  | -24733.42  |

F R A G M E N T E N E R G Y T E R M S \*\*\* (summed over all fragments) \*\*\*

The energy terms below are (parts of) the Total Energy of the fragments from which the molecule is built.

|                          |                      |            |            |            |
|--------------------------|----------------------|------------|------------|------------|
| Exchange and Correlation |                      |            |            |            |
| Exchange LDA:            | -256.380798736800898 | -6976.4765 | -160881.40 | -673127.69 |
| Exchange GGA:            | -22.918693271995100  | -623.6494  | -14381.70  | -60173.02  |
| Correlation LDA:         | -14.630517455362350  | -398.1166  | -9180.79   | -38412.42  |
| Correlation GGA:         | 6.964190613630675    | 189.5053   | 4370.10    | 18284.48   |
| -----                    |                      |            |            |            |
| Total XC:                | -286.965818850527683 | -7808.7372 | -180073.79 | -753428.65 |
| -----                    |                      |            |            |            |
| Intensities              |                      |            |            |            |
| =====                    |                      |            |            |            |

| Frequency<br>cm-1 | Dipole Strength<br>1e-40 esu2 cm2 | Absorption Intensity (degeneracy not counted)<br>km/mole |
|-------------------|-----------------------------------|----------------------------------------------------------|
| -----             | -----                             | -----                                                    |
| 13.078465         | 973.073028                        | 3.189924                                                 |
| 17.373846         | 34.590906                         | 0.150639                                                 |
| 45.207586         | 39.144268                         | 0.443565                                                 |
| 50.811063         | 108.135565                        | 1.377225                                                 |
| 54.745987         | 150.995713                        | 2.072025                                                 |
| 62.249750         | 16.268609                         | 0.253844                                                 |
| 71.006546         | 107.799838                        | 1.918645                                                 |
| 79.163017         | 39.007537                         | 0.774014                                                 |
| 79.823184         | 51.314128                         | 1.026701                                                 |
| 97.160026         | 21.791957                         | 0.530716                                                 |
| 100.439237        | 143.311858                        | 3.607976                                                 |
| 106.481614        | 169.518522                        | 4.524492                                                 |
| 149.049787        | 50.320221                         | 1.879975                                                 |
| 170.065756        | 3.265008                          | 0.139181                                                 |
| 180.178483        | 41.849619                         | 1.890047                                                 |
| 197.537808        | 56.370825                         | 2.791147                                                 |
| 209.632104        | 79.177808                         | 4.160441                                                 |
| 217.193339        | 16.734813                         | 0.911057                                                 |
| 279.803839        | 6.698024                          | 0.469763                                                 |
| 297.647992        | 800.394445                        | 59.715228                                                |

|             |             |             |
|-------------|-------------|-------------|
| 318.308391  | 18.416822   | 1.469403    |
| 327.382720  | 128.182805  | 10.518737   |
| 348.843512  | 105.791967  | 9.250419    |
| 387.040670  | 38.716955   | 3.756089    |
| 403.195772  | 5.576336    | 0.563564    |
| 424.937156  | 93.999452   | 10.012167   |
| 443.280025  | 195.376342  | 21.708420   |
| 447.555457  | 99.570409   | 11.170053   |
| 519.344809  | 183.322286  | 23.864324   |
| 524.993944  | 107.853420  | 14.192741   |
| 540.147100  | 97.986103   | 13.266446   |
| 572.995217  | 96.481638   | 13.857144   |
| 580.496923  | 271.734439  | 39.538726   |
| 601.851266  | 12.730769   | 1.920533    |
| 611.953653  | 1.532353    | 0.235047    |
| 622.339329  | 30.469304   | 4.753000    |
| 636.635572  | 2.460087    | 0.392572    |
| 668.737328  | 50.886095   | 8.529681    |
| 687.620970  | 642.549542  | 110.747467  |
| 738.021735  | 411.018640  | 76.034158   |
| 741.998894  | 192.333812  | 35.771485   |
| 745.736082  | 43.180638   | 8.071463    |
| 770.721151  | 115.143085  | 22.244017   |
| 773.790189  | 36.348179   | 7.049916    |
| 818.878760  | 48.531160   | 9.961353    |
| 825.177907  | 21.773808   | 4.503602    |
| 848.226915  | 412.271278  | 87.654294   |
| 863.682829  | 850.814212  | 184.190442  |
| 868.332202  | 102.496648  | 22.308668   |
| 870.456088  | 13.599595   | 2.967228    |
| 897.810788  | 67.128766   | 15.106768   |
| 903.424978  | 52.548218   | 11.899485   |
| 915.263664  | 1.796452    | 0.412135    |
| 924.347513  | 36.215836   | 8.390964    |
| 949.413466  | 1.482197    | 0.352728    |
| 952.588097  | 15.842108   | 3.782650    |
| 972.750023  | 4.951726    | 1.207358    |
| 978.508311  | 2.562883    | 0.628596    |
| 985.509476  | 13.879278   | 3.428513    |
| 990.251982  | 11.841659   | 2.939249    |
| 993.881119  | 229.640395  | 57.208531   |
| 1005.763502 | 41.798050   | 10.537315   |
| 1007.637083 | 42.272433   | 10.676759   |
| 1031.042111 | 1.310933    | 0.338794    |
| 1056.697491 | 70.115868   | 18.571418   |
| 1058.020628 | 57.373928   | 15.215520   |
| 1081.249460 | 11.868781   | 3.216696    |
| 1095.894067 | 7.509101    | 2.062693    |
| 1119.399789 | 8.992239    | 2.523081    |
| 1120.017358 | 14.962803   | 4.200643    |
| 1147.727946 | 4.830911    | 1.389780    |
| 1153.478428 | 17.623113   | 5.095305    |
| 1165.463935 | 26.353153   | 7.698560    |
| 1193.787604 | 47.517165   | 14.218561   |
| 1215.593050 | 55.321054   | 16.856085   |
| 1247.339139 | 20.523514   | 6.416739    |
| 1250.901237 | 51.009203   | 15.993725   |
| 1265.512387 | 49.953653   | 15.845711   |
| 1268.203311 | 13.240223   | 4.208838    |
| 1283.925773 | 9.930813    | 3.195971    |
| 1297.146901 | 5.166334    | 1.679770    |
| 1304.190258 | 20.938672   | 6.844916    |
| 1321.604980 | 6.205527    | 2.055694    |
| 1324.171716 | 52.099397   | 17.292392   |
| 1399.368839 | 63.595327   | 22.306708   |
| 1418.650524 | 33.719939   | 11.990582   |
| 1424.322903 | 45.001180   | 16.066099   |
| 1429.010023 | 32.780833   | 11.741764   |
| 1437.559165 | 40.935504   | 14.750405   |
| 1445.733385 | 15.329787   | 5.555234    |
| 1450.559273 | 264.950821  | 96.333828   |
| 1479.770741 | 12.406982   | 4.601916    |
| 1540.578442 | 69.880882   | 26.984866   |
| 1560.407258 | 6.204407    | 2.426701    |
| 1580.018248 | 73.677709   | 29.179395   |
| 1589.680906 | 22.708693   | 9.048574    |
| 1856.002578 | 813.285919  | 378.355367  |
| 1911.599467 | 3050.567202 | 1461.690982 |
| 1972.533207 | 2640.748439 | 1305.657973 |
| 2944.566929 | 39.093528   | 28.853890   |
| 2961.808397 | 40.268769   | 29.895332   |
| 2968.689898 | 29.167375   | 21.704023   |
| 2979.419759 | 44.905392   | 33.535768   |
| 3024.122013 | 5.130850    | 3.889257    |
| 3036.812600 | 24.920041   | 18.969016   |

Electronic Supplementary Information for Dalton Transactions  
This journal is © The Royal Society of Chemistry 2010

|             |           |           |
|-------------|-----------|-----------|
| 3047.390561 | 14.277944 | 10.906160 |
| 3055.067373 | 15.628864 | 11.968130 |
| 3089.479303 | 2.447205  | 1.895107  |
| 3093.170196 | 2.603651  | 2.018667  |
| 3101.811246 | 3.815402  | 2.966428  |
| 3104.865842 | 2.354731  | 1.832577  |
| 3113.511616 | 10.867155 | 8.480949  |
| 3118.742127 | 0.049849  | 0.038969  |
| 3124.369025 | 0.825726  | 0.646661  |
| 3139.988725 | 8.408333  | 6.617837  |
| 3156.453140 | 14.191605 | 11.228169 |

Zero-Point Energy : 0.305379 a.u.  
===== 8.309787 eV

P4

Geometry CYCLE 12  
 =====

Energy gradients wrt nuclear displacements  
 =====

| Atom  | Cartesian (a.u./angstrom) |           |           |
|-------|---------------------------|-----------|-----------|
|       | X                         | Y         | Z         |
| 1 O   | -0.000096                 | -0.000166 | -0.000031 |
| 2 O   | 0.000040                  | -0.000162 | 0.000018  |
| 3 C   | -0.000045                 | 0.000450  | 0.000254  |
| 4 C   | 0.000126                  | 0.000530  | 0.000124  |
| 5 H   | -0.000089                 | 0.000131  | 0.000040  |
| 6 Ru  | -0.000057                 | -0.000554 | -0.000903 |
| 7 C   | -0.000008                 | -0.000265 | -0.000123 |
| 8 H   | 0.000007                  | 0.000044  | 0.000006  |
| 9 N   | 0.000113                  | 0.000114  | 0.000135  |
| 10 H  | -0.000045                 | -0.000074 | 0.000032  |
| 11 C  | 0.000055                  | 0.000063  | 0.000018  |
| 12 C  | 0.000111                  | 0.000081  | 0.000068  |
| 13 C  | -0.000004                 | 0.000058  | -0.000136 |
| 14 C  | -0.000048                 | 0.000137  | -0.000116 |
| 15 C  | -0.000074                 | 0.000086  | -0.000023 |
| 16 C  | -0.000021                 | -0.000146 | -0.000058 |
| 17 C  | 0.000064                  | -0.000150 | -0.000025 |
| 18 C  | 0.000048                  | -0.000018 | 0.000132  |
| 19 H  | 0.000083                  | -0.000007 | 0.000027  |
| 20 H  | -0.000058                 | -0.000034 | -0.000040 |
| 21 C  | 0.000030                  | 0.000109  | 0.000046  |
| 22 H  | -0.000001                 | 0.000022  | 0.000098  |
| 23 C  | -0.000080                 | -0.000128 | -0.000010 |
| 24 H  | 0.000056                  | 0.000000  | -0.000013 |
| 25 H  | -0.000054                 | 0.000012  | -0.000042 |
| 26 Cl | -0.000154                 | -0.000048 | 0.000050  |
| 27 H  | 0.000219                  | 0.000018  | 0.000421  |
| 28 H  | -0.000119                 | -0.000103 | 0.000051  |

-----  
 Geometry Convergence after Step 12  
 -----

|                          |                     |            |   |
|--------------------------|---------------------|------------|---|
| current energy           | -6.79684192 Hartree |            |   |
| abs of energy change     | 0.00000483          | 0.00100000 | T |
| constrained gradient max | 0.00090278          | 0.00100000 | T |
| constrained gradient rms | 0.00017120          | 0.00066667 | T |
| gradient max             | 0.00090278          |            |   |
| gradient rms             | 0.00017120          |            |   |
| cart. step max           | 0.00581096          | 0.01000000 | T |
| cart. step rms           | 0.00124723          | 0.00666667 | T |

|                                                                 | hartree             | eV         | kcal/mol  | kJ/mol     |
|-----------------------------------------------------------------|---------------------|------------|-----------|------------|
|                                                                 | -----               | -----      | -----     | -----      |
| <b>Pauli Repulsion</b>                                          |                     |            |           |            |
| Kinetic (Delta T^0):                                            | 77.123609498182375  | 2098.6402  | 48395.80  | 202488.01  |
| Delta V^Pauli Coulomb:                                          | -39.915672308527448 | -1086.1607 | -25047.47 | -104798.58 |
| Delta V^Pauli LDA-XC:                                           | -9.539160298017411  | -259.5738  | -5985.91  | -25045.06  |
| Delta V^Pauli GGA-Exchange:                                     | 0.542125042290998   | 14.7520    | 340.19    | 1423.35    |
| Delta V^Pauli GGA-Correlation:                                  | -0.150407049092260  | -4.0928    | -94.38    | -394.89    |
| -----                                                           |                     |            |           |            |
| Total Pauli Repulsion:                                          | 28.060494884836253  | 763.5649   | 17608.23  | 73672.82   |
| (Total Pauli Repulsion =<br>Delta E^Pauli in BB paper)          |                     |            |           |            |
| <b>Steric Interaction</b>                                       |                     |            |           |            |
| Pauli Repulsion (Delta E^Pauli):                                | 28.060494884836253  | 763.5649   | 17608.23  | 73672.82   |
| Electrostatic Interaction:                                      | -5.925250022781407  | -161.2343  | -3718.15  | -15556.74  |
| (Electrostatic Interaction =<br>Delta V_elstat in the BB paper) |                     |            |           |            |
| -----                                                           |                     |            |           |            |
| Total Steric Interaction:                                       | 22.135244862054847  | 602.3307   | 13890.08  | 58116.08   |
| (Total Steric Interaction =<br>Delta E^0 in the BB paper)       |                     |            |           |            |
| <b>Orbital Interactions</b>                                     |                     |            |           |            |
| A:                                                              | -28.863499969291258 | -785.4158  | -18112.12 | -75781.11  |
| -----                                                           |                     |            |           |            |
| Total Orbital Interactions:                                     | -28.867231876942803 | -785.5173  | -18114.46 | -75790.91  |

Alternative Decomposition Orb.Int.



Electronic Supplementary Information for Dalton Transactions  
This journal is © The Royal Society of Chemistry 2010

|                               |                     |            |           |            |
|-------------------------------|---------------------|------------|-----------|------------|
| Kinetic:                      | -70.755195845497454 | -1925.3468 | -44399.56 | -185767.74 |
| Coulomb:                      | 38.623062539688227  | 1050.9870  | 24236.34  | 101404.84  |
| XC:                           | 3.264901428866414   | 88.8425    | 2048.76   | 8572.00    |
| -----                         |                     |            |           |            |
| Total Orbital Interactions:   | -28.867231876942814 | -785.5173  | -18114.46 | -75790.91  |
|                               |                     |            |           |            |
| Residu (E=Steric+OrbInt+Res): | -0.00000086530315   | 0.0000     | 0.00      | 0.00       |
|                               |                     |            |           |            |
| Solvation Energy (el):        | -0.023653528729480  | -0.6436    | -14.84    | -62.10     |
| Dispersion Energy:            | -0.045634428021853  | -1.2418    | -28.64    | -119.81    |
|                               |                     |            |           |            |
| Post-SCF Solvation Energies   |                     |            |           |            |
| Solvation Energy (cd):        | 0.004433335385971   | 0.1206     | 2.78      | 11.64      |
|                               |                     |            |           |            |
| Total Bonding Energy:         | -6.796841722783634  | -184.9515  | -4265.08  | -17845.11  |

Summary of Bonding Energy (energy terms are taken from the energy decomposition above)

|                                 |                    |           |          |           |
|---------------------------------|--------------------|-----------|----------|-----------|
| =====                           |                    |           |          |           |
| Electrostatic Energy:           | -5.925250022781407 | -161.2343 | -3718.15 | -15556.74 |
| Kinetic Energy:                 | 6.368413652684922  | 173.2934  | 3996.24  | 16720.27  |
| Coulomb (Steric+OrbInt) Energy: | -1.292609855369534 | -35.1737  | -811.13  | -3393.75  |
| XC Energy:                      | -5.882540875952259 | -160.0721 | -3691.35 | -15444.61 |
| Solvation:                      | -0.019220193343509 | -0.5230   | -12.06   | -50.46    |
| Dispersion Energy:              | -0.045634428021853 | -1.2418   | -28.64   | -119.81   |
| -----                           |                    |           |          |           |
| Total Bonding Energy:           | -6.796841722783641 | -184.9515 | -4265.08 | -17845.11 |

F R A G M E N T E N E R G Y T E R M S \*\*\* (summed over all fragments) \*\*\*

The energy terms below are (parts of) the Total Energy of the fragments from which the molecule is built.

|                          |                      |            |            |            |
|--------------------------|----------------------|------------|------------|------------|
| Exchange and Correlation |                      |            |            |            |
| Exchange LDA:            | -230.014124633296035 | -6259.0028 | -144336.06 | -603902.00 |
| Exchange GGA:            | -19.441423369082109  | -529.0280  | -12199.68  | -51043.45  |
| Correlation LDA:         | -12.269000534921709  | -333.8565  | -7698.91   | -32212.26  |
| Correlation GGA:         | 5.709988502065416    | 155.3767   | 3583.07    | 14991.57   |
| -----                    |                      |            |            |            |
| Total XC:                | -256.014560035234467 | -6966.5106 | -160651.58 | -672166.13 |

Intensities

=====

| Frequency<br>cm-1 | Dipole Strength<br>1e-40 esu <sup>2</sup> cm <sup>2</sup> | Absorption Intensity (degeneracy not counted)<br>km/mole |
|-------------------|-----------------------------------------------------------|----------------------------------------------------------|
| -----             | -----                                                     | -----                                                    |
| 34.710496         | 236.061022                                                | 2.053824                                                 |
| 47.541324         | 48.018931                                                 | 0.572218                                                 |
| 66.367805         | 116.521319                                                | 1.938389                                                 |
| 77.983539         | 34.346756                                                 | 0.671377                                                 |
| 83.754745         | 13.390034                                                 | 0.281105                                                 |
| 92.967081         | 11.017515                                                 | 0.256738                                                 |
| 103.923160        | 4.732819                                                  | 0.123285                                                 |
| 125.432178        | 349.127585                                                | 10.976685                                                |
| 181.527875        | 101.817282                                                | 4.632793                                                 |
| 196.553642        | 15.127026                                                 | 0.745268                                                 |
| 220.492981        | 471.481650                                                | 26.057793                                                |
| 249.570506        | 40.921371                                                 | 2.559891                                                 |
| 270.938540        | 329.658090                                                | 22.387861                                                |
| 292.919347        | 306.889587                                                | 22.532443                                                |
| 338.486907        | 14.199423                                                 | 1.204733                                                 |
| 367.197278        | 24.868340                                                 | 2.288887                                                 |
| 373.976173        | 255.382211                                                | 23.939366                                                |
| 385.027202        | 219.001353                                                | 21.135683                                                |
| 416.316406        | 156.849196                                                | 16.367558                                                |
| 442.374679        | 35.977717                                                 | 3.989348                                                 |
| 464.104281        | 200.997876                                                | 23.382186                                                |
| 465.773104        | 27.690652                                                 | 3.232851                                                 |
| 485.509779        | 192.057848                                                | 23.372658                                                |
| 497.597747        | 19.537972                                                 | 2.436890                                                 |
| 530.764978        | 110.417817                                                | 14.689922                                                |
| 550.308011        | 29.502946                                                 | 4.069577                                                 |
| 578.143707        | 505.712659                                                | 73.285440                                                |
| 595.713289        | 657.153472                                                | 98.125564                                                |
| 620.541829        | 84.125299                                                 | 13.085061                                                |
| 632.210251        | 343.655347                                                | 54.458128                                                |
| 639.145014        | 72.806338                                                 | 11.663977                                                |
| 654.847473        | 4.110593                                                  | 0.674719                                                 |

Electronic Supplementary Information for Dalton Transactions  
This journal is © The Royal Society of Chemistry 2010

|             |             |             |
|-------------|-------------|-------------|
| 710.029905  | 95.500929   | 16.996610   |
| 720.661902  | 339.174635  | 61.267901   |
| 736.906799  | 727.760605  | 134.424731  |
| 749.757008  | 1.436420    | 0.269948    |
| 780.316154  | 15.196787   | 2.972353    |
| 843.029308  | 1.611174    | 0.340458    |
| 864.263765  | 3.376017    | 0.731356    |
| 916.949193  | 201.265591  | 46.258642   |
| 922.823948  | 4.675612    | 1.081522    |
| 959.849173  | 2.464046    | 0.592830    |
| 961.926420  | 4.022418    | 0.969856    |
| 977.963063  | 0.217652    | 0.053354    |
| 993.272484  | 15.689877   | 3.906304    |
| 1000.583904 | 163.179142  | 40.925710   |
| 1011.120867 | 11.753233   | 2.978780    |
| 1039.353254 | 3.034859    | 0.790642    |
| 1045.871183 | 122.046468  | 31.994953   |
| 1085.793091 | 11.064228   | 3.011246    |
| 1096.345985 | 21.891098   | 6.015798    |
| 1121.032581 | 23.729751   | 6.667906    |
| 1137.431213 | 34.808818   | 9.924131    |
| 1232.021169 | 49.021813   | 15.138596   |
| 1261.087624 | 84.239703   | 26.628099   |
| 1278.204652 | 38.431910   | 12.313186   |
| 1299.028877 | 61.768558   | 20.112420   |
| 1309.447050 | 83.120011   | 27.281711   |
| 1400.148352 | 148.153371  | 51.995249   |
| 1415.792070 | 83.143875   | 29.505828   |
| 1431.847887 | 138.016317  | 49.534227   |
| 1436.261263 | 2.483616    | 0.894120    |
| 1461.403884 | 470.701455  | 172.422472  |
| 1532.707512 | 59.275110   | 22.772448   |
| 1545.328661 | 111.991977  | 43.379630   |
| 1563.010221 | 156.783060  | 61.424132   |
| 1587.073331 | 255.513811  | 101.645801  |
| 1937.613870 | 3083.730818 | 1497.689434 |
| 2011.062833 | 2253.221811 | 1135.815148 |
| 3083.588979 | 2.808066    | 2.170410    |
| 3097.720739 | 3.529247    | 2.740327    |
| 3101.229984 | 18.198982   | 14.146830   |
| 3104.868746 | 67.067932   | 52.195881   |
| 3108.422115 | 3.826062    | 2.981055    |
| 3111.167359 | 29.473304   | 22.984246   |
| 3129.526766 | 3.477129    | 2.727580    |
| 3137.636268 | 0.623680    | 0.490504    |
| 3468.484151 | 12.935353   | 11.245948   |

Zero-Point Energy : 0.188638 a.u.  
===== 5.133112 eV

P4'

Geometry CYCLE 14

=====

Energy gradients wrt nuclear displacements

=====

| Atom | Cartesian (a.u./angstrom) |           |           |
|------|---------------------------|-----------|-----------|
|      | X                         | Y         | Z         |
| 1 O  | 0.000000                  | -0.000014 | -0.000033 |
| 2 O  | 0.000076                  | 0.000025  | 0.000106  |
| 3 C  | -0.000019                 | 0.000226  | 0.000027  |
| 4 C  | -0.000268                 | -0.000223 | -0.000074 |
| 5 Ru | 0.000153                  | -0.000187 | 0.000228  |
| 6 Cl | 0.000036                  | 0.000042  | -0.000072 |
| 7 H  | -0.000022                 | -0.000045 | -0.000031 |
| 8 O  | 0.000133                  | 0.000060  | -0.000305 |
| 9 C  | -0.000343                 | 0.000009  | 0.000149  |
| 10 C | 0.000071                  | -0.000045 | -0.000111 |
| 11 C | -0.000030                 | -0.000007 | -0.000081 |
| 12 C | 0.000141                  | 0.000144  | 0.000159  |
| 13 H | -0.000008                 | -0.000046 | 0.000001  |
| 14 H | 0.000068                  | -0.000013 | 0.000016  |
| 15 H | -0.000057                 | 0.000029  | -0.000006 |
| 16 H | 0.000059                  | 0.000029  | -0.000023 |
| 17 H | -0.000036                 | -0.000004 | -0.000010 |
| 18 H | -0.000007                 | -0.000015 | -0.000009 |
| 19 H | 0.000004                  | 0.000001  | 0.000027  |
| 20 H | -0.000011                 | -0.000044 | -0.000010 |
| 21 O | 0.000046                  | -0.000009 | 0.000027  |
| 22 C | -0.000049                 | 0.000075  | 0.000073  |
| 23 C | 0.000021                  | -0.000070 | -0.000098 |
| 24 C | 0.000027                  | 0.000031  | 0.000046  |
| 25 C | -0.000035                 | -0.000066 | -0.000009 |
| 26 H | 0.000023                  | 0.000033  | -0.000014 |
| 27 H | 0.000026                  | 0.000021  | -0.000043 |
| 28 H | 0.000021                  | -0.000060 | 0.000015  |
| 29 H | -0.000012                 | 0.000040  | 0.000050  |
| 30 H | -0.000027                 | 0.000068  | -0.000016 |
| 31 H | 0.000007                  | -0.000018 | -0.000032 |
| 32 H | -0.000009                 | 0.000026  | 0.000021  |
| 33 H | 0.000023                  | 0.000006  | 0.000032  |

-----  
 Geometry Convergence after Step 14

|                          |                     |            |   |
|--------------------------|---------------------|------------|---|
| current energy           | -6.94162867 Hartree |            |   |
| abs of energy change     | 0.00000809          | 0.00100000 | T |
| constrained gradient max | 0.00034318          | 0.00100000 | T |
| constrained gradient rms | 0.00008710          | 0.00066667 | T |
| gradient max             | 0.00034318          |            |   |
| gradient rms             | 0.00008710          |            |   |
| cart. step max           | 0.00254932          | 0.01000000 | T |
| cart. step rms           | 0.00086827          | 0.00666667 | T |

|                                                                 | hartree             | eV        | kcal/mol  | kJ/mol    |
|-----------------------------------------------------------------|---------------------|-----------|-----------|-----------|
| -----                                                           |                     |           |           |           |
| Pauli Repulsion                                                 |                     |           |           |           |
| Kinetic (Delta T^0):                                            | 69.047565868834511  | 1878.8799 | 43328.01  | 181284.36 |
| Delta V^Pauli Coulomb:                                          | -36.505541946131878 | -993.3663 | -22907.58 | -95845.29 |
| Delta V^Pauli LDA-XC:                                           | -8.923359589595830  | -242.8170 | -5599.49  | -23428.28 |
| Delta V^Pauli GGA-Exchange:                                     | 0.572855365846699   | 15.5882   | 359.47    | 1504.03   |
| Delta V^Pauli GGA-Correlation:                                  | -0.179752862438548  | -4.8913   | -112.80   | -471.94   |
| -----                                                           |                     |           |           |           |
| Total Pauli Repulsion:                                          | 24.011766836514955  | 653.3934  | 15067.61  | 63042.88  |
| (Total Pauli Repulsion =<br>Delta E^Pauli in BB paper)          |                     |           |           |           |
| Steric Interaction                                              |                     |           |           |           |
| Pauli Repulsion (Delta E^Pauli):                                | 24.011766836514955  | 653.3934  | 15067.61  | 63042.88  |
| Electrostatic Interaction:                                      | -5.211050656519714  | -141.7999 | -3269.98  | -13681.61 |
| (Electrostatic Interaction =<br>Delta V_elstat in the BB paper) |                     |           |           |           |
| -----                                                           |                     |           |           |           |
| Total Steric Interaction:                                       | 18.800716179995241  | 511.5935  | 11797.63  | 49361.27  |
| (Total Steric Interaction =<br>Delta E^0 in the BB paper)       |                     |           |           |           |

Electronic Supplementary Information for Dalton Transactions  
This journal is © The Royal Society of Chemistry 2010

|                                    |                     |            |           |            |
|------------------------------------|---------------------|------------|-----------|------------|
| Orbital Interactions               |                     |            |           |            |
| A:                                 | -25.660068067771761 | -698.2460  | -16101.94 | -67370.50  |
|                                    | -----               | -----      | -----     | -----      |
| Total Orbital Interactions:        | -25.662042619927533 | -698.2997  | -16103.18 | -67375.68  |
| Alternative Decomposition Orb.Int. |                     |            |           |            |
| Kinetic:                           | -62.590445175154322 | -1703.1727 | -39276.10 | -164331.19 |
| Coulomb:                           | 34.406234870718350  | 936.2413   | 21590.24  | 90333.56   |
| XC:                                | 2.522167684508428   | 68.6317    | 1582.68   | 6621.95    |
|                                    | -----               | -----      | -----     | -----      |
| Total Orbital Interactions:        | -25.662042619927544 | -698.2997  | -16103.18 | -67375.68  |
| Residu (E=Steric+OrbInt+Res):      | 0.000000134464032   | 0.0000     | 0.00      | 0.00       |
| Solvation Energy (el):             | -0.024821998188544  | -0.6754    | -15.58    | -65.17     |
| Dispersion Energy:                 | -0.059888927670338  | -1.6297    | -37.58    | -157.24    |
| Post-SCF Solvation Energies        |                     |            |           |            |
| Solvation Energy (cd):             | 0.004407846187832   | 0.1199     | 2.77      | 11.57      |
| Total Bonding Energy:              | -6.941629385139309  | -188.8913  | -4355.94  | -18225.25  |

Summary of Bonding Energy (energy terms are taken from the energy decomposition above)

|                                 |                    |           |          |           |
|---------------------------------|--------------------|-----------|----------|-----------|
| =====                           |                    |           |          |           |
| Electrostatic Energy:           | -5.211050656519714 | -141.7999 | -3269.98 | -13681.61 |
| Kinetic Energy:                 | 6.457120693680189  | 175.7072  | 4051.90  | 16953.17  |
| Coulomb (Steric+OrbInt) Energy: | -2.099306940949496 | -57.1250  | -1317.34 | -5511.73  |
| XC Energy:                      | -6.008089401679250 | -163.4884 | -3770.13 | -15774.24 |
| Solvation:                      | -0.020414152000711 | -0.5555   | -12.81   | -53.60    |
| Dispersion Energy:              | -0.059888927670338 | -1.6297   | -37.58   | -157.24   |
|                                 | -----              | -----     | -----    | -----     |
| Total Bonding Energy:           | -6.941629385139322 | -188.8913 | -4355.94 | -18225.25 |

FRAGMENT ENERGY TERMS \*\*\* (summed over all fragments) \*\*\*

The energy terms below are (parts of) the Total Energy of the fragments from which the molecule is built.

|                          |                      |            |            |            |
|--------------------------|----------------------|------------|------------|------------|
| Exchange and Correlation |                      |            |            |            |
| Exchange LDA:            | -227.053057340647797 | -6178.4281 | -142477.96 | -596127.72 |
| Exchange GGA:            | -18.980968726729962  | -516.4984  | -11910.74  | -49834.53  |
| Correlation LDA:         | -12.067984619475835  | -328.3866  | -7572.78   | -31684.49  |
| Correlation GGA:         | 5.593849268109887    | 152.2164   | 3510.19    | 14686.65   |
|                          | -----                | -----      | -----      | -----      |
| Total XC:                | -252.508161418743697 | -6871.0967 | -158451.28 | -662960.08 |

Intensities  
=====

| Frequency<br>cm-1 | Dipole Strength<br>1e-40 esu2 cm2 | Absorption Intensity (degeneracy not counted)<br>km/mole |
|-------------------|-----------------------------------|----------------------------------------------------------|
| -----             | -----                             | -----                                                    |
| 42.293442         | 207.758100                        | 2.202465                                                 |
| 53.546357         | 17.854378                         | 0.239636                                                 |
| 60.593214         | 204.010332                        | 3.098519                                                 |
| 65.579218         | 108.055298                        | 1.776194                                                 |
| 75.799654         | 53.727194                         | 1.020797                                                 |
| 82.397865         | 85.568061                         | 1.767281                                                 |
| 96.637620         | 51.773669                         | 1.254103                                                 |
| 104.052576        | 17.447988                         | 0.455068                                                 |
| 115.320366        | 177.693615                        | 5.136365                                                 |
| 160.501134        | 18.454939                         | 0.742453                                                 |
| 173.030347        | 28.607176                         | 1.240724                                                 |
| 186.851614        | 22.610537                         | 1.058975                                                 |
| 200.867538        | 11.498832                         | 0.578951                                                 |
| 209.948484        | 105.185824                        | 5.535387                                                 |
| 225.731238        | 22.232450                         | 1.257932                                                 |
| 303.273596        | 527.922687                        | 40.131279                                                |
| 320.659830        | 390.797968                        | 31.410505                                                |
| 333.908942        | 380.742280                        | 31.866710                                                |
| 375.518144        | 60.518367                         | 5.696344                                                 |
| 418.849891        | 187.801615                        | 19.716771                                                |
| 440.138229        | 67.931582                         | 7.494435                                                 |
| 538.109304        | 156.817863                        | 21.151643                                                |
| 563.171032        | 65.496272                         | 9.245597                                                 |
| 573.047014        | 0.970425                          | 0.139390                                                 |
| 577.625202        | 295.255299                        | 42.748601                                                |

Electronic Supplementary Information for Dalton Transactions  
This journal is © The Royal Society of Chemistry 2010

|             |             |             |
|-------------|-------------|-------------|
| 608.608735  | 12.787340   | 1.950727    |
| 650.829860  | 81.987183   | 13.374930   |
| 688.262196  | 73.475795   | 12.675826   |
| 767.760047  | 18.754322   | 3.609150    |
| 777.381836  | 56.908836   | 11.088994   |
| 810.938188  | 96.569137   | 19.629271   |
| 819.687609  | 218.318409  | 44.855613   |
| 823.793739  | 82.821618   | 17.101739   |
| 832.685801  | 849.530840  | 177.312102  |
| 859.501008  | 817.183088  | 176.053162  |
| 864.532055  | 55.592695   | 12.046944   |
| 870.690355  | 7.260033    | 1.584457    |
| 879.122462  | 15.041322   | 3.314465    |
| 904.303794  | 4.973929    | 1.127436    |
| 911.376026  | 7.270928    | 1.660984    |
| 924.904109  | 42.833569   | 9.930224    |
| 927.568333  | 28.012590   | 6.512943    |
| 979.977402  | 151.107916  | 37.117725   |
| 985.939286  | 324.528159  | 80.201156   |
| 1004.045944 | 37.349400   | 9.399728    |
| 1009.561368 | 53.101030   | 13.437353   |
| 1095.305852 | 6.251588    | 1.716342    |
| 1098.858484 | 11.853569   | 3.264893    |
| 1147.491874 | 19.380909   | 5.574447    |
| 1157.968135 | 21.263183   | 6.171674    |
| 1162.442539 | 24.735717   | 7.207324    |
| 1170.610348 | 10.866822   | 3.188548    |
| 1183.115110 | 22.261982   | 6.601899    |
| 1201.670019 | 50.923157   | 15.338349   |
| 1213.506743 | 47.130523   | 14.335819   |
| 1224.896307 | 20.316345   | 6.237678    |
| 1252.978475 | 22.003457   | 6.910550    |
| 1262.744477 | 21.731365   | 6.878291    |
| 1267.305275 | 0.654584    | 0.207934    |
| 1268.706718 | 4.530308    | 1.440678    |
| 1304.503237 | 11.652209   | 3.810057    |
| 1311.566409 | 49.606136   | 16.308114   |
| 1325.096326 | 23.389709   | 7.768736    |
| 1332.625231 | 22.984683   | 7.677585    |
| 1412.095134 | 20.517135   | 7.262042    |
| 1418.775269 | 11.073696   | 3.938078    |
| 1428.013144 | 29.182072   | 10.445432   |
| 1430.604684 | 32.633005   | 11.701857   |
| 1436.817325 | 1.043915    | 0.375963    |
| 1443.101397 | 8.700874    | 3.147298    |
| 1447.314622 | 23.605396   | 8.563520    |
| 1454.153900 | 16.031471   | 5.843349    |
| 1854.223826 | 1156.183151 | 537.361891  |
| 1914.161642 | 2694.105417 | 1292.621171 |
| 1977.697461 | 2614.083132 | 1295.857722 |
| 2953.881507 | 30.691069   | 22.723915   |
| 2958.984431 | 20.035199   | 14.859850   |
| 2962.306652 | 43.988977   | 32.662690   |
| 2967.637442 | 33.554093   | 24.959415   |
| 2969.465580 | 29.397745   | 21.881162   |
| 2972.200345 | 19.660207   | 14.646850   |
| 2978.706773 | 31.088674   | 23.211757   |
| 2981.017431 | 62.558997   | 46.744699   |
| 3019.122540 | 4.551934    | 3.444727    |
| 3022.117511 | 6.496637    | 4.921279    |
| 3030.625196 | 3.135172    | 2.381616    |
| 3032.521041 | 14.345130   | 10.904013   |
| 3039.872444 | 24.899275   | 18.972306   |
| 3050.168864 | 15.790992   | 12.072893   |
| 3050.926442 | 25.914410   | 19.817603   |
| 3062.052041 | 12.049284   | 9.248086    |

Zero-Point Energy : 0.253899 a.u.  
===== 6.908950 eV

TS1

Geometry CYCLE 56  
 =====

Energy gradients wrt nuclear displacements  
 =====

| Atom  | Cartesian (a.u./angstrom) |           |           |
|-------|---------------------------|-----------|-----------|
|       | X                         | Y         | Z         |
| 1 O   | -0.000026                 | -0.000525 | 0.000028  |
| 2 O   | -0.000368                 | 0.000442  | 0.000058  |
| 3 C   | 0.000338                  | 0.000606  | -0.000196 |
| 4 C   | 0.000282                  | -0.000840 | 0.000335  |
| 5 H   | -0.000023                 | 0.000115  | 0.000091  |
| 6 Ru  | -0.000167                 | 0.000146  | -0.000764 |
| 7 C   | 0.000026                  | 0.000012  | 0.000082  |
| 8 H   | -0.000035                 | -0.000010 | -0.000017 |
| 9 N   | -0.000083                 | 0.000534  | -0.000194 |
| 10 H  | -0.000027                 | 0.000166  | 0.000158  |
| 11 C  | 0.000021                  | 0.000061  | -0.000092 |
| 12 C  | -0.000079                 | -0.000038 | 0.000695  |
| 13 C  | 0.000090                  | -0.000008 | -0.000092 |
| 14 C  | 0.000008                  | 0.000091  | 0.000003  |
| 15 C  | -0.000131                 | -0.000070 | 0.000110  |
| 16 C  | 0.000080                  | -0.000100 | 0.000080  |
| 17 C  | -0.000043                 | -0.000060 | 0.000007  |
| 18 C  | 0.000120                  | 0.000112  | -0.000110 |
| 19 H  | 0.000063                  | 0.000047  | -0.000013 |
| 20 H  | -0.000081                 | -0.000124 | -0.000089 |
| 21 C  | -0.000003                 | 0.000014  | -0.000138 |
| 22 H  | -0.000114                 | -0.000057 | -0.000023 |
| 23 C  | -0.000021                 | -0.000043 | -0.000054 |
| 24 H  | 0.000022                  | -0.000045 | 0.000031  |
| 25 H  | 0.000005                  | 0.000039  | -0.000111 |
| 26 Cl | 0.000089                  | -0.000231 | 0.000307  |
| 27 N  | 0.000110                  | -0.000199 | 0.000193  |
| 28 H  | 0.000040                  | 0.000012  | 0.000037  |
| 29 H  | -0.000047                 | 0.000073  | 0.000041  |
| 30 H  | -0.000120                 | -0.000234 | -0.000059 |
| 31 B  | 0.000948                  | -0.000646 | -0.000038 |
| 32 H  | -0.000158                 | 0.000110  | -0.000201 |
| 33 H  | -0.000737                 | 0.000486  | -0.000017 |
| 34 H  | 0.000020                  | 0.000166  | -0.000047 |

-----  
 Geometry Convergence after Step 56  
 -----

|                          |                     |            |   |
|--------------------------|---------------------|------------|---|
| current energy           | -7.88183747 Hartree |            |   |
| abs of energy change     | 0.00001377          | 0.00100000 | T |
| constrained gradient max | 0.00094778          | 0.00100000 | T |
| constrained gradient rms | 0.00024923          | 0.00066667 | T |
| gradient max             | 0.00094778          |            |   |
| gradient rms             | 0.00024923          |            |   |
| cart. step max           | 0.00687972          | 0.01000000 | T |
| cart. step rms           | 0.00260610          | 0.00666667 | T |

|                                                                 | hartree             | eV         | kcal/mol  | kJ/mol     |
|-----------------------------------------------------------------|---------------------|------------|-----------|------------|
| -----                                                           |                     |            |           |            |
| Pauli Repulsion                                                 |                     |            |           |            |
| Kinetic (Delta T^0):                                            | 86.280597247238134  | 2347.8145  | 54141.90  | 226529.68  |
| Delta V^Pauli Coulomb:                                          | -44.165690594529778 | -1201.8096 | -27714.39 | -115957.00 |
| Delta V^Pauli LDA-XC:                                           | -10.858181814007342 | -295.4662  | -6813.61  | -28508.15  |
| Delta V^Pauli GGA-Exchange:                                     | 0.612065446041431   | 16.6551    | 384.08    | 1606.98    |
| Delta V^Pauli GGA-Correlation:                                  | -0.169091421723855  | -4.6012    | -106.11   | -443.95    |
| -----                                                           |                     |            |           |            |
| Total Pauli Repulsion:                                          | 31.699698863018590  | 862.5927   | 19891.86  | 83227.55   |
| (Total Pauli Repulsion =<br>Delta E^Pauli in BB paper)          |                     |            |           |            |
| Steric Interaction                                              |                     |            |           |            |
| Pauli Repulsion (Delta E^Pauli):                                | 31.699698863018590  | 862.5927   | 19891.86  | 83227.55   |
| Electrostatic Interaction:                                      | -6.607050054129642  | -179.7870  | -4145.99  | -17346.81  |
| (Electrostatic Interaction =<br>Delta V_elstat in the BB paper) |                     |            |           |            |
| -----                                                           |                     |            |           |            |
| Total Steric Interaction:                                       | 25.09264880888946   | 682.8057   | 15745.88  | 65880.74   |

(Total Steric Interaction =  
 Delta E^0 in the BB paper)

|                                    |                     |            |           |            |
|------------------------------------|---------------------|------------|-----------|------------|
| Orbital Interactions               |                     |            |           |            |
| A:                                 | -32.877952320340270 | -894.6546  | -20631.23 | -86321.05  |
|                                    | -----               | -----      | -----     | -----      |
| Total Orbital Interactions:        | -32.881688552911896 | -894.7563  | -20633.57 | -86330.86  |
| Alternative Decomposition Orb.Int. |                     |            |           |            |
| Kinetic:                           | -78.936062856570857 | -2147.9596 | -49533.13 | -207246.60 |
| Coulomb:                           | 42.499084350506450  | 1156.4589  | 26668.58  | 111581.33  |
| XC:                                | 3.555289953152499   | 96.7444    | 2230.98   | 9334.41    |
|                                    | -----               | -----      | -----     | -----      |
| Total Orbital Interactions:        | -32.881688552911911 | -894.7563  | -20633.57 | -86330.86  |
| Residu (E=Steric+OrbInt+Res):      | -0.000002965701866  | -0.0001    | 0.00      | -0.01      |
| Solvation Energy (el):             | -0.032566181550544  | -0.8862    | -20.44    | -85.50     |
| Dispersion Energy:                 | -0.064898199046327  | -1.7660    | -40.72    | -170.39    |
| Post-SCF Solvation Energies        |                     |            |           |            |
| Solvation Energy (cd):             | 0.004666956783644   | 0.1270     | 2.93      | 12.25      |
| Total Bonding Energy:              | -7.881840133538044  | -214.4758  | -4945.93  | -20693.77  |

Summary of Bonding Energy (energy terms are taken from the energy decomposition above)

|                                 |                    |           |          |           |
|---------------------------------|--------------------|-----------|----------|-----------|
| Electrostatic Energy:           | -6.607050054129642 | -179.7870 | -4145.99 | -17346.81 |
| Kinetic Energy:                 | 7.344534390667278  | 199.8549  | 4608.77  | 19283.07  |
| Coulomb (Steric+OrbInt) Energy: | -1.666609209725195 | -45.3507  | -1045.81 | -4375.68  |
| XC Energy:                      | -6.859917836537266 | -186.6679 | -4304.66 | -18010.71 |
| Solvation:                      | -0.027899224766901 | -0.7592   | -17.51   | -73.25    |
| Dispersion Energy:              | -0.064898199046327 | -1.7660   | -40.72   | -170.39   |
|                                 | -----              | -----     | -----    | -----     |
| Total Bonding Energy:           | -7.881840133538054 | -214.4758 | -4945.93 | -20693.77 |

FRAGMENT ENERGY TERMS \*\*\* (summed over all fragments) \*\*\*

The energy terms below are (parts of) the Total Energy of the fragments from which the molecule is built.

|                          |                      |            |            |            |
|--------------------------|----------------------|------------|------------|------------|
| Exchange and Correlation |                      |            |            |            |
| Exchange LDA:            | -239.772747576091319 | -6524.5484 | -150459.69 | -629523.26 |
| Exchange GGA:            | -20.772135849882787  | -565.2386  | -13034.71  | -54537.23  |
| Correlation LDA:         | -13.181966062016789  | -358.6995  | -8271.81   | -34609.25  |
| Correlation GGA:         | 6.202774550181566    | 168.7861   | 3892.30    | 16285.38   |
|                          | -----                | -----      | -----      | -----      |
| Total XC:                | -267.524074937809303 | -7279.7005 | -167873.91 | -702384.36 |

Intensities

=====

| Frequency<br>cm-1 | Dipole Strength<br>1e-40 esu2 cm2 | Absorption Intensity (degeneracy not counted)<br>km/mole |
|-------------------|-----------------------------------|----------------------------------------------------------|
| -----             | -----                             | -----                                                    |
| -340.986765       | 4197.413603                       | -358.754501                                              |
| 31.813326         | 86.661819                         | 0.691059                                                 |
| 37.911637         | 110.291128                        | 1.048072                                                 |
| 57.024493         | 122.565988                        | 1.751901                                                 |
| 64.740869         | 70.091004                         | 1.137415                                                 |
| 75.668355         | 80.288219                         | 1.522805                                                 |
| 81.005920         | 38.349369                         | 0.778669                                                 |
| 91.630107         | 124.239457                        | 2.853486                                                 |
| 98.187227         | 372.561018                        | 9.169180                                                 |
| 113.688249        | 355.099617                        | 10.119146                                                |
| 117.646434        | 152.961465                        | 4.510647                                                 |
| 130.233552        | 212.396142                        | 6.933421                                                 |
| 140.846428        | 122.806752                        | 4.335570                                                 |
| 189.984121        | 78.719066                         | 3.748654                                                 |
| 200.228831        | 98.391472                         | 4.938126                                                 |
| 243.594132        | 99.298156                         | 6.062979                                                 |
| 261.672927        | 267.934269                        | 17.573778                                                |
| 298.627680        | 1156.259174                       | 86.549253                                                |
| 307.379638        | 225.988392                        | 17.411625                                                |
| 331.997586        | 86.246598                         | 7.177199                                                 |
| 375.845804        | 62.974351                         | 5.932688                                                 |
| 391.015732        | 163.588202                        | 16.033350                                                |
| 411.607868        | 43.249708                         | 4.462158                                                 |
| 430.647009        | 21.917292                         | 2.365846                                                 |

|             |             |             |
|-------------|-------------|-------------|
| 449.801485  | 69.390151   | 7.823423    |
| 459.142124  | 17.676656   | 2.034348    |
| 479.746528  | 476.942164  | 57.352933   |
| 492.718763  | 57.209862   | 7.065584    |
| 503.821835  | 247.114788  | 31.207127   |
| 518.299060  | 103.194373  | 13.406472   |
| 541.856730  | 4.116933    | 0.559160    |
| 557.481464  | 215.650950  | 30.134215   |
| 575.736016  | 557.216243  | 80.412810   |
| 605.490527  | 661.771322  | 100.436915  |
| 613.950680  | 91.625777   | 14.100328   |
| 619.698252  | 118.486192  | 18.404587   |
| 645.223488  | 27.031096   | 4.371715    |
| 709.176554  | 141.284928  | 25.114716   |
| 718.000041  | 69.969813   | 12.592537   |
| 728.494852  | 385.993692  | 70.483062   |
| 739.049524  | 551.751061  | 102.210330  |
| 742.030743  | 120.306062  | 22.376259   |
| 778.241148  | 31.647444   | 6.173492    |
| 788.664304  | 456.429967  | 90.228639   |
| 862.580826  | 15.082149   | 3.260927    |
| 872.359592  | 25.618270   | 5.601746    |
| 877.085211  | 1527.431636 | 335.800733  |
| 934.697044  | 1057.681919 | 247.801551  |
| 945.827176  | 32.801194   | 7.776416    |
| 951.707011  | 5.828638    | 1.390428    |
| 960.642793  | 999.764828  | 240.734233  |
| 977.709060  | 6.559516    | 1.607532    |
| 978.932705  | 5.066898    | 1.243292    |
| 992.791224  | 20.643595   | 5.137139    |
| 1008.593504 | 9.891291    | 2.500617    |
| 1017.567088 | 236.356142  | 60.284826   |
| 1033.337661 | 114.703412  | 29.709590   |
| 1042.899869 | 170.049668  | 44.452529   |
| 1069.843718 | 153.005262  | 41.030308   |
| 1078.714317 | 20.826670   | 5.631244    |
| 1088.566121 | 88.457417   | 24.136102   |
| 1110.186586 | 1278.833032 | 355.867143  |
| 1117.545675 | 30.097589   | 8.430922    |
| 1123.391547 | 17.933465   | 5.049791    |
| 1176.283373 | 548.910533  | 161.842133  |
| 1183.471476 | 26.989619   | 8.006314    |
| 1251.178514 | 12.880796   | 4.039616    |
| 1272.540037 | 13.292906   | 4.240035    |
| 1291.636265 | 101.310223  | 32.799828   |
| 1300.842697 | 102.951845  | 33.568890   |
| 1353.801396 | 174.226755  | 59.121831   |
| 1399.451427 | 88.000202   | 30.868787   |
| 1425.682126 | 74.406291   | 26.589516   |
| 1441.148290 | 395.934137  | 143.024253  |
| 1467.232740 | 32.048563   | 11.786521   |
| 1531.429610 | 18.143394   | 6.964559    |
| 1532.657287 | 132.039750  | 50.725673   |
| 1545.656474 | 13.509865   | 5.234100    |
| 1563.766677 | 142.736656  | 55.948126   |
| 1585.075233 | 73.399729   | 29.162342   |
| 1735.624866 | 3905.594608 | 1699.108437 |
| 1885.301889 | 1215.754020 | 574.519385  |
| 1945.562176 | 5013.303628 | 2444.821706 |
| 1991.133429 | 3958.374575 | 1975.583191 |
| 2424.779778 | 337.487081  | 205.119772  |
| 2452.670213 | 467.931182  | 287.673074  |
| 3098.320947 | 0.161525    | 0.125442    |
| 3101.796853 | 0.359171    | 0.279250    |
| 3109.265833 | 1.247052    | 0.971897    |
| 3111.800794 | 4.036576    | 3.148495    |
| 3118.787459 | 14.829607   | 11.592937   |
| 3121.056943 | 7.143320    | 5.588302    |
| 3127.978987 | 16.897942   | 13.248775   |
| 3132.267430 | 8.738987    | 6.861167    |
| 3436.931130 | 54.131177   | 46.633324   |
| 3530.470930 | 45.272727   | 40.063360   |

Zero-Point Energy : 0.235654 a.u.  
===== 6.412475 eV  
(imaginary frequencies were excluded from the summation)



TS2

Geometry CYCLE 24  
 =====

Energy gradients wrt nuclear displacements  
 =====

| Atom  | Cartesian (a.u./angstrom) |           |           |
|-------|---------------------------|-----------|-----------|
|       | X                         | Y         | Z         |
| 1 O   | -0.000091                 | 0.000191  | 0.000077  |
| 2 O   | 0.000183                  | -0.000246 | -0.000238 |
| 3 C   | 0.000190                  | -0.000155 | -0.000207 |
| 4 C   | -0.000349                 | 0.000500  | 0.000233  |
| 5 H   | 0.000010                  | -0.000013 | 0.000012  |
| 6 Ru  | -0.000005                 | -0.000597 | 0.000690  |
| 7 C   | 0.000009                  | -0.000022 | -0.000052 |
| 8 H   | 0.000069                  | -0.000008 | 0.000066  |
| 9 N   | 0.000065                  | 0.000206  | -0.000019 |
| 10 H  | 0.000307                  | -0.000017 | 0.000021  |
| 11 C  | 0.000017                  | -0.000062 | 0.000107  |
| 12 C  | -0.000347                 | -0.000071 | -0.000264 |
| 13 C  | 0.000045                  | 0.000062  | 0.000151  |
| 14 C  | -0.000003                 | 0.000019  | 0.000008  |
| 15 C  | -0.000057                 | 0.000041  | 0.000073  |
| 16 C  | -0.000046                 | 0.000170  | 0.000033  |
| 17 C  | 0.000058                  | -0.000095 | -0.000340 |
| 18 C  | 0.000170                  | 0.000024  | -0.000118 |
| 19 H  | 0.000104                  | -0.000056 | 0.000041  |
| 20 H  | 0.000128                  | 0.000030  | 0.000020  |
| 21 C  | -0.000027                 | -0.000274 | -0.000322 |
| 22 H  | 0.000053                  | 0.000277  | -0.000072 |
| 23 C  | -0.000272                 | 0.000220  | 0.000146  |
| 24 H  | -0.000151                 | -0.000183 | 0.000346  |
| 25 H  | -0.000133                 | -0.000077 | 0.000003  |
| 26 Cl | -0.000222                 | 0.000002  | -0.000077 |
| 27 H  | 0.000289                  | 0.000023  | -0.000229 |
| 28 H  | 0.000007                  | 0.000111  | -0.000089 |

-----  
 Geometry Convergence after Step 24  
 -----

|                          |            |                     |   |
|--------------------------|------------|---------------------|---|
| current energy           |            | -6.77828716 Hartree |   |
| abs of energy change     | 0.00000458 | 0.00100000          | T |
| constrained gradient max | 0.00069036 | 0.00100000          | T |
| constrained gradient rms | 0.00018980 | 0.00066667          | T |
| gradient max             | 0.00069036 |                     |   |
| gradient rms             | 0.00018980 |                     |   |
| cart. step max           | 0.00917931 | 0.01000000          | T |
| cart. step rms           | 0.00299673 | 0.00666667          | T |

|                                                                            | hartree             | eV         | kcal/mol  | kJ/mol     |
|----------------------------------------------------------------------------|---------------------|------------|-----------|------------|
|                                                                            | -----               | -----      | -----     | -----      |
| Pauli Repulsion                                                            |                     |            |           |            |
| Kinetic ( $\Delta T^0$ ):                                                  | 77.212190855203346  | 2101.0506  | 48451.39  | 202720.58  |
| Delta V <sup>Pauli</sup> Coulomb:                                          | -39.937339396385063 | -1086.7503 | -25061.06 | -104855.47 |
| Delta V <sup>Pauli</sup> LDA-XC:                                           | -9.565594854856148  | -260.2931  | -6002.50  | -25114.47  |
| Delta V <sup>Pauli</sup> GGA-Exchange:                                     | 0.545109085912838   | 14.8332    | 342.06    | 1431.18    |
| Delta V <sup>Pauli</sup> GGA-Correlation:                                  | -0.151746367884987  | -4.1292    | -95.22    | -398.41    |
| Total Pauli Repulsion:                                                     | 28.102619321989987  | 764.7112   | 17634.66  | 73783.42   |
| (Total Pauli Repulsion =<br>Delta E <sup>Pauli</sup> in BB paper)          |                     |            |           |            |
| Steric Interaction                                                         |                     |            |           |            |
| Pauli Repulsion (Delta E <sup>Pauli</sup> ):                               | 28.102619321989987  | 764.7112   | 17634.66  | 73783.42   |
| Electrostatic Interaction:                                                 | -5.992886968661976  | -163.0748  | -3760.59  | -15734.32  |
| (Electrostatic Interaction =<br>Delta V <sub>elstat</sub> in the BB paper) |                     |            |           |            |
| Total Steric Interaction:                                                  | 22.109732353328013  | 601.6364   | 13874.07  | 58049.09   |
| (Total Steric Interaction =<br>Delta E <sup>0</sup> in the BB paper)       |                     |            |           |            |
| Orbital Interactions                                                       |                     |            |           |            |
| A:                                                                         | -28.817292628419015 | -784.1584  | -18083.13 | -75659.79  |
| Total Orbital Interactions:                                                | -28.821422463954608 | -784.2708  | -18085.72 | -75670.63  |

Electronic Supplementary Information for Dalton Transactions  
This journal is © The Royal Society of Chemistry 2010

|                                    |                     |            |           |            |
|------------------------------------|---------------------|------------|-----------|------------|
| Alternative Decomposition Orb.Int. |                     |            |           |            |
| Kinetic:                           | -70.882077706959080 | -1928.7995 | -44479.18 | -186100.87 |
| Coulomb:                           | 38.751584728065112  | 1054.4843  | 24316.99  | 101742.27  |
| XC:                                | 3.309070514939364   | 90.0444    | 2076.47   | 8687.96    |
|                                    | -----               | -----      | -----     | -----      |
| Total Orbital Interactions:        | -28.821422463954605 | -784.2708  | -18085.72 | -75670.63  |
| Residu (E=Steric+OrbInt+Res):      | 0.000000988092721   | 0.0000     | 0.00      | 0.00       |
| Solvation Energy (el):             | -0.024750264005796  | -0.6735    | -15.53    | -64.98     |
| Dispersion Energy:                 | -0.046302903682096  | -1.2600    | -29.06    | -121.57    |
| Post-SCF Solvation Energies        |                     |            |           |            |
| Solvation Energy (cd):             | 0.004441476382430   | 0.1209     | 2.79      | 11.66      |
| Total Bonding Energy:              | -6.778300813839335  | -184.4469  | -4253.45  | -17796.43  |

Summary of Bonding Energy (energy terms are taken from the energy decomposition above)

|                                 |                    |           |          |           |
|---------------------------------|--------------------|-----------|----------|-----------|
| =====                           |                    |           |          |           |
| Electrostatic Energy:           | -5.992886968661976 | -163.0748 | -3760.59 | -15734.32 |
| Kinetic Energy:                 | 6.330113148244266  | 172.2511  | 3972.21  | 16619.71  |
| Coulomb (Steric+OrbInt) Energy: | -1.185753680227229 | -32.2660  | -744.07  | -3113.20  |
| XC Energy:                      | -5.863161621888932 | -159.5447 | -3679.19 | -15393.73 |
| Solvation:                      | -0.020308787623366 | -0.5526   | -12.74   | -53.32    |
| Dispersion Energy:              | -0.046302903682096 | -1.2600   | -29.06   | -121.57   |
|                                 | -----              | -----     | -----    | -----     |
| Total Bonding Energy:           | -6.778300813839333 | -184.4469 | -4253.45 | -17796.43 |

F R A G M E N T E N E R G Y T E R M S \*\*\* (summed over all fragments) \*\*\*

The energy terms below are (parts of) the Total Energy of the fragments from which the molecule is built.

|                          |                      |            |            |            |
|--------------------------|----------------------|------------|------------|------------|
| Exchange and Correlation |                      |            |            |            |
| Exchange LDA:            | -230.014145824632408 | -6259.0034 | -144336.07 | -603902.05 |
| Exchange GGA:            | -19.441423905678629  | -529.0281  | -12199.68  | -51043.45  |
| Correlation LDA:         | -12.269003163208856  | -333.8566  | -7698.92   | -32212.26  |
| Correlation GGA:         | 5.709982362420276    | 155.3765   | 3583.07    | 14991.56   |
|                          | -----                | -----      | -----      | -----      |
| Total XC:                | -256.014590531099657 | -6966.5115 | -160651.60 | -672166.21 |

Intensities  
=====

| Frequency<br>cm-1 | Dipole Strength<br>1e-40 esu2 cm2 | Absorption Intensity (degeneracy not counted)<br>km/mole |
|-------------------|-----------------------------------|----------------------------------------------------------|
| -----             | -----                             | -----                                                    |
| -988.565462       | 3165.830906                       | -784.460749                                              |
| 36.906686         | 213.812953                        | 1.977958                                                 |
| 50.168984         | 8.827832                          | 0.111011                                                 |
| 63.576502         | 145.624088                        | 2.320641                                                 |
| 74.136415         | 56.990516                         | 1.059040                                                 |
| 78.059090         | 17.122828                         | 0.335025                                                 |
| 89.568646         | 40.931093                         | 0.918941                                                 |
| 102.915148        | 19.374386                         | 0.499787                                                 |
| 130.363448        | 298.542687                        | 9.755294                                                 |
| 169.398689        | 2.372218                          | 0.100726                                                 |
| 192.230833        | 9.764382                          | 0.470485                                                 |
| 220.229132        | 244.693213                        | 13.507493                                                |
| 244.320387        | 137.651631                        | 8.429836                                                 |
| 275.534451        | 101.711669                        | 7.024651                                                 |
| 300.654569        | 625.767689                        | 47.158395                                                |
| 360.888724        | 23.064009                         | 2.086345                                                 |
| 382.642289        | 66.385332                         | 6.367122                                                 |
| 392.740030        | 598.179976                        | 58.886414                                                |
| 408.938090        | 81.669982                         | 8.371400                                                 |
| 440.674719        | 22.148906                         | 2.446518                                                 |
| 453.550939        | 5.725798                          | 0.650939                                                 |
| 466.374812        | 14.083153                         | 1.646315                                                 |
| 488.415816        | 32.204849                         | 3.942658                                                 |
| 510.529058        | 124.822741                        | 15.973212                                                |
| 548.326155        | 3.289494                          | 0.452112                                                 |
| 569.410215        | 77.131546                         | 11.008683                                                |
| 589.581376        | 319.927823                        | 47.279605                                                |
| 618.514081        | 41.588915                         | 6.447706                                                 |
| 637.220416        | 101.264024                        | 16.174205                                                |
| 649.510046        | 64.162184                         | 10.445833                                                |
| 707.152385        | 129.885975                        | 23.022546                                                |

Electronic Supplementary Information for Dalton Transactions  
This journal is © The Royal Society of Chemistry 2010

|             |             |             |
|-------------|-------------|-------------|
| 719.980913  | 634.829574  | 114.566120  |
| 733.169692  | 702.598759  | 129.118940  |
| 738.684083  | 762.582485  | 141.196404  |
| 749.950790  | 222.591129  | 41.842603   |
| 765.704974  | 984.857660  | 189.022283  |
| 781.141225  | 35.482116   | 6.947317    |
| 850.997417  | 16.613623   | 3.543812    |
| 868.400429  | 2.098432    | 0.456765    |
| 931.869895  | 12.840021   | 2.999156    |
| 940.998382  | 110.058968  | 25.959264   |
| 962.690294  | 3.254818    | 0.785401    |
| 966.428882  | 2.463344    | 0.596723    |
| 978.610099  | 0.034419    | 0.008443    |
| 990.476384  | 13.899338   | 3.450772    |
| 995.418147  | 6.513251    | 1.625105    |
| 1009.950117 | 16.308696   | 4.128547    |
| 1035.618363 | 6.623749    | 1.719419    |
| 1043.311707 | 83.061117   | 21.721505   |
| 1085.078288 | 29.813007   | 8.108582    |
| 1098.449788 | 20.444460   | 5.629035    |
| 1119.518872 | 17.865191   | 5.013224    |
| 1134.582361 | 27.464181   | 7.810535    |
| 1230.896167 | 13.039678   | 4.023151    |
| 1264.480168 | 45.139435   | 14.306922   |
| 1277.815781 | 58.823597   | 18.840737   |
| 1302.379540 | 43.130419   | 14.079892   |
| 1315.154330 | 44.610053   | 14.705762   |
| 1397.976483 | 82.796143   | 29.012693   |
| 1419.407817 | 114.128466  | 40.604974   |
| 1438.190452 | 68.135318   | 24.562171   |
| 1462.998128 | 253.806814  | 93.073301   |
| 1535.296354 | 31.176422   | 11.997660   |
| 1546.726934 | 39.190402   | 15.193976   |
| 1563.912477 | 34.772534   | 13.630973   |
| 1587.738463 | 135.221927  | 53.815101   |
| 1794.403983 | 269.420682  | 121.179520  |
| 1921.200928 | 1730.394758 | 833.289767  |
| 1945.297447 | 2494.298364 | 1216.220975 |
| 2014.706546 | 1921.722211 | 970.466341  |
| 3096.169209 | 0.544253    | 0.422380    |
| 3102.623914 | 38.294278   | 29.781124   |
| 3103.248742 | 22.787758   | 17.725408   |
| 3105.062332 | 10.982497   | 8.547705    |
| 3110.246102 | 5.185562    | 4.042674    |
| 3118.569444 | 18.624187   | 14.558305   |
| 3126.279297 | 5.224580    | 4.094088    |
| 3135.498016 | 0.785257    | 0.617158    |

Zero-Point Energy : 0.186058 a.u.  
===== 5.062885 eV  
(imaginary frequencies were excluded from the summation)

2-phenylpyridine

Geometry CYCLE 6  
 =====

Energy gradients wrt nuclear displacements  
 =====

| Atom | Cartesian (a.u./angstrom) |           |           |
|------|---------------------------|-----------|-----------|
|      | X                         | Y         | Z         |
| 1 H  | -0.000081                 | -0.000013 | 0.000013  |
| 2 C  | -0.000137                 | -0.000142 | 0.000000  |
| 3 H  | 0.000070                  | 0.000087  | -0.000009 |
| 4 N  | 0.000398                  | -0.000020 | 0.000115  |
| 5 H  | 0.000051                  | -0.000060 | -0.000015 |
| 6 C  | 0.000080                  | 0.000022  | -0.000052 |
| 7 C  | 0.000237                  | -0.000033 | 0.000122  |
| 8 C  | -0.000037                 | 0.000042  | 0.000038  |
| 9 C  | 0.000189                  | -0.000094 | -0.000243 |
| 10 C | 0.000086                  | -0.000156 | 0.000083  |
| 11 C | -0.000118                 | 0.000014  | 0.000025  |
| 12 C | -0.000551                 | 0.000463  | 0.000204  |
| 13 C | -0.000045                 | 0.000051  | -0.000029 |
| 14 H | -0.000017                 | -0.000054 | 0.000013  |
| 15 H | -0.000107                 | 0.000002  | -0.000023 |
| 16 C | -0.000077                 | -0.000148 | 0.000056  |
| 17 H | 0.000215                  | -0.000244 | -0.000046 |
| 18 C | -0.000003                 | 0.000000  | -0.000052 |
| 19 H | -0.000129                 | 0.000140  | -0.000058 |
| 20 H | 0.000085                  | 0.000013  | 0.000025  |
| 21 H | -0.000110                 | 0.000129  | -0.000168 |

-----  
 Geometry Convergence after Step 6  
 -----

|                          |                     |            |   |
|--------------------------|---------------------|------------|---|
| current energy           | -5.08466851 Hartree |            |   |
| abs of energy change     | 0.00002407          | 0.00100000 | T |
| constrained gradient max | 0.00055069          | 0.01000000 | T |
| constrained gradient rms | 0.00014401          | 0.00666667 | T |
| gradient max             | 0.00055069          |            |   |
| gradient rms             | 0.00014401          |            |   |
| cart. step max           | 0.00570863          | 0.01000000 | T |
| cart. step rms           | 0.00253871          | 0.00666667 | T |

|                                                                 | hartree                    | eV               | kcal/mol         | kJ/mol           |
|-----------------------------------------------------------------|----------------------------|------------------|------------------|------------------|
|                                                                 | -----                      | -----            | -----            | -----            |
| <b>Pauli Repulsion</b>                                          |                            |                  |                  |                  |
| Kinetic (Delta T^0):                                            | 53.622855224889022         | 1459.1521        | 33648.85         | 140786.79        |
| Delta V^Pauli Coulomb:                                          | -25.292902378933206        | -688.2549        | -66406.51        | -27806.51        |
| Delta V^Pauli LDA-XC:                                           | -6.878122208264295         | -187.1632        | -4316.09         | -18058.51        |
| Delta V^Pauli GGA-Exchange:                                     | 0.341534241218545          | 9.2936           | 214.32           | 896.70           |
| Delta V^Pauli GGA-Correlation:                                  | -0.076374462258057         | -2.0783          | -47.93           | -200.52          |
| <b>Total Pauli Repulsion:</b>                                   | <b>21.716990416652010</b>  | <b>590.9494</b>  | <b>13627.62</b>  | <b>57017.95</b>  |
| (Total Pauli Repulsion =<br>Delta E^Pauli in BB paper)          |                            |                  |                  |                  |
| <b>Steric Interaction</b>                                       |                            |                  |                  |                  |
| Pauli Repulsion (Delta E^Pauli):                                | 21.716990416652010         | 590.9494         | 13627.62         | 57017.95         |
| Electrostatic Interaction:                                      | -4.235485733630800         | -115.2534        | -2657.81         | -11120.27        |
| (Electrostatic Interaction =<br>Delta V_elstat in the BB paper) |                            |                  |                  |                  |
| <b>Total Steric Interaction:</b>                                | <b>17.481504683021210</b>  | <b>475.6959</b>  | <b>10969.81</b>  | <b>45897.68</b>  |
| (Total Steric Interaction =<br>Delta E^0 in the BB paper)       |                            |                  |                  |                  |
| <b>Orbital Interactions</b>                                     |                            |                  |                  |                  |
| A:                                                              | -22.530207530232509        | -613.0781        | -14137.92        | -59153.05        |
| <b>Total Orbital Interactions:</b>                              | <b>-22.533772049695010</b> | <b>-613.1751</b> | <b>-14140.16</b> | <b>-59162.41</b> |
| <b>Alternative Decomposition Orb.Int.</b>                       |                            |                  |                  |                  |
| Kinetic:                                                        | -48.884484015271077        | -1330.2145       | -30675.48        | -128346.19       |
| Coulomb:                                                        | 24.329574746654654         | 662.0414         | 15267.04         | 63877.29         |
| XC:                                                             | 2.021137218921422          | 54.9979          | 1268.28          | 5306.50          |

Electronic Supplementary Information for Dalton Transactions  
 This journal is © The Royal Society of Chemistry 2010

|                               |                     |           |           |           |
|-------------------------------|---------------------|-----------|-----------|-----------|
| Total Orbital Interactions:   | -22.533772049695003 | -613.1751 | -14140.16 | -59162.41 |
| Residu (E=Steric+OrbInt+Res): | -0.000002168630106  | -0.0001   | 0.00      | -0.01     |
| Solvation Energy (el):        | -0.016138669419793  | -0.4392   | -10.13    | -42.37    |
| Dispersion Energy:            | -0.019933119969537  | -0.5424   | -12.51    | -52.33    |
| Post-SCF Solvation Energies   |                     |           |           |           |
| Solvation Energy (cd):        | 0.003672815778144   | 0.0999    | 2.30      | 9.64      |
| Total Bonding Energy:         | -5.084668508915091  | -138.3609 | -3190.68  | -13349.80 |

Summary of Bonding Energy (energy terms are taken from the energy decomposition above)

```
=====
```

|                                 |                    |           |          |           |
|---------------------------------|--------------------|-----------|----------|-----------|
| Electrostatic Energy:           | -4.235485733630800 | -115.2534 | -2657.81 | -11120.27 |
| Kinetic Energy:                 | 4.738371209617945  | 128.9376  | 2973.37  | 12440.59  |
| Coulomb (Steric+OrbInt) Energy: | -0.963329800908660 | -26.2135  | -604.50  | -2529.22  |
| XC Energy:                      | -4.591825210382385 | -124.9499 | -2881.41 | -12055.84 |
| Solvation:                      | -0.012465853641649 | -0.3392   | -7.82    | -32.73    |
| Dispersion Energy:              | -0.019933119969537 | -0.5424   | -12.51   | -52.33    |
| Total Bonding Energy:           | -5.084668508915087 | -138.3609 | -3190.68 | -13349.80 |

F R A G M E N T E N E R G Y T E R M S \*\*\* (summed over all fragments) \*\*\*

The energy terms below are (parts of) the Total Energy of the fragments from which the molecule is built.

|                          |                     |            |           |            |
|--------------------------|---------------------|------------|-----------|------------|
| Exchange and Correlation |                     |            |           |            |
| Exchange LDA:            | -55.694388511439058 | -1515.5214 | -34948.76 | -146225.60 |
| Exchange GGA:            | -7.415017657590511  | -201.7729  | -4652.99  | -19468.13  |
| Correlation LDA:         | -4.924029221850020  | -133.9897  | -3089.88  | -12928.04  |
| Correlation GGA:         | 2.624287728715931   | 71.4105    | 1646.77   | 6890.07    |
| Total XC:                | -65.409147662163662 | -1779.8735 | -41044.86 | -171731.69 |

Intensities  
 =====

| Frequency<br>cm-1 | Dipole Strength<br>1e-40 esu2 cm2 | Absorption Intensity (degeneracy not counted)<br>km/mole |
|-------------------|-----------------------------------|----------------------------------------------------------|
| 49.291993         | 187.487859                        | 2.316475                                                 |
| 80.905736         | 208.480420                        | 4.227880                                                 |
| 152.876386        | 81.102795                         | 3.107809                                                 |
| 240.394000        | 9.947706                          | 0.599411                                                 |
| 325.129028        | 0.916309                          | 0.074675                                                 |
| 382.318785        | 85.740753                         | 8.216578                                                 |
| 397.044648        | 27.569324                         | 2.743744                                                 |
| 400.212890        | 8.955206                          | 0.898348                                                 |
| 458.181851        | 84.171297                         | 9.666739                                                 |
| 541.722318        | 13.321642                         | 1.808892                                                 |
| 603.522689        | 46.993212                         | 7.108972                                                 |
| 614.574736        | 59.862735                         | 9.221665                                                 |
| 628.370738        | 32.911806                         | 5.183770                                                 |
| 682.562743        | 414.323555                        | 70.885968                                                |
| 727.069974        | 738.761669                        | 134.635204                                               |
| 730.216079        | 163.555540                        | 29.936066                                                |
| 742.999709        | 2.613643                          | 0.486758                                                 |
| 788.834805        | 37.023287                         | 7.320472                                                 |
| 823.709278        | 3.037343                          | 0.627113                                                 |
| 870.598462        | 3.062693                          | 0.668343                                                 |
| 906.017313        | 10.881862                         | 2.471256                                                 |
| 944.723511        | 1.844715                          | 0.436830                                                 |
| 954.225643        | 2.863942                          | 0.685004                                                 |
| 968.404461        | 22.756636                         | 5.523863                                                 |
| 970.765968        | 11.869278                         | 2.888131                                                 |
| 974.695989        | 1.459165                          | 0.356493                                                 |
| 981.328197        | 1.237954                          | 0.304507                                                 |
| 1001.570253       | 73.781881                         | 18.522910                                                |
| 1022.911928       | 5.237718                          | 1.342946                                                 |
| 1041.212221       | 7.303234                          | 1.906042                                                 |
| 1063.270305       | 64.987668                         | 17.320192                                                |
| 1071.755164       | 36.473276                         | 9.798248                                                 |
| 1115.401273       | 8.009852                          | 2.239410                                                 |
| 1122.973845       | 20.663268                         | 5.816299                                                 |
| 1156.742293       | 18.005684                         | 5.220647                                                 |
| 1254.440148       | 7.263050                          | 2.283742                                                 |

Electronic Supplementary Information for Dalton Transactions  
This journal is © The Royal Society of Chemistry 2010

|             |            |           |
|-------------|------------|-----------|
| 1265.808485 | 49.005020  | 15.548434 |
| 1277.658263 | 42.744552  | 13.689057 |
| 1300.638972 | 3.545911   | 1.156013  |
| 1326.329281 | 7.031351   | 2.337589  |
| 1397.471100 | 98.929203  | 34.653365 |
| 1425.563340 | 142.242788 | 50.827043 |
| 1445.965391 | 180.902789 | 65.566384 |
| 1477.480582 | 6.581207   | 2.437280  |
| 1542.911506 | 94.821382  | 36.671221 |
| 1561.438318 | 61.313132  | 23.996970 |
| 1568.301315 | 235.191679 | 92.454814 |
| 1582.549497 | 6.798561   | 2.696822  |
| 3072.470199 | 27.768792  | 21.385664 |
| 3086.254535 | 1.627876   | 1.259306  |
| 3092.594407 | 2.979522   | 2.309658  |
| 3094.678134 | 12.261740  | 9.511427  |
| 3099.818451 | 14.616838  | 11.357108 |
| 3108.295266 | 6.541251   | 5.096373  |
| 3110.436085 | 10.194449  | 7.948096  |
| 3113.820566 | 13.102252  | 10.226278 |
| 3121.428321 | 2.034053   | 1.591453  |

Zero-Point Energy : 0.163716 a.u.  
===== 4.454931 eV

*Isotopic effects*

P3-{D,H}

Coordinates in Frequency Displacement 0

| Atom   | X         | Y         | Z (Angstrom) |
|--------|-----------|-----------|--------------|
| 1.O    | -2.592196 | -0.204867 | 4.871256     |
| 2.O    | 0.163139  | -3.823322 | 4.542926     |
| 3.C    | -1.448302 | -0.423383 | 4.827113     |
| 4.C    | 0.282948  | -2.675597 | 4.604106     |
| 5.H    | 3.032232  | -0.238810 | 6.365638     |
| 6.Ru   | 0.399978  | -0.689996 | 4.713009     |
| 7.C    | 3.452464  | -0.391199 | 5.372722     |
| 8.H    | 5.505344  | -0.140215 | 5.958227     |
| 9.N    | 2.553609  | -0.637043 | 4.395025     |
| 10.H   | -1.423026 | -0.671414 | 1.737946     |
| 11.C   | 4.823493  | -0.344157 | 5.133833     |
| 12.C   | 0.629374  | -0.731833 | 2.410130     |
| 13.C   | -0.405687 | -0.976214 | 1.495649     |
| 14.C   | 2.999805  | -0.839638 | 3.117498     |
| 15.C   | 5.290962  | -0.555483 | 3.832060     |
| 16.C   | 1.967862  | -1.082224 | 2.104676     |
| 17.C   | 4.369171  | -0.803104 | 2.818588     |
| 18.C   | -0.117039 | -1.591557 | 0.275121     |
| 19.H   | -0.917520 | -1.787149 | -0.438495    |
| 20.H   | 6.357249  | -0.519048 | 3.608615     |
| 21.C   | 2.239696  | -1.697060 | 0.872468     |
| 22.H   | 4.697387  | -0.955737 | 1.792705     |
| 23.C   | 1.204895  | -1.948563 | -0.032904    |
| 24.H   | 3.256528  | -2.001179 | 0.627332     |
| 25.H   | 1.429651  | -2.431677 | -0.983731    |
| 26.Cl  | 0.630789  | -0.779423 | 7.127182     |
| 27.H.D | 0.456440  | 0.179489  | 3.123062     |
| 28.H   | 0.531776  | 0.937598  | 4.904968     |

Intensities  
=====

| Frequency<br>cm-1 | Dipole Strength<br>1e-40 esu2 cm2 | Absorption Intensity (degeneracy not counted)<br>km/mole |
|-------------------|-----------------------------------|----------------------------------------------------------|
| -----             | -----                             | -----                                                    |
| 39.489603         | 112.135513                        | 1.109952                                                 |
| 49.992943         | 16.667744                         | 0.208864                                                 |
| 65.403319         | 149.227885                        | 2.446402                                                 |
| 71.775614         | 56.773979                         | 1.021420                                                 |
| 73.848101         | 8.770058                          | 0.162338                                                 |
| 90.300632         | 40.135441                         | 0.908441                                                 |
| 100.202993        | 76.325916                         | 1.917038                                                 |
| 130.643505        | 119.749571                        | 3.921388                                                 |

|             |             |             |
|-------------|-------------|-------------|
| 155.549490  | 11.220143   | 0.437467    |
| 170.566539  | 148.103842  | 6.331961    |
| 205.670048  | 65.258428   | 3.364230    |
| 229.564380  | 45.733410   | 2.631577    |
| 267.952007  | 3.903584    | 0.262179    |
| 302.279997  | 647.317197  | 49.046116   |
| 346.940520  | 25.819105   | 2.245299    |
| 367.230902  | 84.703726   | 7.796861    |
| 383.839241  | 193.739493  | 18.639987   |
| 396.029815  | 35.578731   | 3.531802    |
| 408.390388  | 152.947969  | 15.656594   |
| 439.031968  | 49.893024   | 5.490527    |
| 450.381749  | 8.927013    | 1.007778    |
| 475.308071  | 19.921847   | 2.373465    |
| 510.758354  | 181.568325  | 23.245219   |
| 542.561940  | 37.162036   | 5.053903    |
| 564.105080  | 219.880638  | 31.090311   |
| 571.697843  | 226.853319  | 32.507963   |
| 607.898230  | 83.915732   | 12.786519   |
| 614.874446  | 14.733687   | 2.270785    |
| 644.727336  | 2.501299    | 0.404222    |
| 695.939570  | 228.829594  | 39.917358   |
| 721.777600  | 314.603129  | 56.917329   |
| 726.373576  | 281.688703  | 51.287029   |
| 738.199520  | 708.248732  | 131.050184  |
| 743.788802  | 10.883743   | 2.029112    |
| 780.917018  | 14.320854   | 2.803186    |
| 799.336531  | 358.355488  | 71.799561   |
| 813.794396  | 653.654881  | 133.334112  |
| 849.664414  | 26.105203   | 5.559716    |
| 872.701766  | 8.587030    | 1.878395    |
| 923.723418  | 176.264479  | 40.811713   |
| 938.183989  | 2.923785    | 0.687561    |
| 959.463022  | 9.193949    | 2.211100    |
| 969.579820  | 20.450706   | 4.970155    |
| 979.928175  | 3.058406    | 0.751221    |
| 987.448346  | 202.507411  | 50.122576   |
| 1002.064475 | 137.577010  | 34.555693   |
| 1009.883762 | 25.044818   | 6.339680    |
| 1034.052900 | 12.917827   | 3.348192    |
| 1043.145356 | 51.089082   | 13.358294   |
| 1083.817178 | 25.560208   | 6.943820    |
| 1095.626718 | 17.855185   | 4.903487    |
| 1119.548369 | 11.622166   | 3.261430    |
| 1133.119272 | 20.586563   | 5.847060    |
| 1229.646875 | 10.829430   | 3.337829    |
| 1264.964738 | 5.318642    | 1.686387    |
| 1278.871202 | 57.557628   | 18.450484   |
| 1299.920248 | 16.360965   | 5.330939    |
| 1324.904469 | 47.378710   | 15.734244   |
| 1395.319161 | 126.237707  | 44.151018   |
| 1420.247916 | 82.918744   | 29.518545   |
| 1438.551440 | 194.039397  | 69.967021   |
| 1465.792799 | 114.400411  | 42.031824   |
| 1537.299821 | 33.068751   | 12.742494   |
| 1548.678572 | 24.096329   | 9.353846    |
| 1566.184995 | 8.030934    | 3.152733    |
| 1587.310322 | 81.381843   | 32.379298   |
| 1677.318968 | 143.443902  | 60.308124   |
| 1885.126685 | 512.050302  | 241.953126  |
| 1937.217878 | 3133.374807 | 1521.489241 |
| 2007.688730 | 2364.632073 | 1189.975520 |
| 3101.039430 | 0.265175    | 0.206119    |
| 3109.258626 | 1.968340    | 1.534034    |
| 3110.647393 | 10.785504   | 8.409483    |
| 3116.092122 | 33.838961   | 26.430500   |
| 3117.371150 | 7.916890    | 6.186161    |
| 3122.350311 | 12.173177   | 9.527164    |
| 3129.654815 | 6.426782    | 5.041597    |
| 3136.886635 | 0.118126    | 0.092880    |

Zero-Point Energy : 0.187055 a.u.

=====

5.090012 eV

TS2-{D,H}

Coordinates in Frequency Displacement 0

| Atom   | X         | Y         | Z (Angstrom) |
|--------|-----------|-----------|--------------|
| 1.O    | 1.735844  | -3.418345 | -1.135031    |
| 2.O    | -2.391373 | -1.744990 | -1.379085    |
| 3.C    | 1.187183  | -2.468216 | -0.747788    |
| 4.C    | -1.378689 | -1.412143 | -0.933413    |
| 5.H    | -0.132287 | 2.135186  | -0.559323    |
| 6.Ru   | 0.324606  | -0.943757 | -0.071908    |
| 7.C    | -0.597827 | 2.019065  | 0.418898     |
| 8.H    | -1.185182 | 4.075144  | 0.641888     |
| 9.N    | -0.566120 | 0.769392  | 0.928882     |
| 10.H   | 0.441855  | -3.799315 | 1.662843     |
| 11.C   | -1.182509 | 3.085408  | 1.096550     |
| 12.C   | -0.286138 | -1.768571 | 1.834659     |
| 13.C   | -0.167808 | -3.107096 | 2.243703     |
| 14.C   | -1.125327 | 0.525480  | 2.154559     |
| 15.C   | -1.750050 | 2.853562  | 2.354567     |
| 16.C   | -1.046676 | -0.861387 | 2.619401     |
| 17.C   | -1.717867 | 1.566711  | 2.884655     |
| 18.C   | -0.829326 | -3.554920 | 3.392299     |
| 19.H   | -0.742230 | -4.599004 | 3.694852     |
| 20.H   | -2.210003 | 3.666518  | 2.916920     |
| 21.C   | -1.705023 | -1.323728 | 3.772868     |
| 22.H   | -2.145995 | 1.363407  | 3.863642     |
| 23.C   | -1.599544 | -2.662806 | 4.153841     |
| 24.H   | -2.310413 | -0.643435 | 4.370372     |
| 25.H   | -2.116396 | -3.012164 | 5.047624     |
| 26.Cl  | 1.063422  | 0.434494  | -1.995219    |
| 27.H.D | 0.982596  | -1.207588 | 1.452714     |
| 28.H   | 1.742113  | -0.531030 | 0.743129     |

Intensities

=====

| Frequency<br>cm-1 | Dipole Strength<br>1e-40 esu2 cm2 | Absorption Intensity (degeneracy not counted)<br>km/mole |
|-------------------|-----------------------------------|----------------------------------------------------------|
| -748.181445       | 2068.906241                       | -387.994718                                              |
| 38.618092         | 216.290438                        | 2.093660                                                 |
| 50.775303         | 11.371180                         | 0.144723                                                 |
| 63.341824         | 142.891976                        | 2.268697                                                 |
| 74.648677         | 58.273326                         | 1.090360                                                 |
| 79.028764         | 28.170644                         | 0.558033                                                 |
| 89.394135         | 38.006964                         | 0.851629                                                 |
| 103.140454        | 19.098729                         | 0.493755                                                 |
| 129.960951        | 290.082429                        | 9.449577                                                 |
| 169.512401        | 1.281895                          | 0.054467                                                 |
| 191.592110        | 12.964506                         | 0.622604                                                 |
| 220.021662        | 246.862651                        | 13.614412                                                |
| 242.877408        | 134.072563                        | 8.162160                                                 |
| 274.996543        | 98.327901                         | 6.777696                                                 |
| 300.281660        | 625.107864                        | 47.050240                                                |
| 360.194499        | 20.765392                         | 1.874801                                                 |
| 380.429044        | 95.487475                         | 9.105382                                                 |
| 389.221887        | 598.047118                        | 58.345951                                                |
| 407.208831        | 29.123767                         | 2.972643                                                 |
| 436.848242        | 15.835061                         | 1.733917                                                 |
| 451.239903        | 9.553873                          | 1.080600                                                 |
| 464.664247        | 19.526139                         | 2.274226                                                 |
| 487.515526        | 36.554624                         | 4.466927                                                 |
| 510.127523        | 109.738634                        | 14.031897                                                |
| 547.007168        | 24.712138                         | 3.388297                                                 |
| 564.004288        | 92.245881                         | 13.040897                                                |
| 587.819457        | 354.815360                        | 52.278659                                                |
| 617.444392        | 42.859062                         | 6.633131                                                 |
| 635.979602        | 180.547811                        | 28.781504                                                |
| 645.178760        | 97.019195                         | 15.689742                                                |
| 669.418151        | 303.425663                        | 50.912903                                                |
| 708.287432        | 56.843453                         | 10.091787                                                |
| 712.995652        | 1158.390329                       | 207.023609                                               |



|             |             |             |
|-------------|-------------|-------------|
| 723.636118  | 341.289936  | 61.904438   |
| 737.457901  | 766.539587  | 141.693488  |
| 750.230344  | 54.589503   | 10.265541   |
| 781.167790  | 63.421504   | 12.418208   |
| 790.224601  | 280.692306  | 55.597994   |
| 849.773601  | 3.320536    | 0.707277    |
| 868.463821  | 2.463467    | 0.536261    |
| 931.461767  | 6.734919    | 1.572445    |
| 963.278043  | 2.362285    | 0.570377    |
| 966.260444  | 2.061760    | 0.499356    |
| 979.512588  | 0.048587    | 0.011929    |
| 988.022973  | 10.253420   | 2.539299    |
| 994.816503  | 10.335510   | 2.577229    |
| 1009.858519 | 14.909181   | 3.773918    |
| 1034.837045 | 8.060596    | 2.090823    |
| 1042.881158 | 79.666508   | 20.825176   |
| 1084.691642 | 35.246381   | 9.582943    |
| 1096.516203 | 25.370457   | 6.973028    |
| 1117.801507 | 15.745802   | 4.411716    |
| 1134.405378 | 34.751853   | 9.881533    |
| 1229.378022 | 8.578682    | 2.643529    |
| 1263.975259 | 42.734595   | 13.539301   |
| 1277.397550 | 56.024225   | 17.938247   |
| 1302.332698 | 41.978498   | 13.703355   |
| 1314.035135 | 73.852229   | 24.324765   |
| 1326.191343 | 228.018754  | 75.797490   |
| 1401.941251 | 159.105301  | 55.910392   |
| 1419.032708 | 103.989739  | 36.988010   |
| 1441.289081 | 108.546906  | 39.214494   |
| 1463.867593 | 220.622788  | 80.952494   |
| 1535.384550 | 32.483573   | 12.501411   |
| 1547.848268 | 50.929418   | 19.759464   |
| 1566.284105 | 67.561648   | 26.524600   |
| 1587.776510 | 135.319860  | 53.855366   |
| 1865.100303 | 223.724346  | 104.590806  |
| 1938.517385 | 3158.157077 | 1534.551602 |
| 2008.800097 | 2399.478295 | 1208.179929 |
| 3096.291109 | 0.566271    | 0.439485    |
| 3102.879339 | 62.161144   | 48.346157   |
| 3103.355240 | 2.440967    | 1.898766    |
| 3105.473857 | 8.160704    | 6.352338    |
| 3110.989927 | 6.390519    | 4.983251    |
| 3118.913446 | 17.622593   | 13.776891   |
| 3126.240711 | 4.949767    | 3.878692    |
| 3135.613062 | 0.644103    | 0.506239    |

Zero-Point Energy : 0.184162 a.u.  
===== 5.011316 eV  
(imaginary frequencies were excluded from the summation)

P4-{D,H}

Coordinates in Frequency Displacement 0

| Atom | X         | Y         | Z (Angstrom) |
|------|-----------|-----------|--------------|
| 1.O  | 1.591669  | -3.518772 | -1.041079    |
| 2.O  | -2.317040 | -1.685991 | -1.437725    |
| 3.C  | 1.101070  | -2.523376 | -0.695949    |
| 4.C  | -1.319899 | -1.400556 | -0.921942    |
| 5.H  | -0.226437 | 2.124237  | -0.596302    |
| 6.Ru | 0.289950  | -0.945164 | -0.067445    |
| 7.C  | -0.676114 | 2.006236  | 0.389033     |
| 8.H  | -1.286615 | 4.055634  | 0.613868     |
| 9.N  | -0.618167 | 0.760769  | 0.908083     |
| 10.H | 0.195289  | -3.862028 | 1.462622     |
| 11.C | -1.262885 | 3.067703  | 1.071336     |
| 12.C | -0.405292 | -1.793534 | 1.712700     |
| 13.C | -0.282316 | -3.132493 | 2.117371     |
| 14.C | -1.152597 | 0.508085  | 2.143260     |
| 15.C | -1.810655 | 2.829145  | 2.337457     |
| 16.C | -1.038270 | -0.878312 | 2.595728     |
| 17.C | -1.753206 | 1.545648  | 2.873328     |

Electronic Supplementary Information for Dalton Transactions  
 This journal is © The Royal Society of Chemistry 2010

|        |           |           |           |
|--------|-----------|-----------|-----------|
| 18.C   | -0.765623 | -3.555813 | 3.363801  |
| 19.H   | -0.656133 | -4.600918 | 3.657707  |
| 20.H   | -2.279412 | 3.636311  | 2.900999  |
| 21.C   | -1.522569 | -1.310211 | 3.847128  |
| 22.H   | -2.173315 | 1.341311  | 3.855480  |
| 23.C   | -1.387474 | -2.644503 | 4.230612  |
| 24.H   | -2.004206 | -0.605135 | 4.524035  |
| 25.H   | -1.764013 | -2.973930 | 5.199044  |
| 26.Cl  | 1.173138  | 0.481606  | -1.948605 |
| 27.H.D | 1.666814  | -0.732607 | 1.166185  |
| 28.H   | 1.921719  | -0.276448 | 0.549566  |

Intensities  
 =====

| Frequency<br>cm-1 | Dipole Strength<br>1e-40 esu <sup>2</sup> cm <sup>2</sup> | Absorption Intensity (degeneracy not counted)<br>km/mole |
|-------------------|-----------------------------------------------------------|----------------------------------------------------------|
| 34.794241         | 261.002485                                                | 2.276303                                                 |
| 48.856277         | 25.074943                                                 | 0.307071                                                 |
| 66.072627         | 120.855296                                                | 2.001545                                                 |
| 77.543946         | 29.851701                                                 | 0.580223                                                 |
| 83.738148         | 13.041085                                                 | 0.273725                                                 |
| 92.762357         | 12.741719                                                 | 0.296263                                                 |
| 103.975191        | 3.577682                                                  | 0.093242                                                 |
| 124.998973        | 330.690469                                                | 10.361108                                                |
| 181.084062        | 103.792290                                                | 4.711112                                                 |
| 196.446926        | 16.033309                                                 | 0.789490                                                 |
| 219.672648        | 416.162825                                                | 22.914867                                                |
| 247.744850        | 85.216744                                                 | 5.291851                                                 |
| 270.478611        | 313.023263                                                | 21.222064                                                |
| 277.630751        | 22.377569                                                 | 1.557251                                                 |
| 292.810309        | 289.588461                                                | 21.254245                                                |
| 323.260126        | 524.462461                                                | 42.495664                                                |
| 359.429911        | 99.338580                                                 | 8.949736                                                 |
| 368.465700        | 68.008545                                                 | 6.281142                                                 |
| 412.043589        | 131.690011                                                | 13.601101                                                |
| 433.270717        | 30.810976                                                 | 3.346130                                                 |
| 460.902614        | 209.948870                                                | 24.254972                                                |
| 465.580568        | 4.869864                                                  | 0.568316                                                 |
| 476.011281        | 161.131077                                                | 19.225366                                                |
| 495.456384        | 17.412213                                                 | 2.162407                                                 |
| 525.526363        | 93.846265                                                 | 12.362024                                                |
| 549.275504        | 158.927910                                                | 21.881066                                                |
| 555.032556        | 304.122746                                                | 42.310234                                                |
| 589.540841        | 487.279037                                                | 72.006167                                                |
| 620.495495        | 71.086246                                                 | 11.056108                                                |
| 630.995182        | 301.329553                                                | 47.659100                                                |
| 638.734895        | 57.318300                                                 | 9.176816                                                 |
| 654.729292        | 3.651022                                                  | 0.599176                                                 |
| 709.555830        | 96.778600                                                 | 17.212501                                                |
| 720.382475        | 302.748761                                                | 54.666791                                                |
| 736.823341        | 761.723591                                                | 140.682103                                               |
| 745.280007        | 102.991284                                                | 19.239687                                                |
| 752.900546        | 86.266571                                                 | 16.280143                                                |
| 780.342133        | 13.566865                                                 | 2.653644                                                 |
| 843.316334        | 2.703384                                                  | 0.571448                                                 |
| 864.266898        | 3.178725                                                  | 0.688619                                                 |
| 922.997515        | 3.345818                                                  | 0.774071                                                 |
| 959.654293        | 1.330241                                                  | 0.319980                                                 |
| 961.914014        | 4.909139                                                  | 1.183640                                                 |
| 977.929243        | 0.127566                                                  | 0.031270                                                 |
| 993.215527        | 15.604690                                                 | 3.884872                                                 |
| 999.574711        | 165.359525                                                | 41.430726                                                |
| 1011.060088       | 5.448248                                                  | 1.380740                                                 |
| 1039.270951       | 1.899522                                                  | 0.494824                                                 |
| 1045.391257       | 113.129598                                                | 29.643753                                                |
| 1086.691859       | 8.474109                                                  | 2.308227                                                 |
| 1096.029376       | 26.128838                                                 | 7.178279                                                 |
| 1120.331928       | 24.032427                                                 | 6.748736                                                 |
| 1137.402069       | 34.050934                                                 | 9.707806                                                 |
| 1231.944310       | 56.192477                                                 | 17.351911                                                |
| 1260.882934       | 83.962965                                                 | 26.536314                                                |
| 1263.955842       | 108.516802                                                | 34.380086                                                |
| 1278.158931       | 37.580952                                                 | 12.040117                                                |

|             |             |             |
|-------------|-------------|-------------|
| 1299.298469 | 56.825255   | 18.506675   |
| 1309.529544 | 83.371216   | 27.365885   |
| 1400.395227 | 142.890975  | 50.157224   |
| 1415.711314 | 78.700752   | 27.927474   |
| 1435.816642 | 14.869002   | 5.351295    |
| 1461.400148 | 452.946171  | 165.918117  |
| 1532.821151 | 59.829134   | 22.986999   |
| 1545.290945 | 114.422831  | 44.320129   |
| 1563.027859 | 157.651895  | 61.765219   |
| 1587.074651 | 251.551902  | 100.069800  |
| 1937.372096 | 3089.225314 | 1500.170757 |
| 2010.305190 | 2271.626994 | 1144.661524 |
| 3014.351551 | 49.805963   | 37.631654   |
| 3083.540325 | 3.176766    | 2.455347    |
| 3097.773261 | 3.357464    | 2.606988    |
| 3101.274566 | 19.072228   | 14.825854   |
| 3104.729903 | 68.446246   | 53.266177   |
| 3108.575055 | 2.584117    | 2.013500    |
| 3111.252059 | 29.766193   | 23.213283   |
| 3129.737818 | 2.966358    | 2.327071    |
| 3137.636190 | 0.539731    | 0.424480    |

Zero-Point Energy : 0.186362 a.u.  
 =====  
 5.071173 eV

P3-{H,D}

Coordinates in Frequency Displacement 0

| Atom   | X         | Y         | Z (Angstrom) |
|--------|-----------|-----------|--------------|
| 1.O    | -2.592196 | -0.204867 | 4.871256     |
| 2.O    | 0.163139  | -3.823322 | 4.542926     |
| 3.C    | -1.448302 | -0.423383 | 4.827113     |
| 4.C    | 0.282948  | -2.675597 | 4.604106     |
| 5.H    | 3.032232  | -0.238810 | 6.365638     |
| 6.Ru   | 0.399978  | -0.689996 | 4.713009     |
| 7.C    | 3.452464  | -0.391199 | 5.372722     |
| 8.H    | 5.505344  | -0.140215 | 5.958227     |
| 9.N    | 2.553609  | -0.637043 | 4.395025     |
| 10.H   | -1.423026 | -0.671414 | 1.737946     |
| 11.C   | 4.823493  | -0.344157 | 5.133833     |
| 12.C   | 0.629374  | -0.731833 | 2.410130     |
| 13.C   | -0.405687 | -0.976214 | 1.495649     |
| 14.C   | 2.999805  | -0.839638 | 3.117498     |
| 15.C   | 5.290962  | -0.555483 | 3.832060     |
| 16.C   | 1.967862  | -1.082224 | 2.104676     |
| 17.C   | 4.369171  | -0.803104 | 2.818588     |
| 18.C   | -0.117039 | -1.591557 | 0.275121     |
| 19.H   | -0.917520 | -1.787149 | -0.438495    |
| 20.H   | 6.357249  | -0.519048 | 3.608615     |
| 21.C   | 2.239696  | -1.697060 | 0.872468     |
| 22.H   | 4.697387  | -0.955737 | 1.792705     |
| 23.C   | 1.204895  | -1.948563 | -0.032904    |
| 24.H   | 3.256528  | -2.001179 | 0.627332     |
| 25.H   | 1.429651  | -2.431677 | -0.983731    |
| 26.Cl  | 0.630789  | -0.779423 | 7.127182     |
| 27.H   | 0.456440  | 0.179489  | 3.123062     |
| 28.H.D | 0.531776  | 0.937598  | 4.904968     |

Intensities  
 =====

| Frequency<br>cm-1 | Dipole Strength<br>1e-40 esu <sup>2</sup> cm <sup>2</sup> | Absorption Intensity (degeneracy not counted)<br>km/mole |
|-------------------|-----------------------------------------------------------|----------------------------------------------------------|
| -----             | -----                                                     | -----                                                    |
| 40.309279         | 110.143715                                                | 1.112866                                                 |
| 50.140061         | 22.689675                                                 | 0.285162                                                 |
| 65.241448         | 153.903385                                                | 2.516807                                                 |
| 71.438902         | 48.100115                                                 | 0.861309                                                 |
| 73.479598         | 9.438252                                                  | 0.173835                                                 |
| 90.143906         | 39.259017                                                 | 0.887062                                                 |
| 101.059903        | 71.956328                                                 | 1.822745                                                 |
| 130.569913        | 123.976130                                                | 4.057507                                                 |

|             |             |             |
|-------------|-------------|-------------|
| 155.066987  | 13.477254   | 0.523840    |
| 170.377851  | 141.992901  | 6.063981    |
| 205.448738  | 66.906660   | 3.445489    |
| 229.975998  | 40.784886   | 2.351039    |
| 268.250158  | 4.949977    | 0.332829    |
| 302.382281  | 649.970202  | 49.263794   |
| 340.126817  | 70.129803   | 5.978904    |
| 353.649899  | 7.682298    | 0.680993    |
| 379.485819  | 124.342499  | 11.827507   |
| 392.555780  | 55.062949   | 5.417999    |
| 399.939121  | 101.411701  | 10.166232   |
| 426.874056  | 79.580030   | 8.514947    |
| 446.229987  | 7.928923    | 0.886852    |
| 476.429999  | 21.063349   | 2.515386    |
| 506.992500  | 97.887246   | 12.439580   |
| 544.547213  | 24.930589   | 3.402876    |
| 556.775819  | 38.819291   | 5.417589    |
| 569.143156  | 289.579541  | 41.311167   |
| 611.365205  | 131.281487  | 20.117883   |
| 616.694064  | 56.077865   | 8.668407    |
| 621.602712  | 590.001095  | 91.927148   |
| 634.852843  | 438.550850  | 69.786448   |
| 648.806126  | 142.841281  | 23.229868   |
| 707.682843  | 71.658680   | 12.711170   |
| 724.814828  | 560.254851  | 101.786637  |
| 739.346620  | 656.492658  | 121.662304  |
| 745.150958  | 6.482429    | 1.210766    |
| 778.949693  | 13.787921   | 2.692069    |
| 853.562745  | 11.780530   | 2.520452    |
| 872.587555  | 2.271163    | 0.496747    |
| 936.729904  | 16.282428   | 3.823064    |
| 950.236832  | 62.549006   | 14.898081   |
| 959.698813  | 9.487746    | 2.282317    |
| 969.937536  | 40.207023   | 9.775157    |
| 973.200060  | 60.535972   | 14.767049   |
| 979.908456  | 0.093982    | 0.023084    |
| 994.839174  | 20.484102   | 5.107965    |
| 1009.757248 | 3.951483    | 1.000127    |
| 1032.919771 | 21.784161   | 5.640083    |
| 1043.672277 | 59.923763   | 15.676218   |
| 1085.566622 | 16.686933   | 4.540577    |
| 1099.386847 | 15.429148   | 4.251778    |
| 1119.797379 | 15.367668   | 4.313457    |
| 1135.007451 | 12.660738   | 3.601935    |
| 1235.995121 | 16.932190   | 5.245755    |
| 1264.856428 | 29.126420   | 9.234352    |
| 1279.433759 | 60.871664   | 19.521404   |
| 1299.924229 | 30.466764   | 9.927101    |
| 1322.075491 | 214.101627  | 70.950309   |
| 1339.124236 | 263.597848  | 88.479121   |
| 1365.039423 | 408.106733  | 139.635879  |
| 1404.946636 | 274.822326  | 96.780956   |
| 1423.757091 | 101.543539  | 36.238171   |
| 1446.217388 | 331.435974  | 120.146547  |
| 1473.876809 | 44.587171   | 16.472108   |
| 1538.090095 | 24.031150   | 9.264765    |
| 1554.146745 | 44.306024   | 17.259685   |
| 1572.655220 | 40.871043   | 16.111178   |
| 1587.737910 | 77.432454   | 30.816259   |
| 1921.929565 | 3500.746846 | 1686.460774 |
| 1997.169618 | 2067.159032 | 1034.824995 |
| 2241.885596 | 290.834949  | 163.432382  |
| 3101.242115 | 0.199549    | 0.155118    |
| 3109.009243 | 1.932368    | 1.505878    |
| 3110.744063 | 8.927300    | 6.960853    |
| 3115.908467 | 29.477583   | 23.022614   |
| 3116.896283 | 13.096387   | 10.231797   |
| 3121.943150 | 13.190196   | 10.321773   |
| 3129.593697 | 6.517337    | 5.112534    |
| 3136.878532 | 0.079262    | 0.062322    |

Zero-Point Energy : 0.187730 a.u.

===== 5.108384 eV

TS2-{H,D}

Coordinates in Frequency Displacement 0

| Atom   | X         | Y         | Z (Angstrom) |
|--------|-----------|-----------|--------------|
| 1.O    | 1.735844  | -3.418345 | -1.135031    |
| 2.O    | -2.391373 | -1.744990 | -1.379085    |
| 3.C    | 1.187183  | -2.468216 | -0.747788    |
| 4.C    | -1.378689 | -1.412143 | -0.933413    |
| 5.H    | -0.132287 | 2.135186  | -0.559323    |
| 6.Ru   | 0.324606  | -0.943757 | -0.071908    |
| 7.C    | -0.597827 | 2.019065  | 0.418898     |
| 8.H    | -1.185182 | 4.075144  | 0.641888     |
| 9.N    | -0.566120 | 0.769392  | 0.928882     |
| 10.H   | 0.441855  | -3.799315 | 1.662843     |
| 11.C   | -1.182509 | 3.085408  | 1.096550     |
| 12.C   | -0.286138 | -1.768571 | 1.834659     |
| 13.C   | -0.167808 | -3.107096 | 2.243703     |
| 14.C   | -1.125327 | 0.525480  | 2.154559     |
| 15.C   | -1.750050 | 2.853562  | 2.354567     |
| 16.C   | -1.046676 | -0.861387 | 2.619401     |
| 17.C   | -1.717867 | 1.566711  | 2.884655     |
| 18.C   | -0.829326 | -3.554920 | 3.392299     |
| 19.H   | -0.742230 | -4.599004 | 3.694852     |
| 20.H   | -2.210003 | 3.666518  | 2.916920     |
| 21.C   | -1.705023 | -1.323728 | 3.772868     |
| 22.H   | -2.145995 | 1.363407  | 3.863642     |
| 23.C   | -1.599544 | -2.662806 | 4.153841     |
| 24.H   | -2.310413 | -0.643435 | 4.370372     |
| 25.H   | -2.116396 | -3.012164 | 5.047624     |
| 26.Cl  | 1.063422  | 0.434494  | -1.995219    |
| 27.H   | 0.982596  | -1.207588 | 1.452714     |
| 28.H.D | 1.742113  | -0.531030 | 0.743129     |

Intensities  
 =====

| Frequency<br>cm-1 | Dipole Strength<br>1e-40 esu2 cm2 | Absorption Intensity (degeneracy not counted)<br>km/mole |
|-------------------|-----------------------------------|----------------------------------------------------------|
| -953.771384       | 3500.366071                       | -836.827269                                              |
| 40.000229         | 188.271312                        | 1.887664                                                 |
| 53.041043         | 91.093808                         | 1.211097                                                 |
| 67.529414         | 39.745970                         | 0.672766                                                 |
| 76.006408         | 8.109159                          | 0.154491                                                 |
| 83.243888         | 56.258911                         | 1.173875                                                 |
| 88.240402         | 98.167697                         | 2.171272                                                 |
| 103.097343        | 5.462525                          | 0.141162                                                 |
| 130.038991        | 300.166365                        | 9.783938                                                 |
| 170.228923        | 2.446707                          | 0.104398                                                 |
| 192.107658        | 11.215031                         | 0.540037                                                 |
| 220.083284        | 251.250898                        | 13.860304                                                |
| 240.262140        | 127.721511                        | 7.691791                                                 |
| 275.521431        | 104.202889                        | 7.196366                                                 |
| 300.306566        | 605.306973                        | 45.563657                                                |
| 352.651530        | 68.056438                         | 6.015795                                                 |
| 364.829924        | 82.008969                         | 7.499458                                                 |
| 386.193351        | 772.400908                        | 74.769700                                                |
| 407.749179        | 44.797843                         | 4.578553                                                 |
| 435.800869        | 36.221495                         | 3.956695                                                 |
| 447.449563        | 2.840989                          | 0.318634                                                 |
| 464.716434        | 17.592772                         | 2.049276                                                 |
| 477.281653        | 38.752847                         | 4.636139                                                 |
| 505.185654        | 53.124454                         | 6.727033                                                 |
| 540.892622        | 124.879709                        | 16.930937                                                |
| 549.326966        | 18.782140                         | 2.586152                                                 |
| 586.159291        | 418.325650                        | 61.462216                                                |
| 598.319139        | 719.465656                        | 107.899898                                               |
| 604.740842        | 723.133691                        | 109.613985                                               |
| 618.673900        | 87.816251                         | 13.618045                                                |
| 641.672980        | 50.351416                         | 8.098480                                                 |

|             |             |             |
|-------------|-------------|-------------|
| 660.465333  | 140.049656  | 23.185162   |
| 708.004451  | 87.740286   | 15.570878   |
| 721.655851  | 387.077626  | 70.017448   |
| 738.267069  | 831.843134  | 153.933450  |
| 748.950396  | 12.661652   | 2.376958    |
| 780.535083  | 10.743968   | 2.102012    |
| 850.171140  | 6.448304    | 1.374137    |
| 868.245686  | 2.299443    | 0.500430    |
| 928.478271  | 235.939379  | 54.909849   |
| 932.084736  | 10.043314   | 2.346446    |
| 962.607271  | 3.302110    | 0.796744    |
| 967.176273  | 1.809866    | 0.438763    |
| 979.715643  | 0.172258    | 0.042302    |
| 989.876990  | 12.286147   | 3.048421    |
| 995.080247  | 12.268128   | 3.059951    |
| 1009.880955 | 13.888983   | 3.515756    |
| 1035.708085 | 4.944640    | 1.283660    |
| 1042.884807 | 79.950819   | 20.899569   |
| 1084.961609 | 26.890127   | 7.312827    |
| 1097.664007 | 19.852069   | 5.462020    |
| 1118.516114 | 21.218532   | 5.948886    |
| 1135.442532 | 25.850461   | 7.357182    |
| 1230.576584 | 13.621866   | 4.201683    |
| 1263.873876 | 45.005541   | 14.257645   |
| 1277.726394 | 58.631739   | 18.777973   |
| 1302.194114 | 36.216946   | 11.821311   |
| 1314.510206 | 34.330316   | 11.311491   |
| 1324.358001 | 92.705047   | 30.774205   |
| 1398.586020 | 76.415538   | 26.788533   |
| 1419.393394 | 111.126009  | 39.536350   |
| 1438.603043 | 72.404193   | 26.108551   |
| 1462.771344 | 248.668036  | 91.174728   |
| 1535.297570 | 33.112272   | 12.742646   |
| 1547.052214 | 37.669535   | 14.607413   |
| 1564.241171 | 35.930246   | 14.087761   |
| 1587.694494 | 135.427481  | 53.895413   |
| 1855.220661 | 1351.718520 | 628.579056  |
| 1933.667415 | 3190.975330 | 1546.618838 |
| 2014.072658 | 1800.045063 | 908.733590  |
| 3096.330812 | 0.529252    | 0.410760    |
| 3102.630698 | 38.043888   | 29.586463   |
| 3103.219308 | 28.960838   | 22.526912   |
| 3105.367821 | 5.792753    | 4.508957    |
| 3110.711246 | 5.758629    | 4.490109    |
| 3119.163524 | 16.816668   | 13.147893   |
| 3125.099908 | 5.230645    | 4.097295    |
| 3135.770471 | 0.549058    | 0.431560    |

Zero-Point Energy : 0.183953 a.u.  
===== 5.005605 eV  
(imaginary frequencies were excluded from the summation)

P4-{H,D}

Coordinates in Frequency Displacement 0

| Atom | X         | Y         | Z (Angstrom) |
|------|-----------|-----------|--------------|
| 1.O  | 1.591669  | -3.518772 | -1.041079    |
| 2.O  | -2.317040 | -1.685991 | -1.437725    |
| 3.C  | 1.101070  | -2.523376 | -0.695949    |
| 4.C  | -1.319899 | -1.400556 | -0.921942    |
| 5.H  | -0.226437 | 2.124237  | -0.596302    |
| 6.Ru | 0.289950  | -0.945164 | -0.067445    |
| 7.C  | -0.676114 | 2.006236  | 0.389033     |
| 8.H  | -1.286615 | 4.055634  | 0.613868     |
| 9.N  | -0.618167 | 0.760769  | 0.908083     |
| 10.H | 0.195289  | -3.862028 | 1.462622     |
| 11.C | -1.262885 | 3.067703  | 1.071336     |
| 12.C | -0.405292 | -1.793534 | 1.712700     |
| 13.C | -0.282316 | -3.132493 | 2.117371     |
| 14.C | -1.152597 | 0.508085  | 2.143260     |
| 15.C | -1.810655 | 2.829145  | 2.337457     |

Electronic Supplementary Information for Dalton Transactions  
 This journal is © The Royal Society of Chemistry 2010

|        |           |           |           |
|--------|-----------|-----------|-----------|
| 16.C   | -1.038270 | -0.878312 | 2.595728  |
| 17.C   | -1.753206 | 1.545648  | 2.873328  |
| 18.C   | -0.765623 | -3.555813 | 3.363801  |
| 19.H   | -0.656133 | -4.600918 | 3.657707  |
| 20.H   | -2.279412 | 3.636311  | 2.900999  |
| 21.C   | -1.522569 | -1.310211 | 3.847128  |
| 22.H   | -2.173315 | 1.341311  | 3.855480  |
| 23.C   | -1.387474 | -2.644503 | 4.230612  |
| 24.H   | -2.004206 | -0.605135 | 4.524035  |
| 25.H   | -1.764013 | -2.973930 | 5.199044  |
| 26.Cl  | 1.173138  | 0.481606  | -1.948605 |
| 27.H   | 1.666814  | -0.732607 | 1.166185  |
| 28.H.D | 1.921719  | -0.276448 | 0.549566  |

Intensities  
 =====

| Frequency<br>cm-1 | Dipole Strength<br>1e-40 esu <sup>2</sup> cm <sup>2</sup> | Absorption Intensity (degeneracy not counted)<br>km/mole |
|-------------------|-----------------------------------------------------------|----------------------------------------------------------|
| -----             | -----                                                     | -----                                                    |
| 35.751922         | 261.928958                                                | 2.347259                                                 |
| 48.519361         | 31.408640                                                 | 0.381981                                                 |
| 66.285362         | 120.127299                                                | 1.995894                                                 |
| 77.679815         | 29.396822                                                 | 0.572383                                                 |
| 83.824451         | 11.501976                                                 | 0.241669                                                 |
| 92.743388         | 11.211877                                                 | 0.260639                                                 |
| 105.689151        | 4.440286                                                  | 0.117630                                                 |
| 125.408888        | 328.770712                                                | 10.334739                                                |
| 180.374904        | 106.159737                                                | 4.799699                                                 |
| 195.977969        | 15.100520                                                 | 0.741784                                                 |
| 220.197361        | 434.893207                                                | 24.003402                                                |
| 244.415596        | 92.029936                                                 | 5.638143                                                 |
| 257.921015        | 21.625937                                                 | 1.398105                                                 |
| 272.902015        | 335.820937                                                | 22.971671                                                |
| 293.342113        | 267.375565                                                | 19.659578                                                |
| 326.980239        | 516.980353                                                | 42.371478                                                |
| 367.461023        | 78.782813                                                 | 7.256394                                                 |
| 380.305086        | 71.797306                                                 | 6.844132                                                 |
| 413.775437        | 105.271222                                                | 10.918235                                                |
| 438.206377        | 38.027754                                                 | 4.176932                                                 |
| 461.812096        | 254.771144                                                | 29.491279                                                |
| 465.333886        | 6.177238                                                  | 0.720505                                                 |
| 474.228645        | 130.521356                                                | 15.514845                                                |
| 496.298017        | 13.392047                                                 | 1.665971                                                 |
| 524.017850        | 92.547331                                                 | 12.155926                                                |
| 549.648536        | 74.733047                                                 | 10.296173                                                |
| 561.720384        | 416.791289                                                | 58.683619                                                |
| 589.085715        | 462.686924                                                | 68.319360                                                |
| 620.442434        | 69.544843                                                 | 10.815447                                                |
| 630.865767        | 301.828285                                                | 47.728190                                                |
| 638.943184        | 55.461690                                                 | 8.882463                                                 |
| 654.444811        | 6.961526                                                  | 1.141972                                                 |
| 709.698843        | 101.728452                                                | 18.096501                                                |
| 720.108724        | 300.294831                                                | 54.203084                                                |
| 737.199248        | 802.664541                                                | 148.319083                                               |
| 742.209313        | 89.607982                                                 | 16.670597                                                |
| 751.695633        | 28.260515                                                 | 5.324762                                                 |
| 780.326378        | 11.630026                                                 | 2.274757                                                 |
| 843.014406        | 2.801587                                                  | 0.591994                                                 |
| 865.191162        | 2.934264                                                  | 0.636340                                                 |
| 922.846502        | 3.228640                                                  | 0.746839                                                 |
| 959.899042        | 1.810263                                                  | 0.435557                                                 |
| 962.088081        | 3.283853                                                  | 0.791911                                                 |
| 978.175126        | 0.338836                                                  | 0.083078                                                 |
| 993.173630        | 14.675002                                                 | 3.653267                                                 |
| 999.876201        | 152.691222                                                | 38.268230                                                |
| 1010.556089       | 5.567138                                                  | 1.410167                                                 |
| 1039.175070       | 2.791989                                                  | 0.727244                                                 |
| 1045.116315       | 112.980128                                                | 29.596800                                                |
| 1086.258490       | 10.080528                                                 | 2.744698                                                 |
| 1096.342593       | 22.853172                                                 | 6.280162                                                 |
| 1120.532876       | 23.352985                                                 | 6.559112                                                 |
| 1137.455275       | 32.961979                                                 | 9.397789                                                 |
| 1232.341285       | 46.334716                                                 | 14.312503                                                |
| 1260.968459       | 83.205789                                                 | 26.298794                                                |

Electronic Supplementary Information for Dalton Transactions  
This journal is © The Royal Society of Chemistry 2010

|             |             |             |
|-------------|-------------|-------------|
| 1268.805561 | 152.596380  | 48.530792   |
| 1278.184637 | 40.385763   | 12.938977   |
| 1299.040579 | 60.664736   | 19.753183   |
| 1309.390160 | 80.472017   | 26.411437   |
| 1400.061017 | 134.863629  | 47.328188   |
| 1415.761044 | 80.995355   | 28.742739   |
| 1435.872910 | 16.396949   | 5.901428    |
| 1461.360595 | 467.266533  | 171.159157  |
| 1532.748426 | 58.272273   | 22.387774   |
| 1545.289890 | 114.488283  | 44.345451   |
| 1562.949417 | 159.396800  | 62.445708   |
| 1587.022787 | 253.612055  | 100.886052  |
| 1937.352680 | 3085.566923 | 1498.379175 |
| 2010.418303 | 2265.701667 | 1141.740019 |
| 3008.330115 | 2.812505    | 2.120786    |
| 3083.905385 | 3.241633    | 2.505780    |
| 3097.768396 | 5.796189    | 4.500591    |
| 3100.812120 | 14.993374   | 11.653406   |
| 3105.033241 | 66.584942   | 51.822737   |
| 3108.397471 | 3.416965    | 2.662288    |
| 3111.409588 | 30.526956   | 23.807772   |
| 3129.280359 | 2.491723    | 1.954440    |
| 3136.695439 | 0.875185    | 0.688098    |

Zero-Point Energy : 0.186388 a.u.  
===== 5.071867 eV
